# Supplementary material for: Structure activity relationship studies on rhodanines and derived enethiol inhibitors of metallo-β-lactamases
Source: PubMed Central journal article supplement (PMC6008492; doi:10.1016/j.bmc.2018.02.043), 2018-07-15
Supplement: mmc1.pdf [file mmc1.pdf]

*Supplementary Information for:*

**Structure activity relationship studies on rhodanines and derived  
enethiol inhibitors of metallo- $\beta$ -lactamases**

Dong Zhang<sup>a</sup>, Marios S. Markoulides<sup>a</sup>, Dmitrijs Stepanovs<sup>a,1</sup>, Anna M. Rydzik<sup>a</sup>, Ahmed El-Hussein<sup>a,2</sup>,  
Corentin Bon<sup>a,3</sup>, Jos J. A. G. Kamps<sup>a</sup>, Klaus-Daniel Umland<sup>a,4</sup>, Patrick M. Collins<sup>b</sup>, Samuel T. Cahill<sup>a</sup>,  
David Y. Wang<sup>a</sup>, Frank von Delft<sup>b,d,e</sup>, Timothy D. W. Claridge<sup>a</sup>, Jürgen Brem<sup>a</sup>, Michael A. McDonough<sup>a</sup>,  
and Christopher J. Schofield<sup>a,\*</sup>

<sup>a</sup> Department of Chemistry, University of Oxford, Chemistry Research Laboratory, 12 Mansfield Road, Oxford, OX1 3TA, United Kingdom

<sup>b</sup> Diamond Light Source, Harwell Science and Innovation Campus, Didcot, OX11 0DE, United Kingdom

<sup>c</sup> The National Institute of Laser Enhanced Science, Cairo University, Egypt

<sup>d</sup> Structural Genomics Consortium (SGC), University of Oxford, Oxford, OX3 7DQ, UK3

<sup>e</sup> Department of Biochemistry, University of Johannesburg, Auckland Park, 2006, South Africa

\*To whom correspondence should be addressed. *Email:* [christopher.schofield@chem.ox.ac.uk](mailto:christopher.schofield@chem.ox.ac.uk)

*Telephone:* +44 (0)1865 275 625. *Fax:* +44 (0)1865 285 002. *Address:* Chemistry Research Laboratory,  
12 Mansfield Road, Oxford, OX1 3TA, United Kingdom

---

\* Corresponding author. Tel.: +44 (0)1865 285 000; fax: +44 (0)1865 285 002; e-mail: christopher.schofield@chem.ox.ac.uk

<sup>1</sup> Present address: Latvian Institute of Organic Synthesis, Aizkraukles Str. 21 Riga, LV-1006, Latvia.

<sup>2</sup> Present address: Boehringer Ingelheim Pharma GmbH & Co KG Birkendorfer Strasse 65, 88397 Biberach an der Riss, Germany.

<sup>3</sup> Present address (on leave from): The National Institute of Laser Enhanced Science, Cairo University, Egypt.

<sup>4</sup> Present address: École polytechnique université, Paris saclay Route de Saclay, 91128 Palaiseau.

<sup>5</sup> Present address: Vifor Pharma, Flughofstrasse 61, 8152 Glattbrugg, Switzerland .

## Table of Contents

|                                                                     |      |
|---------------------------------------------------------------------|------|
| 1. Extended materials and methods                                   | S3   |
| 2. Compound characterisation                                        | S4   |
| 3. NMR $^1\text{H}$ and $^{13}\text{C}$ spectra                     | S22  |
| 4. Extended biochemical results and tables                          | S84  |
| Table S1 Residual activities 16, 17, 22, 26 against MBLs            | S84  |
| Figure S1 SBL inhibition                                            | S85  |
| Figure S2 BCII IC <sub>50</sub> traces                              | S87  |
| Figure S3 IMP-1 IC <sub>50</sub> traces                             | S89  |
| Figure S4 NDM-1 IC <sub>50</sub> traces                             | S91  |
| Figure S5 SPM-1 IC <sub>50</sub> traces                             | S93  |
| Figure S6 VIM-2 IC <sub>50</sub> traces                             | S95  |
| Figure S7 NMR reaction time course spectra                          | S97  |
| Figure S8 NMR reaction time course plot                             | S98  |
| 5. Crystallography                                                  | S99  |
| Table S2 Crystallographic data processing and refinement statistics | S99  |
| Figure S9 Structure of BcII: <b>6c</b>                              | S100 |
| Figure S10 Structure of BcII: <b>6k</b>                             | S101 |
| Figures S11 Structure of BcII: <b>6l</b>                            | S102 |
| Figure S12 Structure of VIM-2: <b>ML302F</b>                        | S103 |
| Figures S13 MBL product binding                                     | S104 |
| 6. Author contributions                                             | S105 |
| 7. References                                                       | S106 |

## 1. Extended Materials and Methods:

**Reagents** were obtained from commercial sources and either used as supplied or purified using appropriate standard procedures.

**Solvents** (including dry solvents) for chemical transformations, work-up and chromatography were from Sigma-Aldrich (Dorset, UK) at HPLC grade, and used without further purification.

**Column chromatography** was performed using prepacked SNAP columns on a Biotage SP1 Purification system (Uppsala, Sweden).

**Thin-layer chromatography** (TLC) was carried out using Merck aluminium plates coated with HF<sub>254/366</sub> silica gel. Visualization was performed with a 254 nm ultraviolet (UV) light source and/or by immersion in potassium permanganate or phosphomolybdic acid (PMA) solutions.

**Microwave** assisted reactions were performed using a Biotage Initiator™ microwave synthesizer in sealed vials.

**Deuterated solvents** were from Cambridge Isotopes, Apollo Scientific Ltd, and/or Sigma-Aldrich.

**<sup>1</sup>H** and **<sup>13</sup>C NMR** spectra were recorded either using a Bruker Avance III HD NanoBay 400 spectrometer, Bruker Avance III HD NanoBay 600 spectrometer, or using a Bruker Avance II 500 with <sup>13</sup>C cryoprobe spectrometers. Residual non-deuterated solvent was used as the internal standard for <sup>1</sup>H NMR spectra, and a carbon signal of the solvent was used as the internal standard for <sup>13</sup>C NMR spectra. Chemical shifts ( $\delta$ ) are given in parts per million (ppm) downfield from tetramethylsilane (TMS). The resonance multiplicity patterns are described as singlet (s), broad singlet (br s), doublet (d), triplet (t), quartet (q), quintet (quin), multiplet (m), or a combination of these. Coupling constants ( $J$ ) are quoted in hertz (Hz) to the nearest 0.5 Hz. Peak assignments were aided by COSY, HMQC, and/or HMBC whenever necessary.

**High-resolution mass spectra** were recorded either using a Bruker MicroTOF instrument using an ESI source and Time of Flight (TOF) analyser.

**IR** spectra were recorded on a Bruker Tensor 27 Attenuated Total Reflection (ATR) FT-IR spectrometer, and absorbance bands are quoted in cm<sup>-1</sup>.

## 2. Compound Characterisation:

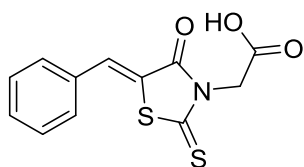

**(5-Benzylidene-4-oxo-2-thioxothiazolidin-3-yl)acetic acid 3a:** isolated as a yellow solid (85%). **mp** 217-236 °C. **R<sub>f</sub>** = 0.60 (CH<sub>2</sub>Cl<sub>2</sub> : MeOH, 9 : 1). **IR**  $\nu_{\max}$  (ATR)/cm<sup>-1</sup>: 3160 (COO-H), 1731 (HOC=O), 1683 (NC=O), 1588 (SC=C).

**HRMS** (ESI<sup>-</sup>): calculated for C<sub>12</sub>H<sub>8</sub>NO<sub>3</sub>S<sub>2</sub> [M - H]<sup>-</sup> requires 277.9951; found 277.9955. **<sup>1</sup>H NMR** (400 MHz, DMSO-d<sub>6</sub>):  $\delta_{\text{H}}$  7.89 (s, 1H), 7.68 (d, *J* = 7.0 Hz, 2H), 7.47-7.63 (m, 3H), 4.68 (s, 2H). **<sup>13</sup>C NMR** (100 MHz, DMSO-d<sub>6</sub>)  $\delta_{\text{C}}$  193.77, 167.81, 166.95, 134.11, 133.35, 131.63, 131.22, 130.03, 122.55, 46.14.

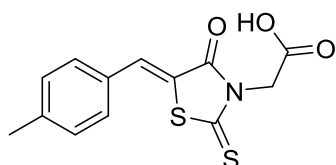

**(5-(4-Methylbenzylidene)-4-oxo-2-thioxothiazolidin-3-yl)acetic acid 3b:** isolated as a yellow solid (79%). **mp** 247-359 °C. **R<sub>f</sub>** = 0.55 (CH<sub>2</sub>Cl<sub>2</sub> : MeOH, 9 : 1). **IR**  $\nu_{\max}$  (ATR)/cm<sup>-1</sup>: 3095 (COO-H), 1699 (HOC=O), 1656 (NC=O), 1594 (SC=C). **HRMS** (ESI<sup>-</sup>): calculated for C<sub>13</sub>H<sub>10</sub>NO<sub>3</sub>S<sub>2</sub> [M - H]<sup>-</sup> requires 292.0108; found 292.0114.

**<sup>1</sup>H NMR** (400 MHz, DMSO-d<sub>6</sub>)  $\delta_{\text{H}}$  7.70 (s, 1H), 7.53 (d, *J* = 9.0 Hz, 2H), 7.23 (d, *J* = 9.0 Hz, 2H), 4.71 (s, 2H), 2.55 (s, 3H). **<sup>13</sup>C NMR** (100 MHz, DMSO-d<sub>6</sub>)  $\delta_{\text{C}}$  193.41, 166.42, 165.76, 163.00, 134.14, 132.93, 132.13, 125.89, 123.23, 55.81, 45.88.

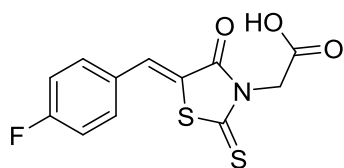

**(5-(4-Fluorobenzylidene)-4-oxo-2-thioxothiazolidin-3-yl)acetic acid 3c:** isolated as a yellow solid (82%). **mp** 225-235 °C. **R<sub>f</sub>** = 0.55 (CH<sub>2</sub>Cl<sub>2</sub> : MeOH, 9 : 1). **IR**  $\nu_{\max}$  (ATR)/cm<sup>-1</sup>: 3172 (COO-H), 1732 (HOC=O), 1676 (NC=O), 1581 (SC=C). **HRMS** (ESI<sup>-</sup>): calculated for C<sub>12</sub>H<sub>8</sub>FNO<sub>3</sub>S<sub>2</sub> [M]<sup>-</sup> requires 295.9857; found 295.9861.

**<sup>1</sup>H NMR** (400 MHz, DMSO-d<sub>6</sub>)  $\delta_{\text{H}}$  7.91 (s, 1H), 7.77 (dd, *J* = 8.7, 5.0 Hz, 2H), 7.43 (t, *J* = 8.5 Hz, 2H), 4.68 (s, 2H). **<sup>13</sup>C NMR** (100 MHz, DMSO-d<sub>6</sub>)  $\delta_{\text{C}}$  193.59, 167.70, 166.90, 163.75 (d, *J* = 251.5 Hz), 133.79 (d, *J* = 9.0 Hz), 133.00, 130.07 (d, *J* = 3.0 Hz), 122.23, 117.24 (d, *J* = 22.0 Hz), 46.14.

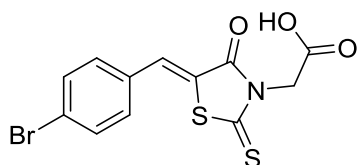

**(5-(4-Bromobenzylidene)-4-oxo-2-thioxothiazolidin-3-yl)acetic acid 3d:** isolated as a yellow solid (84%). **mp** 239-253 °C. **R<sub>f</sub>** = 0.50 (CH<sub>2</sub>Cl<sub>2</sub> : MeOH, 9 : 1). **IR**  $\nu_{\max}$  (ATR)/cm<sup>-1</sup>: 3090 (COO-H), 1709 (HOC=O), 1589 (NC=O), 1587 (SC=C). **HRMS** (ESI<sup>-</sup>): calculated for C<sub>12</sub>H<sub>7</sub>BrNO<sub>3</sub>S<sub>2</sub> [M - H]<sup>-</sup> requires 355.9056; found 355.9062.

**<sup>1</sup>H NMR** (400 MHz, DMSO-d<sub>6</sub>)  $\delta_{\text{H}}$  7.85 (s, 1H), 7.76 (d, *J* = 8.5 Hz, 2H), 7.60 (d, *J* = 8.5 Hz, 2H), 4.72 (s, 2H); **<sup>13</sup>C NMR** (100 MHz, DMSO-d<sub>6</sub>)  $\delta_{\text{C}}$  193.38, 167.73, 166.81, 133.00, 132.94, 132.48, 125.37, 123.17, 45.75, 44.14.

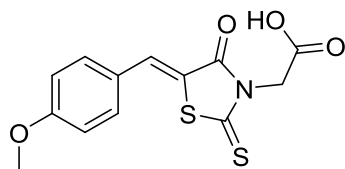

**(5-(4-Methoxybenzylidene)-4-oxo-2-thioxothiazolidin-3-yl)acetic acid 3e:**

isolated as a yellow solid (80%). **mp** 187-243 °C.  $R_f = 0.50$  ( $\text{CH}_2\text{Cl}_2$  : MeOH, 9 : 1). **IR**  $\nu_{\text{max}}$  (ATR)/ $\text{cm}^{-1}$ : 2963 (COO-H), 1679 (HOC=O), 1586 (NC=O), 1564 (SC=C). **HRMS** (ESI<sup>-</sup>): calculated for  $\text{C}_{13}\text{H}_{10}\text{NO}_4\text{S}_2$   $[\text{M} - \text{H}]^-$  requires 308.0057; found 308.0062. **<sup>1</sup>H NMR** (400 MHz, DMSO- $d_6$ )  $\delta_{\text{H}}$  7.82 (s, 1H), 7.63 (d,  $J = 9.0$  Hz, 2H), 7.12 (d,  $J = 9.0$  Hz, 2H), 4.68 (s, 2H), 3.85 (s, 3H). **<sup>13</sup>C NMR** (100 MHz, DMSO- $d_6$ )  $\delta_{\text{C}}$  193.54 167.86, 166.99, 162.15, 134.33, 133.53, 125.89, 119.10, 115.66, 56.08, 45.96.

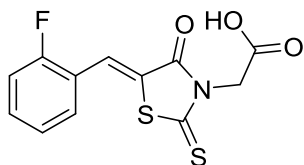

**(5-(2-Fluorobenzylidene)-4-oxo-2-thioxothiazolidin-3-yl)acetic acid 3f:**

isolated as an orange solid (76%). **mp** 230-249 °C.  $R_f = 0.50$  ( $\text{CH}_2\text{Cl}_2$  : MeOH, 9 : 1). **IR**  $\nu_{\text{max}}$  (ATR)/ $\text{cm}^{-1}$ : 2993 (COO-H), 1713 (HOC=O), 1604 (NC=O), 1397 (SC=C). **HRMS** (ESI<sup>-</sup>): calculated for  $\text{C}_{12}\text{H}_7\text{FNO}_3\text{S}_2$   $[\text{M} - \text{H}]^-$  requires 295.9857; found 295.9860.

**<sup>1</sup>H NMR** (400 MHz, DMSO- $d_6$ )  $\delta_{\text{H}}$  7.82 (s, 1 H), 7.60 (t,  $J = 7.0$  Hz, 2H), 7.37-7.47 (m, 2H), 4.69 (s, 2H). **<sup>13</sup>C NMR** (100 MHz, DMSO- $d_6$ )  $\delta_{\text{C}}$  193.46, 167.70, 166.71, 161.12 (d,  $J = 253.0$  Hz), 134.02 (d,  $J = 9.0$  Hz), 130.19, 126.15 (d,  $J = 3.5$  Hz), 125.72-124.28 (m), 121.19 (d,  $J = 12.0$  Hz), 116.84 (d,  $J = 21.5$  Hz), 46.09.

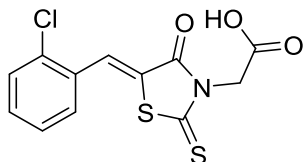

**(5-(2-Chlorobenzylidene)-4-oxo-2-thioxothiazolidin-3-yl)acetic acid 3g:**

isolated as a yellow solid (77%). **mp** 234-237 °C.  $R_f = 0.55$  ( $\text{CH}_2\text{Cl}_2$  : MeOH, 9 : 1). **IR**  $\nu_{\text{max}}$  (ATR)/ $\text{cm}^{-1}$ : 2926 (COO-H), 1708 (HOC=O), 1594 (NC=O), 1433 (SC=C). **HRMS** (ESI<sup>-</sup>): calculated for  $\text{C}_{12}\text{H}_7\text{ClNO}_3\text{S}_2$   $[\text{M} - \text{H}]^-$  requires 311.9561; found 311.9567. **<sup>1</sup>H NMR** (400 MHz, DMSO- $d_6$ )  $\delta_{\text{H}}$  7.95 (s, 1 H), 7.66 (dd,  $J = 6.0, 3.5$  Hz, 1H), 7.58-7.62 (m, 1H), 7.52-7.57 (m, 1H), 4.72 (s, 2H). **<sup>13</sup>C NMR** (100 MHz, DMSO- $d_6$ )  $\delta_{\text{C}}$  193.54, 167.70, 166.58, 135.38, 132.99, 131.16, 130.99, 130.02, 128.83, 125.99, 45.86.

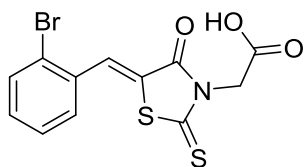

**(5-(2-Bromobenzylidene)-4-oxo-2-thioxothiazolidin-3-yl)acetic acid 3h:**

isolated as a yellow solid (83%). **mp** 235-249 °C.  $R_f = 0.55$  ( $\text{CH}_2\text{Cl}_2$  : MeOH, 9 : 1). **IR**  $\nu_{\text{max}}$  (ATR)/ $\text{cm}^{-1}$ : 3028 (COO-H), 1706 (HOC=O), 1594 (NC=O), 1429 (SC=C). **HRMS** (ESI<sup>-</sup>) calculated for  $\text{C}_{12}\text{H}_7\text{BrNO}_3\text{S}_2$   $[\text{M} - \text{H}]^-$  requires 355.9056; found 355.9060.

**<sup>1</sup>H NMR** (400 MHz, DMSO- $d_6$ )  $\delta_{\text{H}}$  8.00 (s, 1H), 7.57 (d,  $J = 8.0$  Hz, 1H), 7.33 (m, 3H), 4.27 (s, 2H). **<sup>13</sup>C NMR** (100 MHz, DMSO- $d_6$ )  $\delta_{\text{C}}$  193.20, 167.94, 165.43, 141.02, 137.48, 136.99, 130.14, 130.55, 129.98, 126.23, 105.01, 45.73.

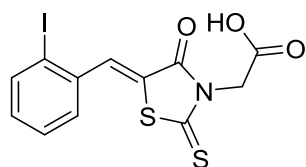

**(5-(2-Iodobenzylidene)-4-oxo-2-thioxothiazolidin-3-yl)acetic acid 3i:** isolated as a yellow solid (75%). mp 229-240 °C.  $R_f = 0.55$  ( $\text{CH}_2\text{Cl}_2$  : MeOH, 9 : 1). IR  $\nu_{\text{max}}$  (ATR)/ $\text{cm}^{-1}$ : 2938 (COO-H), 1703 (HOC=O), 1588 (NC=O), 1393 (SC=C).

**HRMS** (ESI<sup>-</sup>): calculated for  $\text{C}_{12}\text{H}_7\text{NO}_3\text{S}_2$  [ $\text{M} - \text{H}$ ]<sup>-</sup> requires 403.8918; found 403.8925. **<sup>1</sup>H NMR** (400 MHz, DMSO- $d_6$ )  $\delta_{\text{H}}$  8.06 (d,  $J = 8.0$  Hz, 1H), 7.82 (s, 1H), 7.51-7.62 (m, 2H), 7.20-7.28 (m, 1H), 4.71 (s, 2H). **<sup>13</sup>C NMR** (100 MHz, DMSO- $d_6$ )  $\delta_{\text{C}}$  193.69, 167.74, 166.43, 140.73, 136.71, 136.16, 132.87, 129.83, 129.49, 125.73, 104.00, 45.90.

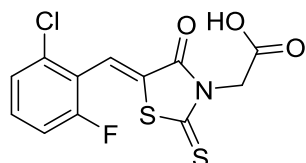

**(5-(2-Chloro-6-fluorobenzylidene)-4-oxo-2-thioxothiazolidin-3-yl)acetic acid 3j:** isolated as a yellow solid (84%). mp 237-250 °C.  $R_f = 0.50$  ( $\text{CH}_2\text{Cl}_2$  : MeOH, 9 : 1). IR  $\nu_{\text{max}}$  (ATR)/ $\text{cm}^{-1}$ : 3026 (COO-H), 1717 (HOC=O), 1598 (NC=O), 1393 (SC=C). **HRMS** (ESI<sup>-</sup>): calculated for  $\text{C}_{12}\text{H}_6\text{ClFNO}_3\text{S}_2$  [ $\text{M} - \text{H}$ ]<sup>-</sup> requires 329.9467; found 329.9473.

**<sup>1</sup>H NMR** (400 MHz, DMSO- $d_6$ )  $\delta_{\text{H}}$  13.54 (br s, 1H), 7.79 (s, 1H), 7.56-7.66 (m, 1H), 7.48-7.55 (m, 1H), 7.41 (t,  $J = 9.5$  Hz, 1H), 4.74 (s, 2H). **<sup>13</sup>C NMR** (100 MHz, DMSO- $d_6$ )  $\delta_{\text{C}}$  193.38 (d,  $J = 6.5$  Hz), 167.70, 165.99, 159.44 (d,  $J = 253.0$  Hz), 134.86 (d,  $J = 5.0$  Hz), 133.84 (d,  $J = 10.0$  Hz), 129.74 (d,  $J = 1.5$  Hz), 126.83 (d,  $J = 3.0$  Hz), 125.18, 120.22 (d,  $J = 18.0$  Hz), 115.94 (d,  $J = 22.0$  Hz), 45.63.

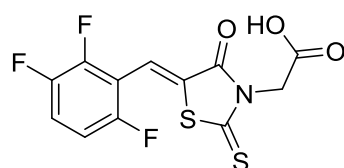

**(4-Oxo-2-thioxo-5-(2,3,6-trifluorobenzylidene)thiazolidin-3-yl)acetic acid 3k:** isolated as an orange solid (78%). mp 195-228 °C.  $R_f = 0.50$  ( $\text{CH}_2\text{Cl}_2$  : MeOH, 9 : 1). IR  $\nu_{\text{max}}$  (ATR)/ $\text{cm}^{-1}$ : 3212 (COO-H), 1709 (HOC=O), 1681 (NC=O), 1602 (SC=C). **HRMS** (ESI<sup>-</sup>): calculated for  $\text{C}_{12}\text{H}_5\text{F}_3\text{NO}_3\text{S}_2$  [ $\text{M} - \text{H}$ ]<sup>-</sup> requires 331.9668; found 331.9669.

**<sup>1</sup>H NMR** (400 MHz, DMSO- $d_6$ )  $\delta_{\text{H}}$  7.72 (s, 1H), 7.76 (m, 1H), 7.38 (m, 1H), 4.75 (s, 2H). **<sup>13</sup>C NMR** (100 MHz, DMSO- $d_6$ )  $\delta_{\text{C}}$  193.31, 167.71, 166.22, 155.25 (d,  $J = 249.5$  Hz), 148.96-146.01 (m), 148.48-145.33 (m), 130.05, 120.83 (dd,  $J = 19.5, 10.5$  Hz), 119.90, 112.91 (dd,  $J = 24.5, 4.0$  Hz), 112.75-112.28 (m), 46.23.

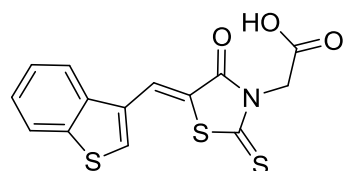

**(5-(Benzo[b]thiophen-3-ylmethylene)-4-oxo-2-thioxothiazolidin-3-yl)acetic acid 3l:** isolated as a yellow solid (76%). mp 242-266 °C.  $R_f = 0.60$  ( $\text{CH}_2\text{Cl}_2$  : MeOH, 9 : 1). IR  $\nu_{\text{max}}$  (ATR)/ $\text{cm}^{-1}$ : 3132 (COO-H), 1703 (HOC=O), 1702 (NC=O), 1587 (SC=C). **HRMS** (ESI<sup>-</sup>): calculated for  $\text{C}_{14}\text{H}_8\text{NO}_4\text{S}_2$  [ $\text{M} - \text{H}$ ]<sup>-</sup> requires 333.9672; found 333.9678.

**<sup>1</sup>H NMR** (400 MHz, DMSO- $d_6$ )  $\delta_{\text{H}}$  7.95 (s, 1H), 7.49-7.71 (m, 4H), 7.55 (s, 1H), 4.72 (s, 2H). **<sup>13</sup>C NMR** (100 MHz, DMSO- $d_6$ )  $\delta_{\text{C}}$  193.54, 167.70, 166.58, 135.38, 132.99, 131.16, 130.99, 130.02, 128.83, 125.99, 45.86.

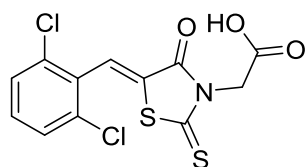

**(5-(2,6-Dichlorobenzylidene)-4-oxo-2-thioxothiazolidin-3-yl)acetic acid 3m:** isolated as a yellow solid (83%). **mp** 235-237 °C.  $R_f = 0.50$  ( $\text{CH}_2\text{Cl}_2$  : MeOH, 9 : 1). **IR**  $\nu_{\text{max}}$  (ATR)/ $\text{cm}^{-1}$ : 2931 (COO-H), 1710 (HOC=O), 1600 (NC=O), 1442 (SC=C).

**HRMS** (ESI+): calculated for  $\text{C}_{12}\text{H}_7\text{Cl}_2\text{NO}_3\text{S}_2\text{Na}$  [ $\text{M} + \text{Na}$ ] $^+$  requires 369.9137; found 369.9137.  **$^1\text{H}$  NMR** (400 MHz,  $\text{DMSO-d}_6$ )  $\delta_{\text{H}}$  7.86 (s, 1H), 7.71-7.60 (m, 2H), 7.54 (ddd,  $J = 9.0, 7.3, 0.7$  Hz, 1H), 4.68 (s, 3H).  **$^{13}\text{C}$  NMR** (100 MHz,  $\text{DMSO-d}_6$ )  $\delta_{\text{C}}$  193.23, 167.66, 165.45, 133.43, 132.74, 131.37, 131.20, 129.41, 129.32, 46.27.

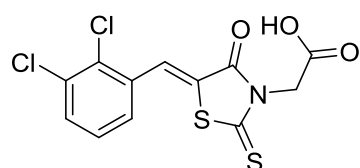

**(5-(2,3-Dichlorobenzylidene)-4-oxo-2-thioxothiazolidin-3-yl)acetic acid 3n:** isolated as a yellow solid (81%). **mp** 236-237 °C.  $R_f = 0.50$  ( $\text{CH}_2\text{Cl}_2$  : MeOH, 9 : 1). **IR**  $\nu_{\text{max}}$  (ATR)/ $\text{cm}^{-1}$ : 2930 (COO-H), 1708 (HOC=O), 1598 (NC=O), 1440 (SC=C). **HRMS** (ESI-): calculated for  $\text{C}_{12}\text{H}_6\text{Cl}_2\text{NO}_3\text{S}_2$  [ $\text{M} - \text{H}$ ] $^-$  requires 345.9172; found 345.9167.  **$^1\text{H}$  NMR** (400 MHz,  $\text{DMSO-d}_6$ )  $\delta_{\text{H}}$  7.83 (s, 1H), 7.70 (d,  $J = 8.5$  Hz, 1H), 7.61 (dd,  $J = 8.5, 2.5$  Hz, 1H), 7.55 (d,  $J = 2.5$  Hz, 1H), 4.69 (s, 2H).  **$^{13}\text{C}$  NMR** (100 MHz,  $\text{DMSO-d}_6$ )  $\delta_{\text{C}}$  193.01, 167.63, 166.34, 133.67, 133.16, 132.52, 132.38, 129.02, 127.81, 127.47, 46.10.

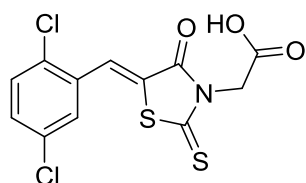

**(5-(2,5-Dichlorobenzylidene)-4-oxo-2-thioxothiazolidin-3-yl)acetic acid 3o:** isolated as a yellow solid (80%). **mp** 237-238 °C.  $R_f = 0.50$  ( $\text{CH}_2\text{Cl}_2$  : MeOH, 9 : 1). **IR**  $\nu_{\text{max}}$  (ATR)/ $\text{cm}^{-1}$ : 2933 (COO-H), 1705 (HOC=O), 1595 (NC=O), 1447 (SC=C). **HRMS** (ESI-): calculated for  $\text{C}_{12}\text{H}_6\text{Cl}_2\text{NO}_3\text{S}_2$  [ $\text{M} - \text{H}$ ] $^-$  requires 345.9172; found 345.9167.  **$^1\text{H}$  NMR** (400 MHz,  $\text{DMSO-d}_6$ )  $\delta_{\text{H}}$  13.59 (br s, 1H), 7.92 (s, 1H), 7.78 (dd,  $J = 7.5, 2.0$  Hz, 1H), 7.59-7.50 (m, 2H), 4.75 (s, 2H).  **$^{13}\text{C}$  NMR** (100 MHz,  $\text{DMSO-d}_6$ )  $\delta_{\text{C}}$  193.35, 167.65, 166.35, 133.68, 133.59, 132.97, 132.90, 129.57, 128.84, 128.51, 127.27, 45.56.

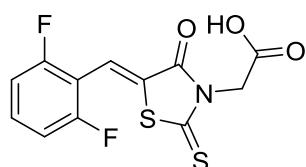

**(5-(2,6-Difluorobenzylidene)-4-oxo-2-thioxothiazolidin-3-yl)acetic acid 3p:** isolated as an orange solid (79%). **mp** 238-240 °C.  $R_f = 0.55$  ( $\text{CH}_2\text{Cl}_2$  : MeOH, 9 : 1). **IR**  $\nu_{\text{max}}$  (ATR)/ $\text{cm}^{-1}$ : 2924 (COO-H), 1700 (HOC=O), 1575 (NC=O), 1438 (SC=C). **HRMS** (ESI-): calculated for  $\text{C}_{12}\text{H}_6\text{F}_2\text{NO}_3\text{S}_2$  [ $\text{M} - \text{H}$ ] $^-$  requires 313.9763; found 313.9760.  **$^1\text{H}$  NMR** (400 MHz,  $\text{DMSO-d}_6$ )  $\delta_{\text{H}}$  7.71 (s, 1H), 7.66 (ddd,  $J = 8.5, 6.5, 2.0$  Hz, 1H), 7.30 (t,  $J = 9.0$  Hz, 2H).  **$^{13}\text{C}$  NMR** (100 MHz,  $\text{DMSO-d}_6$ )  $\delta_{\text{C}}$  193.58, 167.74, 166.32, 159.98 (d,  $J = 253.0$  Hz), 158.60 (d,  $J = 252.5$  Hz), 134.55 (t,  $J = 11.0$  Hz), 128.64, 121.09, 113.37-112.76 (m), 110.69 (t,  $J = 17.5$  Hz), 45.92.

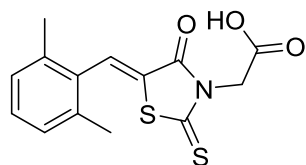

**(5-(2,6-Dimethylbenzylidene)-4-oxo-2-thioxothiazolidin-3-yl)acetic acid 3q:**

isolated as a pale yellow solid (82%). **mp** 240-242 °C. **R<sub>f</sub>** = 0.55 (CH<sub>2</sub>Cl<sub>2</sub> : MeOH, 9 : 1). **IR**  $\nu_{\max}$  (ATR)/cm<sup>-1</sup>: 2932 (COO-H), 1710 (HOC=O), 1588 (NC=O), 1449 (SC=C). **HRMS** (ESI<sup>-</sup>): calculated for C<sub>14</sub>H<sub>12</sub>NO<sub>3</sub>S<sub>2</sub> [M - H]<sup>-</sup> requires 306.0264; found 306.0261. **<sup>1</sup>H NMR** (400 MHz, DMSO-*d*<sub>6</sub>)  $\delta_{\text{H}}$  13.53 (br s, 1H), 8.03 (s, 1H), 7.25 (m, 1H), 7.14 (d, *J* = 7.5 Hz, 2H), 4.73 (s, 2H), 2.22 (s, 6H). **<sup>13</sup>C NMR** (100 MHz, DMSO-*d*<sub>6</sub>)  $\delta_{\text{C}}$  194.17, 167.79, 165.13, 135.69, 135.63, 133.39, 129.64, 129.03, 128.33, 45.54, 20.17.

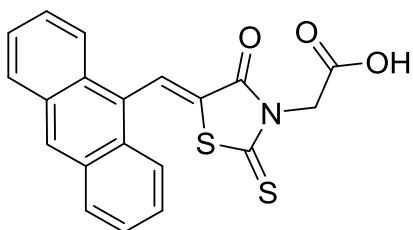

**2-(5-(anthracen-9-ylmethylene)-4-oxo-2-thioxothiazolidin-3-yl)acetic acid 3r:**

isolated as an orange solid (90%). **mp** 240-242 °C. **R<sub>f</sub>** = 0.55 (CH<sub>2</sub>Cl<sub>2</sub> : MeOH, 9 : 1). **IR**  $\nu_{\max}$  (ATR)/cm<sup>-1</sup>: 2967 (COO-H), 1707 (HOC=O), 1611(NC=O), 1401 (SC=C). **<sup>1</sup>H NMR** (400 MHz, DMSO-*d*<sub>6</sub>)  $\delta_{\text{H}}$  8.81 (s, 2 H), 8.22 (d, *J*=7.65 Hz, 2 H), 8.05 (d, *J*=8.55 Hz, 2 H), 7.59 - 7.71 (m, 5 H), 4.74 (s, 2 H) ppm. **<sup>13</sup>C NMR** (101 MHz, DMSO-*d*<sub>6</sub>)  $\delta_{\text{C}}$  194.0, 167.8, 132.3, 131.5, 131.2, 129.7, 128.5, 127.9, 127.4, 126.4, 125.4.

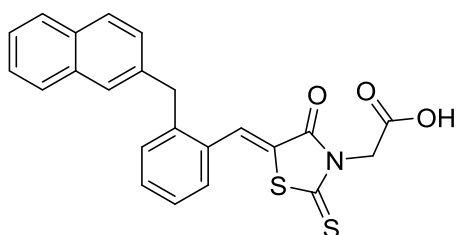

**2-(5-(2-(naphthalen-2-ylmethyl)benzylidene)-4-oxo-2-**

**thioxothiazolidin-3-yl)acetic acid 3s:**

isolated as an off white solid (88%). **mp** 251-259 °C. **R<sub>f</sub>** = 0.55 (CH<sub>2</sub>Cl<sub>2</sub> : MeOH, 9 : 1). **IR**  $\nu_{\max}$  (ATR)/cm<sup>-1</sup>: 2899 (COO-H), 1721 (HOC=O), 1600 (NC=O), 1476 (SC=C). **HRMS** (ESI<sup>-</sup>): calculated for C<sub>23</sub>H<sub>16</sub>NO<sub>3</sub>S<sub>2</sub> [M - H]<sup>-</sup> requires 418.0577; found 418.0570. **<sup>1</sup>H NMR** (400 MHz, DMSO-*d*<sub>6</sub>)  $\delta_{\text{H}}$  13.46 (s, 1H), 8.09 (s, 1H), 7.88 - 7.74 (m, 3H), 7.64 - 7.26 (m, 8H), 4.69 (s, 2H), 4.36 (s, 2H). **<sup>13</sup>C NMR** (101 MHz, DMSO-*d*<sub>6</sub>)  $\delta_{\text{C}}$  193.55, 167.21, 165.85, 141.94, 137.69, 133.06, 131.96, 131.79, 131.62, 131.43, 131.28, 128.28, 128.12, 127.66, 127.48, 127.39, 127.15, 126.59, 126.22, 125.59, 123.80, 44.95.

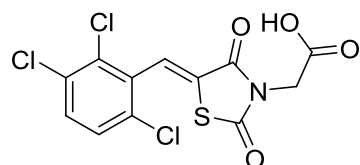

**2-(2,4-Dioxo-5-(2,3,6-trichlorobenzylidene)thiazolidin-3-yl)acetic acid 9:**

isolated as a pale yellow solid (82%). **mp** 150-153 °C. **R<sub>f</sub>** = 0.50 (CH<sub>2</sub>Cl<sub>2</sub> : MeOH, 9 : 1). **IR**  $\nu_{\max}$  (ATR)/cm<sup>-1</sup>: 2947 (COO-H), 1711 (HOC=O), 1600 (NC=O), 1458 (SC=C). **HRMS** (ESI<sup>+</sup>): calculated for C<sub>12</sub>H<sub>5</sub>Cl<sub>3</sub>NO<sub>4</sub>S [M - H]<sup>-</sup> requires 363.9010; found 363.9008. **<sup>1</sup>H NMR** (400 MHz, CD<sub>3</sub>OD)  $\delta_{\text{H}}$  7.85 (s, 1H), 7.64 (dd, *J* = 9.0, 0.7 Hz, 1H), 7.52 (d, *J* = 9.0 Hz, 1H), 4.33 (s, 2H). **<sup>13</sup>C NMR** (100 MHz, CD<sub>3</sub>OD)  $\delta_{\text{C}}$  169.69, 167.53, 165.25, 134.62, 133.46, 133.30, 133.20, 132.90, 132.24, 130.50, 130.02, 43.21.



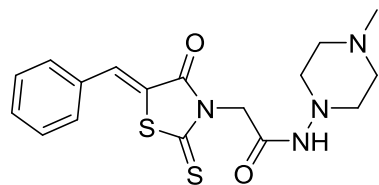

**(5-Benzylidene-4-oxo-2-thioxothiazolidin-3-yl)-N-(4-methylpiperazin-1-yl)acetamide 5a:** isolated as a yellow solid (35%). **mp** >255 °C (dec.). **R<sub>f</sub>** = 0.40 (CH<sub>2</sub>Cl<sub>2</sub> : MeOH, 9 : 1). **IR**  $\nu_{\max}$  (ATR)/cm<sup>-1</sup>: 3215 (NH), 1713 (HNC=O), 1671 (NC=O), 1597 (SC=C). **HRMS** (ESI<sup>+</sup>): calculated for C<sub>17</sub>H<sub>21</sub>N<sub>4</sub>O<sub>2</sub>S<sub>2</sub> [M + H]<sup>+</sup> requires 377.1100; found 377.1100. **<sup>1</sup>H NMR** (400 MHz, CDCl<sub>3</sub>)  $\delta_{\text{H}}$  7.76 (s, 1H), 7.53 – 7.41 (m, 5H), 4.94 (s, 2H), 3.61 – 3.39 (m, 5H), 1.69 (5H). **<sup>13</sup>C NMR** (100 MHz, CDCl<sub>3</sub>)  $\delta_{\text{C}}$  193.80, 167.58, 162.23, 133.71, 133.43, 130.85, 130.71, 129.42, 123.12, 46.18, 45.07, 43.63, 26.42, 25.48, 24.49.

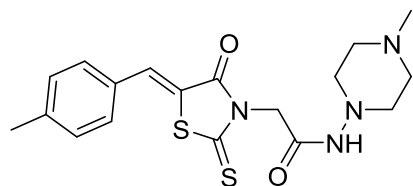

**(5-(4-Methylbenzylidene)-4-oxo-2-thioxothiazolidin-3-yl)-N-(4-methylpiperazin-1-yl)acetamide 5b:** isolated as a yellow solid (37%). **mp** >248 °C (dec.). **R<sub>f</sub>** = 0.40 (CH<sub>2</sub>Cl<sub>2</sub> : MeOH, 9 : 1). **IR**  $\nu_{\max}$  (ATR)/cm<sup>-1</sup>: 3209 (NH), 1712 (HNC=O), 1670 (NC=O), 1595 (SC=C). **HRMS** (ESI<sup>+</sup>): calculated for C<sub>18</sub>H<sub>23</sub>N<sub>4</sub>O<sub>2</sub>S<sub>2</sub> [M + H]<sup>+</sup> requires 391.1257; found 391.1256. **<sup>1</sup>H NMR** (600 MHz, DMSO-d<sub>6</sub>)  $\delta_{\text{H}}$  9.07 (s, 1H), 7.84 (s, 1H), 7.58 (d, *J* = 8.0 Hz, 2H), 7.40 (d, *J* = 8.0 Hz, 2H), 4.93 (s, 2H), 3.20-2.57 (m, 8H), 2.39 (s, 3H), 2.22 (s, 3H). **<sup>13</sup>C NMR** (150 MHz, DMSO-d<sub>6</sub>)  $\delta_{\text{C}}$  193.21, 167.03, 166.66, 141.70, 133.77, 133.59, 130.83, 130.78, 130.19, 129.29, 129.09, 54.97, 54.18, 45.18, 44.91, 21.16.

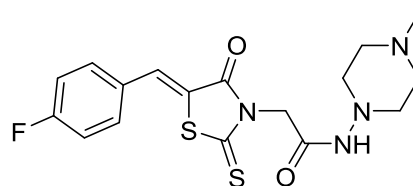

**(4-Fluorobenzylidene)-4-oxo-2-thioxothiazolidin-3-yl)-N-(4-methylpiperazin-1-yl)acetamide 5c:** isolated as an orange solid (35%). **mp** >266 °C (dec.). **R<sub>f</sub>** = 0.35 (CH<sub>2</sub>Cl<sub>2</sub> : MeOH, 9 : 1). **IR**  $\nu_{\max}$  (ATR)/cm<sup>-1</sup>: 3213 (NH), 1712 (HNC=O), 1669 (NC=O), 1585 (SC=C).

**HRMS** (ESI<sup>+</sup>): calculated for C<sub>17</sub>H<sub>20</sub>FN<sub>4</sub>O<sub>2</sub>S<sub>2</sub> [M + H]<sup>+</sup> requires 395.1006; found 395.1004. **<sup>1</sup>H NMR** (600 MHz, DMSO-d<sub>6</sub>)  $\delta_{\text{H}}$  9.06 (s, 1H), 7.89 (s, 1H), 7.79-7.75 (m, 2H), 7.46-7.40 (m, 2H), 4.93 (s, 2H), 3.12-2.30 (m, 8H), 2.18 (s, 3H). **<sup>13</sup>C NMR** (150 MHz, DMSO-d<sub>6</sub>)  $\delta_{\text{C}}$  193.83, 167.08, 166.56, 162.56 (d, *J* = 105.0 Hz), 133.73 (d, *J* = 9.0 Hz), 132.84, 130.11, 122.42 (d, *J* = 2.5 Hz), 117.25 (d, *J* = 22.0 Hz), 55.64, 54.80, 45.87, 45.45.

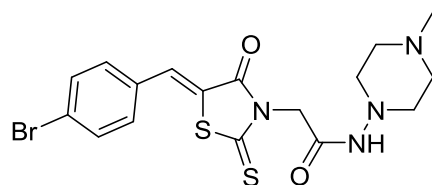

**(5-(4-Bromobenzylidene)-4-oxo-2-thioxothiazolidin-3-yl)-N-(4-methylpiperazin-1-yl)acetamide 5d:** isolated as a pale yellow solid (36%). **mp** >267 °C (dec.). **R<sub>f</sub>** = 0.35 (CH<sub>2</sub>Cl<sub>2</sub> : MeOH, 9 : 1). **IR**  $\nu_{\max}$  (ATR)/cm<sup>-1</sup>: 3212 (NH), 1712 (HNC=O), 1670 (NC=O), 1598 (SC=C).

**HRMS** (ESI<sup>+</sup>): calculated for C<sub>17</sub>H<sub>20</sub>BrN<sub>4</sub>O<sub>2</sub>S<sub>2</sub> [M + H]<sup>+</sup> requires 455.0206; found 455.0202. **<sup>1</sup>H NMR** (600 MHz, CDCl<sub>3</sub>)  $\delta_{\text{H}}$  7.69 (s, 1H), 7.62 (d, *J* = 8.5 Hz, 2H), 7.37 (d, *J* = 8.5 Hz, 2H), 6.36 (s, 1H), 5.08 (s, 2H), 3.27 – 2.55 (m, 8H), 2.32 (s, 3H). **<sup>13</sup>C NMR** (150 MHz, CDCl<sub>3</sub>)  $\delta_{\text{C}}$  193.10, 167.54, 166.99, 132.82, 132.36, 132.25, 131.94, 125.61, 123.99, 56.56, 54.62, 45.77, 45.05.

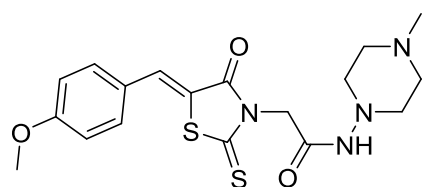

**(5-(4-Methoxybenzylidene)-4-oxo-2-thioxothiazolidin-3-yl)-N-(4-methylpiperazin-1-yl)acetamide 5e:** isolated as a yellow solid (31%). **mp** >253 °C (dec.). **R<sub>f</sub>** = 0.35 (CH<sub>2</sub>Cl<sub>2</sub> : MeOH, 9 : 1). **IR**  $\nu_{\max}$  (ATR)/cm<sup>-1</sup>: 3215 (NH), 1708 (HNC=O), 1667 (NC=O), 1583 (SC=C).

**HRMS** (ESI<sup>+</sup>): calculated for C<sub>18</sub>H<sub>23</sub>N<sub>4</sub>O<sub>3</sub>S<sub>2</sub> [M + H]<sup>+</sup> requires 407.1206; found 407.1201. **<sup>1</sup>H NMR** (600 MHz, CD<sub>2</sub>Cl<sub>2</sub>)  $\delta_{\text{H}}$  7.71 (s, 1H), 7.49 (d, *J* = 9.0 Hz, 2H), 7.01 (d, *J* = 9.0 Hz, 2H), 5.03 (s, 2H), 3.86 (s, 3H), 3.11-2.58 (m, 8H), 2.24 (s, 3H). **<sup>13</sup>C NMR** (150 MHz, CD<sub>2</sub>Cl<sub>2</sub>)  $\delta_{\text{C}}$  194.34, 168.03, 167.38, 162.43, 134.06, 133.29, 126.51, 120.37, 115.44, 56.65, 56.10, 55.09, 45.96, 45.53.

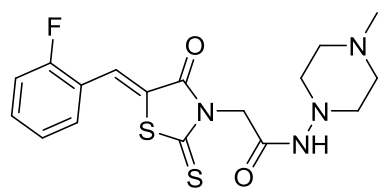

**(5-(2-Fluorobenzylidene)-4-oxo-2-thioxothiazolidin-3-yl)-N-(4-methylpiperazin-1-yl)acetamide 5f:** isolated as an orange solid (31%). **mp** >269 °C (dec.). **R<sub>f</sub>** = 0.35 (CH<sub>2</sub>Cl<sub>2</sub> : MeOH, 9 : 1). **IR**  $\nu_{\max}$  (ATR)/cm<sup>-1</sup>: 3211 (NH), 1717 (HNC=O), 1670 (NC=O), 1605 (SC=C). **HRMS** (ESI<sup>+</sup>):

calculated for C<sub>17</sub>H<sub>20</sub>FN<sub>4</sub>O<sub>2</sub>S<sub>2</sub> [M + H]<sup>+</sup> requires 395.1006; found 395.1003. **<sup>1</sup>H NMR** (600 MHz, DMSO-d<sub>6</sub>)  $\delta_{\text{H}}$  9.13 (s, 1H), 7.81 (s, 1H), 7.61 (ddt, *J* = 10.5, 6.0, 1.5 Hz, 2H), 7.42 (td, *J* = 8.5, 8.0, 3.0 Hz, 2H), 4.95 (s, 2H), 3.06-2.57 (m, 8H), 2.27 (s, 3H). **<sup>13</sup>C NMR** (150 MHz, DMSO-d<sub>6</sub>)  $\delta_{\text{C}}$  193.22, 167.30, 166.08, 160.63 (d, *J* = 253.0 Hz), 133.52 (d, *J* = 9.0 Hz), 129.69, 125.68, 124.84 (d, *J* = 10.5 Hz), 124.42 (d, *J* = 6.0 Hz), 120.75 (d, *J* = 12.0 Hz), 116.38 (d, *J* = 21.5 Hz), 54.58, 53.84, 46.28, 45.01.

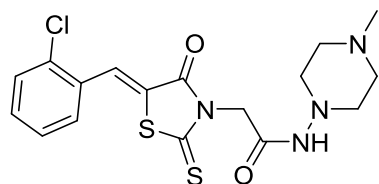

**(5-(2-Chlorobenzylidene)-4-oxo-2-thioxothiazolidin-3-yl)-N-(4-methylpiperazin-1-yl)acetamide 5g:** isolated as a yellow solid (36%). **mp** >267 °C (dec.). **R<sub>f</sub>** = 0.35 (CH<sub>2</sub>Cl<sub>2</sub> : MeOH, 9 : 1). **IR**  $\nu_{\max}$  (ATR)/cm<sup>-1</sup>: 3219 (NH), 1721 (HNC=O), 1672 (NC=O), 1600 (SC=C). **HRMS** (ESI<sup>+</sup>):

calculated for C<sub>17</sub>H<sub>20</sub>ClN<sub>4</sub>O<sub>2</sub>S<sub>2</sub> [M + H]<sup>+</sup> requires 411.0711; found 411.0707. **<sup>1</sup>H NMR** (600 MHz, DMSO-d<sub>6</sub>)  $\delta_{\text{H}}$  9.10 (s, 1H), 7.96 (s, 1H), 7.71-7.66 (m, 1H), 7.65-7.60 (m, 1H), 7.59-7.53 (m, 2H), 4.94 (s, 2H), 3.01-2.63 (m, 8H), 2.21 (s, 3H). **<sup>13</sup>C NMR** (150 MHz, DMSO-d<sub>6</sub>)  $\delta_{\text{C}}$  193.78, 166.79, 166.51, 135.27, 132.95, 131.24, 130.99, 129.99, 128.87, 128.58, 126.27, 55.49, 54.68, 45.70, 45.49.

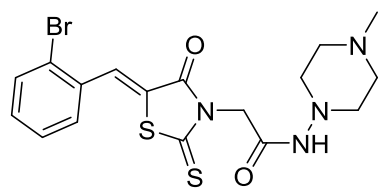

**(5-(2-Bromobenzylidene)-4-oxo-2-thioxothiazolidin-3-yl)-N-(4-methylpiperazin-1-yl)acetamide 5h:** isolated as a pale yellow solid (32%). **mp** >259 °C (dec.). **R<sub>f</sub>** = 0.40 (CH<sub>2</sub>Cl<sub>2</sub> : MeOH, 9 : 1). **IR**  $\nu_{\max}$  (ATR)/cm<sup>-1</sup>: 3210 (NH), 1710 (HNC=O), 1659 (NC=O), 1591 (SC=C). **HRMS** (ESI<sup>+</sup>):

calculated for C<sub>17</sub>H<sub>20</sub>BrN<sub>4</sub>O<sub>2</sub>S<sub>2</sub> [M + H]<sup>+</sup> requires 455.0206; found 455.0204. **<sup>1</sup>H NMR** (600 MHz, DMSO-d<sub>6</sub>)  $\delta_{\text{H}}$  9.64 (s, 0H), 7.66 (d, *J* = 5.0 Hz, 1H), 7.60 (d, *J* = 7.4 Hz, 1H), 7.40 – 7.31 (m, 2H), 7.22 (d, *J* = 6.6

Hz, 1H), 4.77 (s, 1H), 3.46 – 2.62 (m, 11H), 2.26 (s, 2H).  $^{13}\text{C}$  NMR (150 MHz, DMSO- $d_6$ )  $\delta_{\text{C}}$  193.32, 166.18, 162.07, 133.74, 132.37, 130.85, 129.55, 128.85, 125.84, 125.67, 125.62, 51.92, 50.66, 45.30, 44.83.

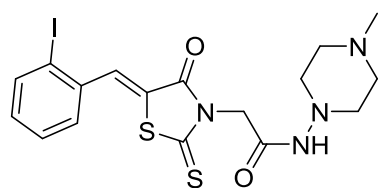

**(5-(2-Iodobenzylidene)-4-oxo-2-thioxothiazolidin-3-yl)-N-(4-methylpiperazin-1-yl)acetamide 5i:** isolated as a yellow solid (39%). mp >250 °C (dec.).  $R_f$  = 0.40 (CH<sub>2</sub>Cl<sub>2</sub> : MeOH, 9 : 1). IR  $\nu_{\text{max}}$  (ATR)/cm<sup>-1</sup>: 3215 (NH), 1711 (HNC=O), 1672 (NC=O), 1592 (SC=C). HRMS (ESI+):

calculated for C<sub>17</sub>H<sub>20</sub>IN<sub>4</sub>O<sub>2</sub>S<sub>2</sub> [M + H]<sup>+</sup> requires 503.0067; found 503.0062.  $^1\text{H}$  NMR (600 MHz, DMSO- $d_6$ )  $\delta_{\text{H}}$  9.08 (s, 1H), 8.08 (t,  $J$  = 7.5 Hz, 1H), 7.76 (s, 1H), 7.64-7.51 (m, 1H), 7.26 (m, 2H), 4.94 (s, 2H), 3.02-2.58 (m, 8H), 2.18 (s, 3H).  $^{13}\text{C}$  NMR (150 MHz, DMSO- $d_6$ )  $\delta_{\text{C}}$  193.70, 166.83, 166.53, 140.68, 136.43, 135.35, 132.60, 129.81, 129.39, 126.64, 103.69, 55.63, 54.79, 45.86, 45.49.

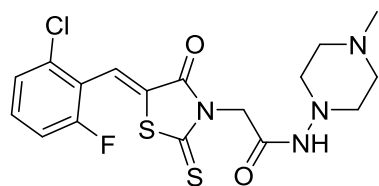

**(5-(2-Chloro-6-fluorobenzylidene)-4-oxo-2-thioxothiazolidin-3-yl)-N-(4-methylpiperazin-1-yl)acetamide 5j:** isolated as a yellow solid (35%). mp >261 °C (dec.).  $R_f$  = 0.35 (CH<sub>2</sub>Cl<sub>2</sub> : MeOH, 9 : 1). IR  $\nu_{\text{max}}$  (ATR)/cm<sup>-1</sup>: 3211 (NH), 1723 (HNC=O), 1675 (NC=O), 1599 (SC=C). HRMS (ESI+):

calculated for C<sub>17</sub>H<sub>19</sub>ClFN<sub>4</sub>O<sub>2</sub>S<sub>2</sub> [M + H]<sup>+</sup> requires 429.0616; found 429.0610.  $^1\text{H}$  NMR (600 MHz, DMSO- $d_6$ )  $\delta_{\text{H}}$  9.09 (s, 1H), 7.78 (s, 1H), 7.59-7.65 (m, 1H), 7.54 (d,  $J$  = 8.0 Hz, 1H), 7.45 (t,  $J$  = 9.0 Hz, 1H), 4.92 (s, 2H), 2.91 (br s, 4H), 2.71 (br s, 4H), 2.18 (s, 3H).  $^{13}\text{C}$  NMR (150 MHz, DMSO- $d_6$ )  $\delta_{\text{C}}$  193.16 (d,  $J$  = 6.2 Hz), 166.03, 165.74, 160.75 (d,  $J$  = 287.4 Hz), 134.27 (d,  $J$  = 5.0 Hz), 133.32 (d,  $J$  = 10.1 Hz), 129.67, 126.37 (d,  $J$  = 3.1 Hz), 124.26, 119.88 (d,  $J$  = 18.0 Hz), 115.50 (d,  $J$  = 22.1 Hz), 55.13, 54.28, 45.35, 45.13.

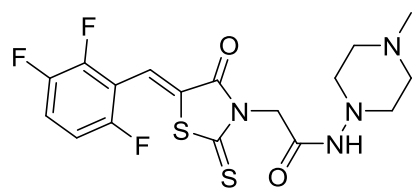

**(4-Methylpiperazin-1-yl)-2-(4-oxo-2-thioxo-5-(2,3,6-trifluorobenzylidene)thiazolidin-3-yl)acetamide 5k:** isolated as an orange solid (35%). mp >259 °C (dec.).  $R_f$  = 0.35 (CH<sub>2</sub>Cl<sub>2</sub> : MeOH, 9 : 1). IR  $\nu_{\text{max}}$  (ATR)/cm<sup>-1</sup>: 3209 (NH), 1717 (HNC=O), 1668 (NC=O), 1596

(SC=C). HRMS (ESI+): calculated for C<sub>17</sub>H<sub>18</sub>F<sub>3</sub>N<sub>4</sub>O<sub>2</sub>S<sub>2</sub> [M + H]<sup>+</sup> requires 431.0818; found 431.0815.  $^1\text{H}$  NMR (600 MHz, DMSO- $d_6$ )  $\delta_{\text{H}}$  9.10 (s, 1H), 7.75 (qd,  $J$  = 9.5, 5.0 Hz, 1H), 7.68 (s, 1H), 7.37 (tdd,  $J$  = 9.5, 4.0, 2.0 Hz, 1H), 4.93 (s, 2H), 3.00-2.33 (m, 8H), 2.19 (s, 3H).  $^{13}\text{C}$  NMR (150 MHz, DMSO- $d_6$ )  $\delta_{\text{C}}$  193.56, 166.46, 162.15, 157.08-154.13 (m), 147.49 (ddd,  $J$  = 254.5, 15.5, 7.5 Hz), 147.12 (ddd,  $J$  = 243.5, 12.5, 3.5 Hz), 130.31, 120.80 (dd,  $J$  = 19.5, 10.5 Hz), 119.85, 112.91 (ddd,  $J$  = 24.0, 7.0, 4.0 Hz), 112.63 (dd,  $J$  = 20.0, 14.0 Hz), 55.56, 54.74, 45.78, 45.65.

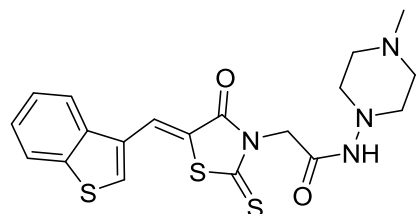

**5-(Benzo[b]thiophen-3-ylmethylene)-4-oxo-2-thioxothiazolidin-3-yl)-N-(4-methylpiperazin-1-yl)acetamide 5l:** isolated as a yellow solid (31%). **mp** >271 °C (dec.). **R<sub>f</sub>** = 0.40 (CH<sub>2</sub>Cl<sub>2</sub> : MeOH, 9 : 1). **IR**  $\nu_{\max}$  (ATR)/cm<sup>-1</sup>: 3216 (NH), 1708 (HNC=O), 1674 (NC=O), 1598 (SC=C).

**HRMS** (ESI<sup>+</sup>): calculated for C<sub>19</sub>H<sub>21</sub>N<sub>4</sub>O<sub>2</sub>S<sub>3</sub> [M + H]<sup>+</sup> requires 433.0821; found 433.0815. **<sup>1</sup>H NMR** (600 MHz, DMSO-d<sub>6</sub>)  $\delta_{\text{H}}$  9.08 (s, 1H), 8.28 (s, 1H), 8.24-8.20 (m, 1H), 8.16-8.12 (m, 1H), 8.11 (s, 1H), 7.58-7.50 (m, 2H), 4.96 (s, 2H), 3.04-2.59 (m, 8H), 2.20 (s, 3H). **<sup>13</sup>C NMR** (150 MHz, DMSO-d<sub>6</sub>)  $\delta_{\text{C}}$  193.66, 166.81, 166.63, 139.61, 138.09, 133.19, 129.68, 126.23, 125.93, 123.82, 123.74, 123.69, 122.30, 55.57, 54.75, 45.81, 45.45.

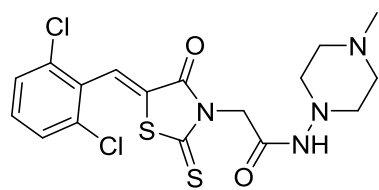

**(5-(2,6-Dichlorobenzylidene)-4-oxo-2-thioxothiazolidin-3-yl)-N-(4-methylpiperazin-1-yl)acetamide 5m:** isolated as a yellow solid (33%). **mp** >267 °C (dec.). **R<sub>f</sub>** = 0.35 (CH<sub>2</sub>Cl<sub>2</sub> : MeOH, 9 : 1). **IR**  $\nu_{\max}$  (ATR)/cm<sup>-1</sup>: 3220 (NH), 1723 (HNC=O), 1675 (NC=O), 1603 (SC=C). **HRMS** (ESI<sup>+</sup>):

calculated for C<sub>17</sub>H<sub>19</sub>Cl<sub>2</sub>N<sub>4</sub>O<sub>2</sub>S<sub>2</sub> [M + H]<sup>+</sup> requires 445.0321; found 445.0315. **<sup>1</sup>H NMR** (400 MHz, DMSO-d<sub>6</sub>)  $\delta_{\text{H}}$  9.38 (s, 1H), 7.83 (s, 1H), 7.65-7.60 (d, *J* = 7.5 Hz, 2H), 7.52 (t, *J* = 9.0 Hz, 1H), 4.98 (s, 2H), 3.41-2.86 (m, 8H), 2.68 (s, 3H). **<sup>13</sup>C NMR** (100 MHz, DMSO-d<sub>6</sub>)  $\delta_{\text{C}}$  193.47, 166.79, 165.68, 133.45, 132.72, 131.22, 129.41, 128.87, 120.67, 52.90, 51.53, 46.02, 45.49.

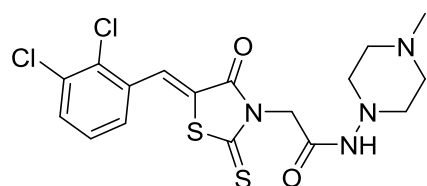

**(5-(2,3-Dichlorobenzylidene)-4-oxo-2-thioxothiazolidin-3-yl)-N-(4-methylpiperazin-1-yl)acetamide 5n:** isolated as a yellow solid (37%). **mp** >260 °C (dec.). **R<sub>f</sub>** = 0.35 (CH<sub>2</sub>Cl<sub>2</sub> : MeOH, 9 : 1). **IR**  $\nu_{\max}$  (ATR)/cm<sup>-1</sup>: 3225 (NH), 1720 (HNC=O), 1677 (NC=O), 1599 (SC=C).

**HRMS** (ESI<sup>+</sup>): calculated for C<sub>17</sub>H<sub>19</sub>Cl<sub>2</sub>N<sub>4</sub>O<sub>2</sub>S<sub>2</sub> [M + H]<sup>+</sup> requires 445.0321; found 445.0315. **<sup>1</sup>H NMR** (400 MHz, DMSO-d<sub>6</sub>)  $\delta_{\text{H}}$  9.41 (s, 1H), 7.83 (s, 1H), 7.70 (d, *J* = 8.5 Hz, 1H), 7.62 (dd, *J* = 8.5, 2.5 Hz, 1H), 7.56 (d, *J* = 2.5 Hz, 1H), 5.02 (s, 2H), 3.27-2.95 (m, 8H), 2.77 (s, 3H). **<sup>13</sup>C NMR** (100 MHz, DMSO-d<sub>6</sub>)  $\delta_{\text{C}}$  192.83, 166.11, 166.06, 162.20, 133.18, 132.72, 132.09, 131.95, 128.58, 127.62, 127.03, 120.72, 52.12, 50.77, 45.41, 44.95.

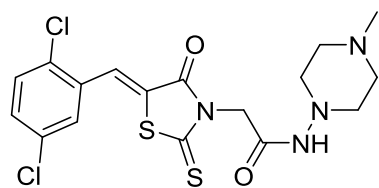

**(5-(2,5-Dichlorobenzylidene)-4-oxo-2-thioxothiazolidin-3-yl)-N-(4-methylpiperazin-1-yl)acetamide 5o:** isolated as a yellow solid (34%). **mp** >260 °C (dec.). **R<sub>f</sub>** = 0.35 (CH<sub>2</sub>Cl<sub>2</sub> : MeOH, 9 : 1). **IR**  $\nu_{\max}$  (ATR)/cm<sup>-1</sup>: 3220 (NH), 1723 (HNC=O), 1681 (NC=O), 1597 (SC=C).

**HRMS** (ESI<sup>+</sup>): calculated for C<sub>17</sub>H<sub>19</sub>Cl<sub>2</sub>N<sub>4</sub>O<sub>2</sub>S<sub>2</sub> [M + H]<sup>+</sup> requires 445.0321; found 445.0315. **<sup>1</sup>H NMR** (400 MHz, DMSO-d<sub>6</sub>)  $\delta_{\text{H}}$  9.41 (s, 1H), 7.91 (s, 1H), 7.79 (d, *J* = 7.0 Hz, 1H), 7.61-7.50 (m, 2H), 5.02 (s,

2H), 3.19-2.91 (m, 8H), 2.78 (s, 3H).  $^{13}\text{C}$  NMR (100 MHz, DMSO- $d_6$ )  $\delta_{\text{C}}$  193.62, 166.75, 166.64, 162.73, 133.67, 132.90, 129.62, 128.56, 128.50, 127.74, 127.59, 53.10, 52.65, 45.85, 45.36.

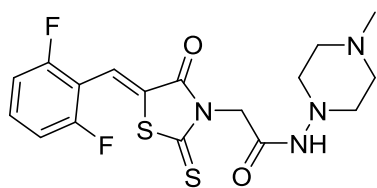

**(5-(2,6-Difluorobenzylidene)-4-oxo-2-thioxothiazolidin-3-yl)-N-(4-methylpiperazin-1-yl)acetamide 5p:** isolated as an orange solid (35%). **mp** >268 °C (dec.).  $R_f$  = 0.35 (CH<sub>2</sub>Cl<sub>2</sub> : MeOH, 9 : 1). **IR**  $\nu_{\text{max}}$  (ATR)/cm<sup>-1</sup>: 3229 (NH), 1731 (HNC=O), 1696 (NC=O), 1602(SC=C). **HRMS** (ESI+):

calculated for C<sub>17</sub>H<sub>19</sub>F<sub>2</sub>N<sub>4</sub>O<sub>2</sub>S<sub>2</sub> [M + H]<sup>+</sup> requires 413.0912; found 413.0907.  $^1\text{H}$  NMR (400 MHz, DMSO- $d_6$ )  $\delta_{\text{H}}$  9.87 (s, 1H), 7.72 (s, 1H), 7.71-7.62 (m, 1H), 7.32 (td,  $J$  = 9.0, 1.0 Hz, 2H), 4.99 (s, 2H), 3.49-2.89 (m, 8H), 2.69 (s, 3H).  $^{13}\text{C}$  NMR (100 MHz, DMSO- $d_6$ )  $\delta_{\text{C}}$  193.79, 166.81, 166.54, 160.67 (d,  $J$  = 393.0 Hz), 134.40, 129.03 (d,  $J$  = 19.0 Hz), 120.88 (d,  $J$  = 14.8 Hz), 113.03 (d,  $J$  = 24.5 Hz), 110.75, 52.53, 51.36, 45.95, 45.51.

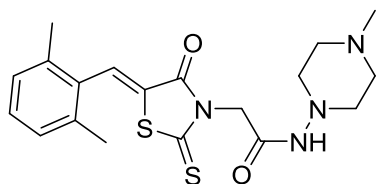

**(5-(2,6-Dimethylbenzylidene)-4-oxo-2-thioxothiazolidin-3-yl)-N-(4-methylpiperazin-1-yl)acetamide 5q:** isolated as a pale yellow solid (31%). **mp** >265 °C (dec.).  $R_f$  = 0.40 (CH<sub>2</sub>Cl<sub>2</sub> : MeOH, 9 : 1). **IR**  $\nu_{\text{max}}$  (ATR)/cm<sup>-1</sup>: 3218 (NH), 1715 (HNC=O), 1677 (NC=O), 1586 (SC=C). **HRMS** (ESI+):

calculated for C<sub>19</sub>H<sub>25</sub>N<sub>4</sub>O<sub>2</sub>S<sub>2</sub> [M + H]<sup>+</sup> requires 405.1413; found 405.1410.  $^1\text{H}$  NMR (400 MHz, DMSO- $d_6$ )  $\delta_{\text{H}}$  9.30 (s, 1H), 8.00 (s, 1H), 7.25 (t,  $J$  = 7.5 Hz, 1H), 7.15 (d,  $J$  = 7.5 Hz, 2H), 4.98 (s, 2H), 3.27-2.73 (m, 8H), 2.55 (s, 3H).  $^{13}\text{C}$  NMR (100 MHz, DMSO- $d_6$ )  $\delta_{\text{C}}$  194.43, 166.74, 165.40, 135.59, 135.08, 133.43, 129.53, 128.27, 120.66, 53.61, 52.93, 45.73, 45.32, 20.05.

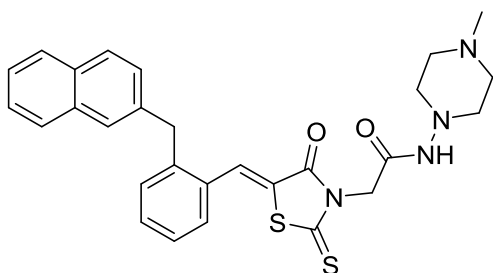

**N-(4-methylpiperazin-1-yl)-2-(5-(2-(naphthalen-2-ylmethyl)benzylidene)-4-oxo-2-thioxothiazolidin-3-yl)acetamide 5s:** isolated as a yellow solid (38%). **mp** >257 °C (dec.).  $R_f$  = 0.40 (CH<sub>2</sub>Cl<sub>2</sub> : MeOH, 9 : 1). **IR**  $\nu_{\text{max}}$  (ATR)/cm<sup>-1</sup>: 3228 (NH), 1726 (HNC=O), 1680 (NC=O), 1591 (SC=C). **HRMS** (ESI+):

calculated for C<sub>28</sub>H<sub>29</sub>N<sub>4</sub>O<sub>2</sub>S<sub>2</sub> [M + H]<sup>+</sup> requires 517.1732; found 517.1740.  $^1\text{H}$  NMR (400 MHz, DMSO- $d_6$ )  $\delta_{\text{H}}$  9.37 (s, 1H), 8.08 – 8.01 (m, 1H), 7.89 – 7.74 (m, 3H), 7.59 (d,  $J$  = 1.5 Hz, 1H), 7.54 – 7.41 (m, 6H), 7.32 (dd,  $J$  = 8.5, 1.5 Hz, 1H), 4.94 (s, 1H), 4.56 (s, 1H), 4.35 (s, 2H), 3.33 – 2.90 (m, 8H), 2.70 (s, 3H).  $^{13}\text{C}$  NMR (100 MHz, DMSO- $d_6$ )  $\delta_{\text{C}}$  194.19, 171.51, 162.68, 142.34, 138.16, 133.53, 132.45, 132.09, 131.94, 131.81, 131.67, 128.72, 128.60, 128.16, 127.97, 127.87, 127.61, 127.05, 126.71, 126.08, 124.64, 124.48, 52.03, 51.17, 50.04, 42.24.

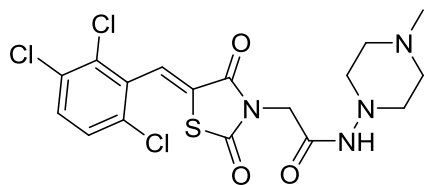

**2-(2,4-Dioxo-5-(2,3,6-trichlorobenzylidene)thiazolidin-3-yl)-N-(4-methylpiperazin-1-yl)acetamide 10:** isolated as a yellow solid (40%). **mp** >245 °C (dec.). **R<sub>f</sub>** = 0.35 (CH<sub>2</sub>Cl<sub>2</sub> : MeOH, 9 : 1). **IR**  $\nu_{\max}$  (ATR)/cm<sup>-1</sup>: 3220 (NH), 1712 (HNC=O), 1668 (NC=O), 1591 (SC=C).

**HRMS** (ESI<sup>+</sup>): calculated for C<sub>19</sub>H<sub>18</sub>Cl<sub>3</sub>N<sub>4</sub>O<sub>3</sub>S [M + H]<sup>+</sup> requires 463.0165; found 463.0173. **<sup>1</sup>H NMR** (400 MHz, CD<sub>3</sub>OD)  $\delta_{\text{H}}$  7.85 (s, 1H), 7.64 (d, *J* = 9.0 Hz, 1H), 7.52 (d, *J* = 9.0 Hz, 1H), 4.72 (s, 1H), 4.35 (s, 1H), 3.31 (s, 2H), 3.22 – 2.59 (m, 8H), 2.51 (s, 3H). **<sup>13</sup>C NMR** (101 MHz, CD<sub>3</sub>OD)  $\delta_{\text{C}}$  168.43, 166.49, 164.67, 133.38, 132.11, 131.96, 131.83, 131.58, 129.18, 128.64, 128.49, 54.00, 53.94, 53.52, 52.87, 43.42, 42.05.

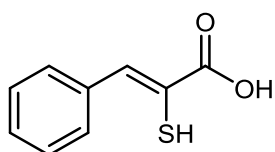

**Mercapto-3-phenylacrylic acid 6a:** isolated as off white crystals (79%). **mp** >300 °C. **IR**  $\nu_{\max}$  (ATR)/cm<sup>-1</sup>: 1574 (OC=O), 1387 (HSC=C). **HRMS** (ESI<sup>-</sup>): calculated for C<sub>9</sub>H<sub>7</sub>O<sub>2</sub>S [M - H]<sup>-</sup> requires 179.0172; found 179.0158. **<sup>1</sup>H NMR** (400 MHz, CD<sub>3</sub>OD)  $\delta_{\text{H}}$  7.81 (s, 1H), 7.72-7.58 (m, 2H), 7.49-7.41 (m, 2H), 7.39-7.31 (m, 1H). **<sup>13</sup>C NMR** (100 MHz, CD<sub>3</sub>OD)  $\delta_{\text{C}}$  166.77, 135.29, 134.12, 129.53, 128.46, 128.21, 123.67.

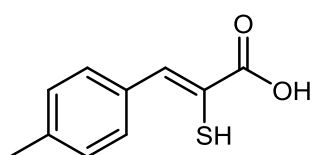

**Mercapto-3-(p-tolyl)acrylic acid 6b:** isolated as yellow crystals (77%). **mp** >300 °C. **IR**  $\nu_{\max}$  (ATR)/cm<sup>-1</sup>: 1615 (OC=O), 1378 (HSC=C). **HRMS** (ESI<sup>-</sup>): calculated for C<sub>10</sub>H<sub>9</sub>O<sub>2</sub>S [M - H]<sup>-</sup> requires 193.0329; found 193.0325. **<sup>1</sup>H NMR** (400 MHz, CD<sub>3</sub>OD)  $\delta_{\text{H}}$  7.66 (s, 1H), 7.45 (d, *J* = 8.0 Hz, 2H), 7.15 (d, *J* = 8.0 Hz, 2H), 2.26 (s, 3H). **<sup>13</sup>C NMR** (100 MHz, CD<sub>3</sub>OD)  $\delta_{\text{C}}$  166.89, 138.94, 134.20, 132.47, 129.64, 128.85, 122.35, 20.01.

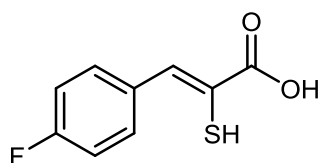

**(4-Fluorophenyl)-2-mercaptoacrylic acid 6c:** isolated as yellow crystals (82%). **mp** >300 °C. **IR**  $\nu_{\max}$  (ATR)/cm<sup>-1</sup>: 1601 (OC=O), 1364 (HSC=C). **HRMS** (ESI<sup>-</sup>): calculated for C<sub>9</sub>H<sub>6</sub>FO<sub>2</sub>S [M - H]<sup>-</sup> requires 197.0078; found 197.0075. **<sup>1</sup>H NMR** (400 MHz, CD<sub>3</sub>OD)  $\delta_{\text{H}}$  7.68 (s, 1H), 7.64-7.56 (m, 2H), 7.13-7.04 (m, 2H). **<sup>13</sup>C NMR** (100 MHz, CD<sub>3</sub>OD)  $\delta_{\text{C}}$  168.03, 163.92 (d, *J* = 249.0 Hz), 134.24, 133.08 (d, *J* = 8.5 Hz), 124.88, 116.51 (d, *J* = 22.0 Hz).

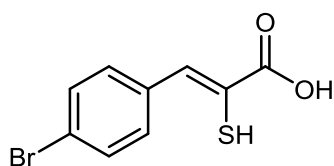

**(4-Bromophenyl)-2-mercaptoacrylic acid 6d:** isolated as yellow crystals (76%). **mp** >300 °C. **IR**  $\nu_{\max}$  (ATR)/cm<sup>-1</sup>: 1589 (OC=O), 1383 (HSC=C). **HRMS** (ESI<sup>-</sup>): calculated for C<sub>9</sub>H<sub>6</sub>BrO<sub>2</sub>S [M - H]<sup>-</sup> requires 256.9277; found 256.9281. **<sup>1</sup>H NMR** (400 MHz, CD<sub>3</sub>OD)  $\delta_{\text{H}}$  7.75 (s, 1H), 7.63-7.55 (m, 4H). **<sup>13</sup>C NMR** (100 MHz, CD<sub>3</sub>OD)  $\delta_{\text{C}}$  166.46, 134.38, 132.59, 131.40, 131.14, 124.82, 122.29.

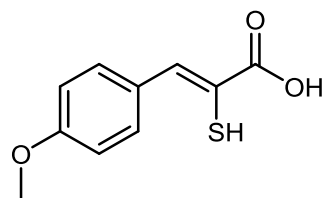

**Mercapto-3-(4-methoxyphenyl)acrylic acid 6e:** isolated as yellow crystals (81%). mp >300 °C. IR  $\nu_{\max}$  (ATR)/cm<sup>-1</sup>: 1589 (OC=O), 1389 (HSC=C). **HRMS** (ESI<sup>-</sup>): calculated for C<sub>9</sub>H<sub>9</sub>O<sub>3</sub>S [M - H]<sup>-</sup> requires 209.0278; found 209.0276. **<sup>1</sup>H NMR** (400 MHz, CD<sub>3</sub>OD)  $\delta_{\text{H}}$  7.78 (s, 1H), 7.66 (d, *J* = 9.0 Hz, 2H), 7.01 (d, *J* = 9.0 Hz, 1H), 3.85 (s, 3H). **<sup>13</sup>C NMR** (100 MHz, CD<sub>3</sub>OD)  $\delta_{\text{C}}$  167.07, 160.20, 134.14, 131.44, 127.78, 120.44, 113.63, 54.42.

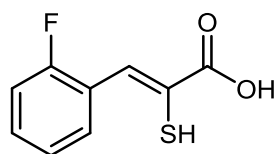

**(2-Fluorophenyl)-2-mercaptoacrylic acid 6f:** isolated as pale yellow crystals (76%). mp >300 °C. IR  $\nu_{\max}$  (ATR)/cm<sup>-1</sup>: 1619 (OC=O), 1330 (HSC=C). **HRMS** (ESI<sup>-</sup>): calculated for C<sub>9</sub>H<sub>6</sub>FO<sub>2</sub>S [M - H]<sup>-</sup> requires 197.0078; found 197.0081. **<sup>1</sup>H NMR** (400 MHz, CD<sub>3</sub>OD)  $\delta_{\text{H}}$  7.91 (s, 1H), 7.89 (dd, *J* = 8.0, 1.5 Hz, 1H), 7.45-7.36 (m, 1H), 7.28 (td, *J* = 7.5, 1.0 Hz, 1H), 7.18 (ddd, *J* = 10.5, 8.0, 1.0 Hz, 1H). **<sup>13</sup>C NMR** (100 MHz, CD<sub>3</sub>OD)  $\delta_{\text{C}}$  166.28, 160.40 (d, *J* = 250.5 Hz), 130.50 (d, *J* = 8.5 Hz), 129.18 (d, *J* = 2.5 Hz), 126.45, 125.37 (d, *J* = 6.5 Hz), 123.86 (d, *J* = 4.0 Hz), 123.17 (d, *J* = 12.5 Hz), 115.09 (d, *J* = 22.0 Hz).

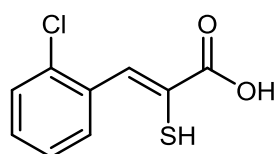

**(2-Chlorophenyl)-2-mercaptoacrylic acid 6g:** isolated as pale yellow crystals (81%). mp >300 °C. IR  $\nu_{\max}$  (ATR)/cm<sup>-1</sup>: 1588 (OC=O), 1360 (HSC=C). **HRMS** (ESI<sup>-</sup>): calculated for C<sub>9</sub>H<sub>6</sub>ClO<sub>2</sub>S [M - H]<sup>-</sup> requires 212.9783; found 212.9781. **<sup>1</sup>H NMR** (400 MHz, CD<sub>3</sub>OD)  $\delta_{\text{H}}$  7.84 (s, 1H), 7.72-7.61 (m, 1H), 7.38 (dd, *J* = 8.0, 1.5 Hz, 1H), 7.32-7.19 (m, 2H). **<sup>13</sup>C NMR** (100 MHz, CD<sub>3</sub>OD)  $\delta_{\text{C}}$  166.17, 133.80, 133.56, 130.42, 129.75, 129.47, 129.43, 127.04, 126.56.

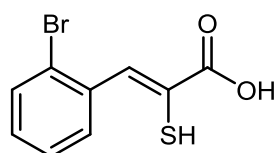

**(2-Bromophenyl)-2-mercaptoacrylic acid 6h:** isolated as pale yellow crystals (75%). mp >300 °C. IR  $\nu_{\max}$  (ATR)/cm<sup>-1</sup>: 1575 (OC=O), 1358 (HSC=C). **HRMS** (ESI<sup>-</sup>): calculated for C<sub>9</sub>H<sub>6</sub>BrO<sub>2</sub>S [M - H]<sup>-</sup> requires 256.9277; found 256.9280. **<sup>1</sup>H NMR** (400 MHz, CD<sub>3</sub>OD)  $\delta_{\text{H}}$  7.77 (s, 1H), 7.65 (dd, *J* = 7.8, 1.5 Hz, 1H), 7.58 (dd, *J* = 8.0, 1.0 Hz, 1H), 7.33 (td, *J* = 7.5, 1.0 Hz, 1H), 7.15 (td, *J* = 7.5, 1.5 Hz, 1H). **<sup>13</sup>C NMR** (100 MHz, CD<sub>3</sub>OD)  $\delta_{\text{C}}$  166.12, 135.44, 133.04, 132.73, 129.91, 129.59, 127.15, 126.97, 123.94.

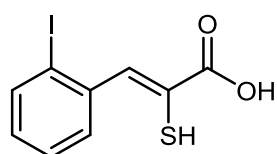

**(2-Iodophenyl)-2-mercaptoacrylic acid 6i:** isolated as light green crystals (78%). mp >300 °C. IR  $\nu_{\max}$  (ATR)/cm<sup>-1</sup>: 1577 (OC=O), 1385 (HSC=C). **HRMS** (ESI<sup>-</sup>): calculated for C<sub>9</sub>H<sub>6</sub>IO<sub>2</sub>S [M - H]<sup>-</sup> requires 304.9139; found 304.9143. **<sup>1</sup>H NMR** (400 MHz, CD<sub>3</sub>OD)  $\delta_{\text{H}}$  9.60 7.85 (dd, *J* = 8.0, 1.0 Hz, 1H), 7.63 (d, *J* = 1.0 Hz, 1H), 7.56 (dd, *J* = 8.0, 1.5 Hz, 1H), 7.35 (td, *J* = 7.5, 1.0 Hz, 1H), 6.97 (td, *J* = 7.5, 1.5 Hz, 1H). **<sup>13</sup>C NMR** (100 MHz, CD<sub>3</sub>OD)  $\delta_{\text{C}}$  166.06, 139.33, 139.08, 137.74, 129.82, 128.97, 127.90, 126.77, 99.35.

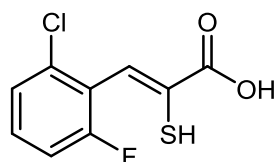

**(2-Chloro-6-fluorophenyl)-2-mercaptoacrylic acid 6j:** isolated as a white solid (81%). **mp** >300 °C. **IR**  $\nu_{\max}$  (ATR)/ $\text{cm}^{-1}$ : 1578 (OC=O), 1370 (HSC=C). **HRMS** (ESI<sup>-</sup>): calculated for  $\text{C}_9\text{H}_6\text{FCIO}_2\text{S}$  [ $\text{M} - \text{H}$ ]<sup>-</sup> requires 230.9688; found 230.9690.

**<sup>1</sup>H NMR** (400 MHz,  $\text{CD}_3\text{OD}$ )  $\delta_{\text{H}}$  7.53 (s, 1H), 7.40 (td,  $J = 8.0, 6.0$  Hz, 1H), 7.33 (d,  $J = 8.0$  Hz, 1H), 7.16 (t,  $J = 8.0$  Hz, 1H). **<sup>13</sup>C NMR** (100 MHz,  $\text{CD}_3\text{OD}$ )  $\delta_{\text{C}}$  165.26, 159.38 (d,  $J = 250.5$  Hz), 133.86 (d,  $J = 5.0$  Hz), 131.88, 130.52 (d,  $J = 9.5$  Hz), 126.02, 125.11 (d,  $J = 3.5$  Hz), 122.82 (d,  $J = 19.0$  Hz), 114.21 (d,  $J = 22.5$  Hz).

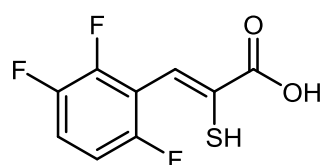

**Mercapto-3-(2,3,6-trifluorophenyl)acrylic acid 6k:** isolated as yellow crystals (79%). **mp** >300 °C. **IR**  $\nu_{\max}$  (ATR)/ $\text{cm}^{-1}$ : 1622 (OC=O), 1371 (HSC=C). **HRMS** (ESI<sup>-</sup>): calculated for  $\text{C}_9\text{H}_4\text{F}_3\text{O}_2\text{S}$  [ $\text{M} - \text{H}$ ]<sup>-</sup> requires 232.9890; found 232.9892. **<sup>1</sup>H NMR** (400 MHz,  $\text{CD}_3\text{OD}$ )  $\delta_{\text{H}}$  7.69 (s, 1H), 7.34 (ddt,  $J = 9.5, 5.0, 2.5$  Hz, 1H), 7.09 (dddd,  $J = 10.5, 8.0, 6.5, 3.0$  Hz, 1H). **<sup>13</sup>C NMR** (100 MHz,  $\text{CD}_3\text{OD}$ )  $\delta_{\text{C}}$  166.91, 160.15 (dd,  $J = 11.1, 3.4$  Hz), 148.08 – 147.28 (m), 145.95 – 144.50 (m), 131.33, 127.83 – 126.93 (m), 124.11, 111.66 (dd,  $J = 25.7, 3.6$  Hz), 106.68 (dd,  $J = 28.4, 21.6$  Hz).

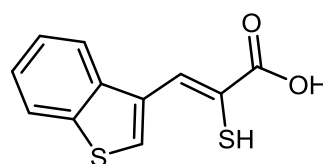

**(Benzo[b]thiophen-3-yl)-2-mercaptoacrylic acid 6l:** isolated as a yellow solid (75%). **mp** >300 °C. **IR**  $\nu_{\max}$  (ATR)/ $\text{cm}^{-1}$ : 1672 (OC=O), 1381 (HSC=C). **HRMS** (ESI<sup>-</sup>): calculated for  $\text{C}_{11}\text{H}_7\text{O}_2\text{S}$  [ $\text{M} - \text{H}$ ]<sup>-</sup> requires 234.9893; found 234.9893. **<sup>1</sup>H NMR** (400 MHz,  $\text{CD}_3\text{OD}$ )  $\delta_{\text{H}}$  9.60 (s, 1H), 7.95 (s, 1H), 7.92 (dd,  $J = 7.5$  Hz, 2H), 7.27-7.52 (m, 2H). **<sup>13</sup>C NMR** (100 MHz,  $\text{CD}_3\text{OD}$ )  $\delta_{\text{C}}$  169.03, 14.38, 139.63, 139.02, 134.70, 124.73, 124.46, 123.46, 123.30, 121.23, 115.15.

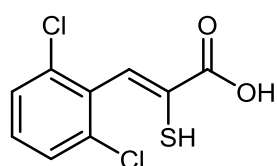

**(2,6-Dichlorophenyl)-2-mercaptoacrylic acid 6m:** isolated as yellow crystals (80%). **mp** >300 °C. **IR**  $\nu_{\max}$  (ATR)/ $\text{cm}^{-1}$ : 1593 (OC=O), 1368 (HSC=C). **HRMS** (ESI<sup>-</sup>): calculated for  $\text{C}_9\text{H}_6\text{Cl}_2\text{O}_2\text{S}$  [ $\text{M} - \text{H}$ ]<sup>-</sup> requires 246.9393; found 246.9392. **<sup>1</sup>H NMR** (400 MHz,  $\text{CD}_3\text{OD}$ )  $\delta_{\text{H}}$  7.44 (s, 1H), 7.39-7.32 (m, 2H), 7.28-7.20 (m, 1H).

**<sup>13</sup>C NMR** (100 MHz,  $\text{CD}_3\text{OD}$ )  $\delta_{\text{C}}$  165.23, 133.74, 133.36, 131.56, 130.08, 129.93, 128.00.

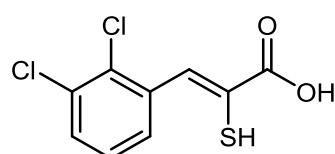

**(2,3-Dichlorophenyl)-2-mercaptoacrylic acid 6n:** isolated as yellow crystals (77%). **mp** >300 °C. **IR**  $\nu_{\max}$  (ATR)/ $\text{cm}^{-1}$ : 1594 (OC=O), 1364 (HSC=C). **HRMS** (ESI<sup>-</sup>): calculated for  $\text{C}_9\text{H}_5\text{Cl}_2\text{O}_2\text{S}$  [ $\text{M} - \text{H}$ ]<sup>-</sup> requires 246.9393; found



246.9394.  $^1\text{H NMR}$  (400 MHz,  $\text{CD}_3\text{OD}$ )  $\delta_{\text{H}}$  7.74 (s, 1H), 7.70 (d,  $J = 2.5$  Hz, 1H), 7.39 (d,  $J = 8.5$  Hz, 1H), 7.27 (dd,  $J = 8.5, 2.5$  Hz, 1H).  $^{13}\text{C NMR}$  (100 MHz,  $\text{CD}_3\text{OD}$ )  $\delta_{\text{C}}$  165.83, 135.22, 132.40, 132.18, 130.80, 129.45, 128.99, 128.88, 128.77.

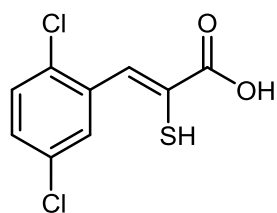

**(2,5-Dichlorophenyl)-2-mercaptoacrylic acid 6o:** isolated as yellow crystals (75%). **mp** >300 °C. **IR**  $\nu_{\text{max}}$  (ATR)/ $\text{cm}^{-1}$ : 1582 (OC=O), 1367 (HSC=C). **HRMS** (ESI $^-$ ): calculated for  $\text{C}_9\text{H}_6\text{Cl}_2\text{O}_2\text{S}$  [ $\text{M} - \text{H}$ ] $^-$  requires 246.9393; found 246.9393.  $^1\text{H NMR}$  (400 MHz,  $\text{CD}_3\text{OD}$ )  $\delta_{\text{H}}$  7.79 (s, 1H), 7.62 (dd,  $J = 8.0, 1.5$  Hz, 1H), 7.45 (dd,  $J = 8.0, 1.5$  Hz, 1H), 7.29 (t,  $J = 8.0$  Hz, 1H).  $^{13}\text{C NMR}$  (100 MHz,  $\text{CD}_3\text{OD}$ )  $\delta_{\text{C}}$  165.96, 136.08, 133.12, 131.51, 128.66, 127.86, 127.33.

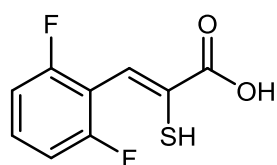

**(2,6-Difluorophenyl)-2-mercaptoacrylic acid 6p:** isolated as yellow crystals (82%). **mp** >300 °C. **IR**  $\nu_{\text{max}}$  (ATR)/ $\text{cm}^{-1}$ : 1580 (OC=O), 1355 (HSC=C). **HRMS** (ESI $^-$ ): calculated for  $\text{C}_9\text{H}_6\text{F}_2\text{O}_2\text{S}$  [ $\text{M} - \text{H}$ ] $^-$  requires 214.9984; found 214.9984.  $^1\text{H NMR}$  (400 MHz,  $\text{CD}_3\text{OD}$ )  $\delta_{\text{H}}$  7.43 (s, 1H), 7.34 (tt,  $J = 8.5, 6.5$  Hz, 1H), 6.94 (t,  $J = 8.0$  Hz, 2H).  $^{13}\text{C NMR}$  (100 MHz,  $\text{CD}_3\text{OD}$ )  $\delta_{\text{C}}$  165.35, 159.67 (d,  $J = 250.5$  Hz), 132.04, 130.75 (t,  $J = 10.5$  Hz), 122.21, 112.65 (m), 111.26 (m).

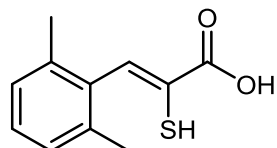

**(2,6-Dimethylphenyl)-2-mercaptoacrylic acid 6q:** isolated as pale yellow crystals (79%). **mp** >300 °C. **IR**  $\nu_{\text{max}}$  (ATR)/ $\text{cm}^{-1}$ : 1599 (OC=O), 1370 (HSC=C). **HRMS** (ESI $^-$ ): calculated for  $\text{C}_{11}\text{H}_{11}\text{O}_2\text{S}$  [ $\text{M} - \text{H}$ ] $^-$  requires 207.0485; found 207.0484.  $^1\text{H NMR}$  (400 MHz,  $\text{CD}_3\text{OD}$ )  $\delta_{\text{H}}$  7.60 (s, 1H), 7.04 (dd,  $J = 8.5, 6.5$  Hz, 1H), 6.97 (d,  $J = 7.0$  Hz, 2H), 2.10 (s, 6H).  $^{13}\text{C NMR}$  (100 MHz,  $\text{CD}_3\text{OD}$ )  $\delta_{\text{C}}$  165.84, 135.08, 134.95, 134.55, 128.49, 127.79, 127.29, 18.52.

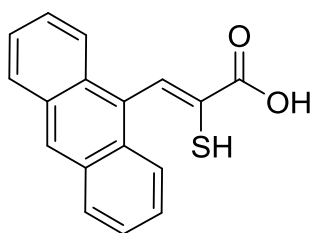

**3-(anthracen-9-yl)-2-mercaptoacrylic acid 6r:** isolated as yellow solid (33%). **mp** 252-254 °C. **IR**  $\nu_{\text{max}}$  (ATR)/ $\text{cm}^{-1}$ : 1676 (OC=O), 1223 (HSC=C). **HRMS** (ESI $^-$ ): calculated for  $\text{C}_{17}\text{H}_{12}\text{O}_2\text{NaS}$  [ $\text{M} + \text{Na}$ ] $^+$ : 303.0450, found: 303.0452.  $^1\text{H NMR}$  (400 MHz,  $\text{CD}_3\text{OD}$ )  $\delta_{\text{H}}$  8.63 (s, 1 H), 8.29 (s, 1 H), 8.12 - 8.18 (m, 2 H), 7.95 - 8.02 (m, 2 H), 7.52 - 7.59 (m, 4 H).  $^{13}\text{C NMR}$  (100 MHz,  $\text{CD}_3\text{OD}$ )  $\delta_{\text{C}}$  180.7, 137.7, 132.9, 131.5, 129.2, 128.9, 128.3, 126.4, 126.0, 124.4.

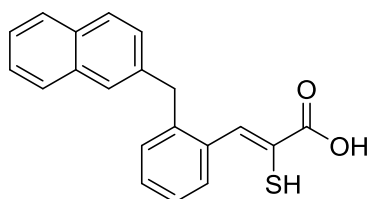

**2-mercapto-3-(2-(naphthalen-2-ylmethyl)phenyl)acrylic acid 6s:** isolated as white solid (). **mp** 250-256 °C. **IR**  $\nu_{\text{max}}$  (ATR)/ $\text{cm}^{-1}$ : 1690 (OC=O), 1245 (HSC=C). **HRMS** (ESI $^-$ ): calculated for  $\text{C}_{20}\text{H}_{15}\text{O}_2\text{S}$  [ $\text{M} - \text{H}$ ] $^-$ : 320.0871, found: 320.0866.  $^1\text{H NMR}$  (400 MHz,  $\text{CD}_3\text{OD}$ )  $\delta_{\text{H}}$  7.90 (s, 1H), 7.83 - 7.66

(m, 3H), 7.61 – 7.51 (m, 2H), 7.46 – 7.21 (m, 6H), 4.15 (s, 2H).  $^{13}\text{C}$  NMR (100 MHz,  $\text{CD}_3\text{OD}$ )  $\delta_{\text{C}}$  167.75, 140.98, 139.03, 136.34, 135.02, 134.91, 133.57, 131.66, 129.96, 129.64, 128.95, 128.54, 128.28, 128.07, 127.64, 127.53, 126.95, 126.36, 101.38, 40.63.

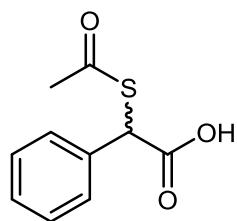

**2-(Acetylthio)-2-phenylacetic acid 12a:** isolated as an off white solid (80%). mp 136-139 °C.  $R_f$  = 0.45 ( $\text{C}_6\text{H}_{12}/\text{EtOAc}$  6:4). IR  $\nu_{\text{max}}$  (ATR)/ $\text{cm}^{-1}$ : 2946 (COO-H), 1711 (HOC=O), 1650 (SC=O). HRMS (ESI+): calculated for  $\text{C}_{10}\text{H}_{10}\text{O}_3\text{SNa}$  [ $\text{M} + \text{Na}$ ] $^+$  requires 233.0243; found 233.0244.  $^1\text{H}$  NMR(400 MHz,  $\text{DMSO-d}_6$ )  $\delta_{\text{H}}$  13.16 (br., s, 1H), 7.57-7.11 (m, 5H), 5.20 (s, 1H), 2.36 (s, 3H).  $^{13}\text{C}$  NMR (100 MHz,  $\text{DMSO-d}_6$ )  $\delta_{\text{C}}$  194.40, 170.98, 135.90, 129.29, 128.69, 51.41, 30.36.

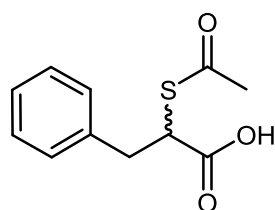

**2-(Acetylthio)-3-phenylpropanoic acid 12b:** isolated as pale yellow oil (85%).  $R_f$  = 0.50 ( $\text{C}_6\text{H}_{12}/\text{EtOAc}$  6:4). IR  $\nu_{\text{max}}$  (ATR)/ $\text{cm}^{-1}$ : 295 (COO-H), 1710 (HOC=O), 1648 (SC=O). HRMS (ESI+): calculated for  $\text{C}_{11}\text{H}_{12}\text{O}_3\text{SNa}$  [ $\text{M} + \text{Na}$ ] $^+$  requires 247.0399; found 247.0400.  $^1\text{H}$  NMR(400 MHz,  $\text{DMSO-d}_6$ )  $\delta_{\text{H}}$  12.96 (s, 1H), 7.33-7.27 (m, 2H), 7.23 (td,  $J$  = 6.0, 1.5 Hz, 3H), 4.25 (t,  $J$  = 8.0, 1H), 3.18 (dd,  $J$  = 14.0, 8.0 Hz, 1H), 2.94 (dd,  $J$  = 14.0, 7.5 Hz, 1H), 2.33 (s, 3H).  $^{13}\text{C}$  NMR (100 MHz,  $\text{DMSO-d}_6$ )  $\delta_{\text{C}}$  193.97, 172.07, 138.05, 129.45, 128.78, 127.23, 47.46, 37.68, 30.66.

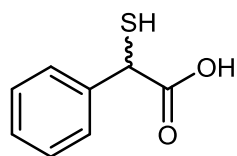

**2-Mercapto-2-phenylacetic acid 13a:** isolated as pale yellow oil (89%). IR  $\nu_{\text{max}}$  (ATR)/ $\text{cm}^{-1}$ : 2946 (COO-H), 1711 (HOC=O). HRMS (ESI+): calculated for  $\text{C}_8\text{H}_7\text{O}_2\text{S}$  [ $\text{M} - \text{H}$ ] $^-$  requires 167.0172; found 167.0163.  $^1\text{H}$  NMR(400 MHz,  $\text{DMSO-d}_6$ )  $\delta_{\text{H}}$  13.00 (br., s, 1H), 7.47-7.25 (m, 5H), 4.80 (d,  $J$  = 7.5 Hz, 1H), 3.52 (d,  $J$  = 7.5 Hz, 1H).  $^{13}\text{C}$  NMR (100 MHz,  $\text{DMSO-d}_6$ )  $\delta_{\text{C}}$  172.92, 140.00, 128.89, 128.31, 128.06, 45.44.

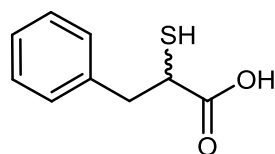

**2-Mercapto-3-phenylpropanoic acid 13b:** isolated as pale yellow oil (92%). IR  $\nu_{\text{max}}$  (ATR)/ $\text{cm}^{-1}$ : 2952 (COO-H), 1719 (HOC=O). HRMS (ESI+): calculated for  $\text{C}_9\text{H}_9\text{O}_2\text{S}$  [ $\text{M} - \text{Na}$ ] $^-$  requires 181.0329; found 181.0325.  $^1\text{H}$  NMR(400 MHz,  $\text{DMSO-d}_6$ )  $\delta_{\text{H}}$  12.68 (s, 1H), 7.58-7.01 (m, 5H), 3.62 (td,  $J$  = 9.0, 6.5 Hz, 1H), 3.13 (dd,  $J$  = 14.0, 8.5 Hz, 1H), 3.12 (d,  $J$  = 9.0 Hz, 1H), 2.91 (dd,  $J$  = 14.0, 6.5 Hz, 1H).  $^{13}\text{C}$  NMR (100 MHz,  $\text{DMSO-d}_6$ )  $\delta_{\text{C}}$  174.16, 138.81, 129.49, 128.69, 127.00, 41.92, 41.45.

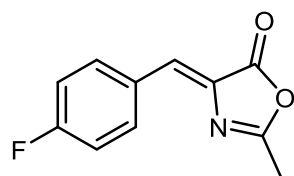

**4-(4-Fluorobenzylidene)-2-methyloxazol-5(4H)-one 16:** isolated as a yellow solid (65%). mp 147-150 °C (from *i*PrOH).  $R_f$  = 0.35 (7 : 3, hexane : EtOAc). IR,  $\nu_{\text{max}}$  (ATR)/ $\text{cm}^{-1}$ : 2360 (s), 2341 (s), 1802 (s), 1773 (s), 1661 (s), 1630 (s), 1595

(s), 1586 (s), 1445 (s), 1427 (s), 1392 (s), 1232 (s), 1161 (s). **HRMS** (ESI<sup>+</sup>): calculated for C<sub>11</sub>H<sub>9</sub>O<sub>2</sub>NF [M + H]<sup>+</sup> requires 206.06118; found: 206.06137. **<sup>1</sup>H NMR** (400 MHz, CDCl<sub>3</sub>): δ<sub>H</sub> 8.12-8.09 (2H, m, CH ar.), 7.15-7.11 (2H, m, CH ar.), 7.13 (1H, s, =CH), 2.41 (3H, s, CH<sub>3</sub>). **<sup>13</sup>C NMR** (100 MHz, CDCl<sub>3</sub>): δ<sub>C</sub> 167.85, 166.35, 165.62, 163.09, 134.52 (d, *J* = 9.0 Hz), 132.30, 130.17, 129.66 (d, *J* = 3.0 Hz), 116.30 (d, *J* = 22.0 Hz), 15.83. **<sup>19</sup>F NMR** (376 MHz, CDCl<sub>3</sub>): δ<sub>F</sub> -106.87 (*Far.*).

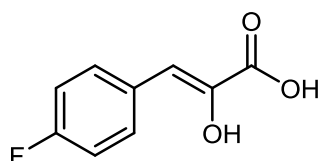

**3-(4-Fluorophenyl)-2-hydroxyacrylic acid 17**: isolated as a white solid (90%).

**mp** 174-178 °C. **IR**,  $\nu_{\max}$  (ATR)/cm<sup>-1</sup>: 2360 (s), 2341 (s), 1733 (w), 1717 (w), 1646 (w), 1603 (w), 1238 (w), 1144 (w). **HRMS** (ESI<sup>-</sup>): calculated for C<sub>9</sub>H<sub>6</sub>O<sub>3</sub>F [M - H]<sup>-</sup> requires 181.03065; found: 181.03047. **<sup>1</sup>H NMR** (400 MHz, CD<sub>3</sub>OD): δ<sub>H</sub> 7.84-7.81 (2H, m, CH ar.), 7.09-7.05 (2H, m, CH ar.), 6.50 (1H, s, =CH). **<sup>13</sup>C NMR** (100 MHz, CD<sub>3</sub>OD): δ<sub>C</sub> 168.20, 164.43, 161.99, 142.03 (d, *J* = 3.0 Hz), 132.84 (d, *J* = 3.0 Hz), 132.57 (d, *J* = 8.0 Hz), 115.97 (d, *J* = 21.0 Hz), 110.29. **<sup>19</sup>F NMR** (376 MHz, CD<sub>3</sub>OD): δ<sub>F</sub> -116.13 (*Far.*).

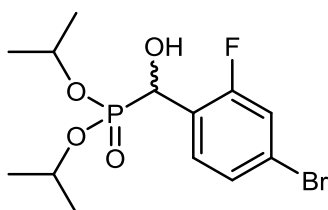

**Diisopropyl ((4-bromo-2-fluorophenyl)(hydroxy)methyl)phosphonate 20**:

isolated as a white solid (90%). **mp** 67-70 °C. *R<sub>f</sub>* = 0.25 (9.5 : 0.5, CHCl<sub>3</sub> : MeOH). **IR**,  $\nu_{\max}$  (ATR)/cm<sup>-1</sup>: 3226 (w), 2918 (s), 1468 (m), 1376 (w), 1191 (m, P=O), 1113 (m), 1041 (m, P-O-C), 844 and 802 (w, P-O-C), 722 (w, CH<sub>2</sub>). **HRMS** (ESI<sup>+</sup>): calculated for C<sub>13</sub>H<sub>19</sub>BrFO<sub>4</sub>PNa [M + Na]<sup>+</sup> requires 391.00806; found: 391.00800. **<sup>1</sup>H NMR** (400 MHz, CDCl<sub>3</sub>): δ<sub>H</sub> 7.57 (1H, tdd, *J* = 7.5, 2.5, 0.5 Hz, CH ar.), 7.35 (1H, ddt, *J* = 8.0, 2.0, 0.5 Hz, CH ar.), 7.25 (1H, ddd, *J* = 9.5, 2.0, 1.0 Hz, CH ar.), 5.26 (1H, dd, *J* = 11.5, 6.0 Hz, PCH), 4.72 (2H, dddt, *J* = 27.0, 12.0, 7.0, 6.0 Hz, CH), 4.03 (1H, dd, *J* = 8.0, 6.0 Hz, OH), 1.47-1.25 (12H, m, 4x CH<sub>3</sub>). **<sup>13</sup>C NMR** (100 MHz, CDCl<sub>3</sub>): δ<sub>C</sub> 160.49 (d, *J* = 7.0 Hz), 158.49 (d, *J* = 7.0 Hz), 130.23 (apparent t, *J* = 4.0 Hz), 127.49 (apparent t, *J* = 3.0 Hz), 124.14 (dd, *J* = 14.0, 2.0 Hz), 121.88 (dd, *J* = 9.5, 4.0 Hz), 118.57 (dd, *J* = 25.5, 2.5 Hz), 72.25 (dd, *J* = 41.0, 7.5 Hz), 63.92 (dd, *J* = 165.0, 2.5 Hz), 24.08 (dd, *J* = 19.0, 3.5 Hz), 23.71 (dd, *J* = 29.5, 5.5 Hz). **<sup>19</sup>F NMR** (376 MHz, CDCl<sub>3</sub>, <sup>1</sup>H-decoupled): δ<sub>F</sub> -114.10 (d, *J* = 7.5 Hz). **<sup>31</sup>P NMR** (162 MHz, CDCl<sub>3</sub>, <sup>1</sup>H-decoupled): δ<sub>P</sub> 18.31 (d, *J* = 7.0 Hz).

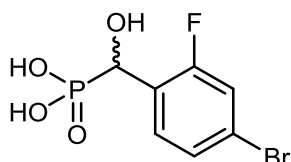

**((4-Bromo-2-fluorophenyl)(hydroxy)methyl)phosphonic acid 22**: isolated as a

white solid (90%). **mp** >200 °C (dec.). **IR**,  $\nu_{\max}$  (ATR)/cm<sup>-1</sup>: 3244 (br), 2980 (s), 2954 (s), 2291 (m), 1592 (s), 1483 (s), 1380 (m), 1190 (m); 1100 (m), 991 (m), 845 (w). **HRMS** (ESI<sup>+</sup>): calculated for C<sub>7</sub>H<sub>6</sub>BrFO<sub>4</sub>P [M - H]<sup>-</sup> requires 282.9171; found: 282.9173. **<sup>1</sup>H NMR** (400 MHz, CD<sub>3</sub>OD): δ<sub>H</sub> 7.61 (1H, td, *J* = 8.0, 2.5 Hz, CH ar.), 7.45-7.09 (2H, m, CH ar.), 5.19 (1H, d, *J* = 14.0 Hz, CH). **<sup>13</sup>C NMR** (125 MHz, CD<sub>3</sub>OD): δ<sub>C</sub> 161.06 (dd, *J* = 250.5, 6.0 Hz), 131.96, 128.41, 127.81 (d, *J* = 14.0 Hz), 122.21 (d, *J* = 9.0 Hz), 119.33 (d, *J* = 26.0 Hz), 64.88 (d, *J* =

163.5 Hz). **<sup>19</sup>F NMR** (376 MHz, CD<sub>3</sub>OD, <sup>1</sup>H-decoupled): δ<sub>F</sub> -116.35 (*Far.*). **<sup>31</sup>P NMR** (162 MHz, CDCl<sub>3</sub>, <sup>1</sup>H-decoupled): δ<sub>P</sub> 18.62 (d, *J* = 6.0 Hz).

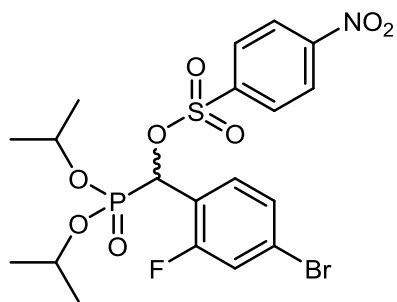

**(4-Bromo-2-fluorophenyl)(diisopropoxyphosphoryl)methyl 4-nitrobenzenesulfonate 23**: isolated as a white solid (94%). **mp** 93-96 °C.

**R<sub>f</sub>** = 0.30 (99 : 1, CHCl<sub>3</sub> : MeOH). **IR**, ν<sub>max</sub> (ATR)/cm<sup>-1</sup>: 2975 (s), 1515 (s), 1376 (s), 1210 (m, P=O), 1170 (m), 1011 (m), 870 and 855 (w), 810 (w), 787 (m), 745 (w). **HRMS** (ESI<sup>+</sup>): calculated for C<sub>19</sub>H<sub>22</sub>O<sub>8</sub>NBrF<sub>2</sub>PSNa [M + Na]<sup>+</sup> requires 575.98634; found: 575.98578. **<sup>1</sup>H NMR** (400 MHz, CDCl<sub>3</sub>):

δ<sub>H</sub> 8.32-8.16 (2H, m, *CH ar.*), 8.06-7.83 (2H, m, *CH ar.*), 7.34 (1H, ddd, *J* = 9.0, 7.5, 2.0 Hz, *CH ar.*), 7.16 (2H, dt, *J* = 9.5, 1.5 Hz, *CH ar.*), 5.92 (1H, d, *J* = 16.0 Hz, *PCH*), 4.80 (1H, dp, *J* = 7.0, 6.0 Hz, CH<sub>3</sub>CH), 4.57 (1H, dp, *J* = 7.0, 6.0 Hz, CH<sub>3</sub>CH), 1.33 (6H, dd, *J* = 6.0, 5.0 Hz, 2x CH<sub>3</sub>), 1.17 (6H, dd, *J* = 76.0, 6.0 Hz, 2x CH<sub>3</sub>). **<sup>13</sup>C NMR** (100 MHz, CDCl<sub>3</sub>): δ<sub>C</sub> 160.61, 158.12 (d, *J* = 7.0 Hz), 150.63, 141.99, 131.15 (apparent t, *J* = 3.0 Hz), 129.29, 127.93 (apparent t, *J* = 3.0 Hz), 124.33 (dd, *J* = 9.5, 3.0 Hz), 124.11, 118.89 (d, *J* = 25.0 Hz), 118.68, 73.43 (dd, *J* = 33.0, 7.0 Hz), 70.63 (dd, *J* = 178.0, 2.5 Hz), 24.10 (dd, *J* = 4.5, 4.0 Hz), 23.55 (dd, *J* = 35.0, 5.5 Hz). **<sup>19</sup>F NMR** (376 MHz, CDCl<sub>3</sub>, <sup>1</sup>H-decoupled): δ<sub>F</sub> -113.59 (d, *J* = 5.5 Hz). **<sup>31</sup>P NMR** (162 MHz, CDCl<sub>3</sub>, <sup>1</sup>H-decoupled): δ<sub>P</sub> 10.77 (d, *J* = 5.5 Hz).

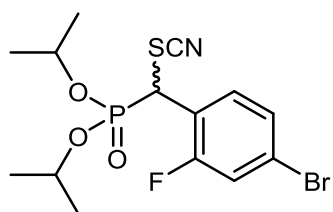

**Diisopropyl ((4-bromo-2-fluorophenyl)(thiocyanato)methyl)phosphonate 24**:

isolated as a colourless oil (77%). **IR**, ν<sub>max</sub> (ATR)/cm<sup>-1</sup>: 2988 (s), 2170 (s), 1595 (s), 1460 (s), 1355 (m), 1259 (s), 1090 (m), 982 (w). **HRMS** (ESI<sup>+</sup>): calculated for C<sub>14</sub>H<sub>18</sub>O<sub>3</sub>NBrF<sub>2</sub>PSNa [M + Na]<sup>+</sup> requires 431.98046; found:

431.98062. **<sup>1</sup>H NMR** (400 MHz, CDCl<sub>3</sub>): δ<sub>H</sub> 7.63 (1H, td, *J* = 8.0, 2.0 Hz, *CH ar.*), 7.37 (1H, dd, *J* = 8.5, 2.0 Hz, *CH ar.*), 7.30 (1H, ddd, *J* = 9.0, 2.0, 1.0 Hz, *CH ar.*), 5.01-4.72 (2H, m), 4.59 (1H, dp, *J* = 7.5, 6.0 Hz, CH<sub>3</sub>CH), 1.36 (6H, dd, *J* = 6.0, 1.5 Hz, 2x CH<sub>3</sub>), 1.17 (6H, dd, *J* = 81.5, 6.0, 2x CH<sub>3</sub>). **<sup>13</sup>C NMR** (100 MHz, CDCl<sub>3</sub>): δ<sub>C</sub> 159.88 (dd, *J* = 254.0, 8.0 Hz), 132.45, 128.38 (dd, *J* = 4.0, 2.1 Hz), 123.85 (dd, *J* = 9.5, 2.5 Hz), 119.70 (dd, *J* = 14.0, 3.0 Hz), 119.42 (d, *J* = 25.0 Hz), 110.02 (d, *J* = 10.0 Hz), 73.66 (dd, *J* = 24.0, 7.5 Hz), 39.29 (dd, *J* = 152.0, 2.5 Hz), 24.07 (apparent t, *J* = 3.5 Hz), 23.53 (dd, *J* = 58.5, 5.5 Hz). **<sup>19</sup>F NMR** (376 MHz, CDCl<sub>3</sub>, <sup>1</sup>H-decoupled): δ<sub>F</sub> -113.95 (d, *J* = 4.0 Hz). **<sup>31</sup>P NMR** (162 MHz, CDCl<sub>3</sub>, <sup>1</sup>H-decoupled): δ<sub>P</sub> 13.98 (d, *J* = 3.5 Hz).

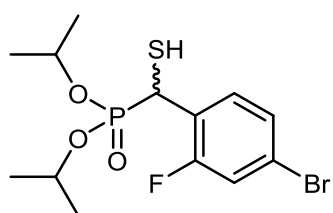

**Diisopropyl ((4-bromo-2-fluorophenyl)(mercapto)methyl)phosphonate 25**:

isolated as a colourless oil (67%). **R<sub>f</sub>** = 0.35 (9.5 : 0.5, CHCl<sub>3</sub> : MeOH). **IR**, ν<sub>max</sub> (ATR)/cm<sup>-1</sup>: 2984 (m), 2940 (s), 2510 (m), 1585 (s), 1474 (s), 1380 (m), 1245 (m), 1109 (m), 980 (m), 780 (m). **HRMS** (ESI<sup>+</sup>): calculated for

$C_{13}H_{20}O_3BrFPS$   $[M + H]^+$  requires 385.00327; found: 385.00339.  $^1H$  NMR (400 MHz,  $CDCl_3$ ):  $\delta_H$  7.56 (1H, td,  $J = 8.0, 2.0$  Hz,  $CH$  ar.), 7.34-7.27 (1H, m,  $CH$  ar.), 7.21 (1H, ddd,  $J = 9.5, 2.0, 1.0$  Hz,  $CH$  ar.), 4.81 (1H, dp,  $J = 7.5, 6.0$  Hz,  $CH_3CH$ ), 4.55 (1H, dp,  $J = 7.5, 6.0$  Hz,  $CH_3CH$ ), 4.34 (1 H, dd,  $J = 20.0, 9.0$  Hz,  $SHCH$ ), 2.64 (1H, dd,  $J = 11.0, 9.0$  Hz,  $SH$ ), 1.36 (3H, d,  $J = 6.0$  Hz,  $CH_3$ ), 1.29 (6H, dd,  $J = 34.0, 6.0$  Hz, 2x  $CH_3$ ), 1.04 (3H, d,  $J = 6.0$  Hz,  $CH_3$ ).  $^{13}C$  NMR (125 MHz,  $CDCl_3$ ):  $\delta_C$  161.19 (dd,  $J = 36.0, 8.0$  Hz), 159.55 (dd,  $J = 252.0, 8.0$  Hz), 159.19 (dd,  $J = 36.0, 8.0$  Hz), 132.27 (d,  $J = 50.0$  Hz), 131.54 (t,  $J = 3.5$  Hz), 128.00 (t,  $J = 3.0$  Hz), 127.83 (d,  $J = 3.0$  Hz), 124.44 (dd,  $J = 14.5, 3.0$  Hz), 122.85-121.53 (m), 119.73-118.70 (m), 118.63, 72.79 (d,  $J = 7.5$  Hz), 72.56 (d,  $J = 7.5$  Hz), 45.47 (dd,  $J = 145.0, 119.0$  Hz), 30.15 (dd,  $J = 152.5, 3.0$  Hz), 24.55-24.10 (m), 23.67 (ddd,  $J = 54.0, 5.5, 3.0$  Hz).  $^{19}F$  NMR (376 MHz,  $CDCl_3$ ,  $^1H$ -decoupled):  $\delta_F$  -114.84 (d,  $J = 4.5$  Hz).  $^{31}P$  NMR (162 MHz,  $CDCl_3$ ,  $^1H$ -decoupled):  $\delta_P$  19.72 (d,  $J = 4.5$  Hz).

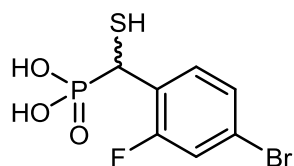

**((4-Bromo-2-fluorophenyl)(mercapto)methyl)phosphonic acid 26**: isolated as a white solid (92%). mp >190 °C (dec.). IR,  $\nu_{max}$  (ATR)/ $cm^{-1}$ : 3234 (br), 2983 (s), 2941 (s), 2520 (m), 2292 (m), 1588 (s), 1473 (s), 1383 (m), 1192 (m); 1106 (m), 992 (m). HRMS (ESI+): calculated for  $C_7H_8O_3BrFPS$   $[M + H]^+$  requires 300.90937; found: 300.90955.  $^1H$  NMR (400 MHz,  $CD_3OD$ ):  $\delta_H$  7.47 (1H, qd,  $J = 8.0, 2.0$  Hz,  $CH$  ar.), 7.32 (1H, d,  $J = 8.5$  Hz,  $CH$  ar.), 7.18 (1H, dd,  $J = 9.5, 2.0$  Hz,  $CH$  ar.), 4.42 (1H, dd,  $J = 22.5, 20.5$  Hz,  $PCH$ ).  $^{13}C$  NMR (125 MHz,  $CD_3OD$ ):  $\delta_C$  163.63-161.91 (m), 160.59 (dd,  $J = 36.5, 7.5$  Hz), 123.61-121.87 (m), 121.38 (dd,  $J = 14.0, 2.5$  Hz), 120.56 (d,  $J = 25.5$  Hz), 119.70 (dd,  $J = 26.0, 12.0$  Hz), 111.11 (d,  $J = 9.0$  Hz), 75.47 (dd,  $J = 13.5, 7.5$  Hz).  $^{19}F$  NMR (376 MHz,  $CD_3OD$ ,  $^1H$ -decoupled):  $\delta_F$  -115.64 (rotamer A), -115.87 (rotamer B).  $^{31}P$  NMR (162 MHz,  $CD_3OD$ ,  $^1H$ -decoupled):  $\delta_P$  15.38 (conformational isomer A), 15.25 (conformational isomer B).

### 3. $^1\text{H}$ and $^{13}\text{C}$ NMR spectra:

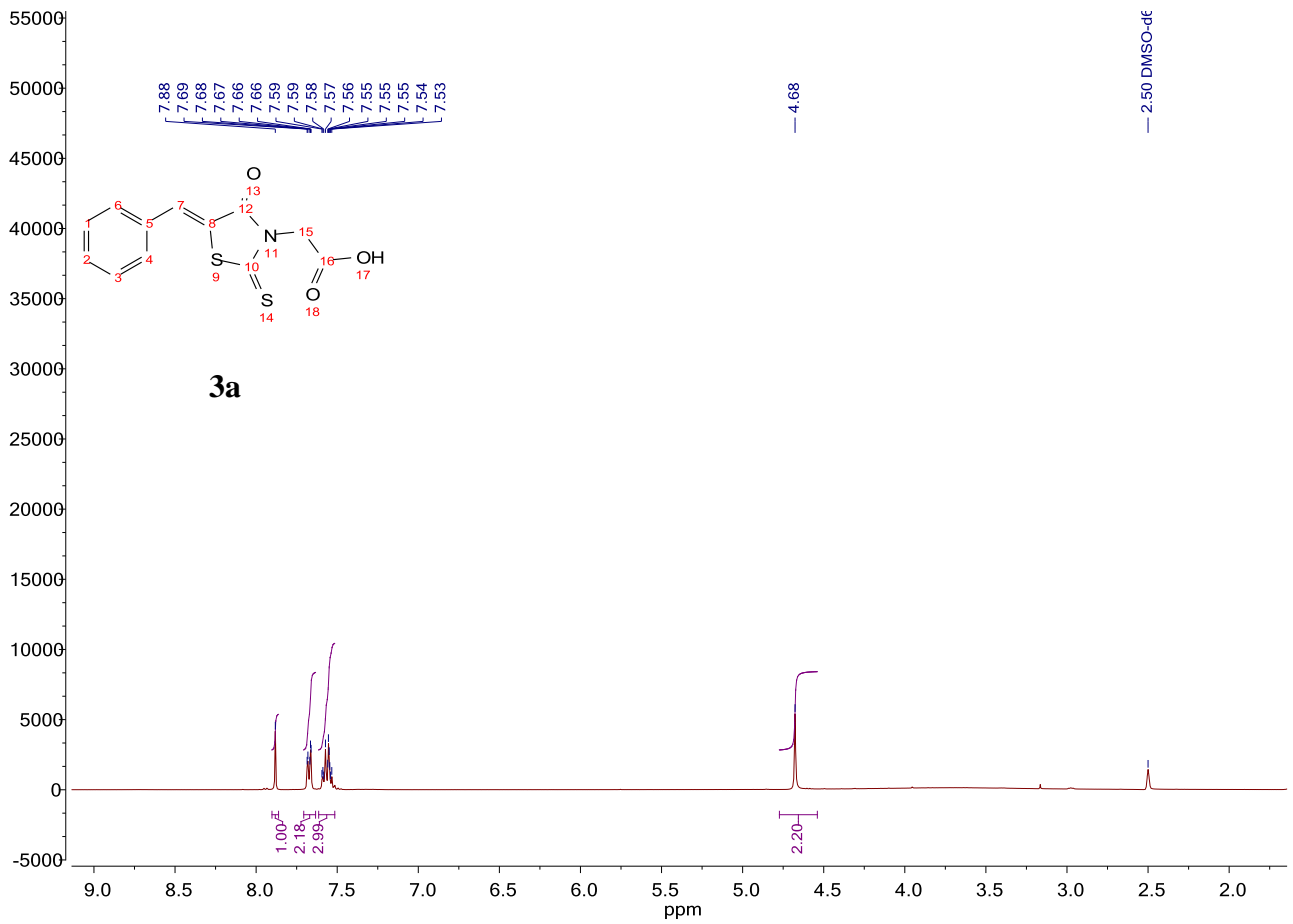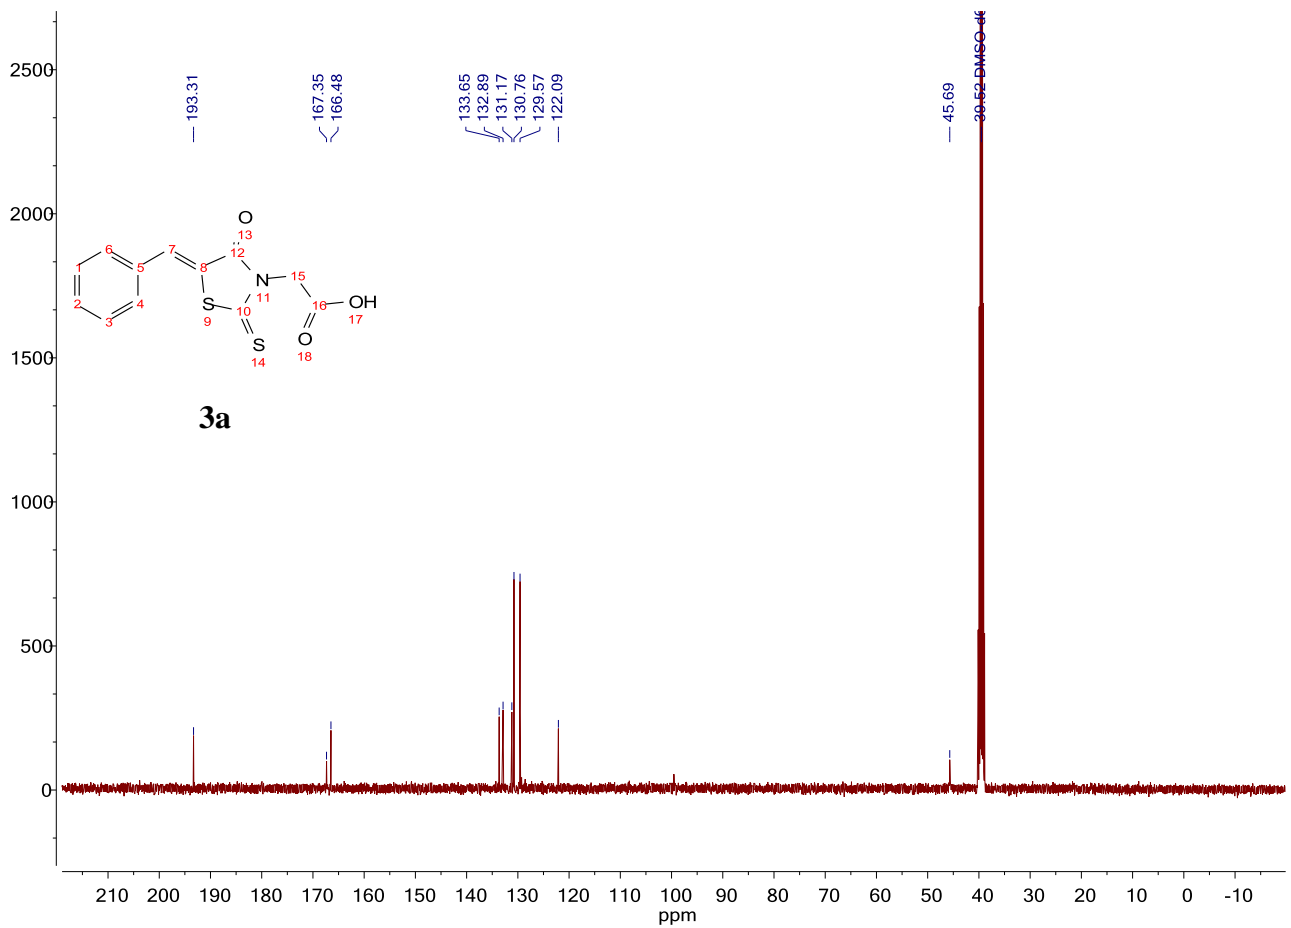

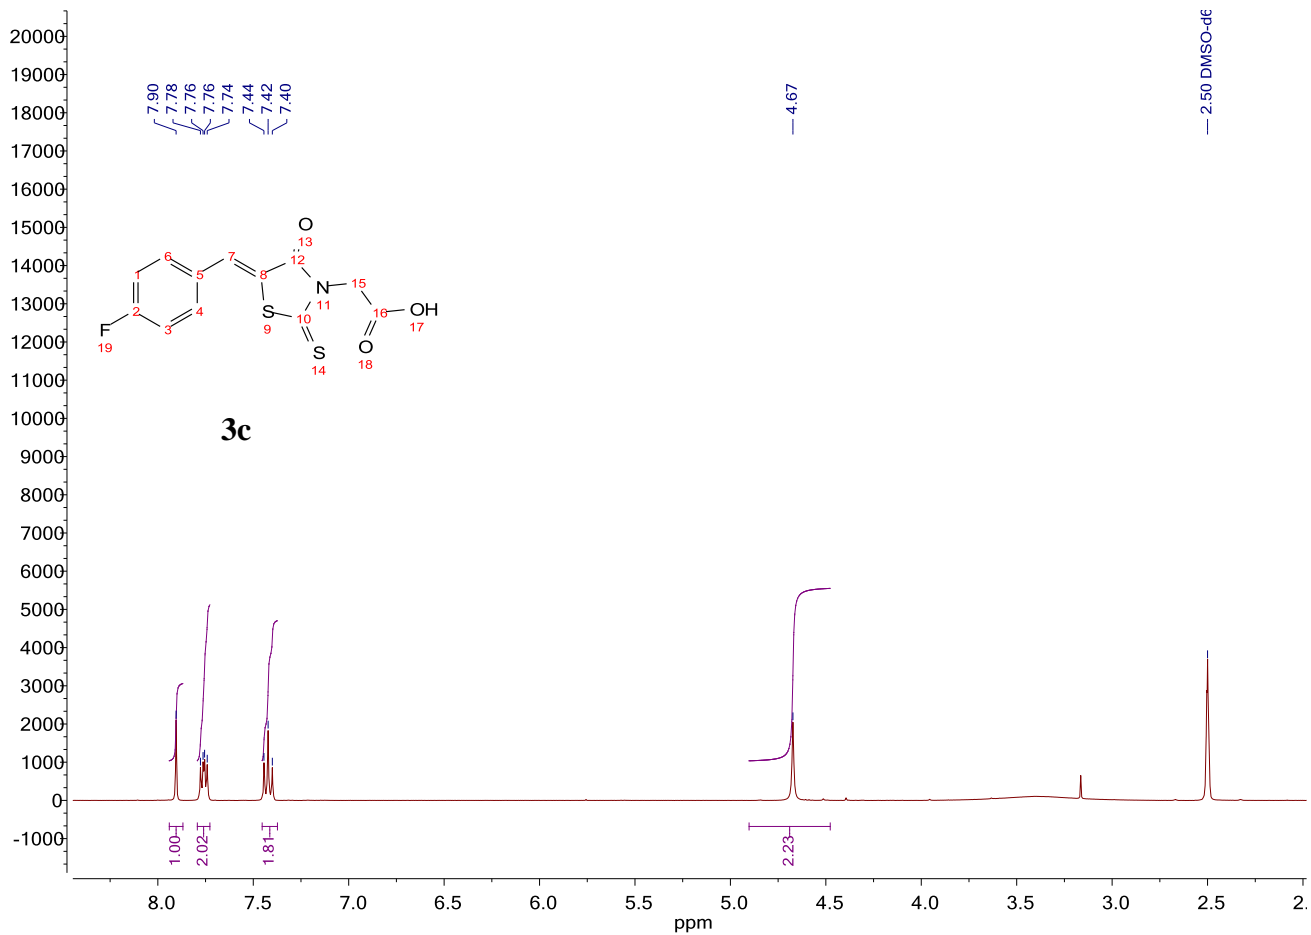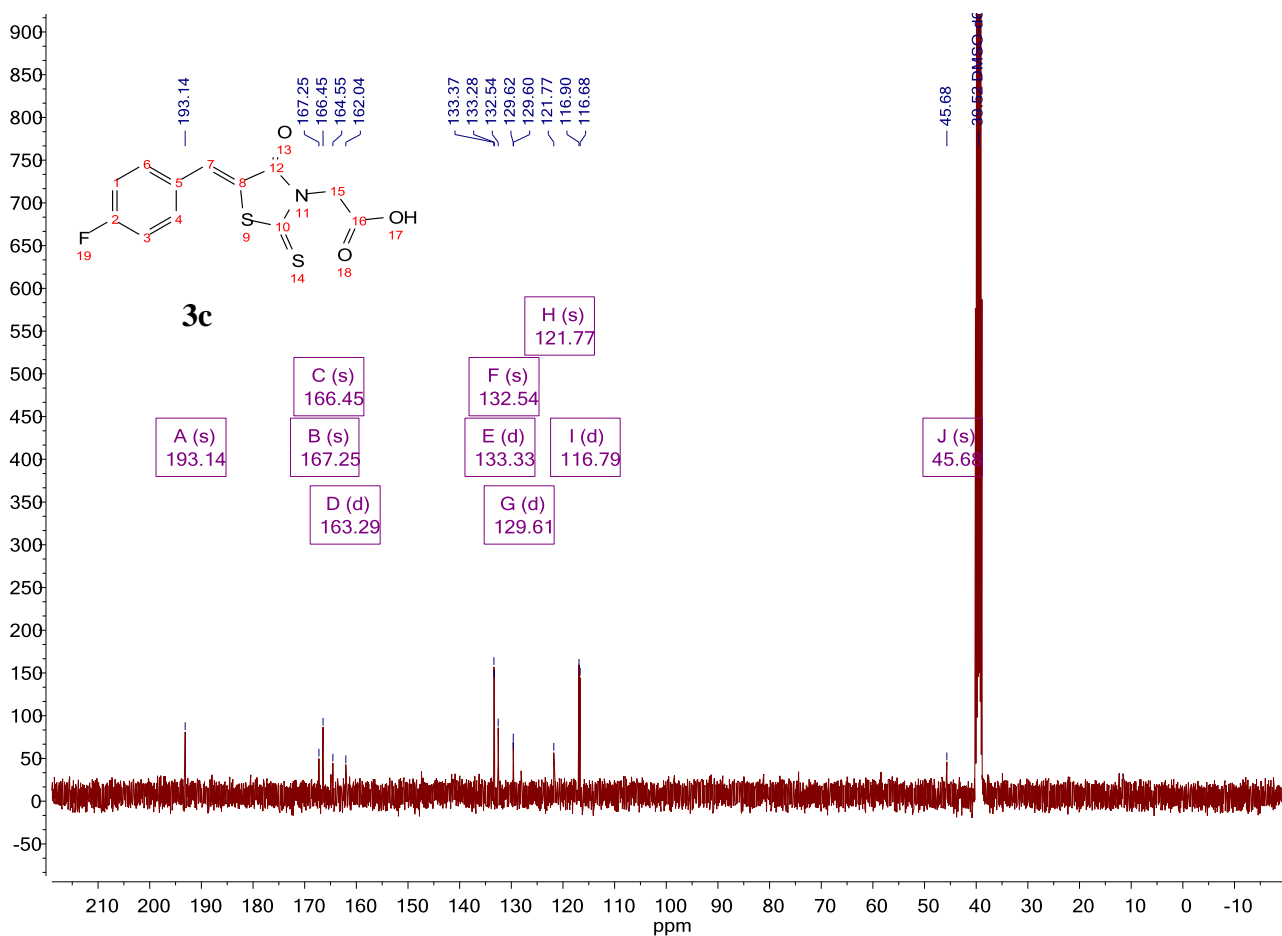

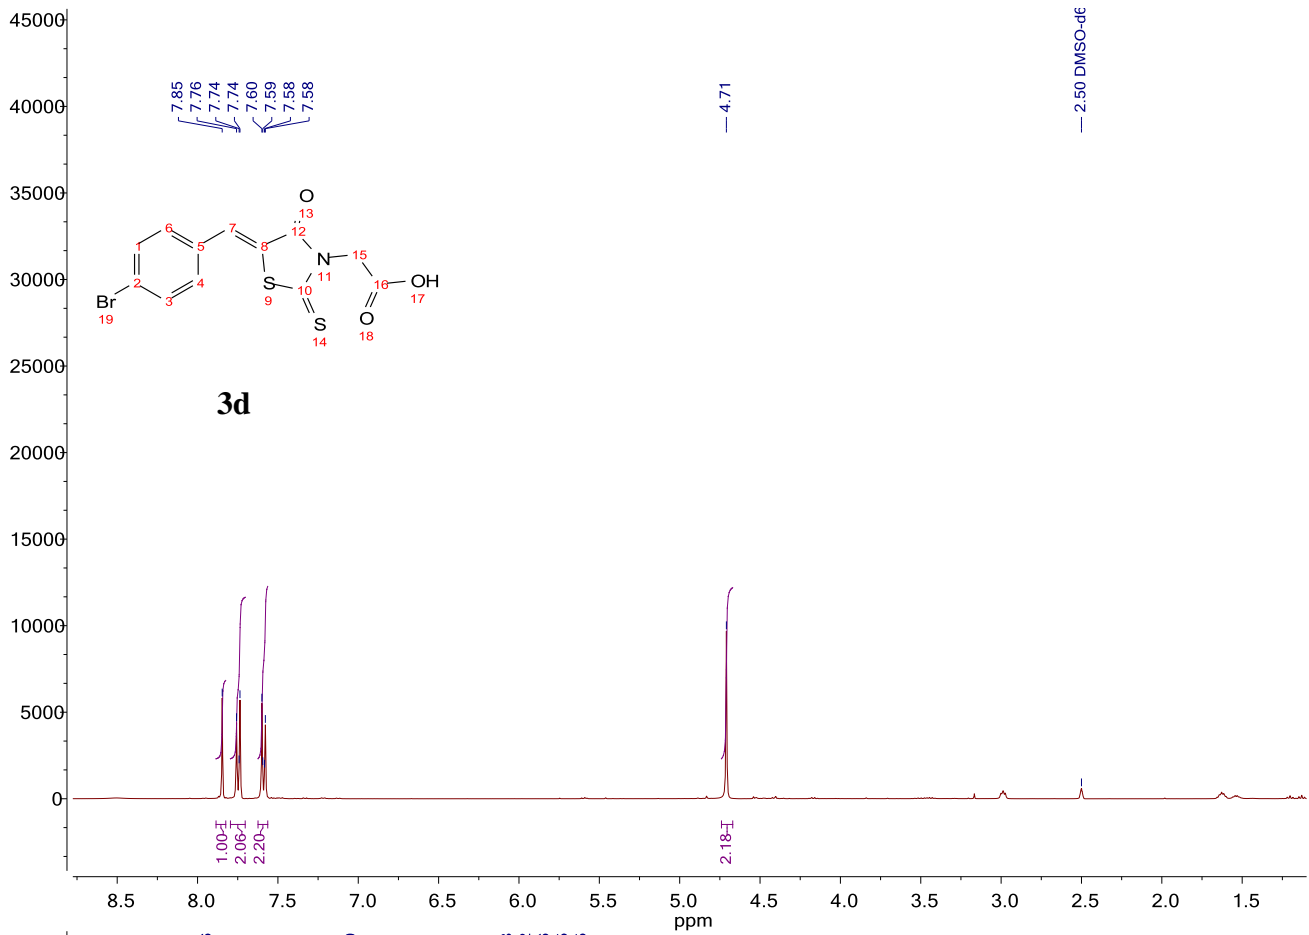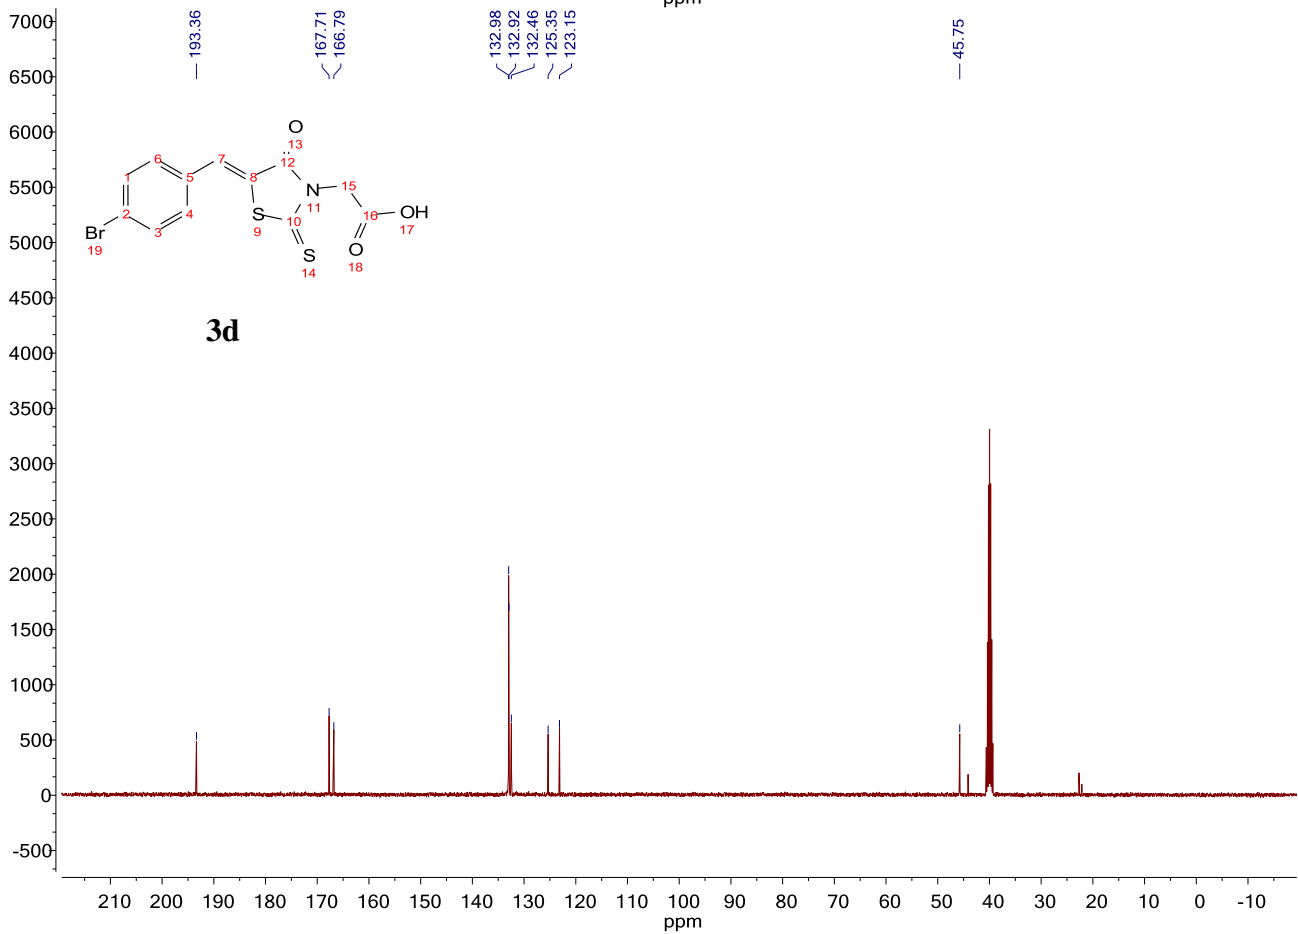



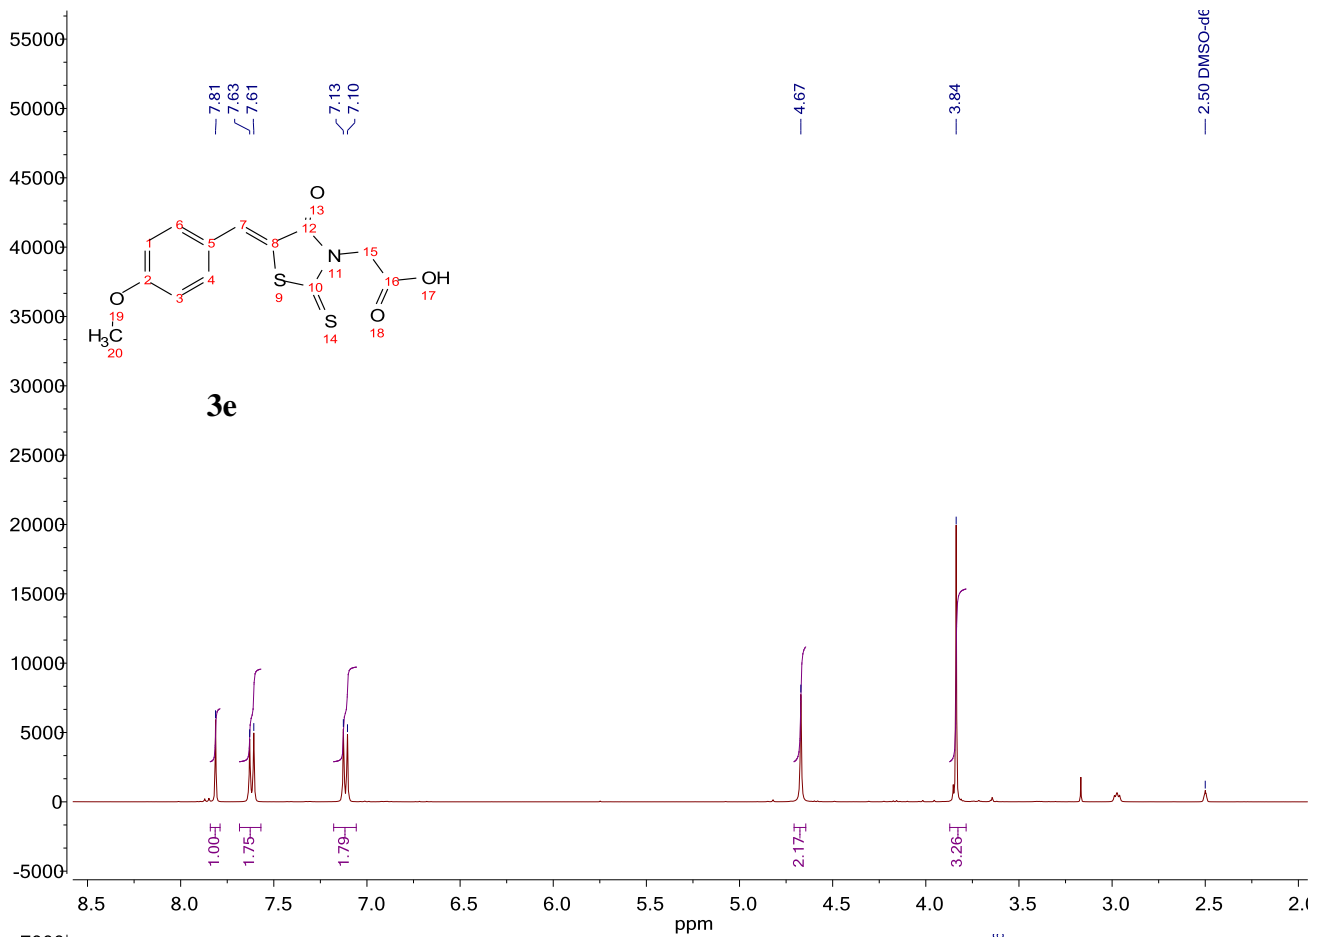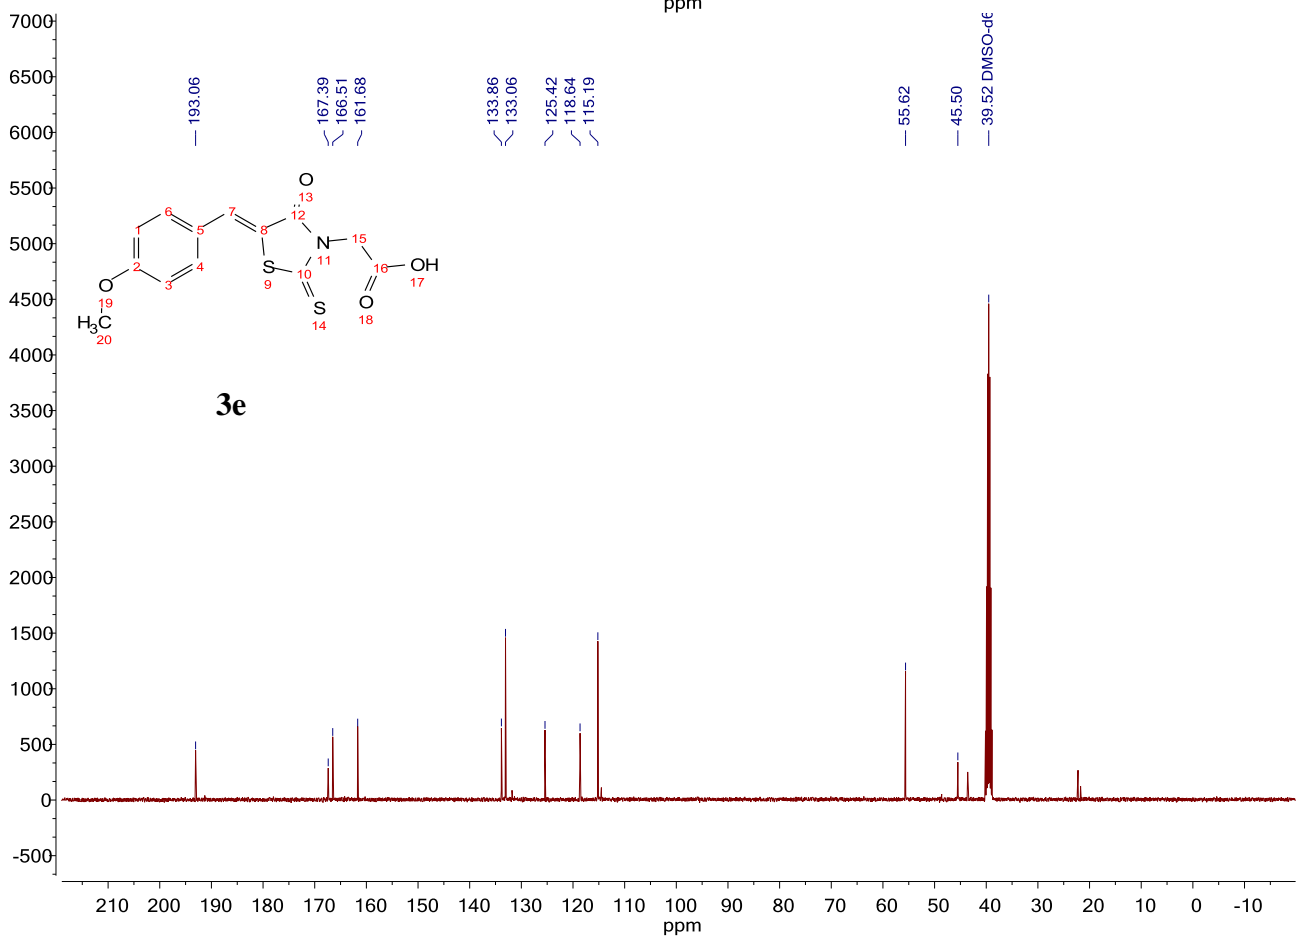

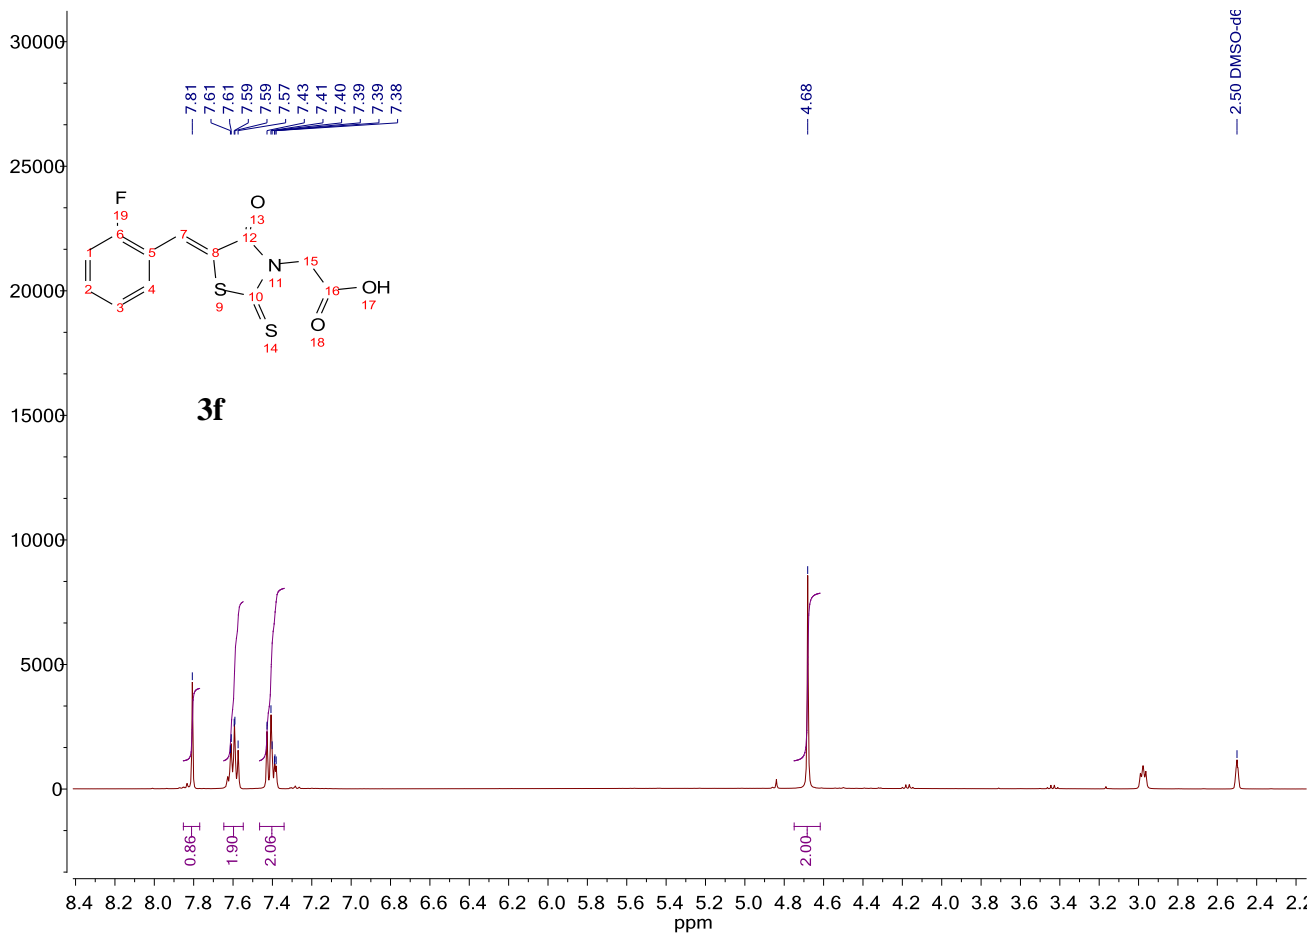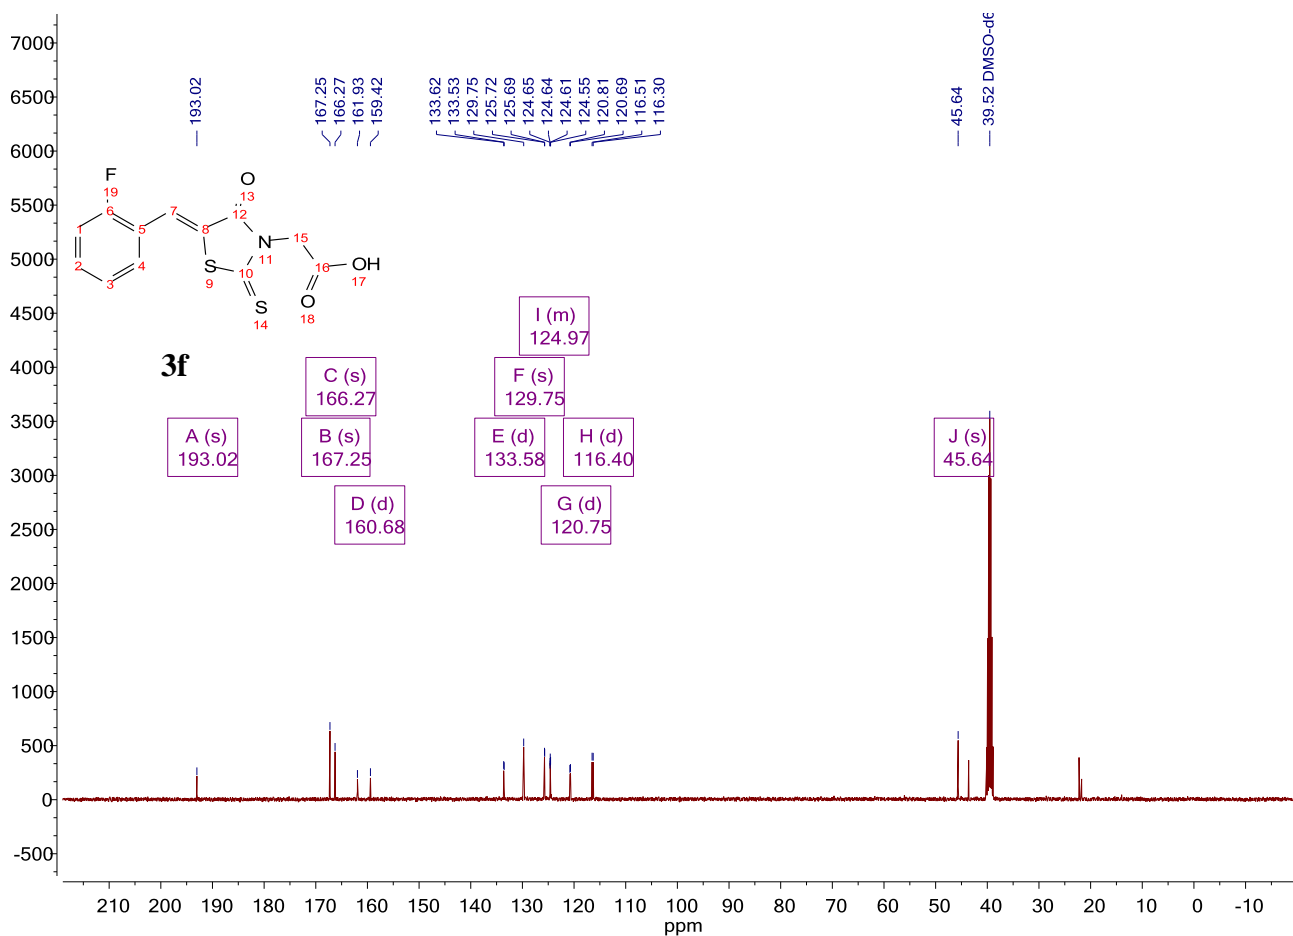

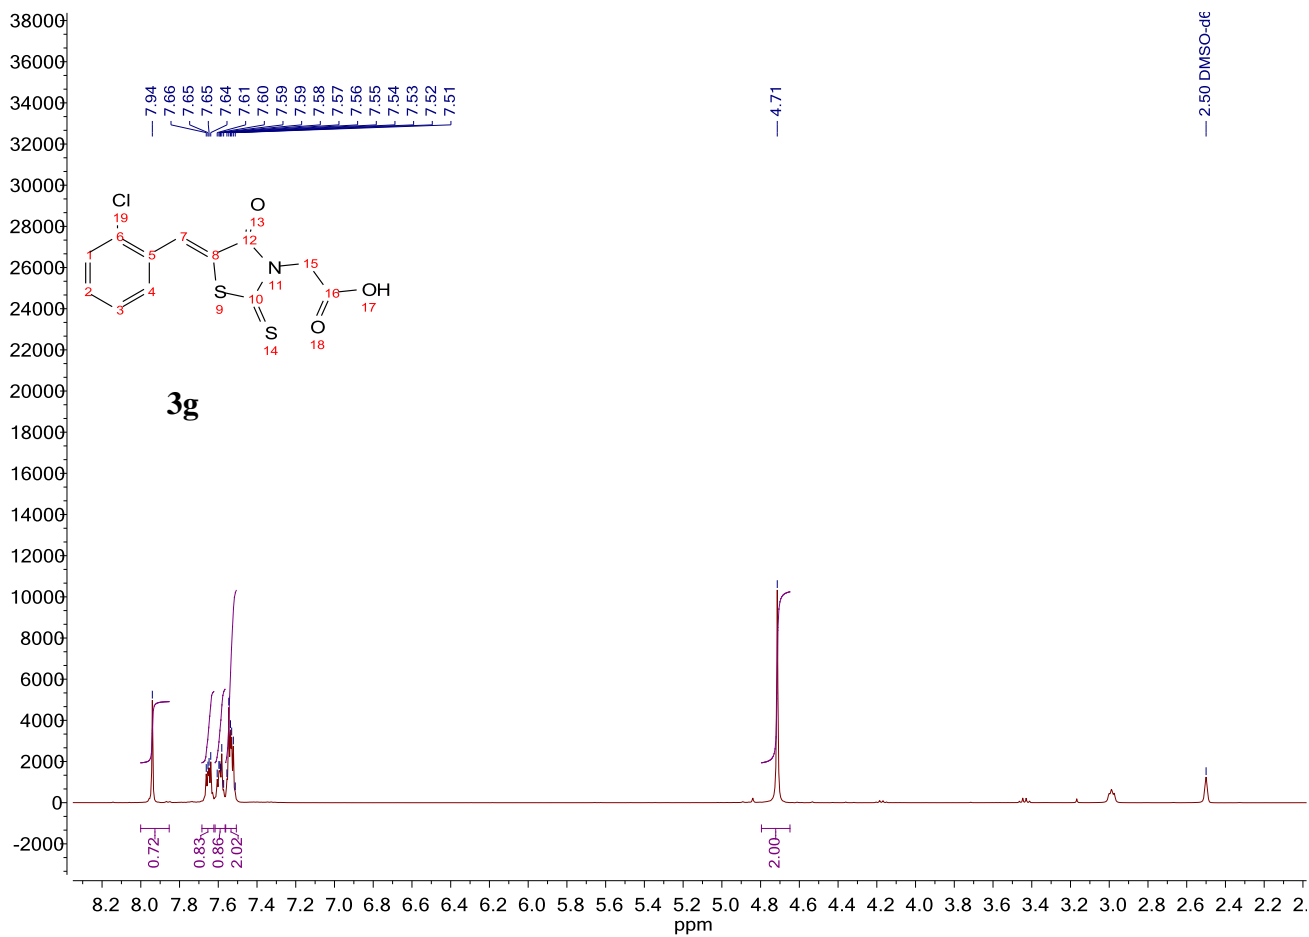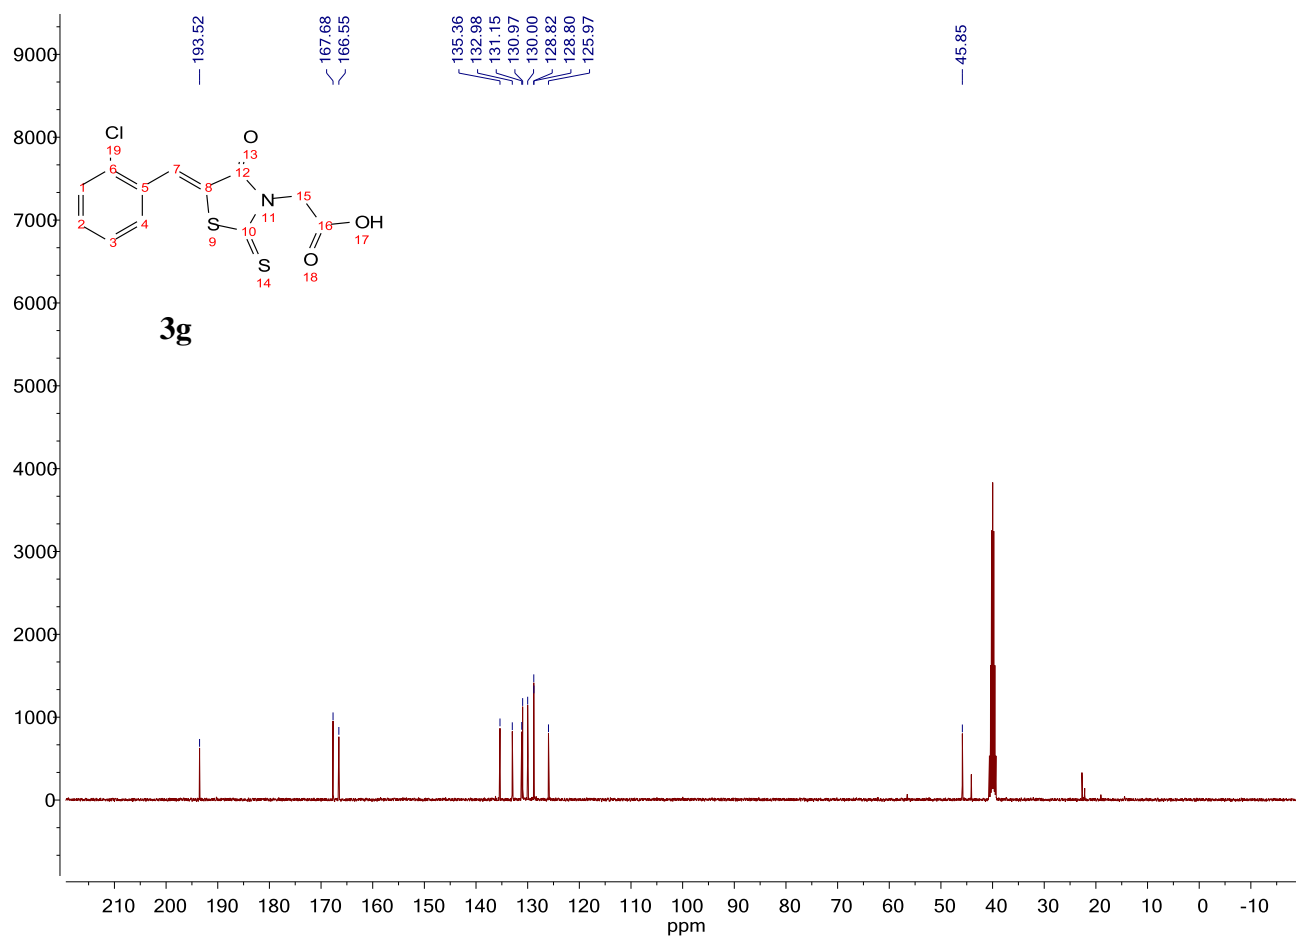

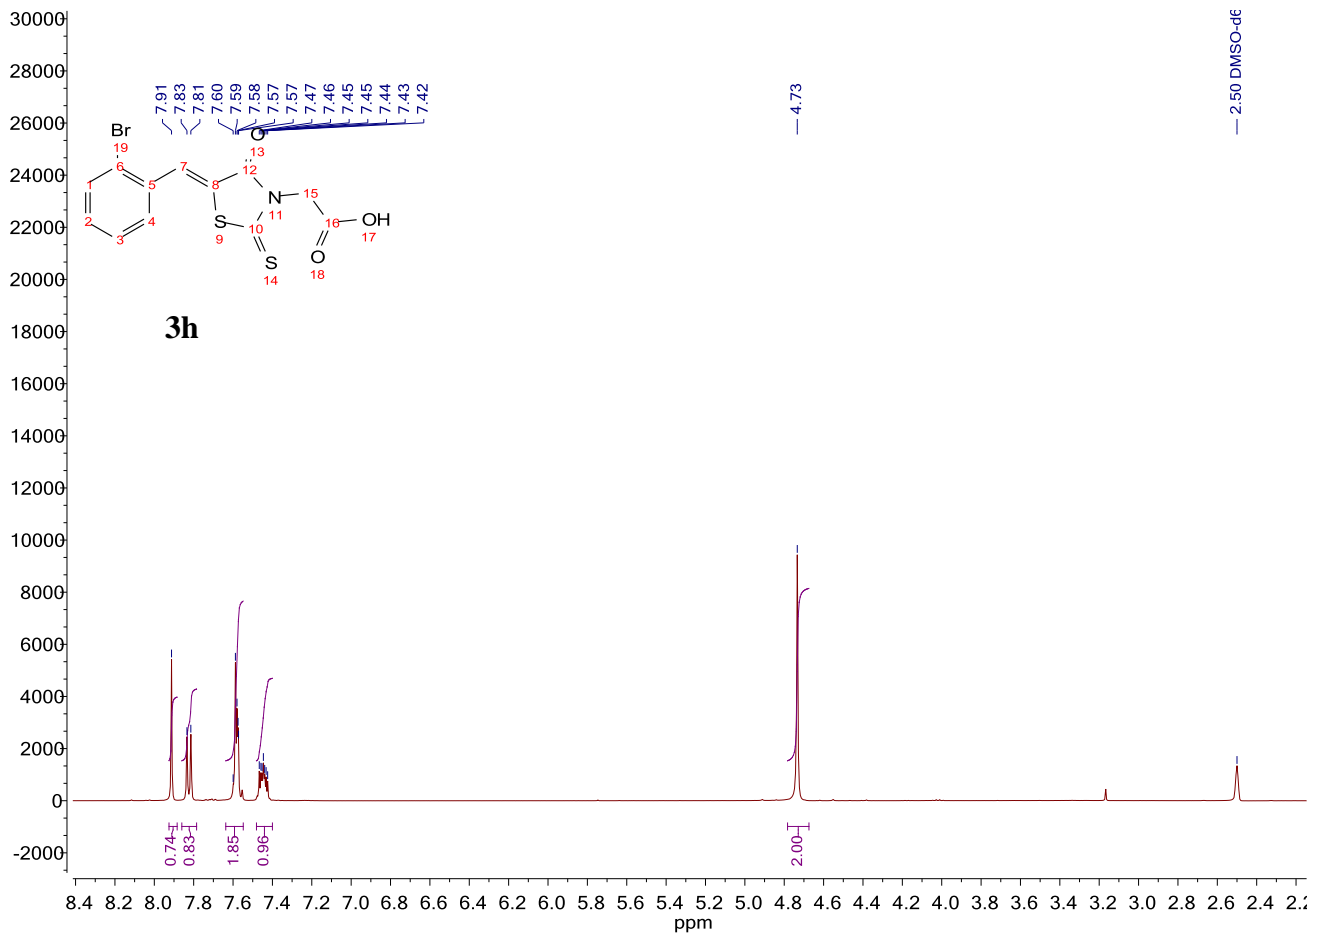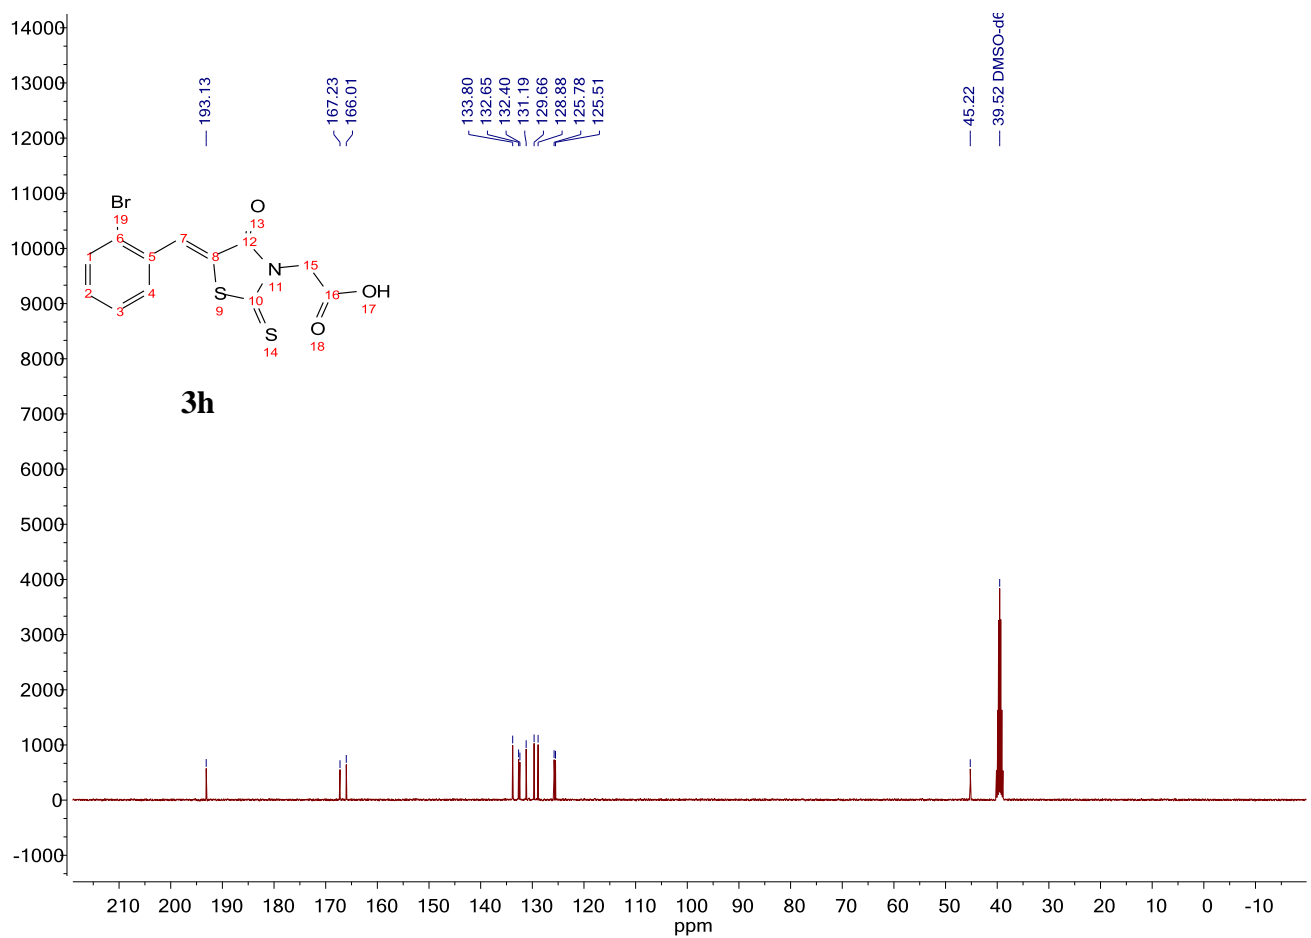

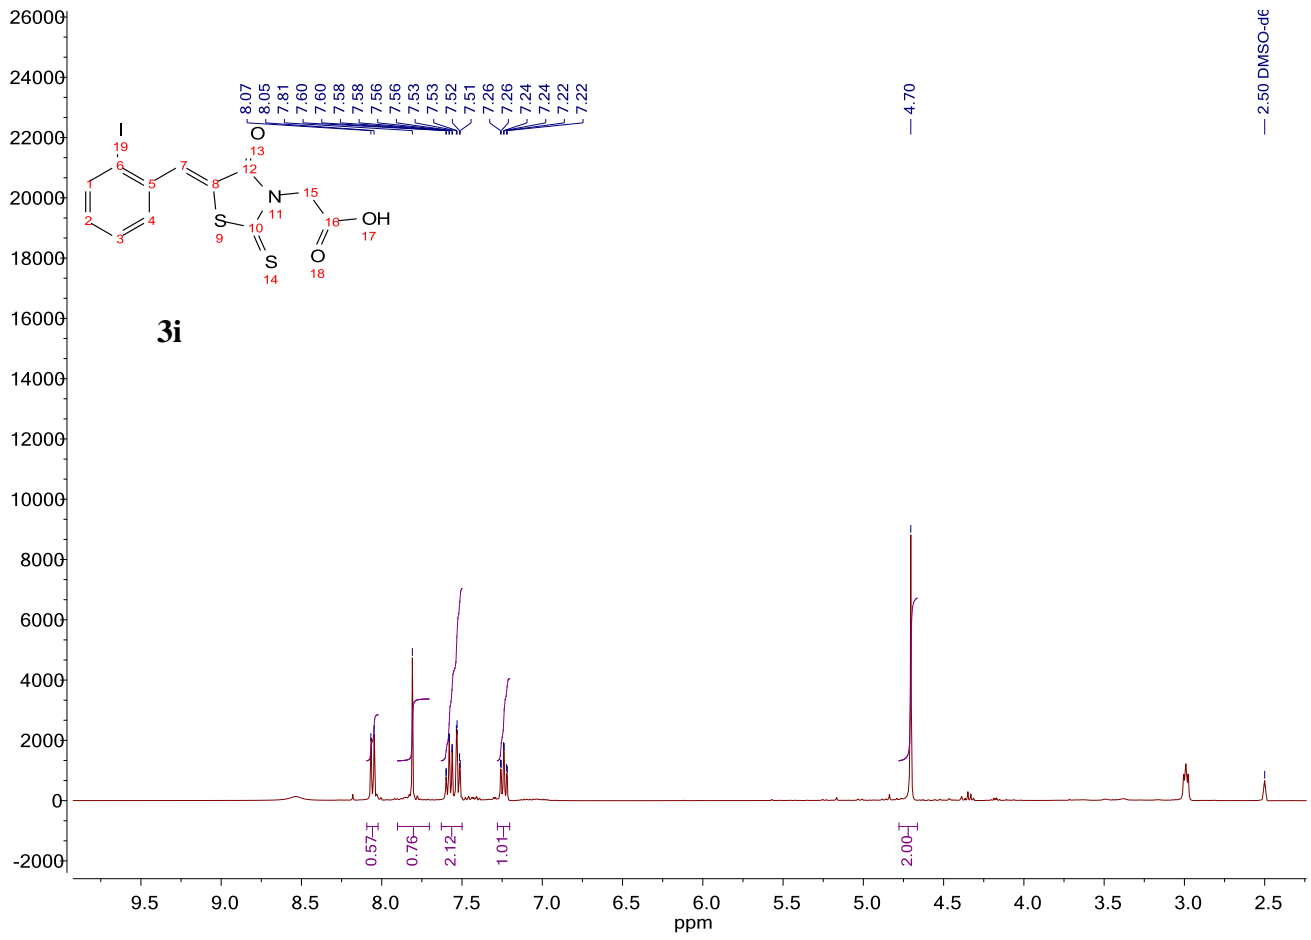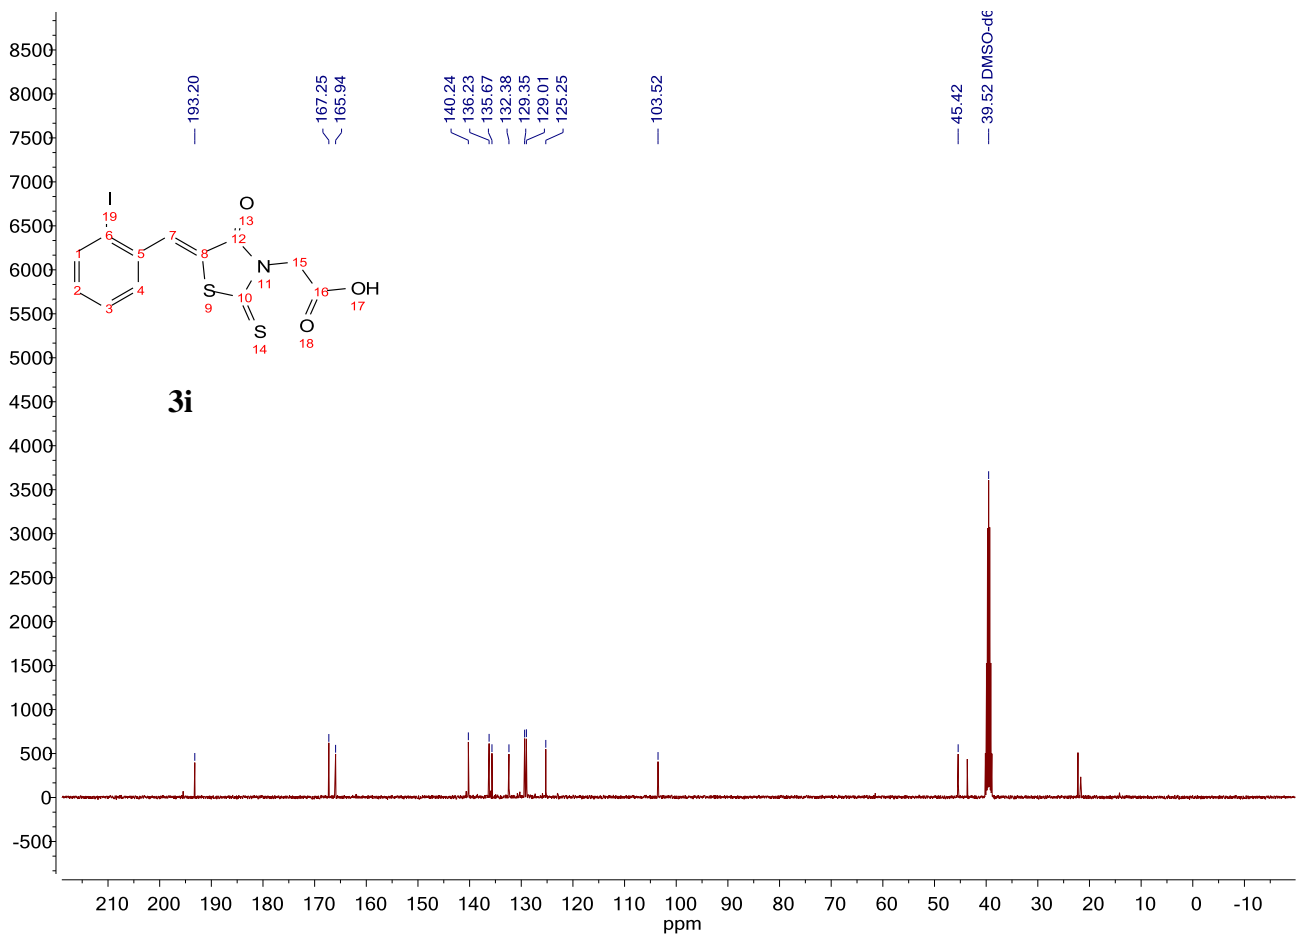

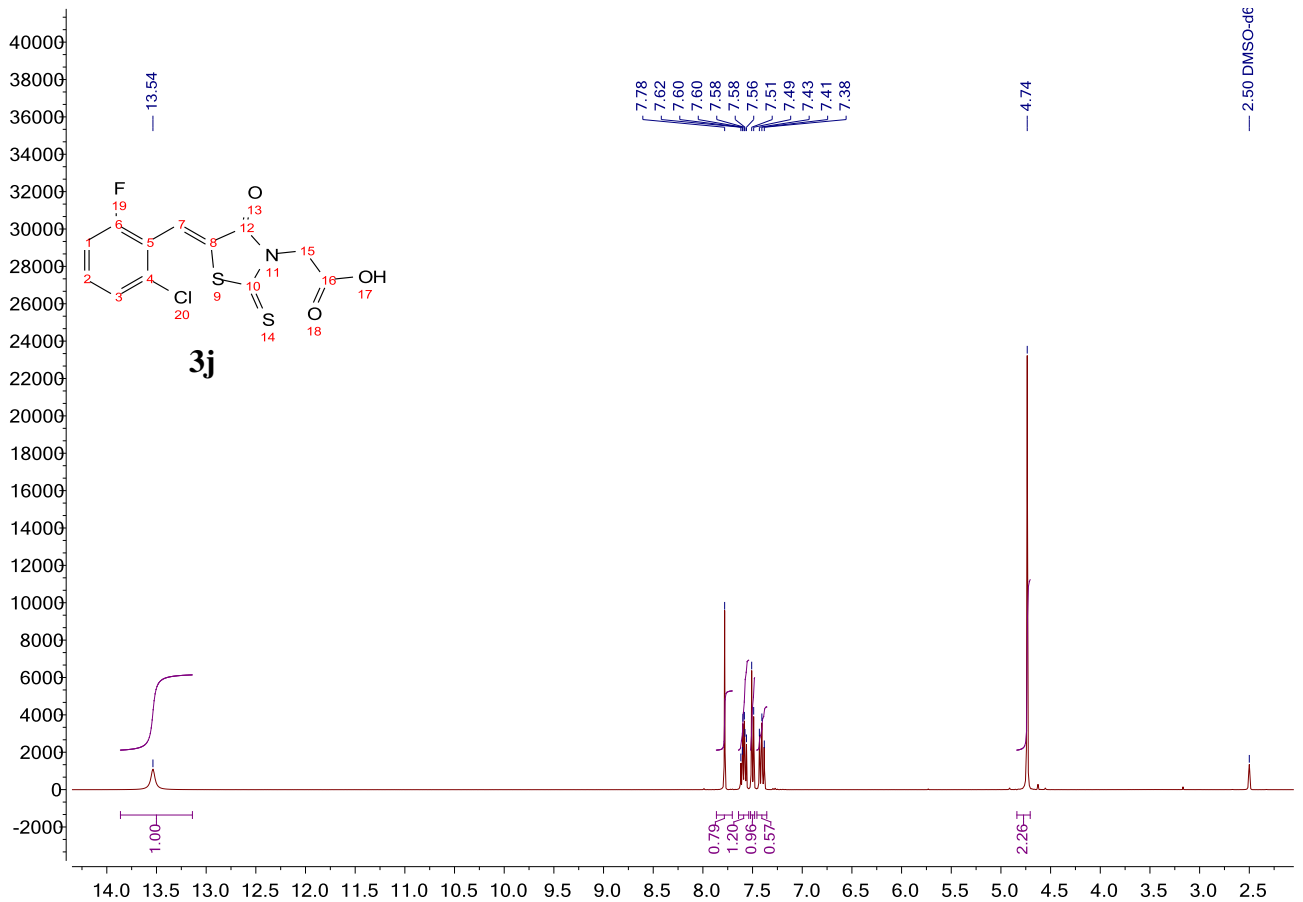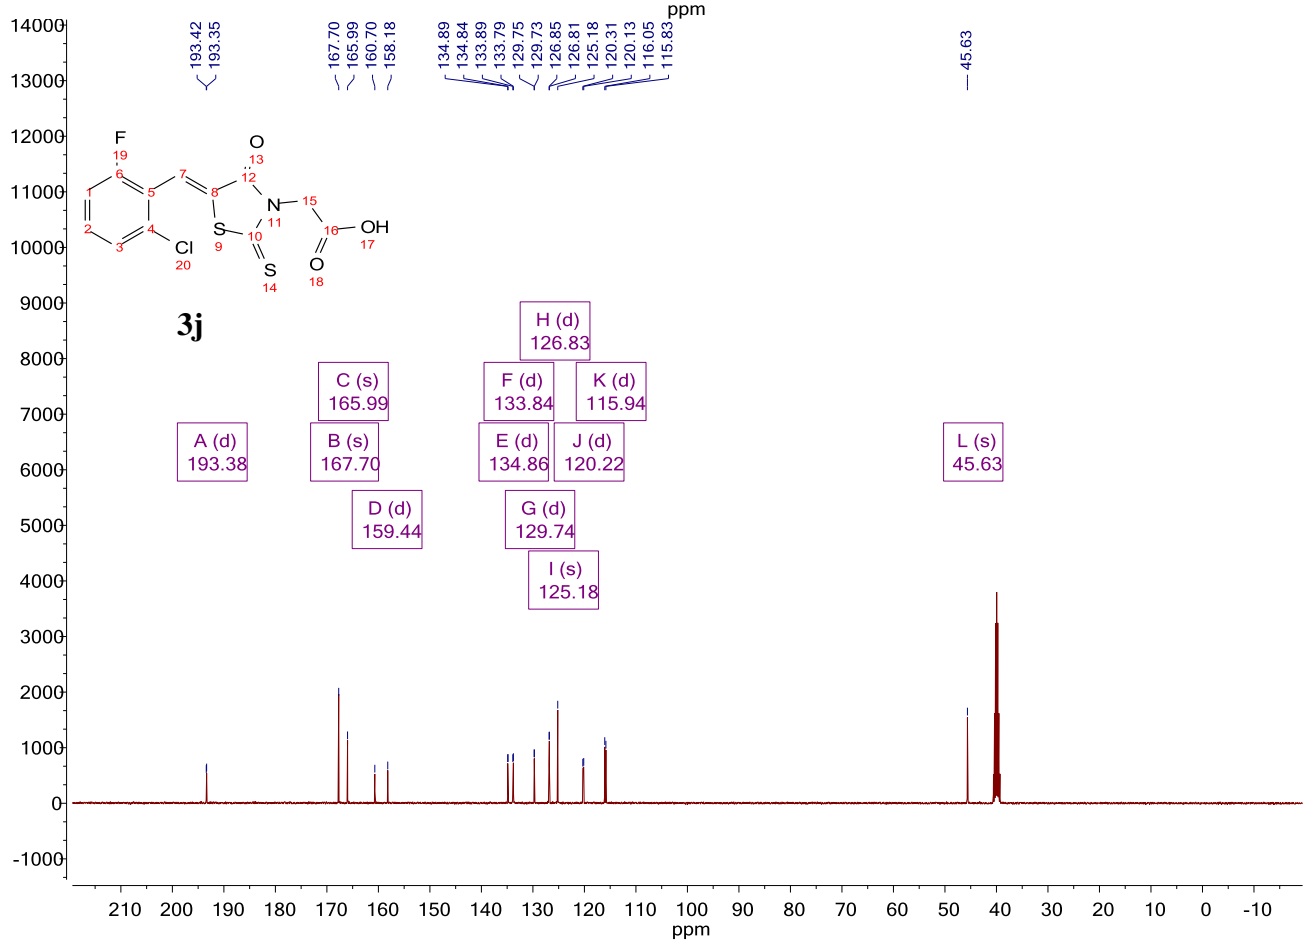

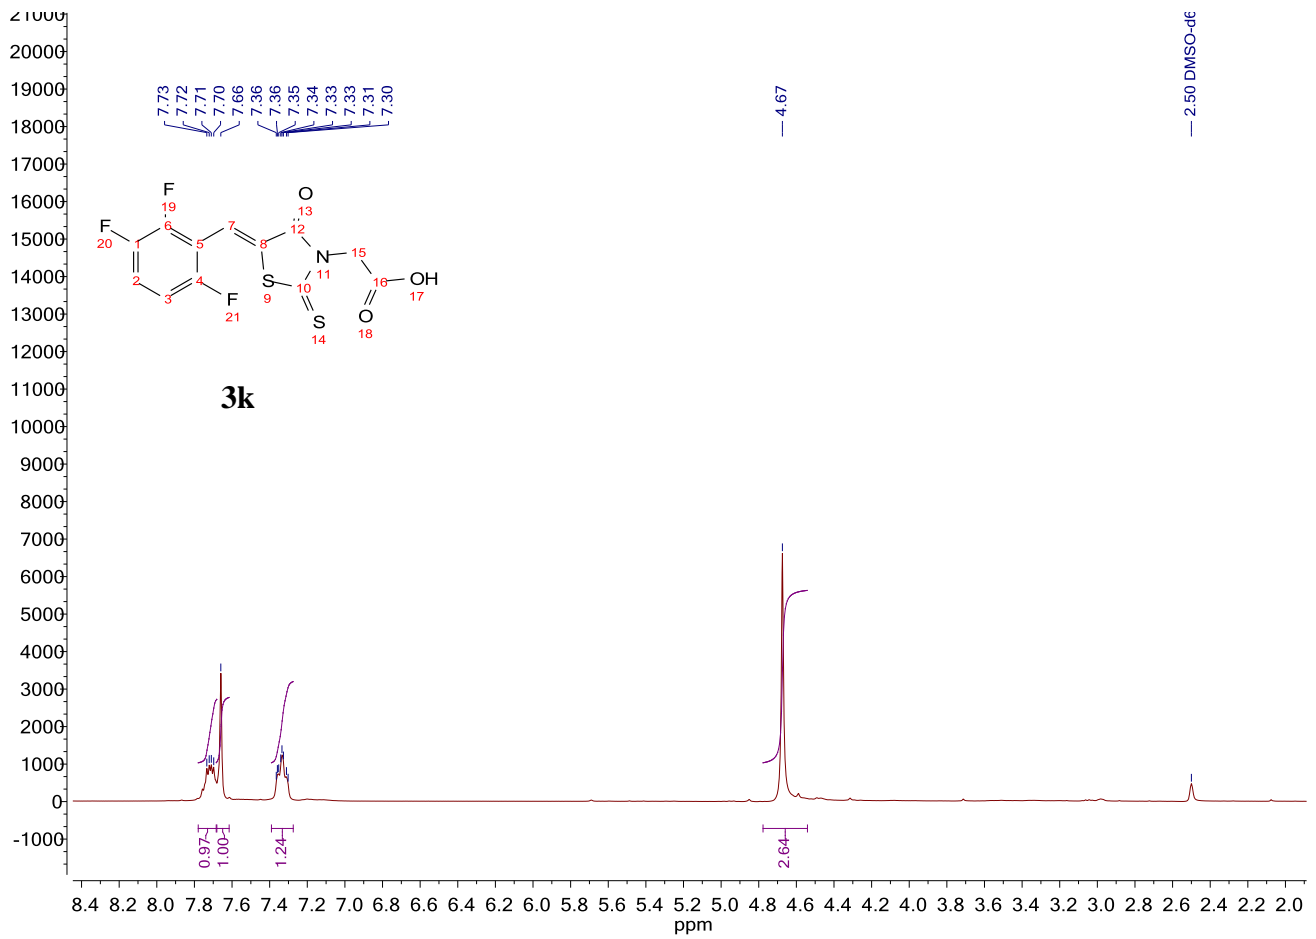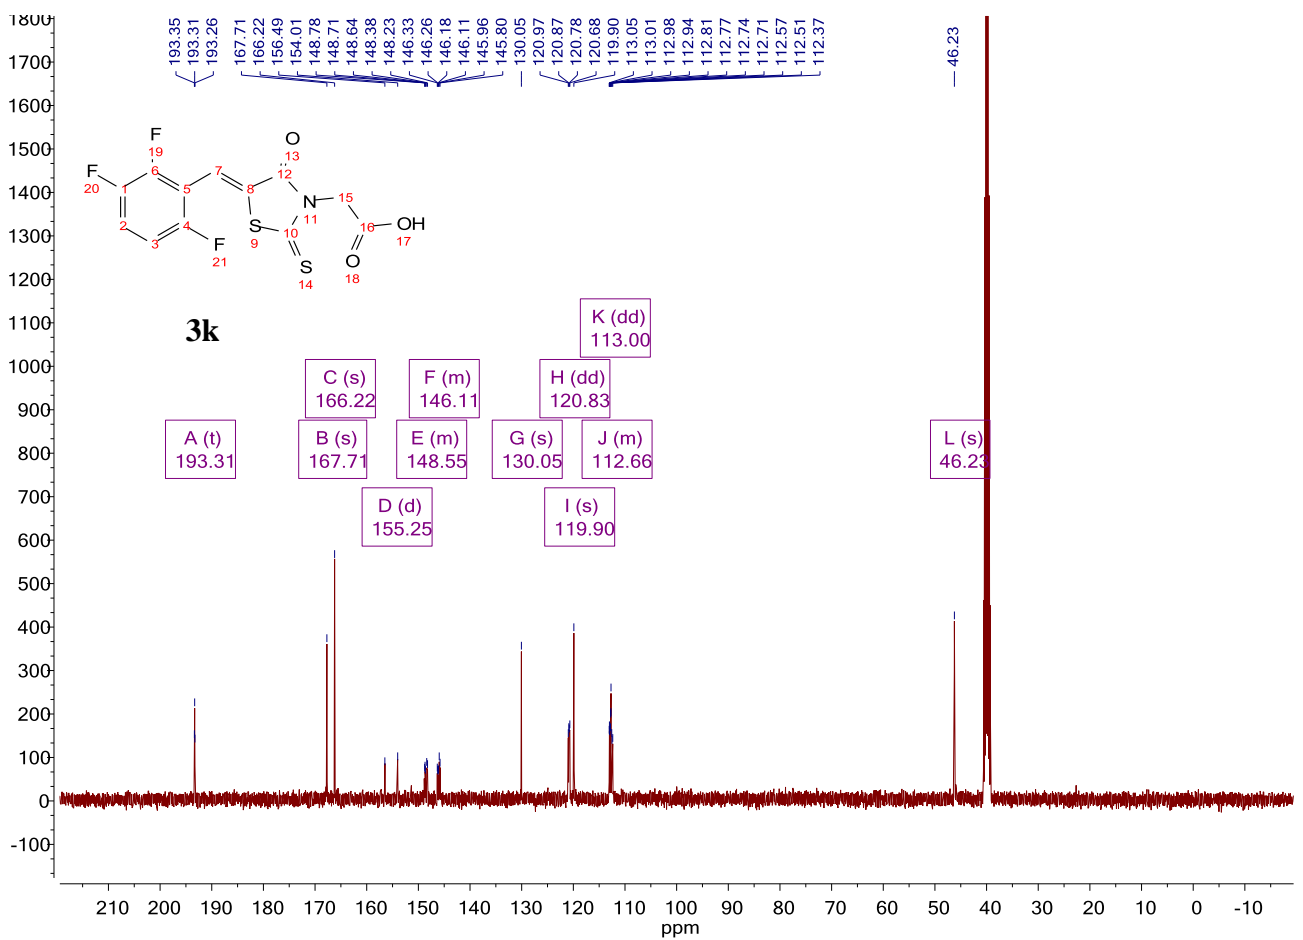

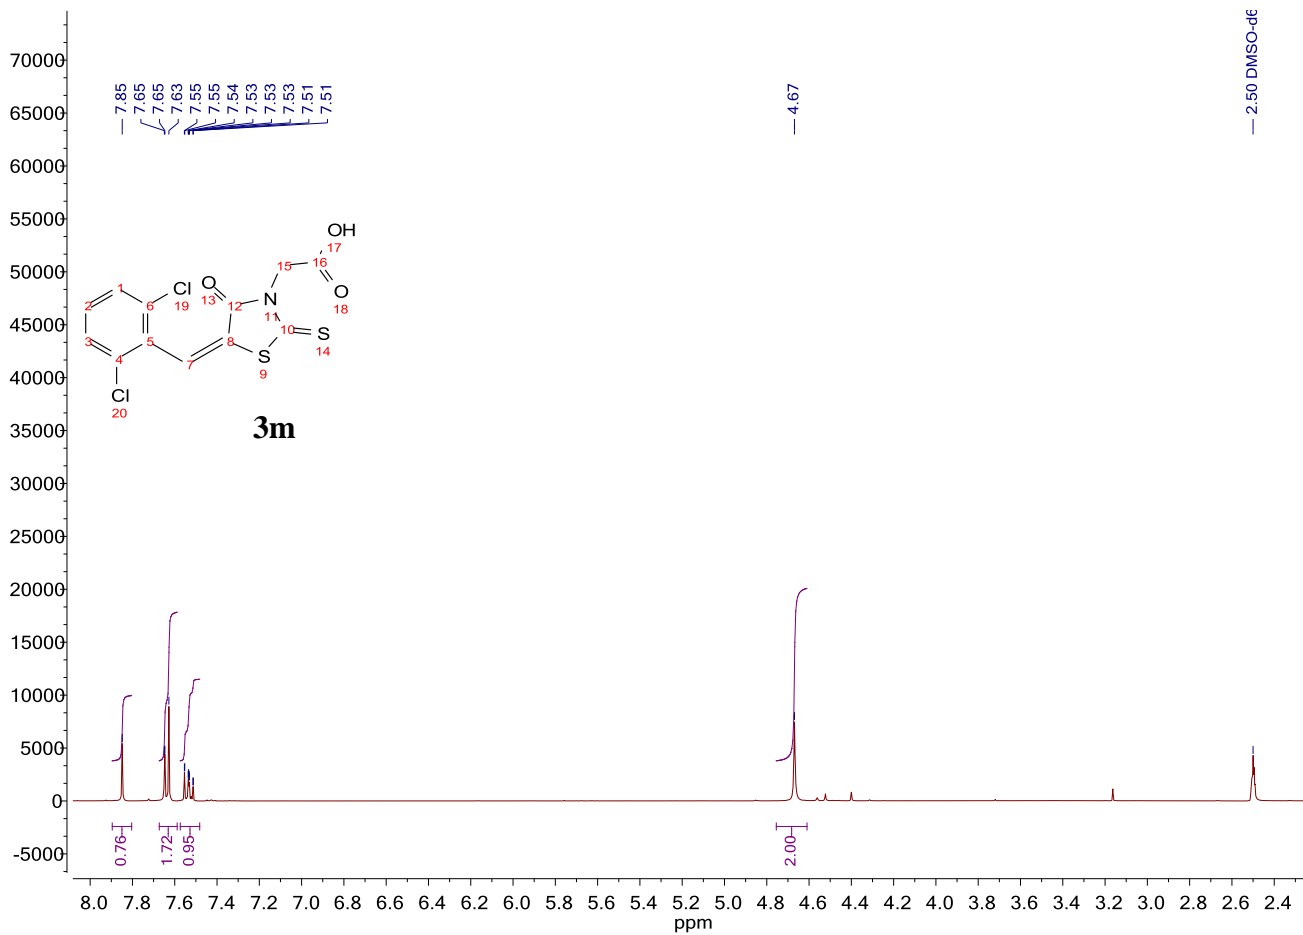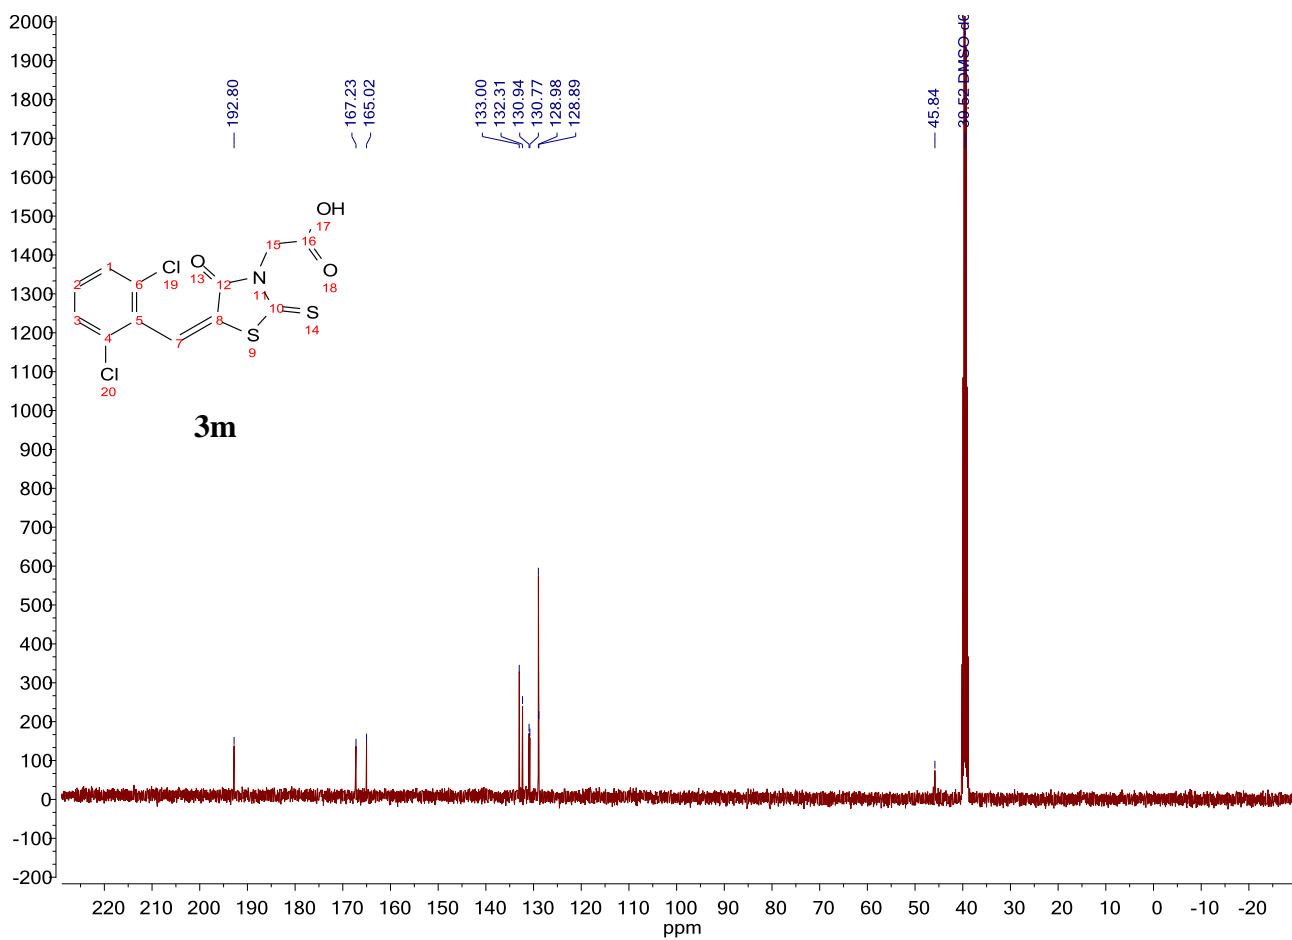



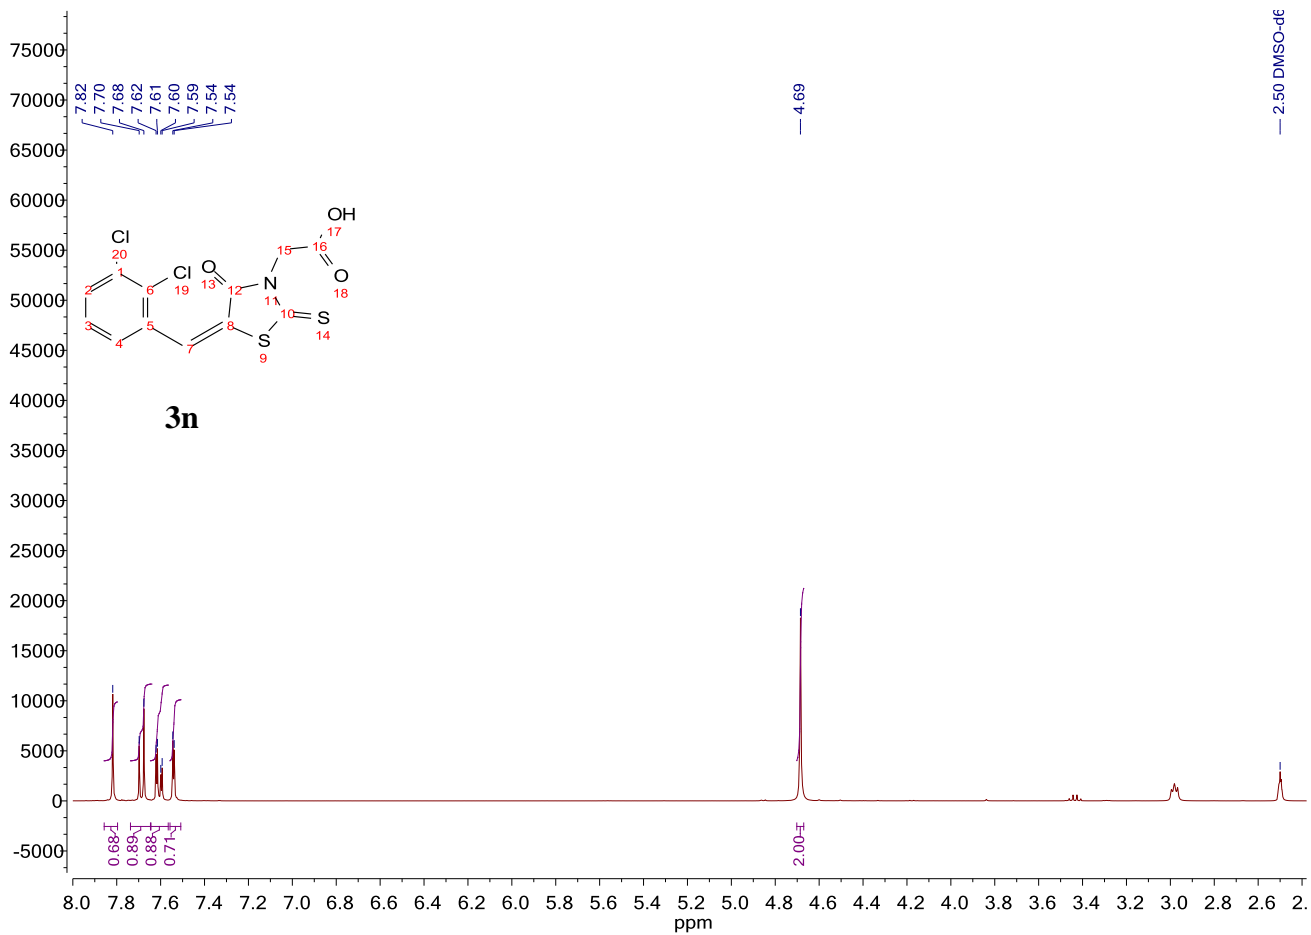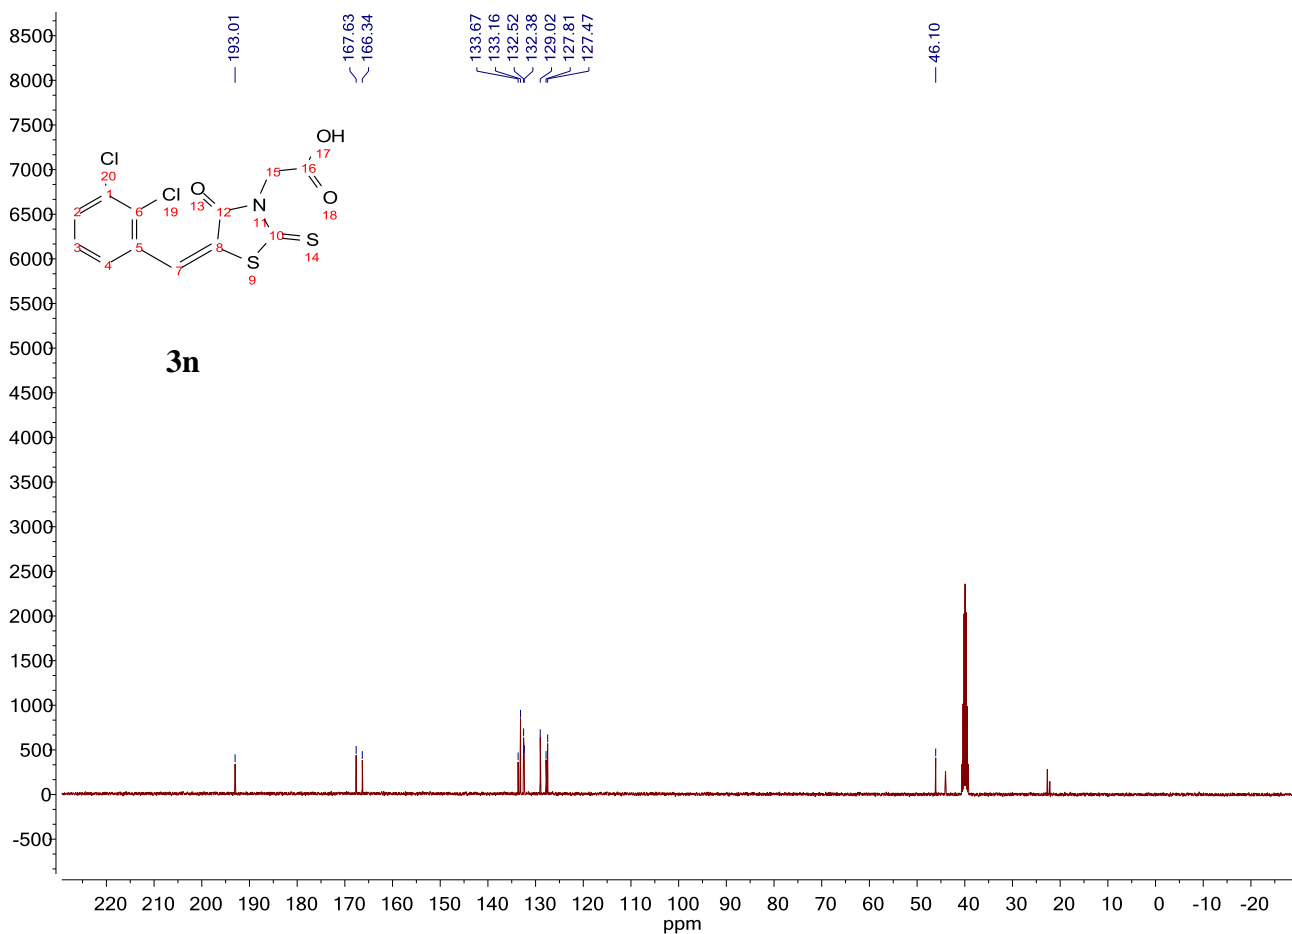

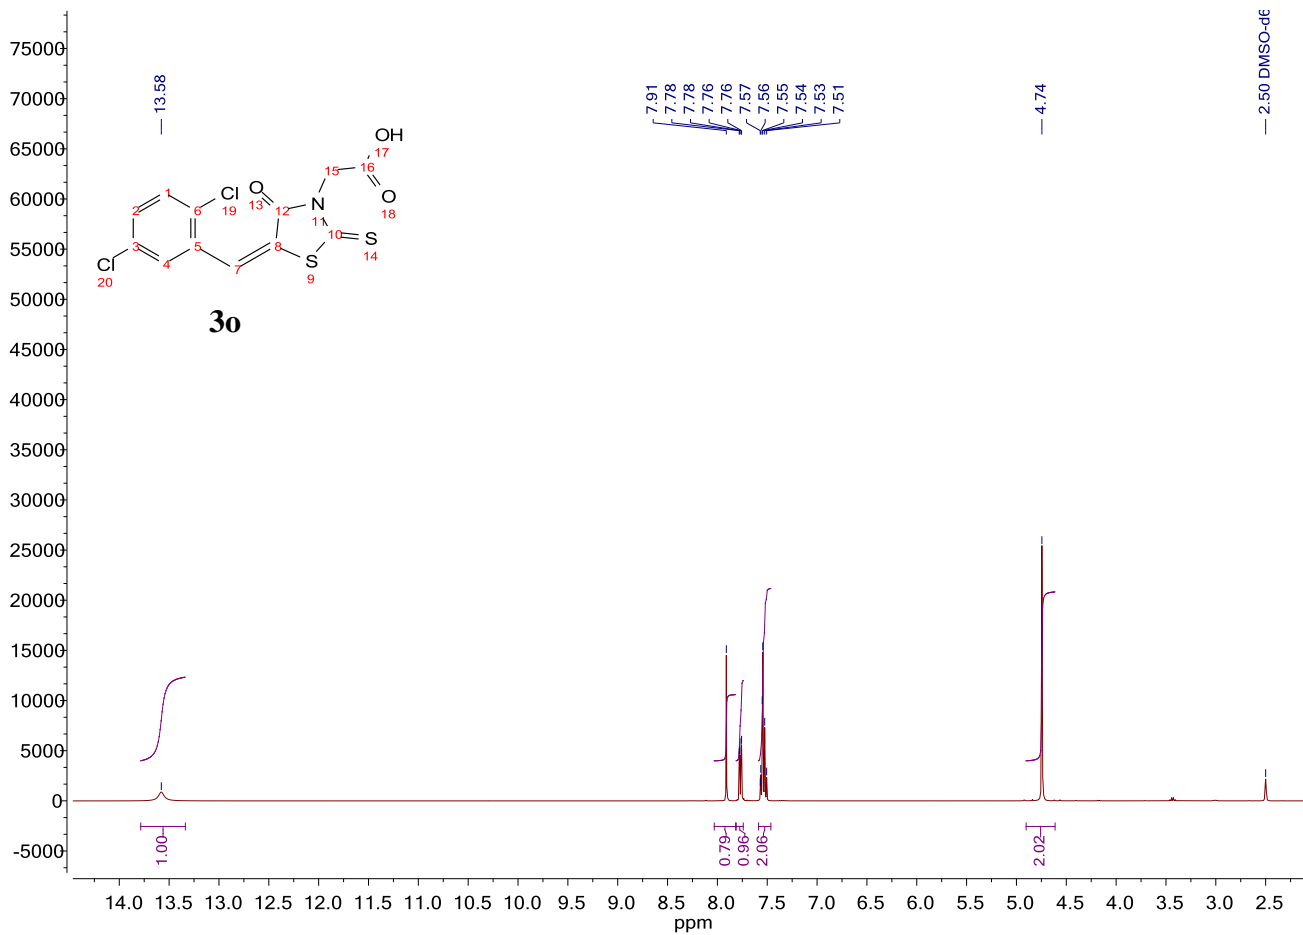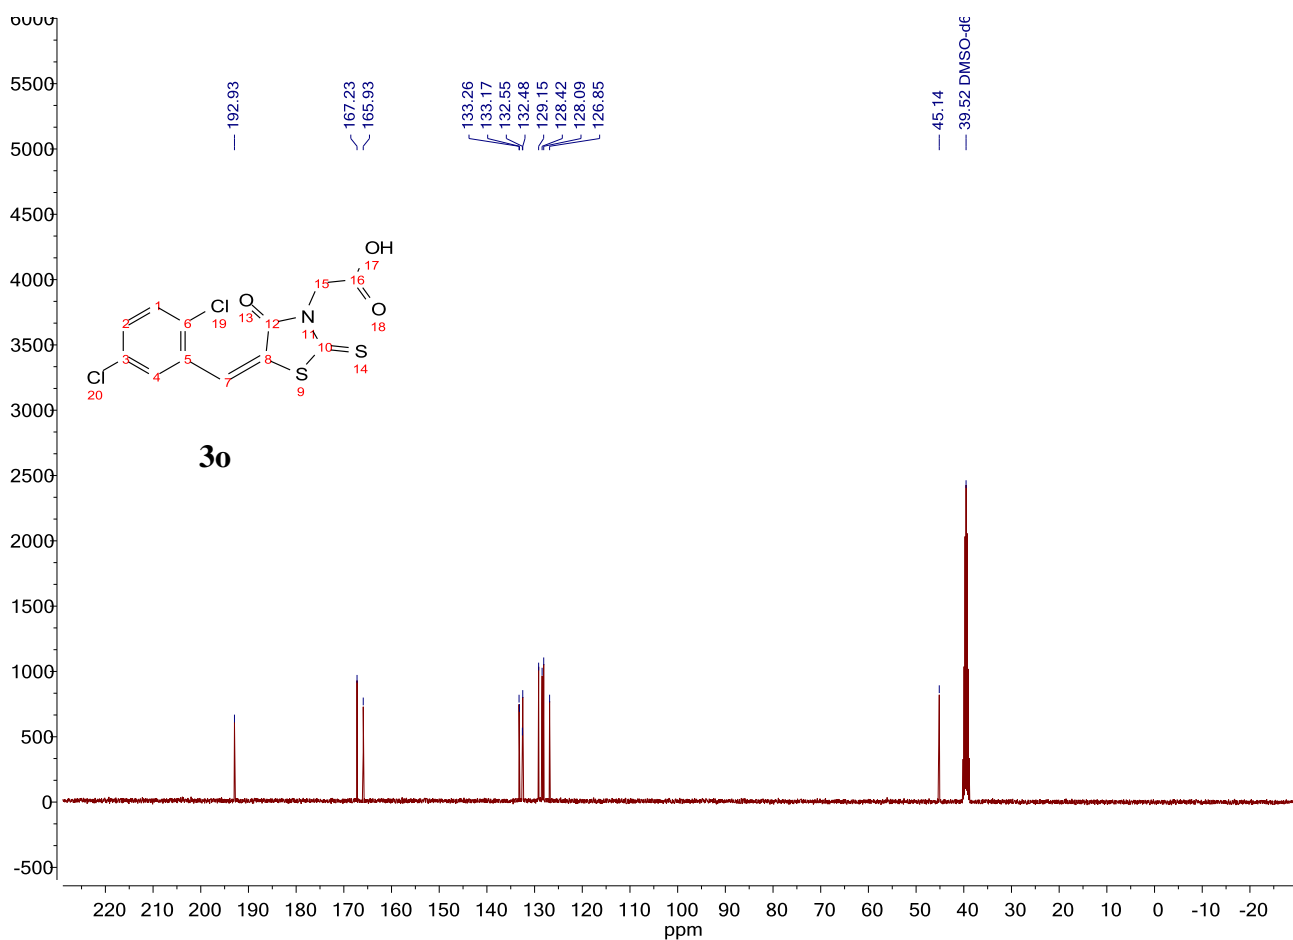

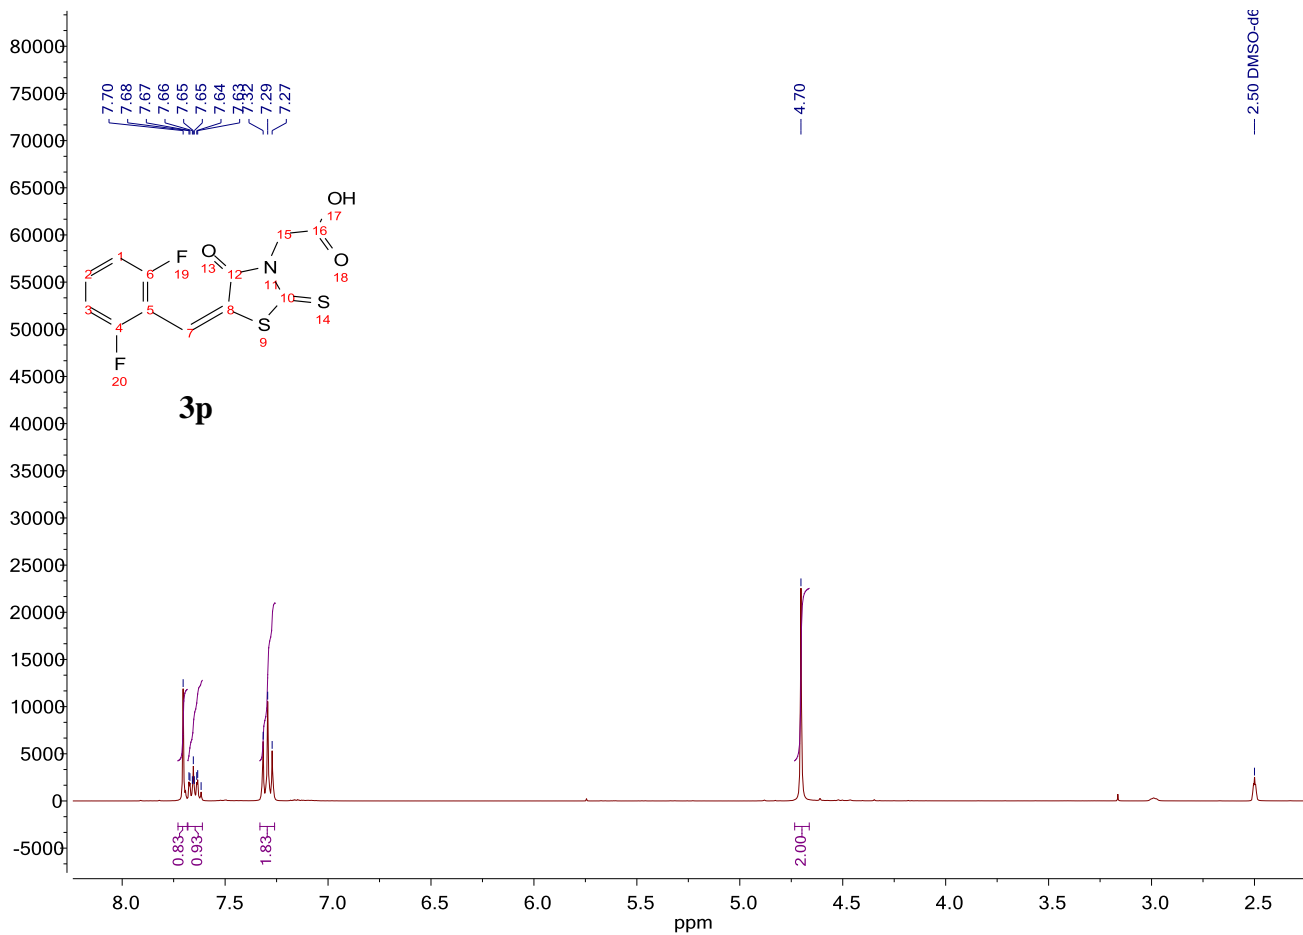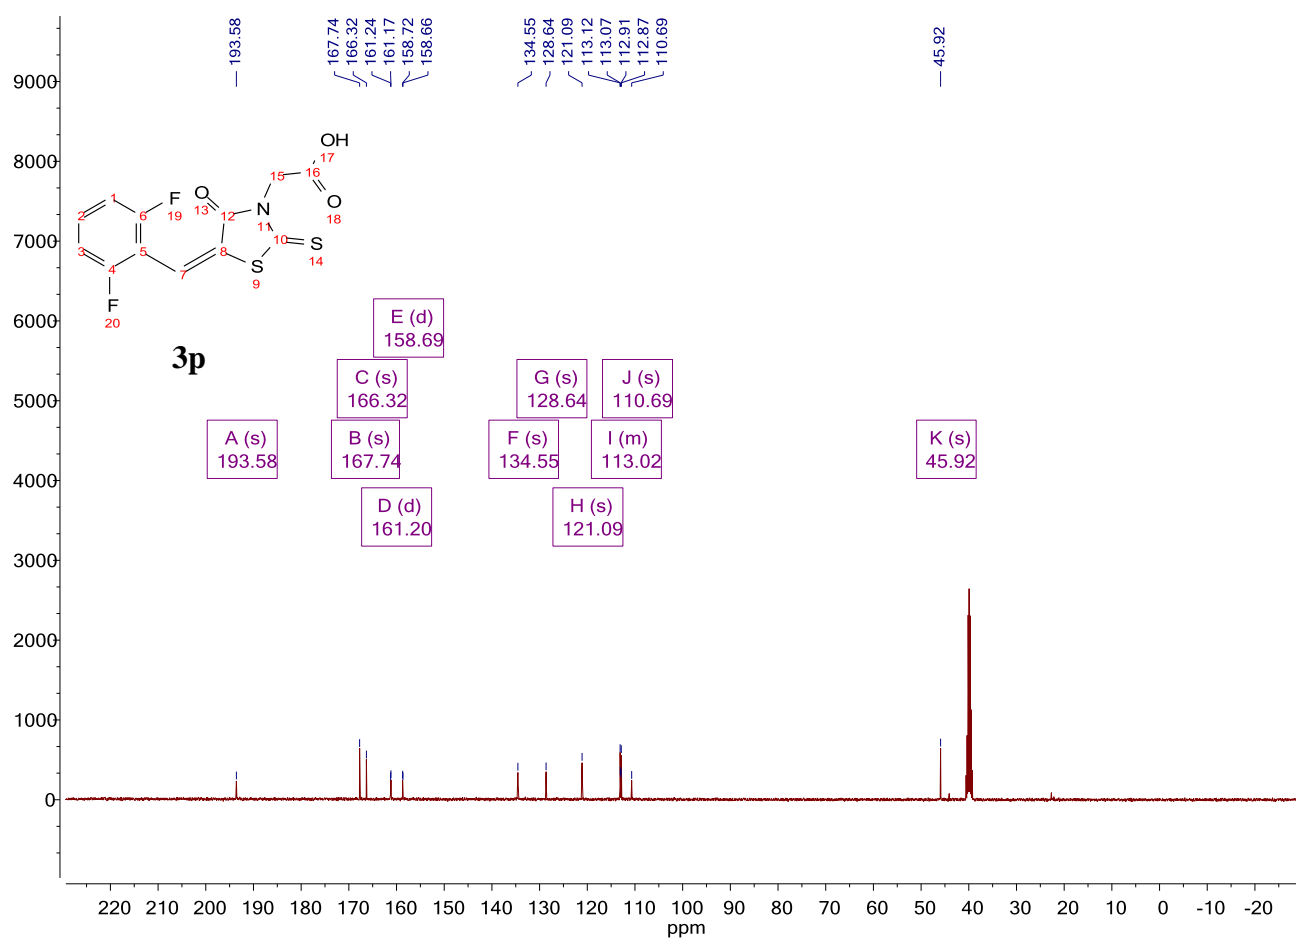

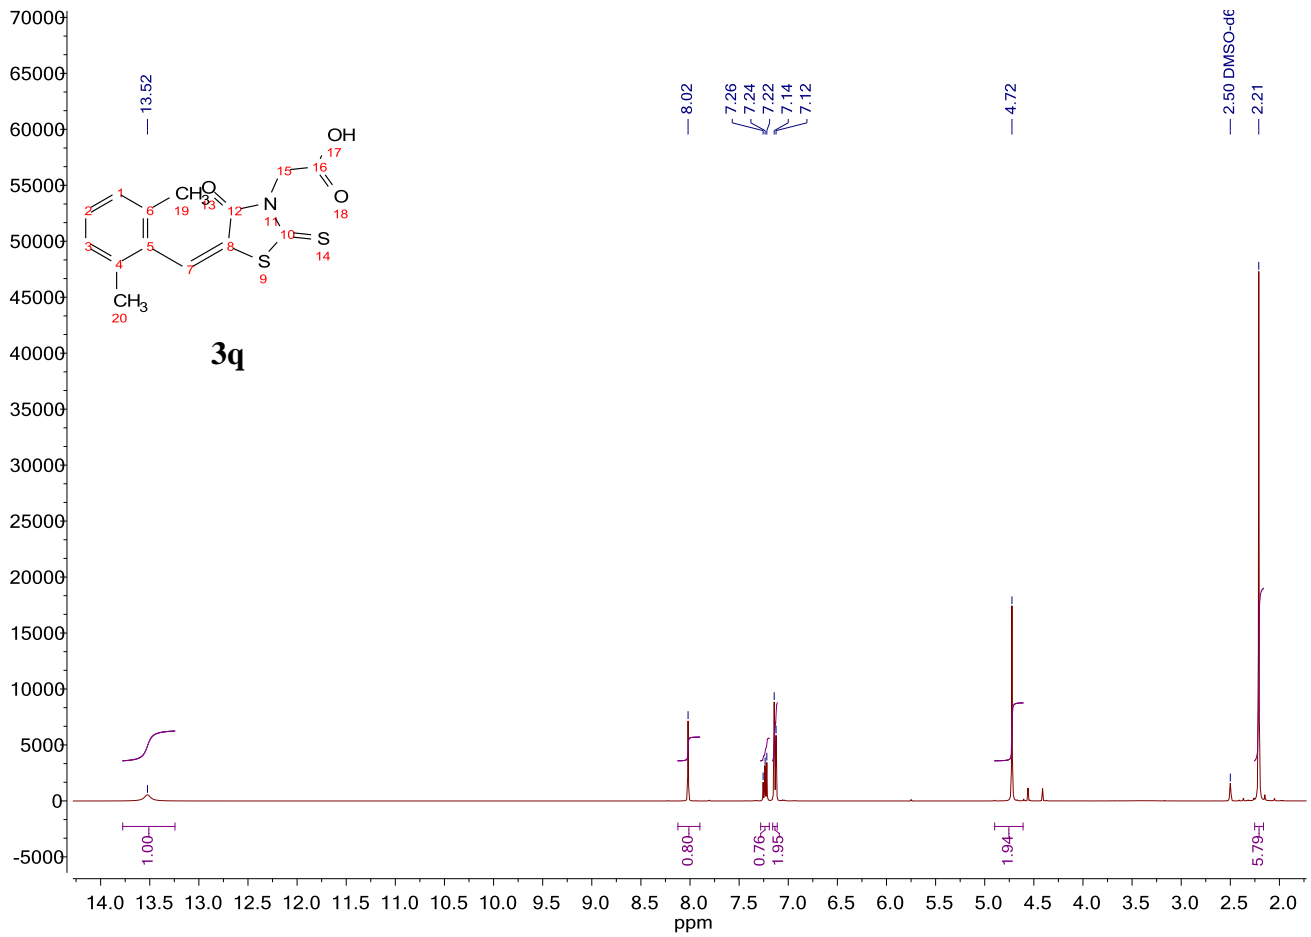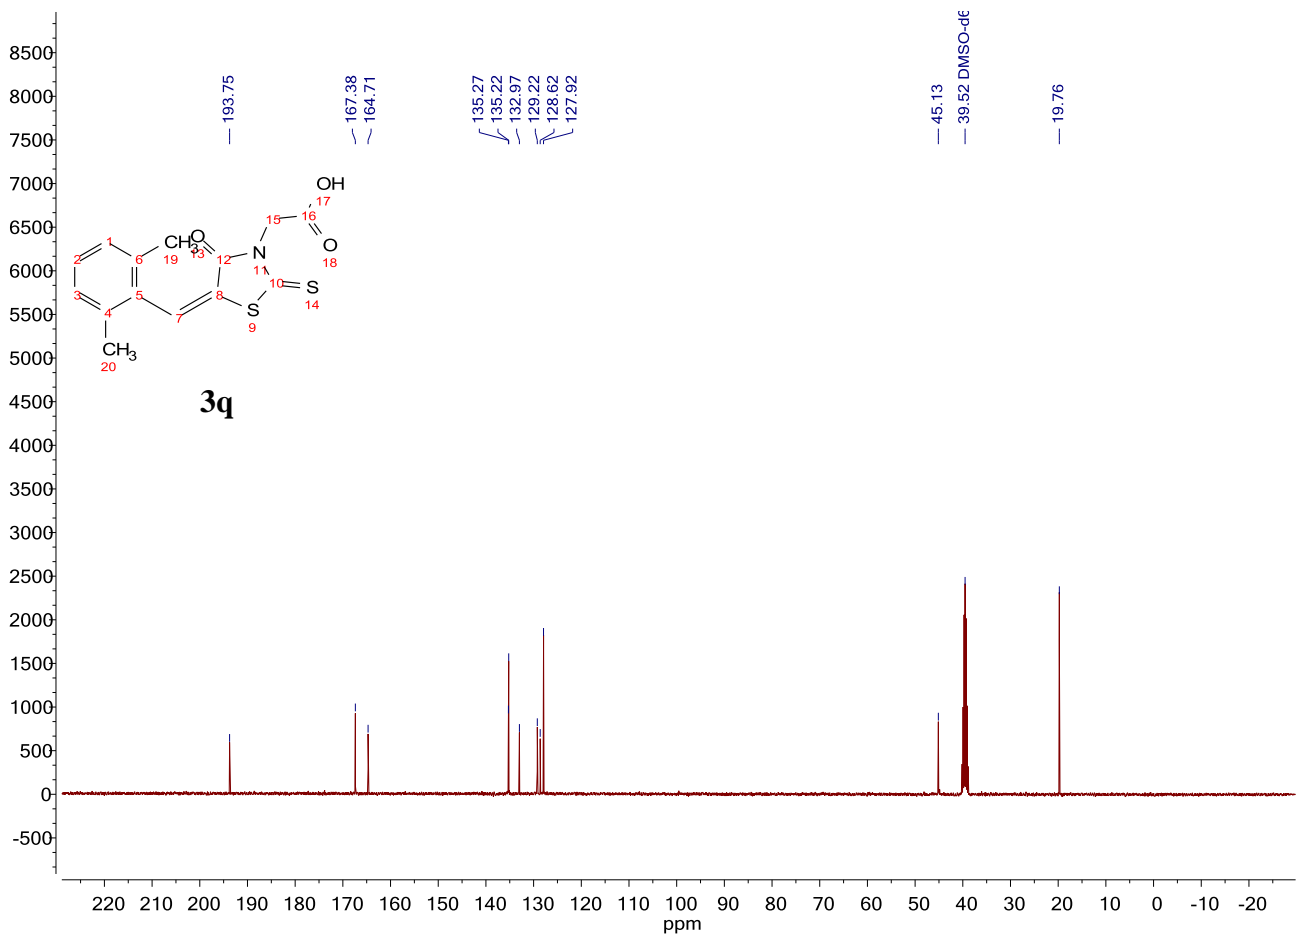

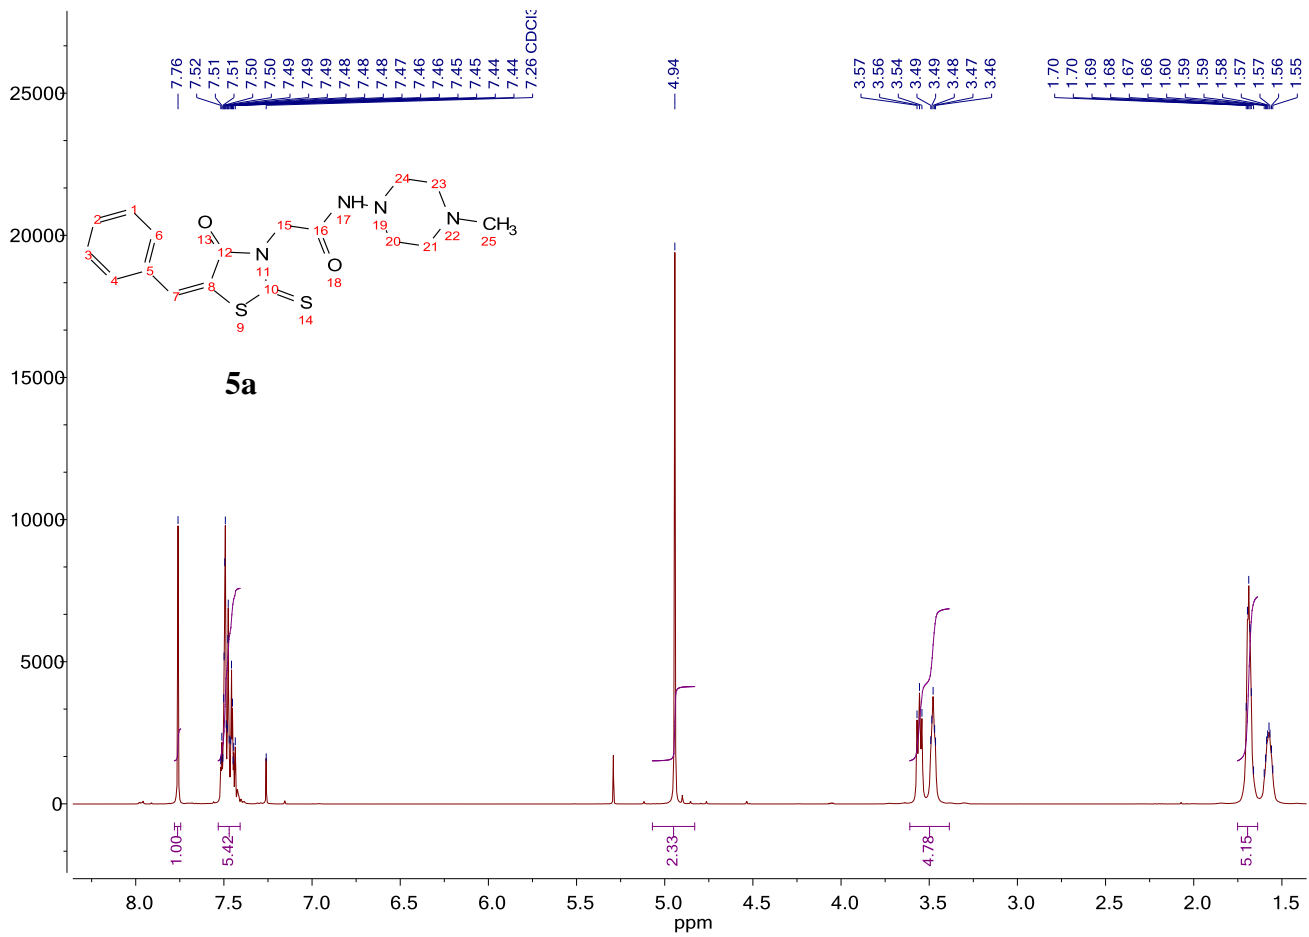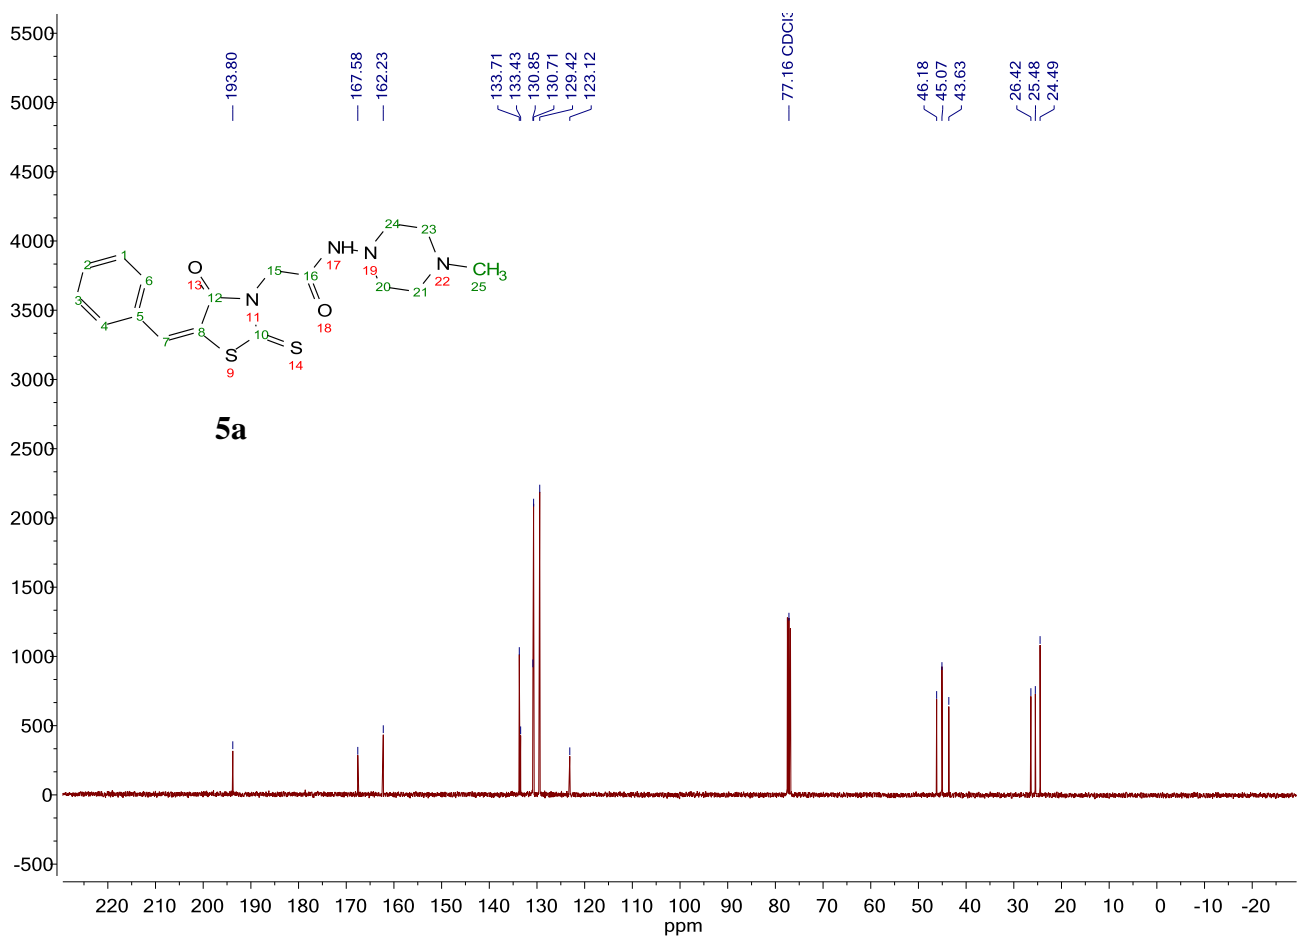

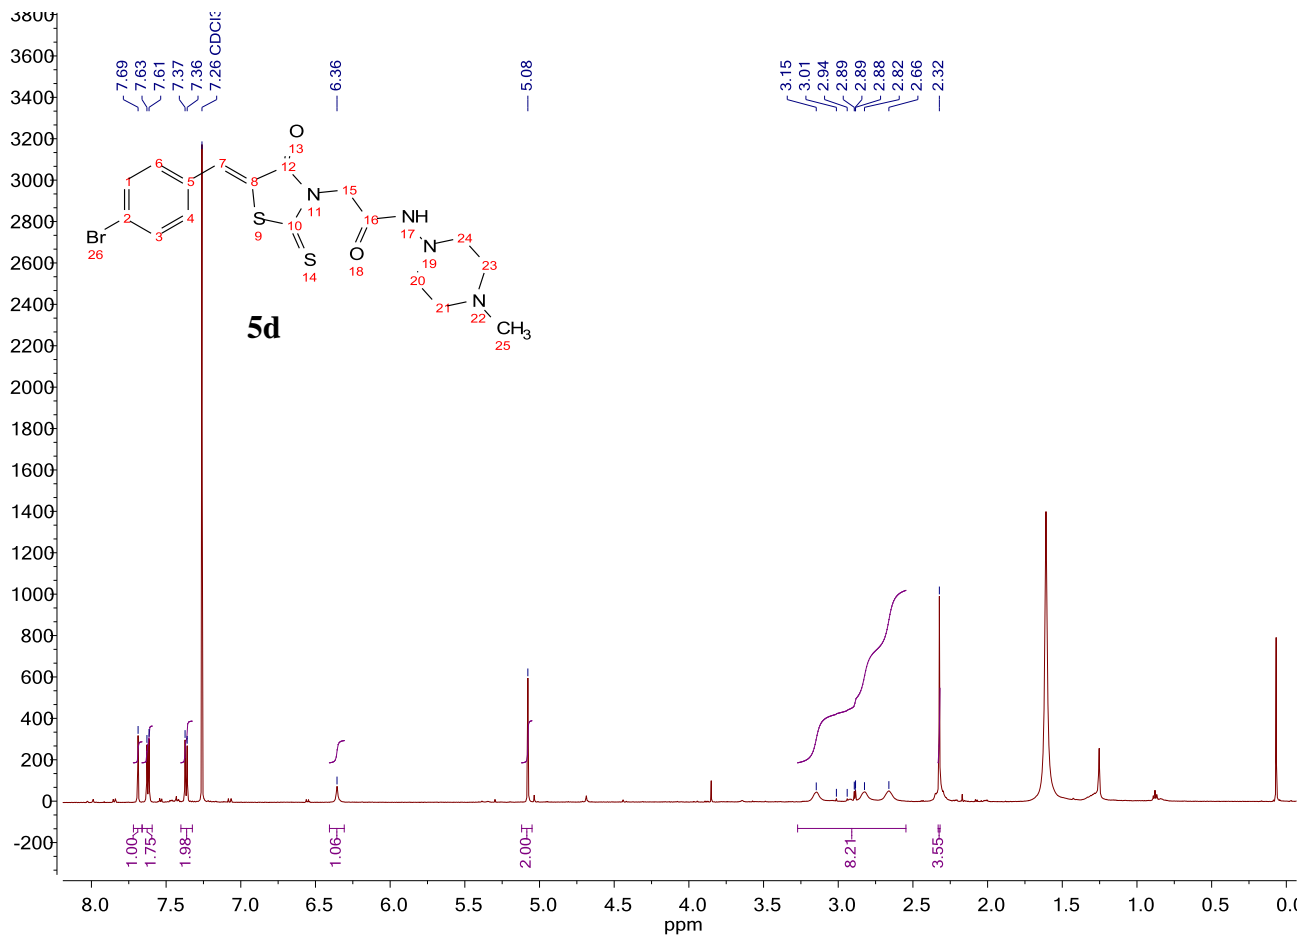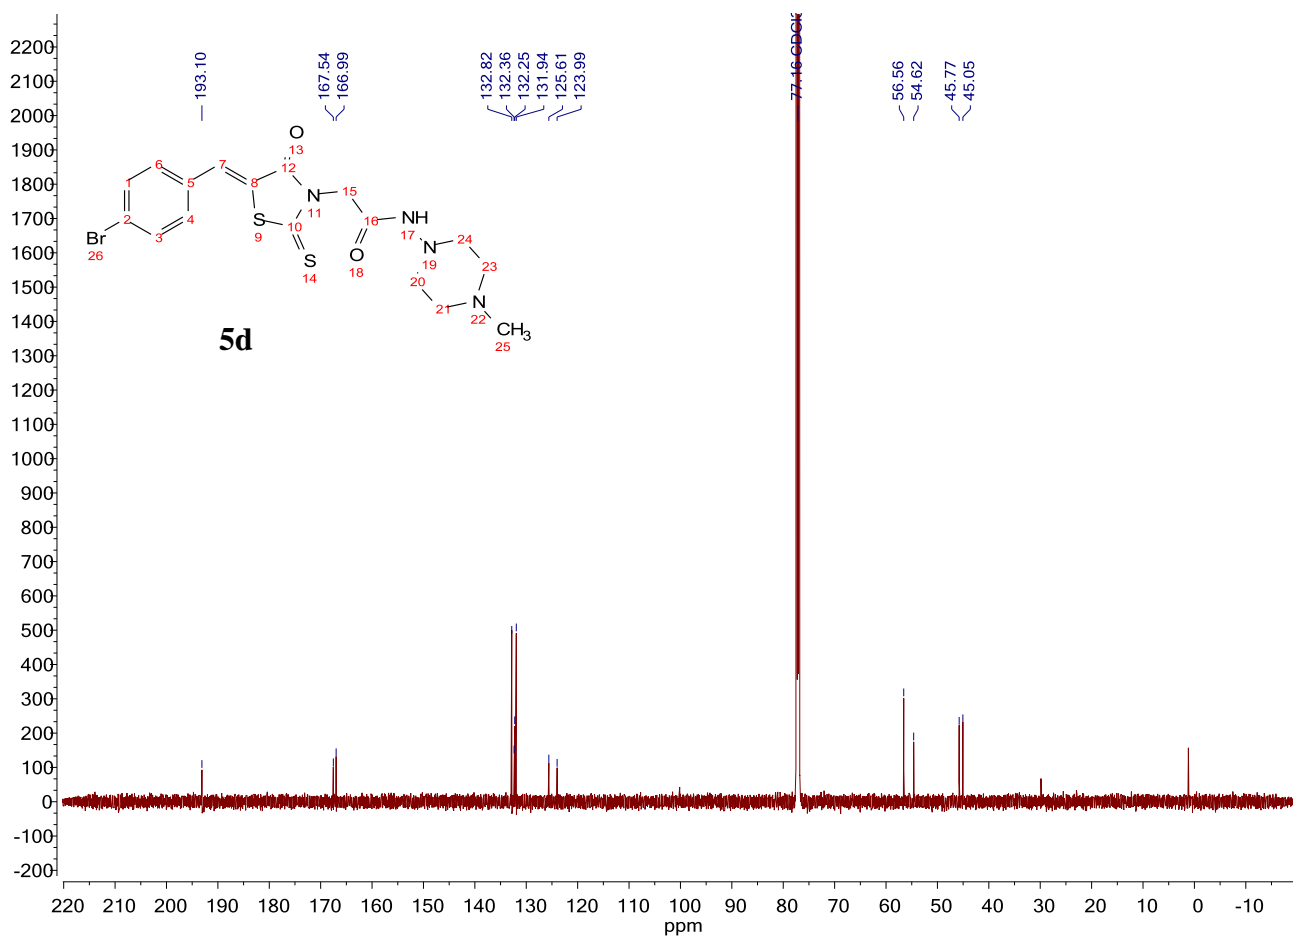

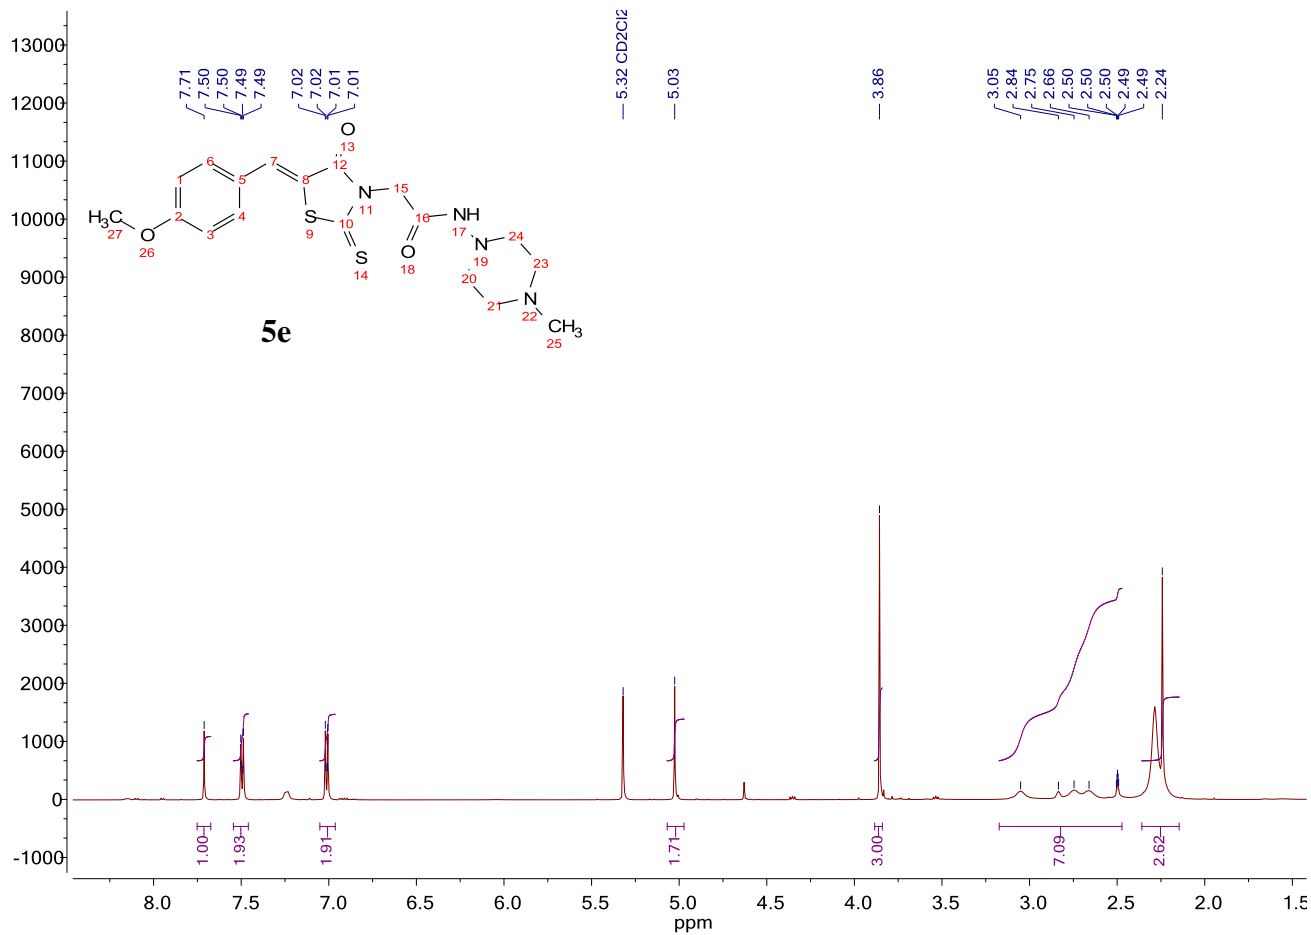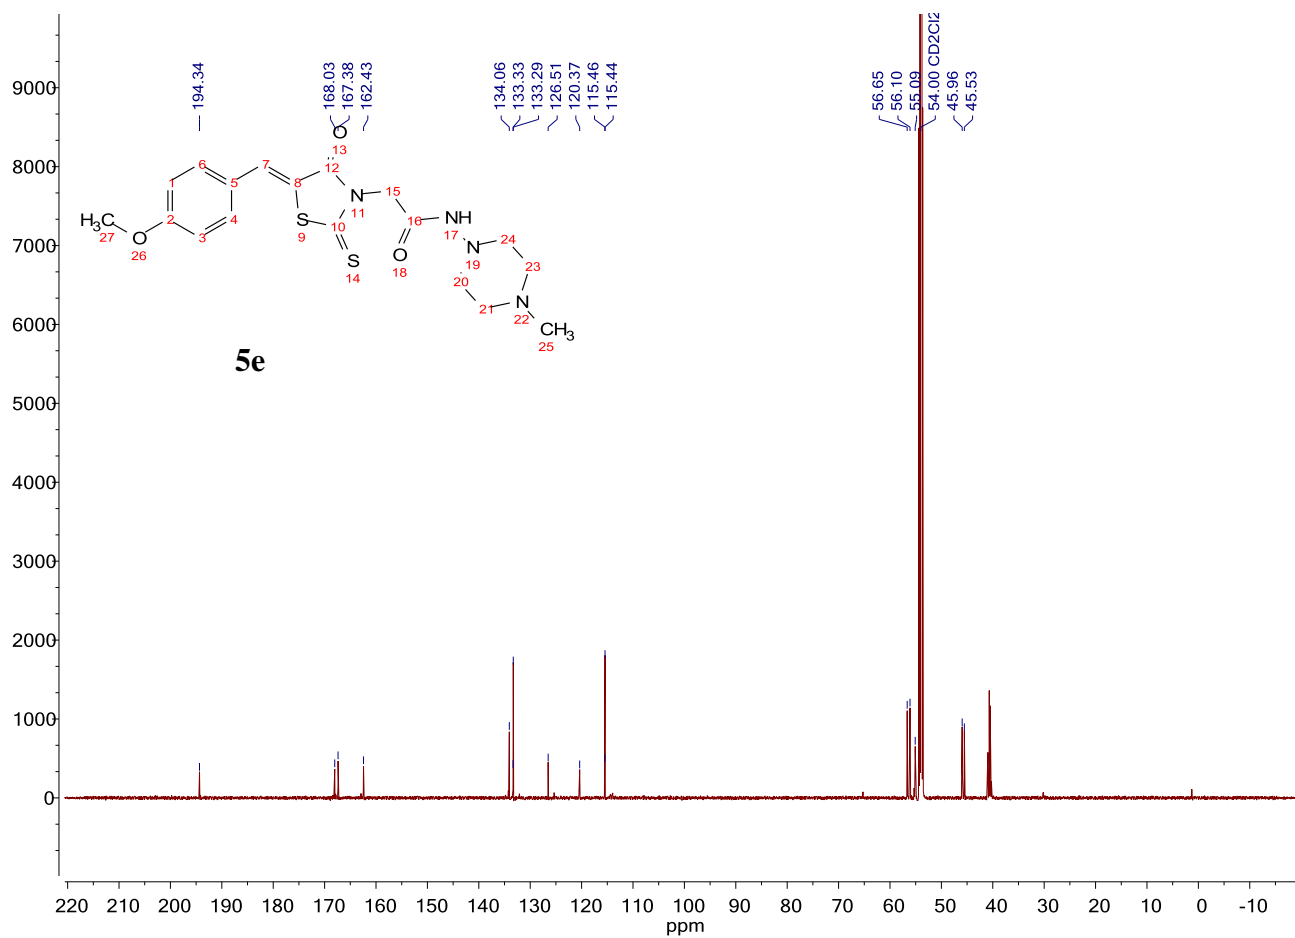

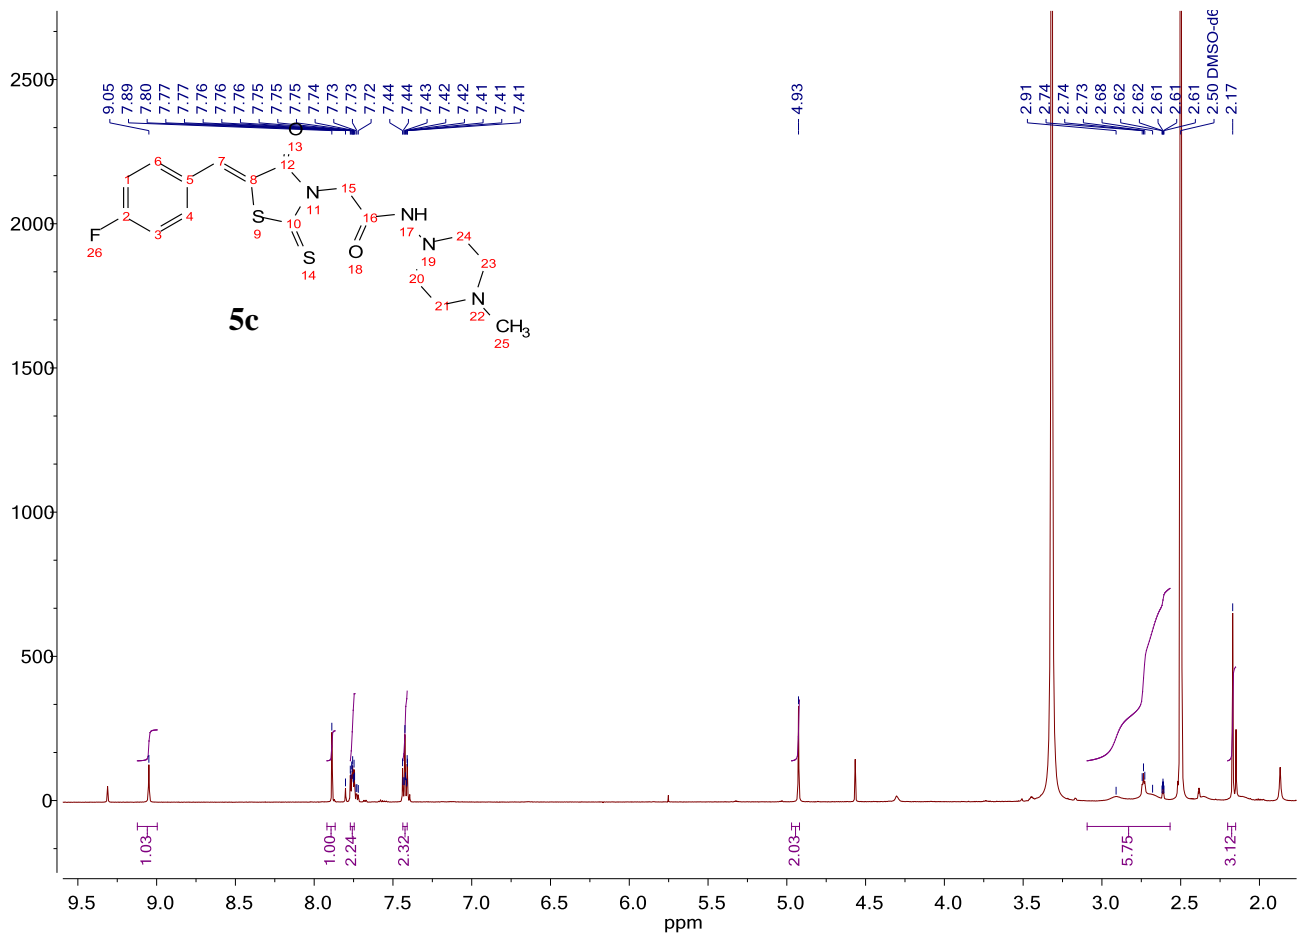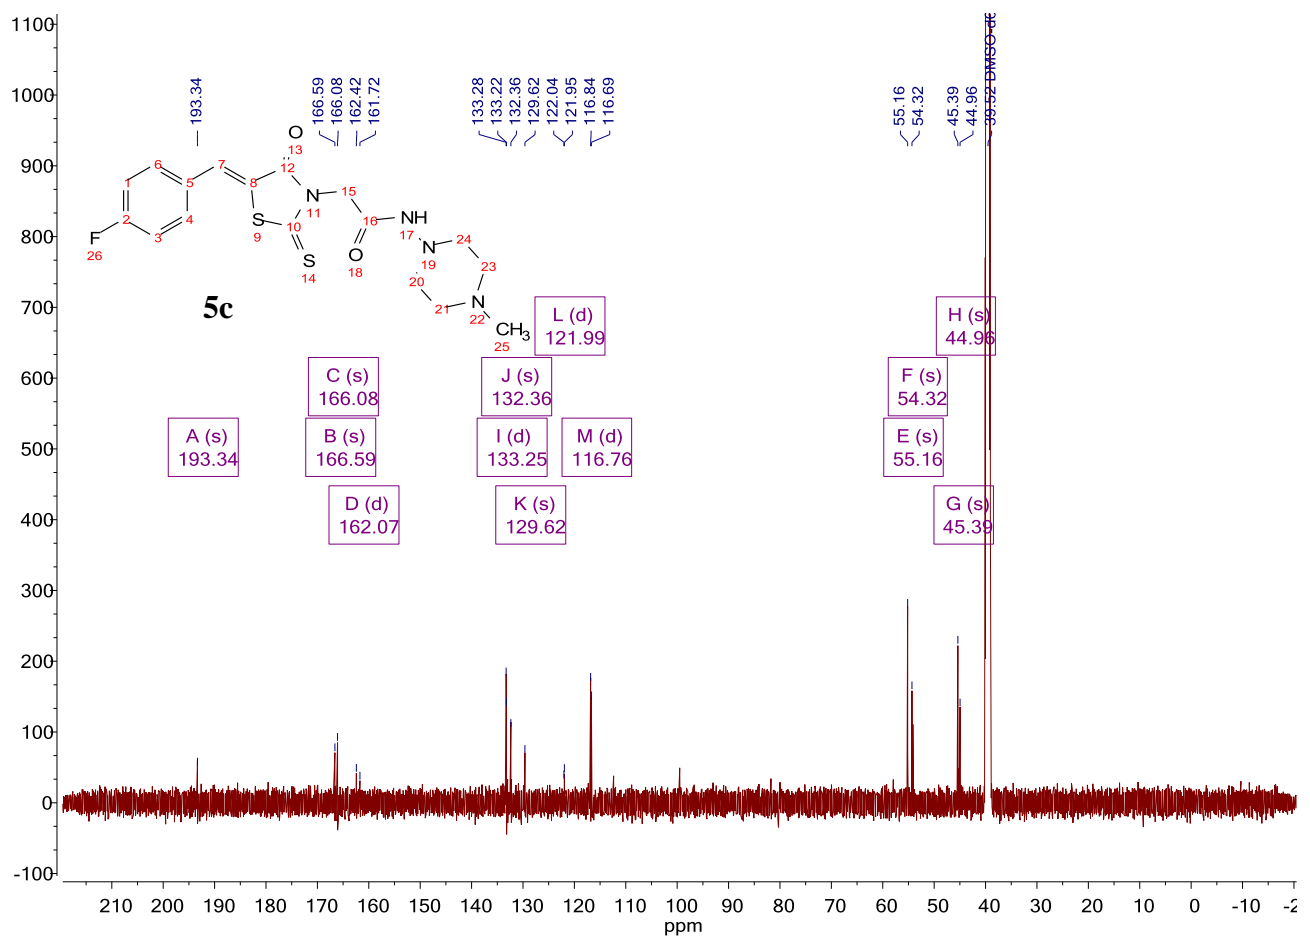



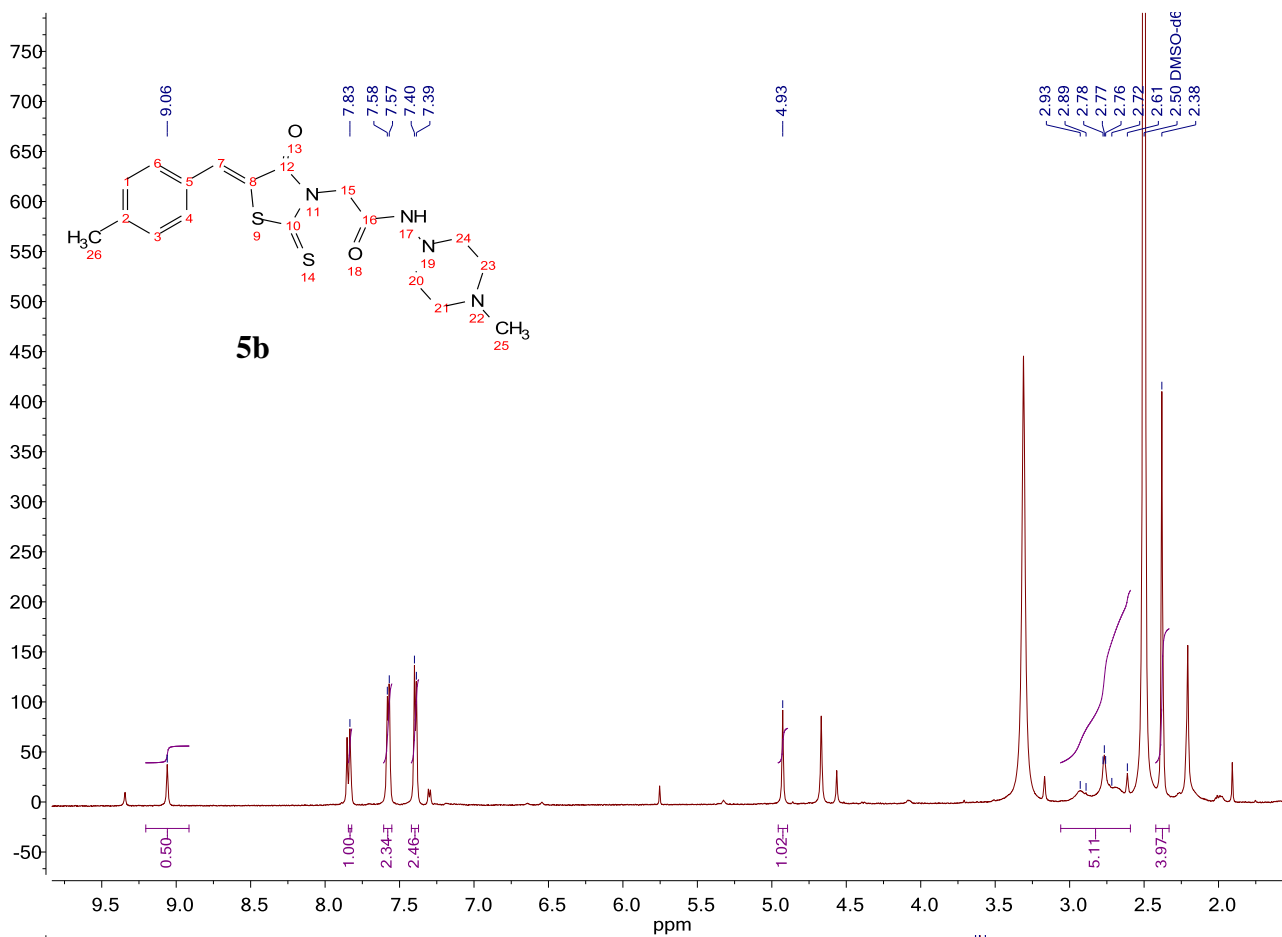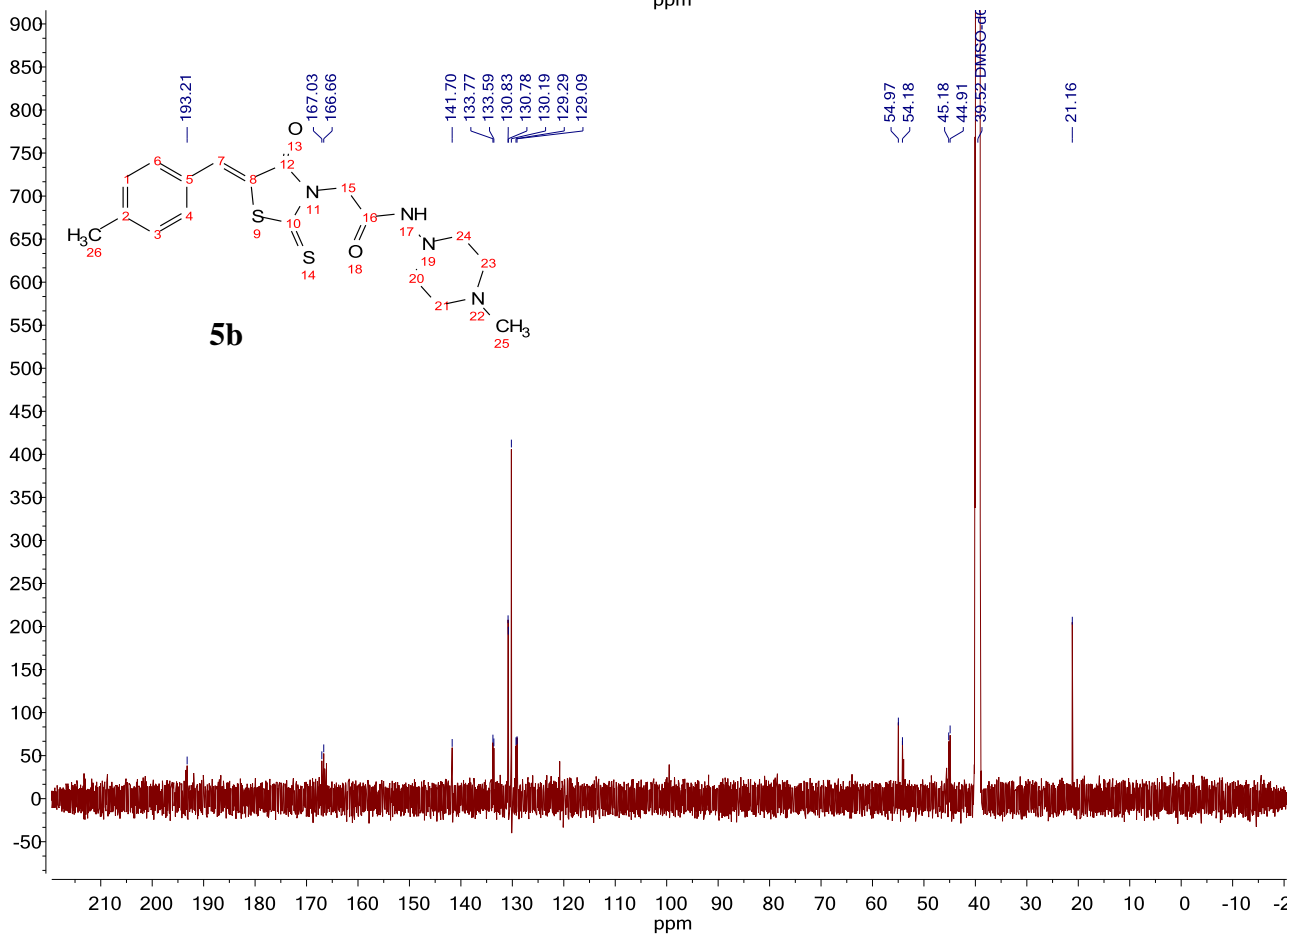

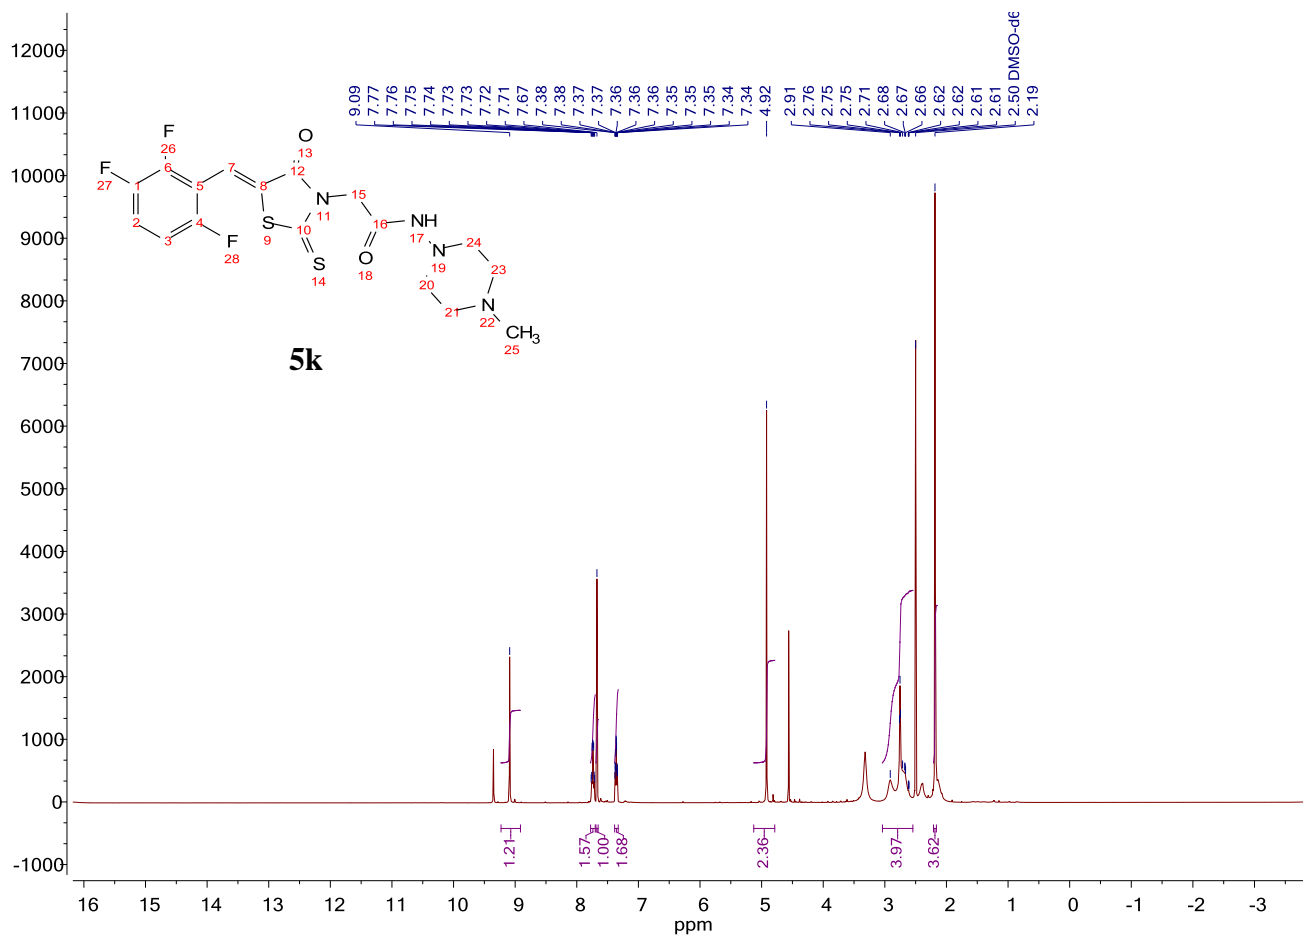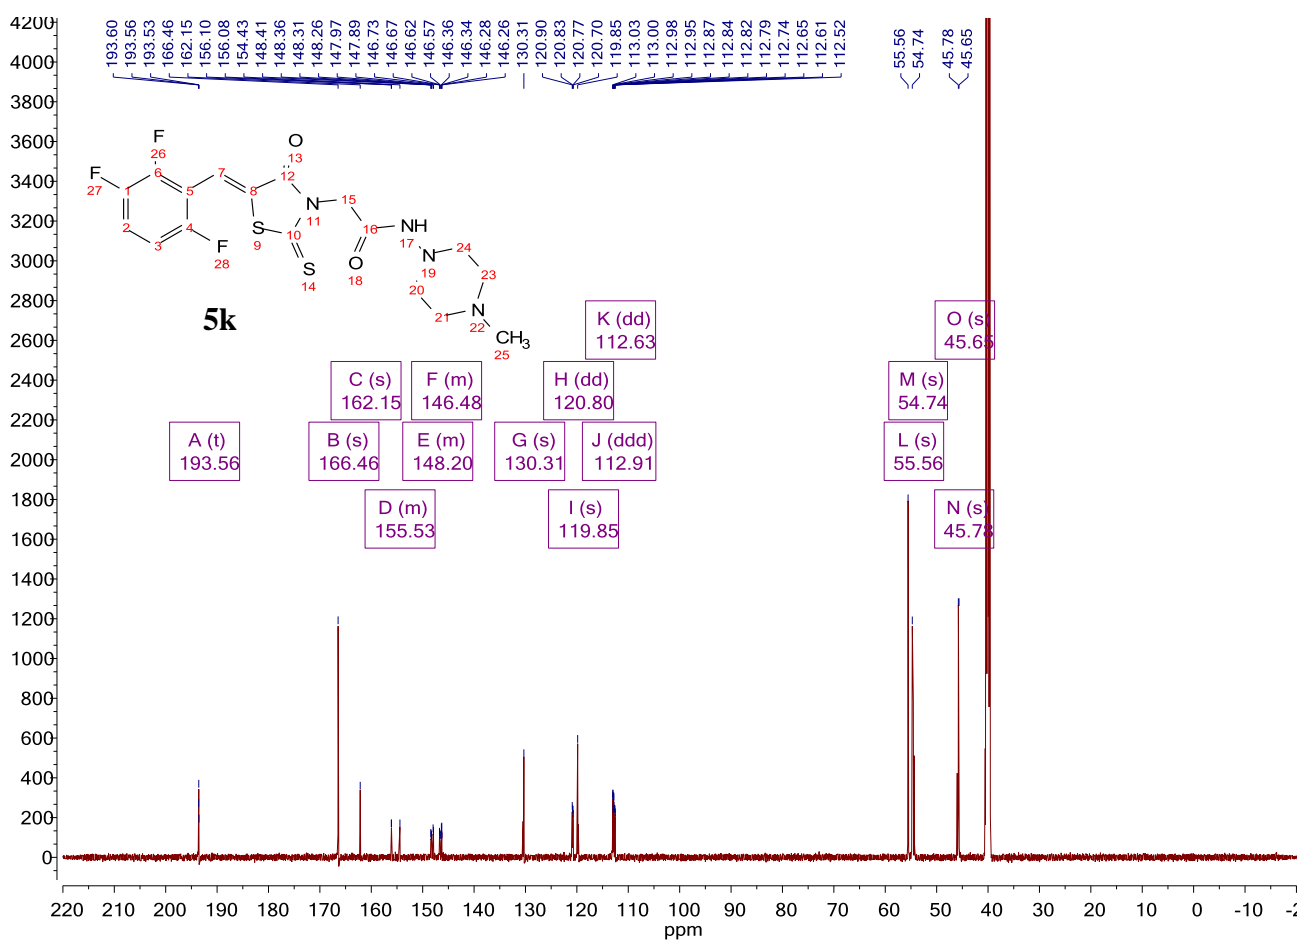

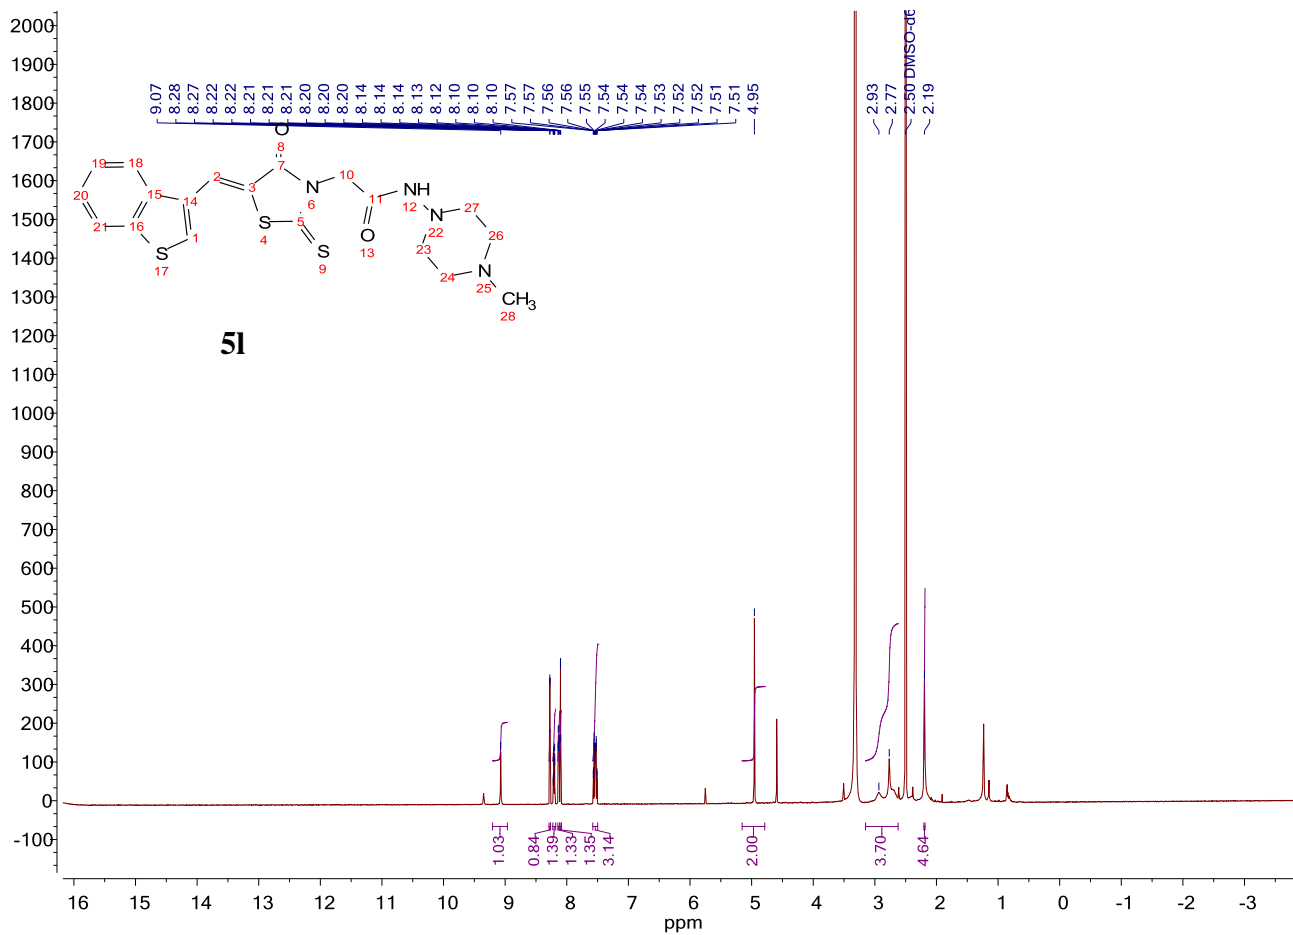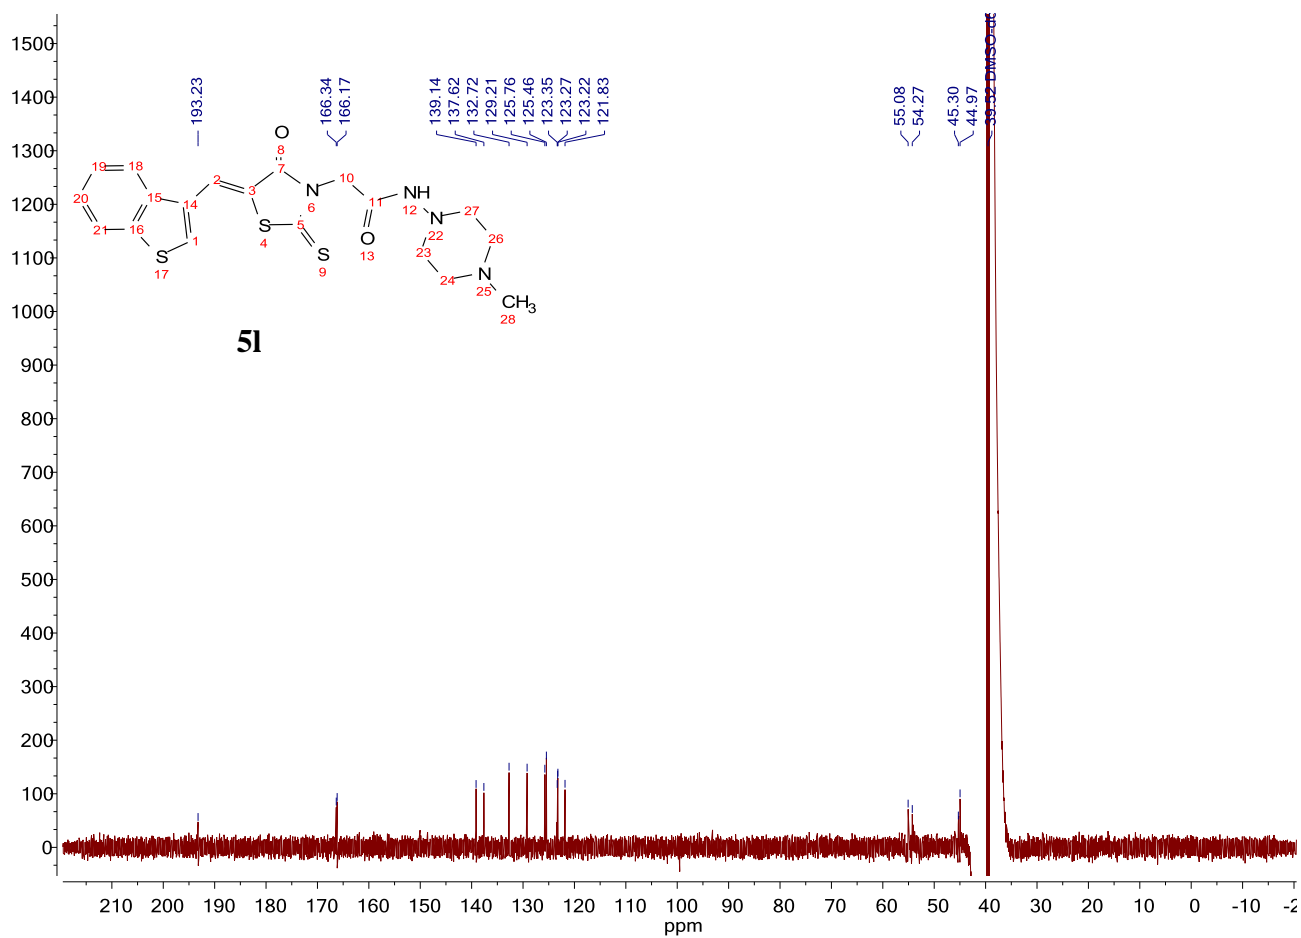

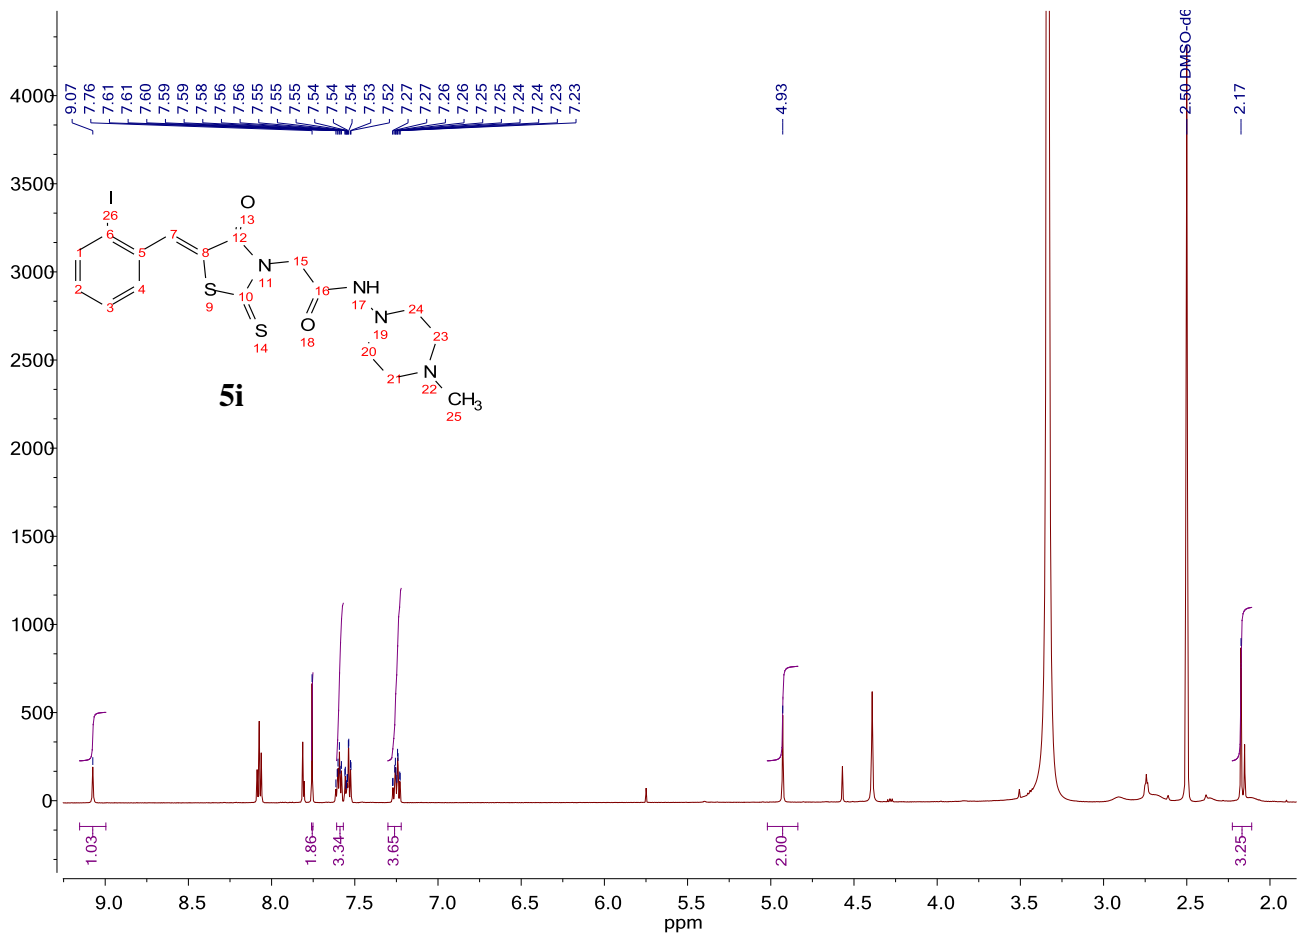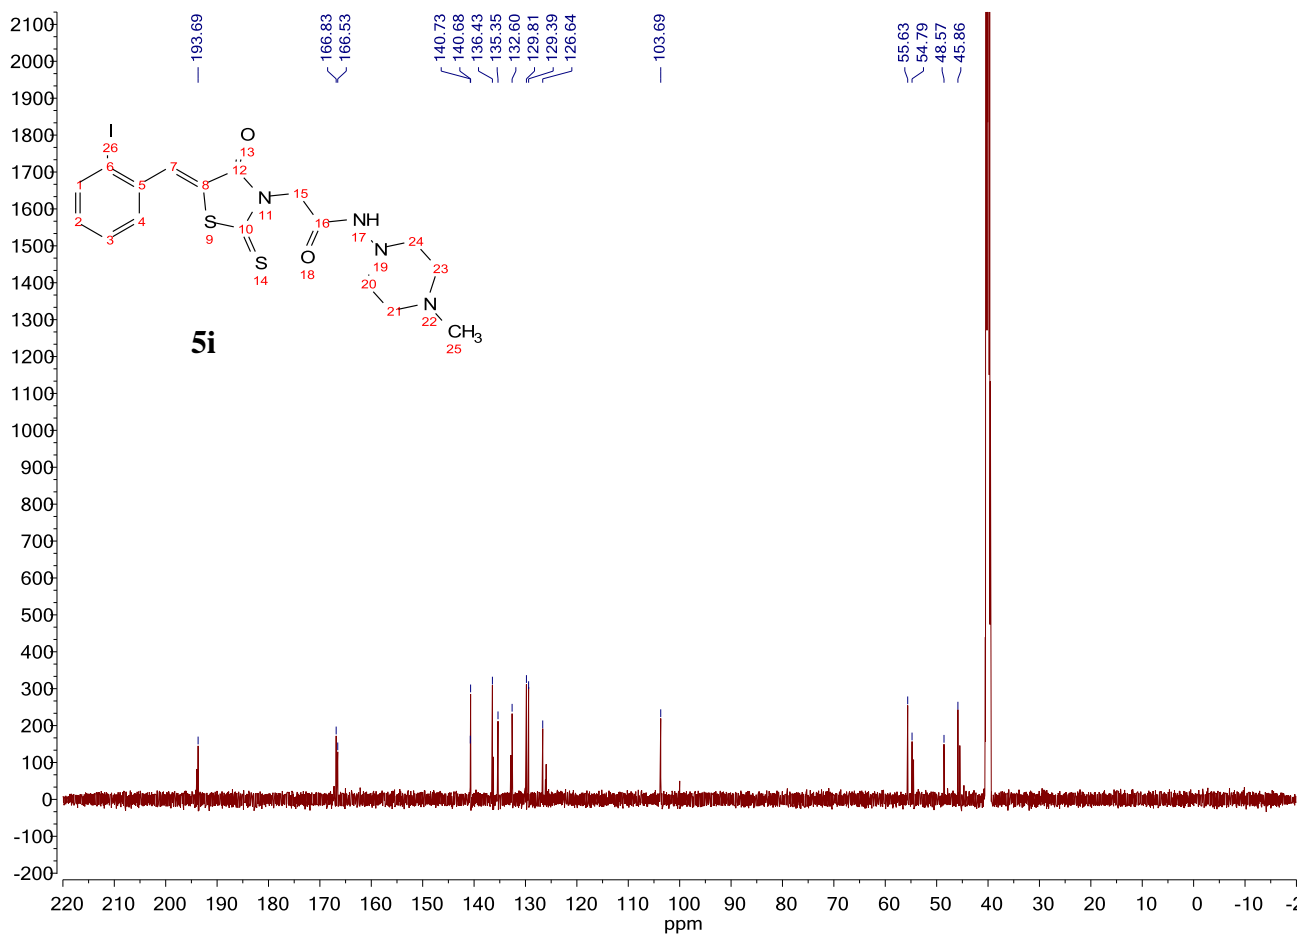

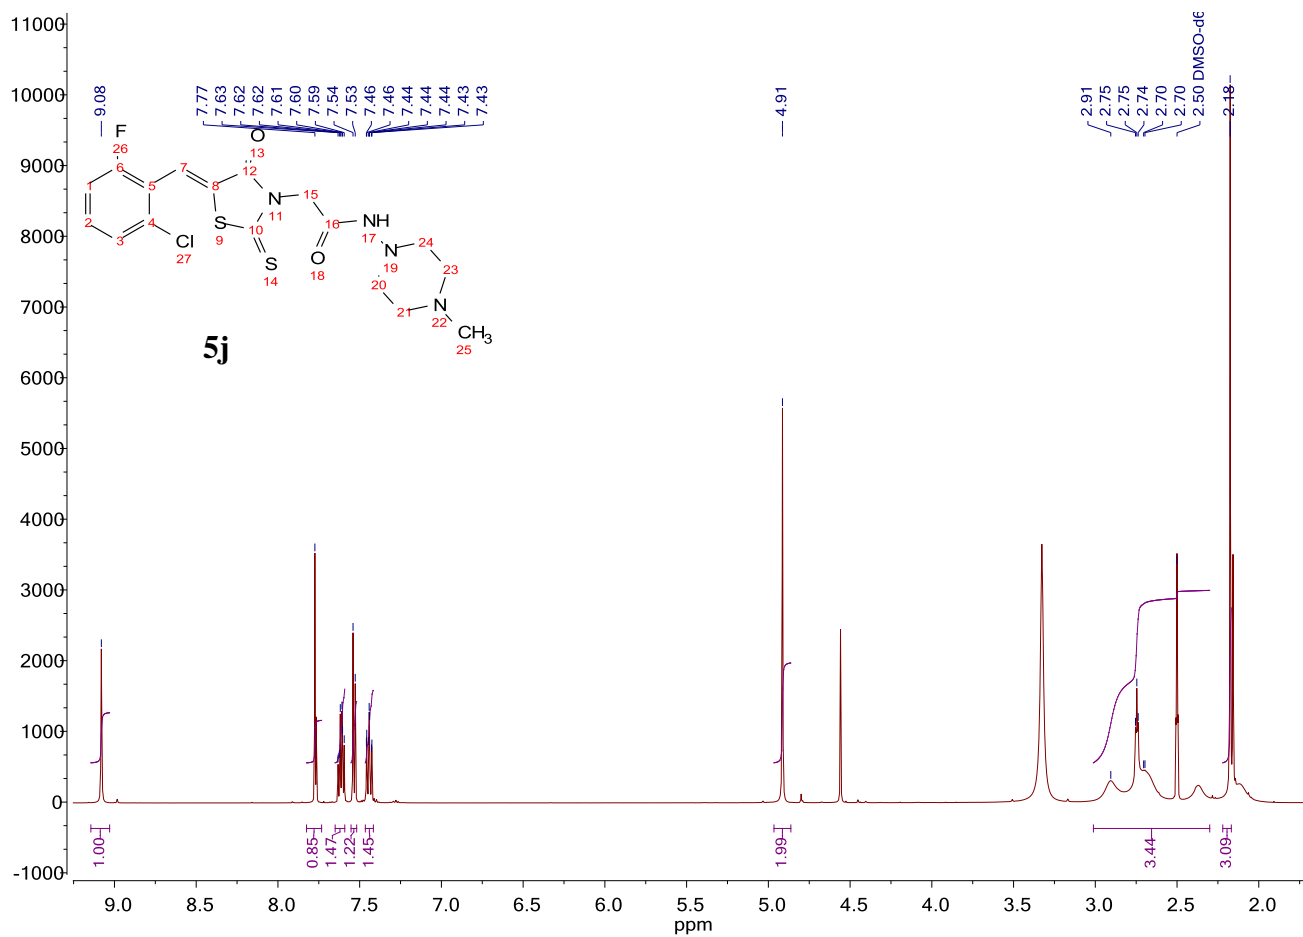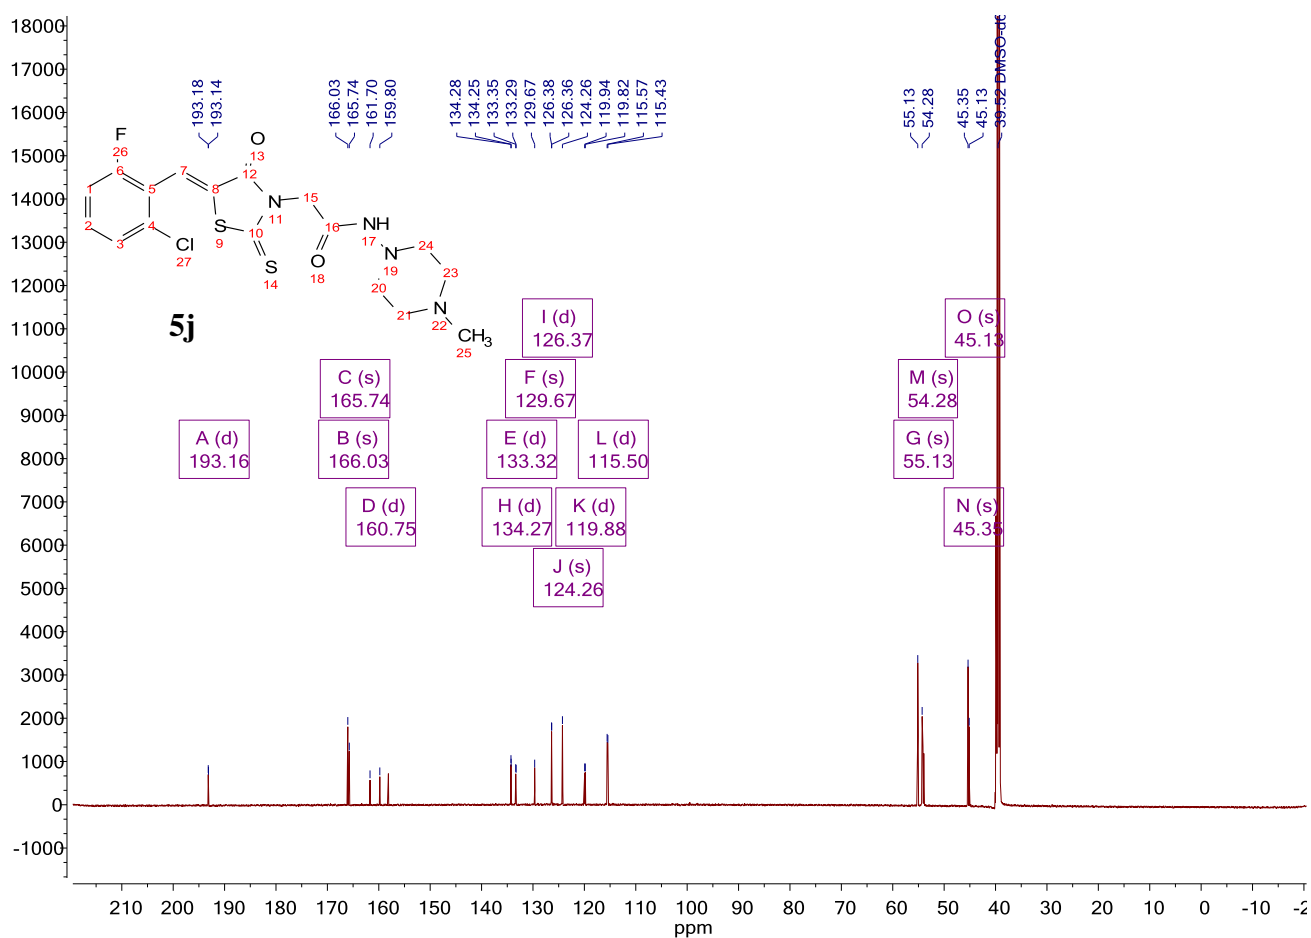

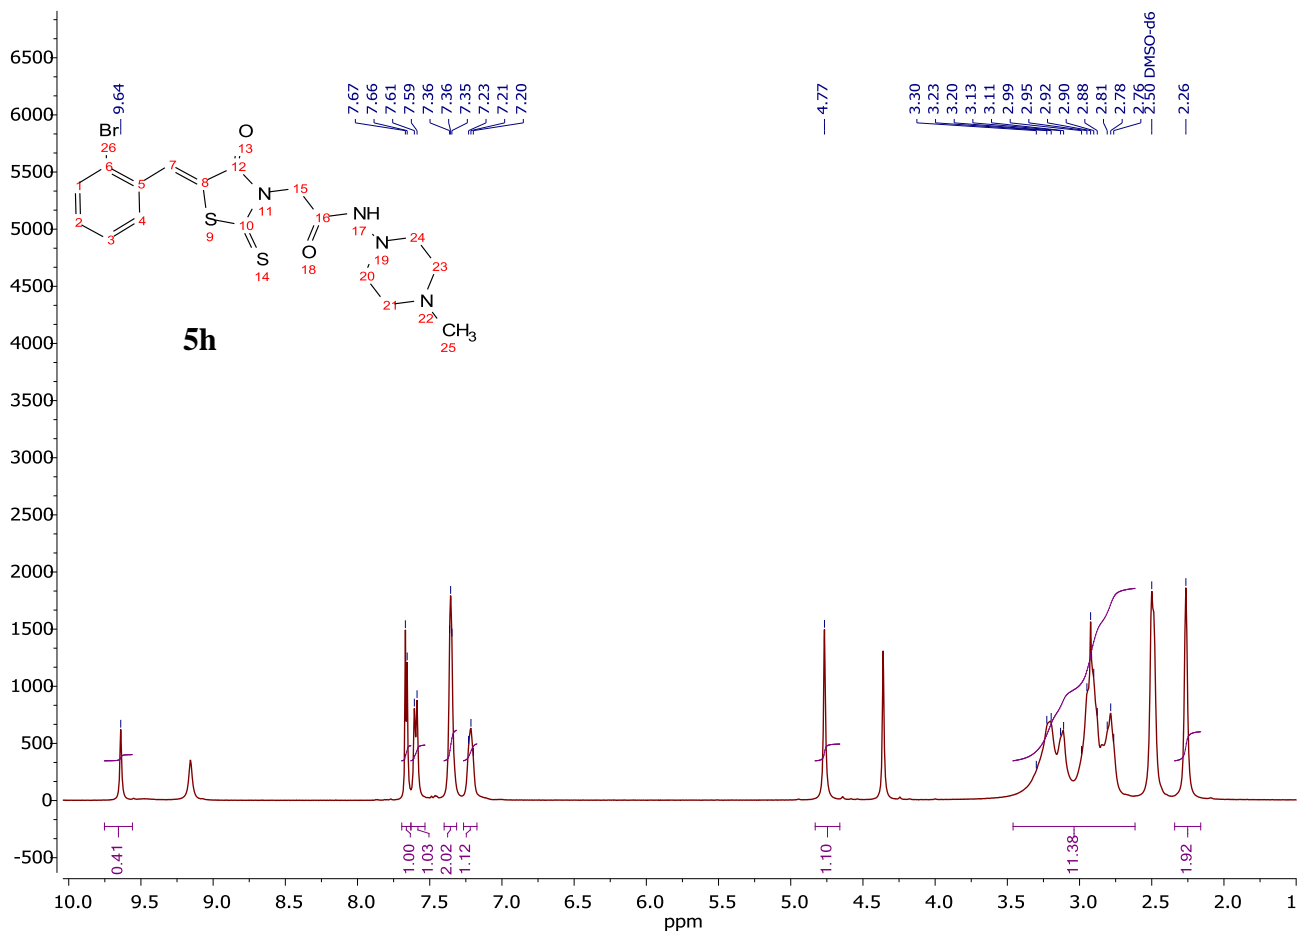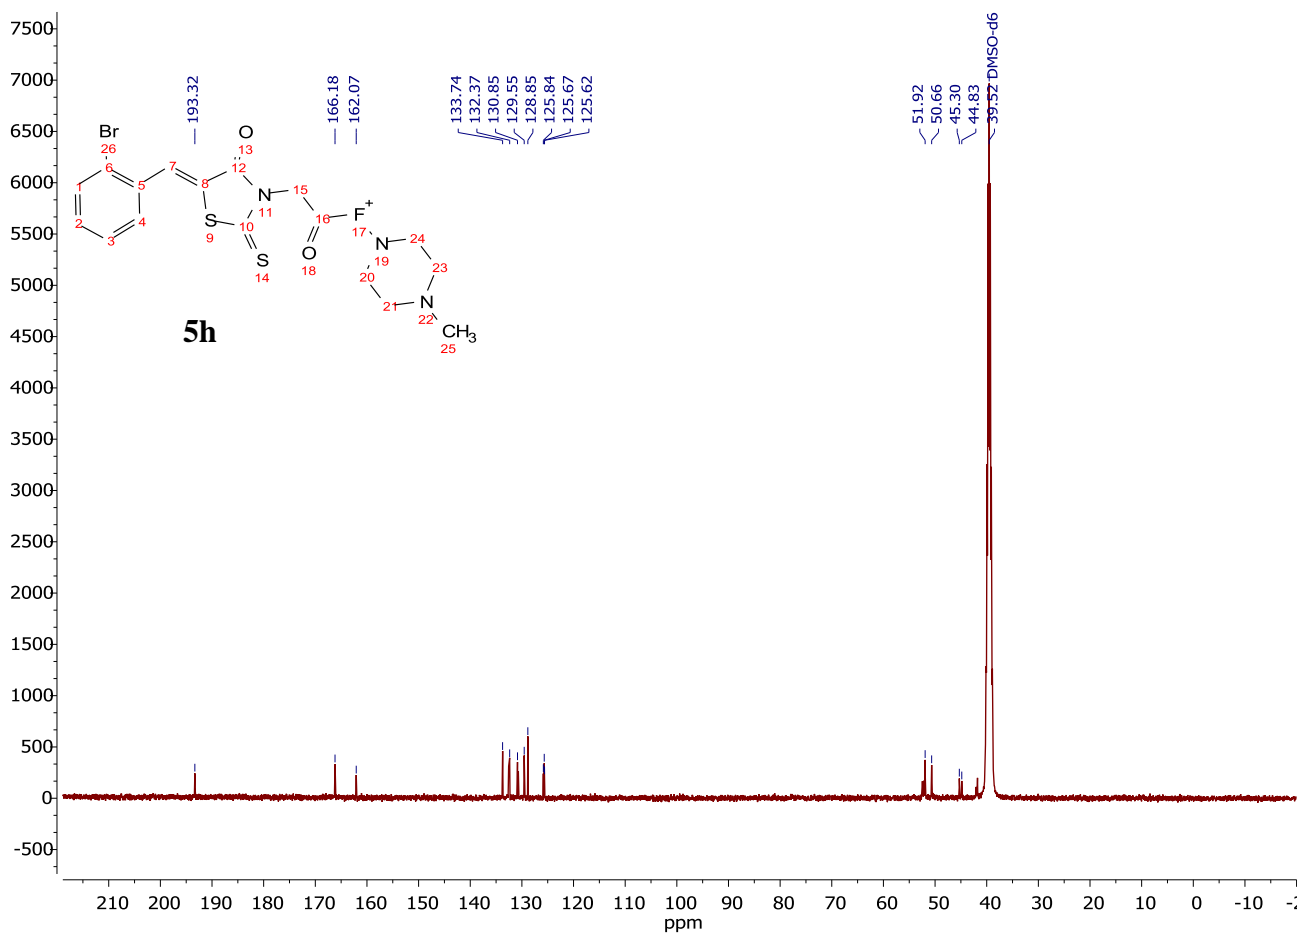

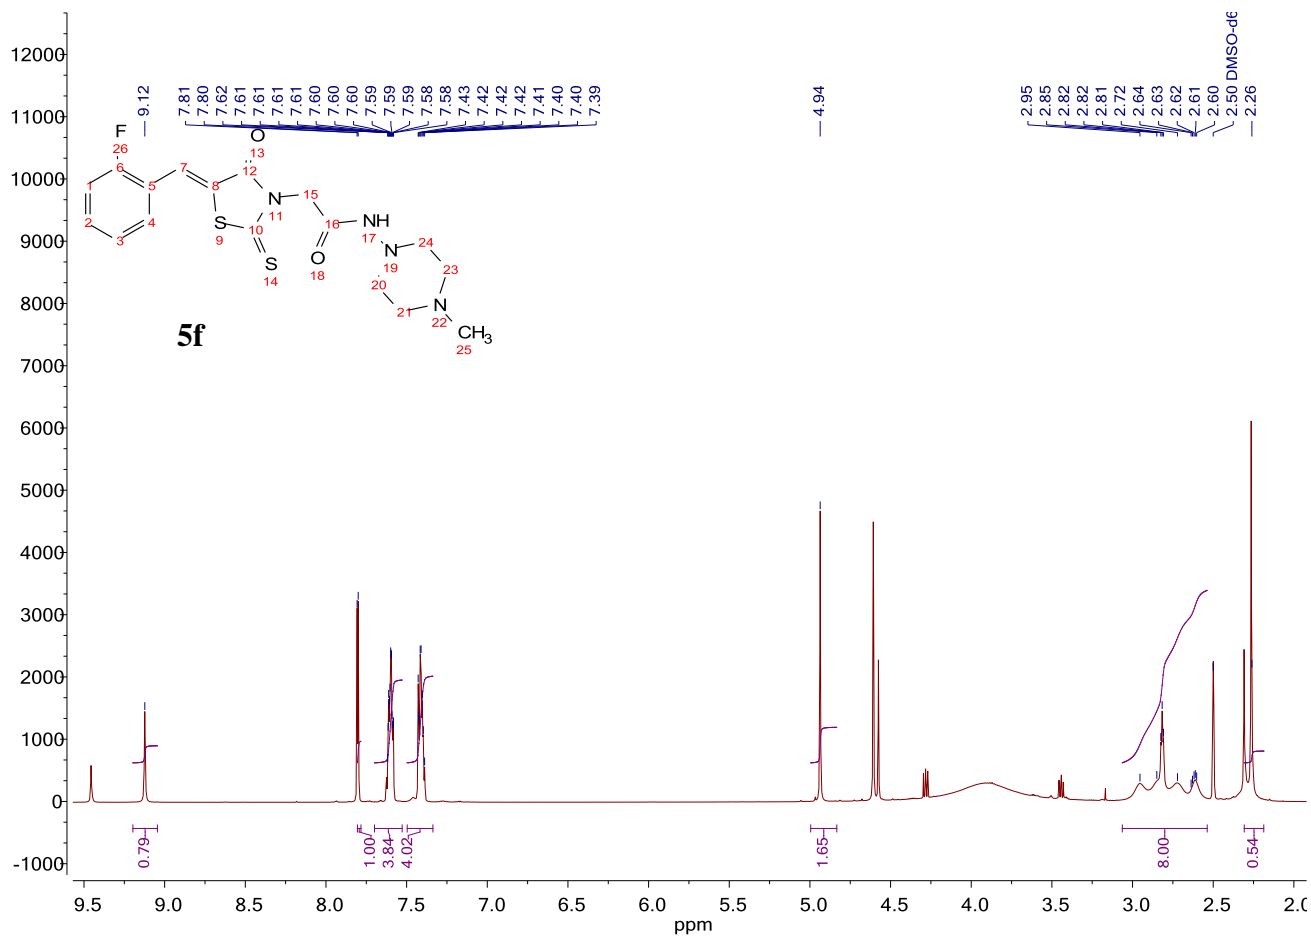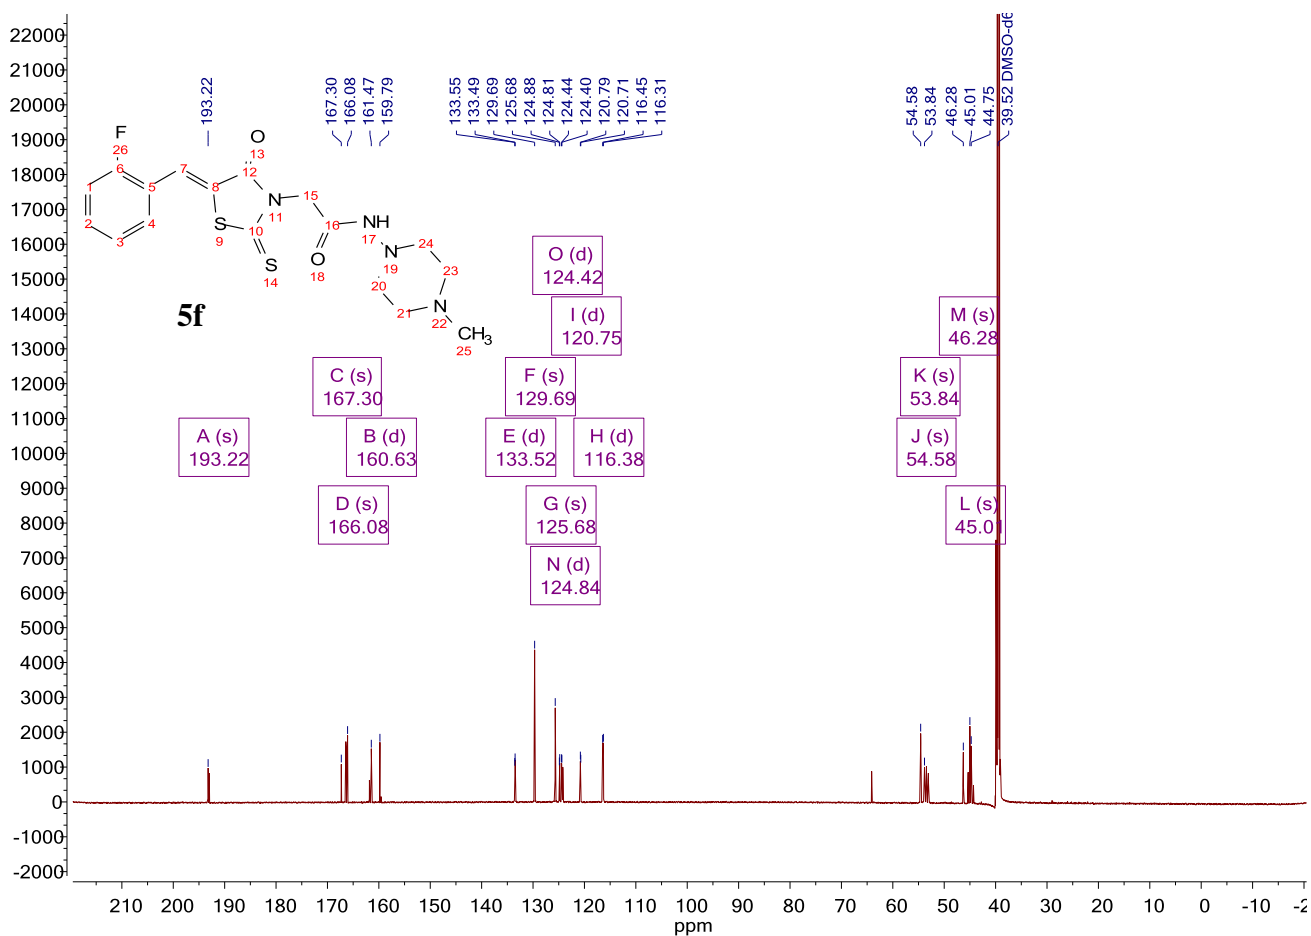

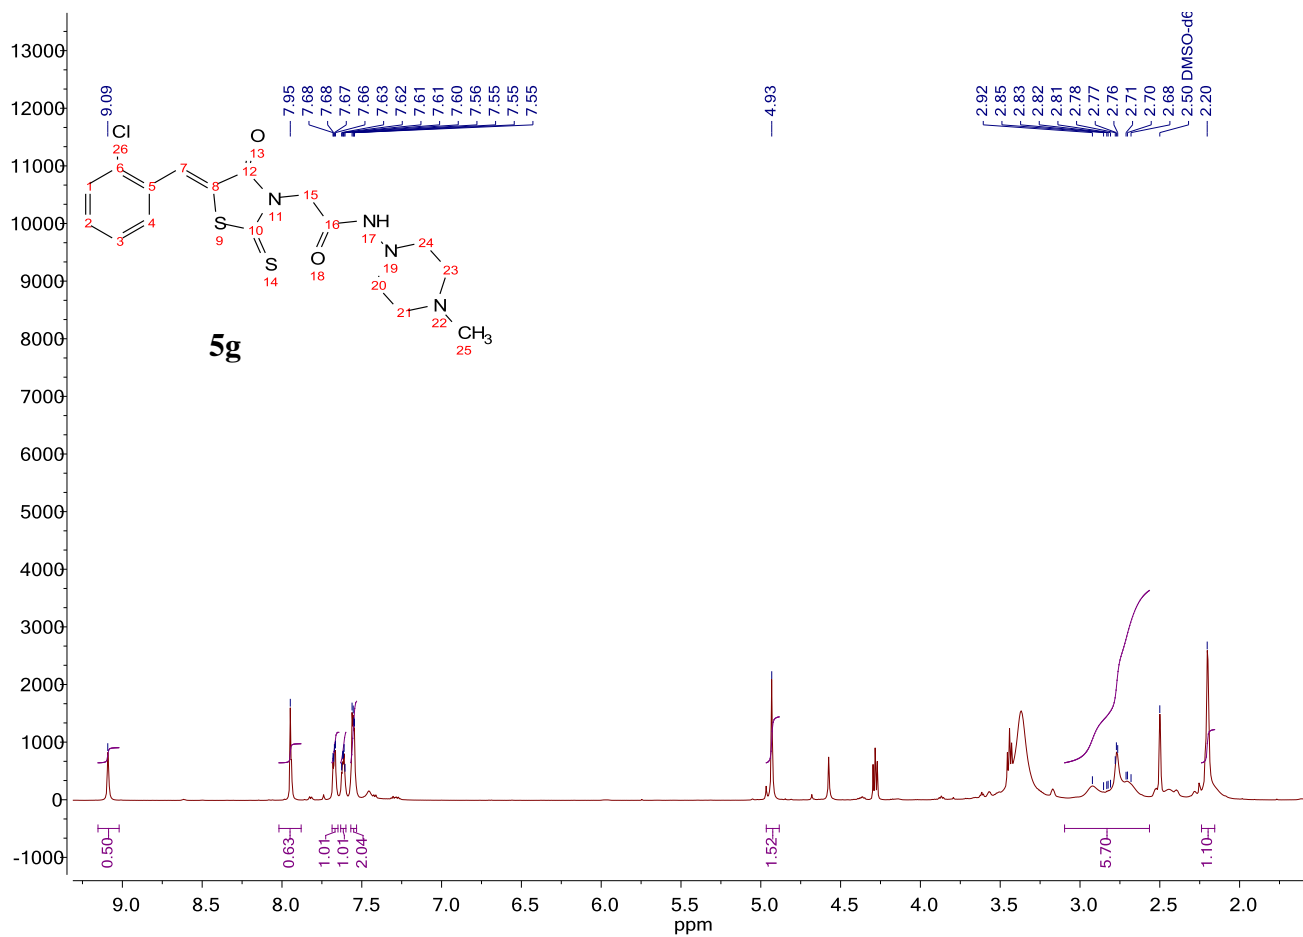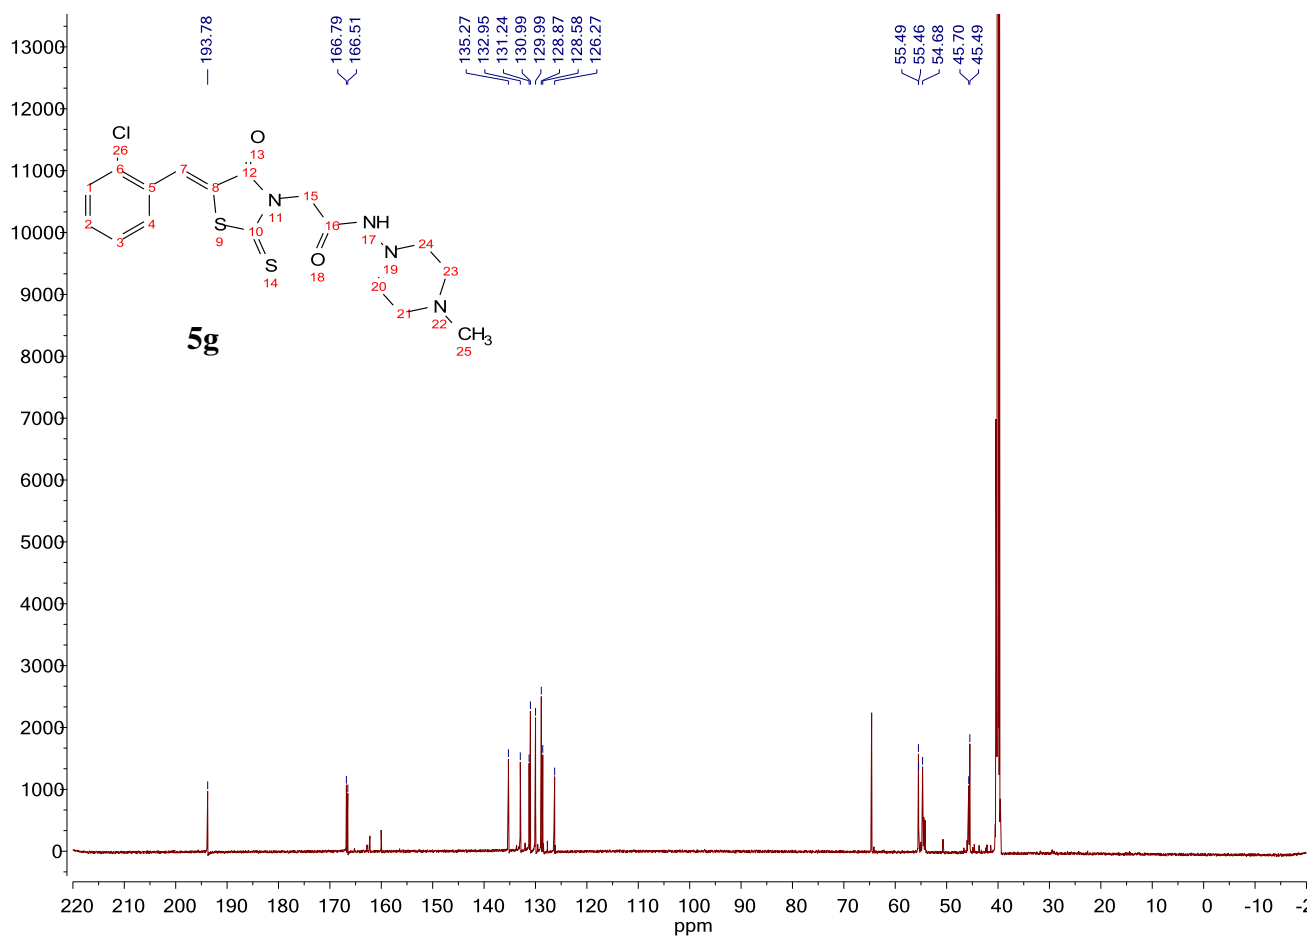



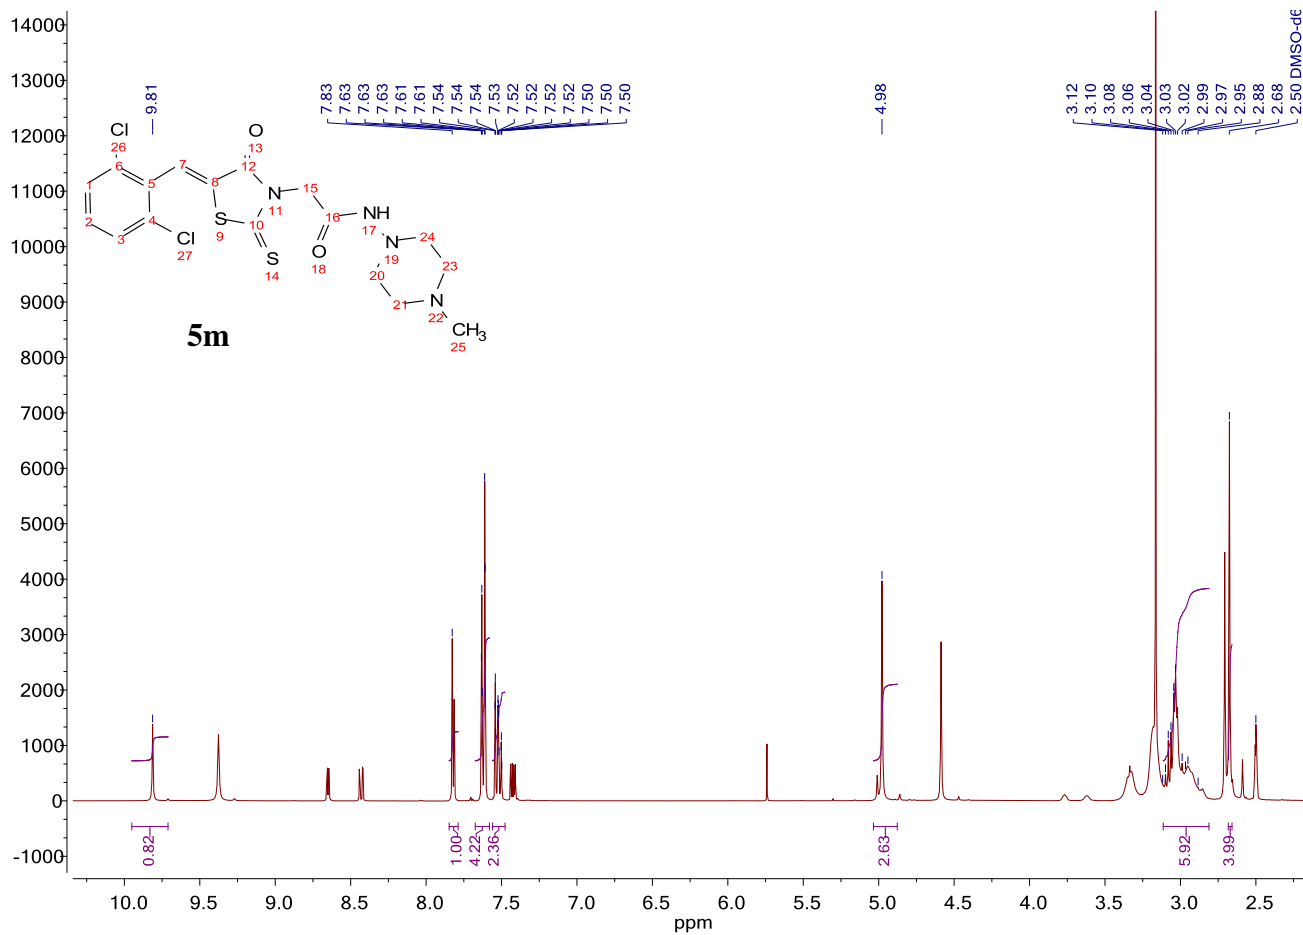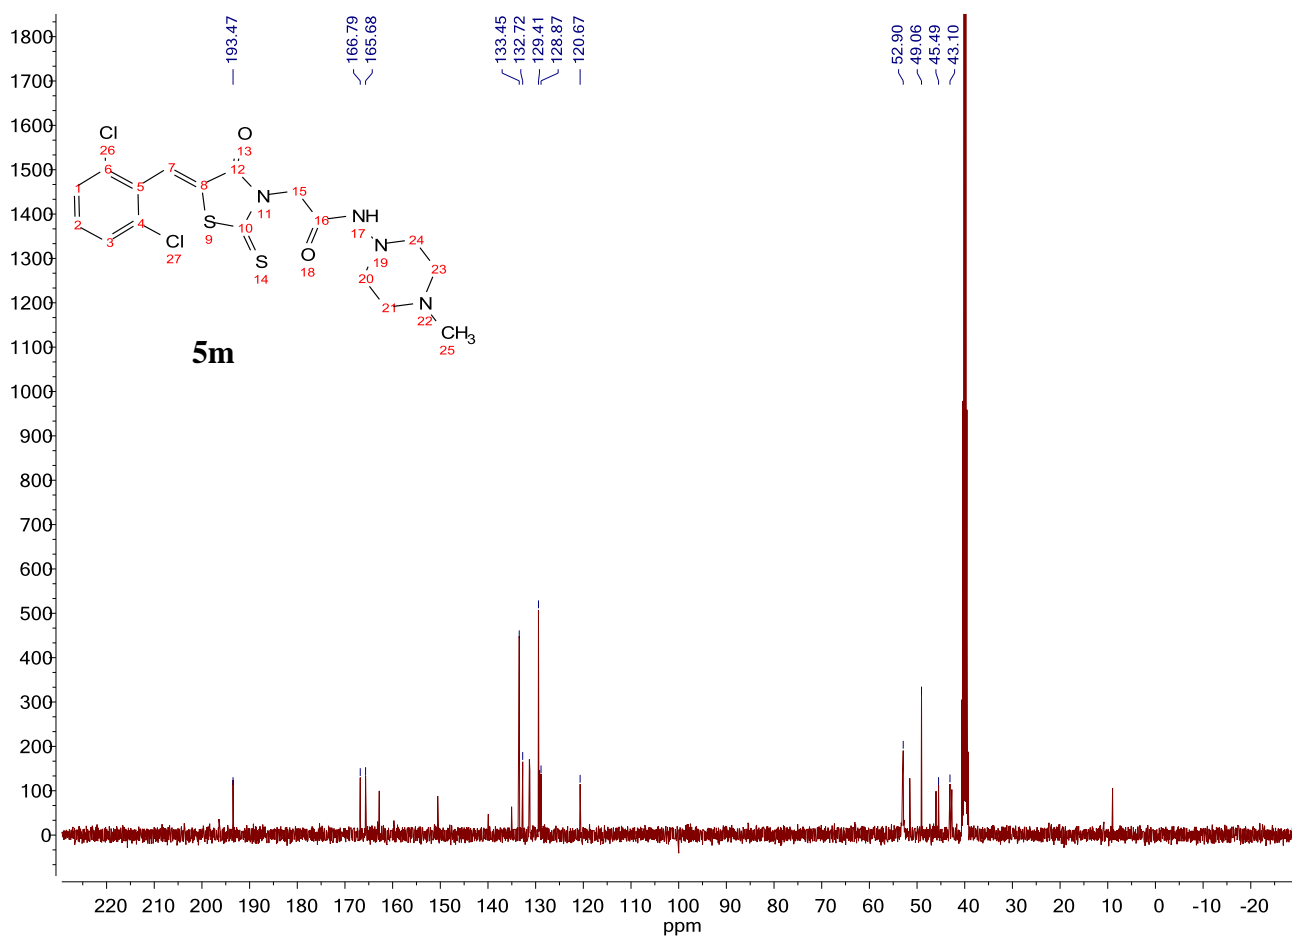

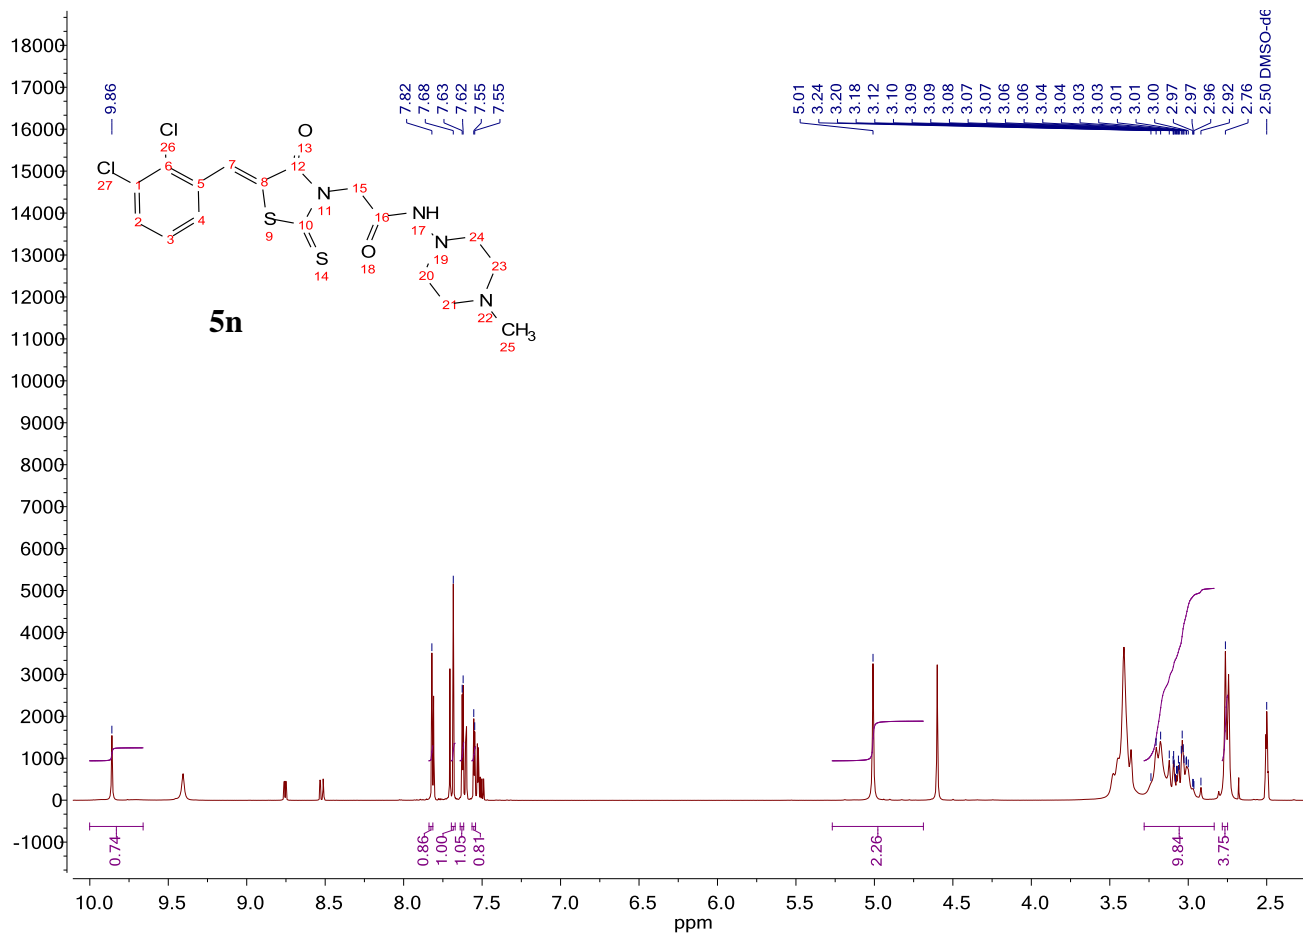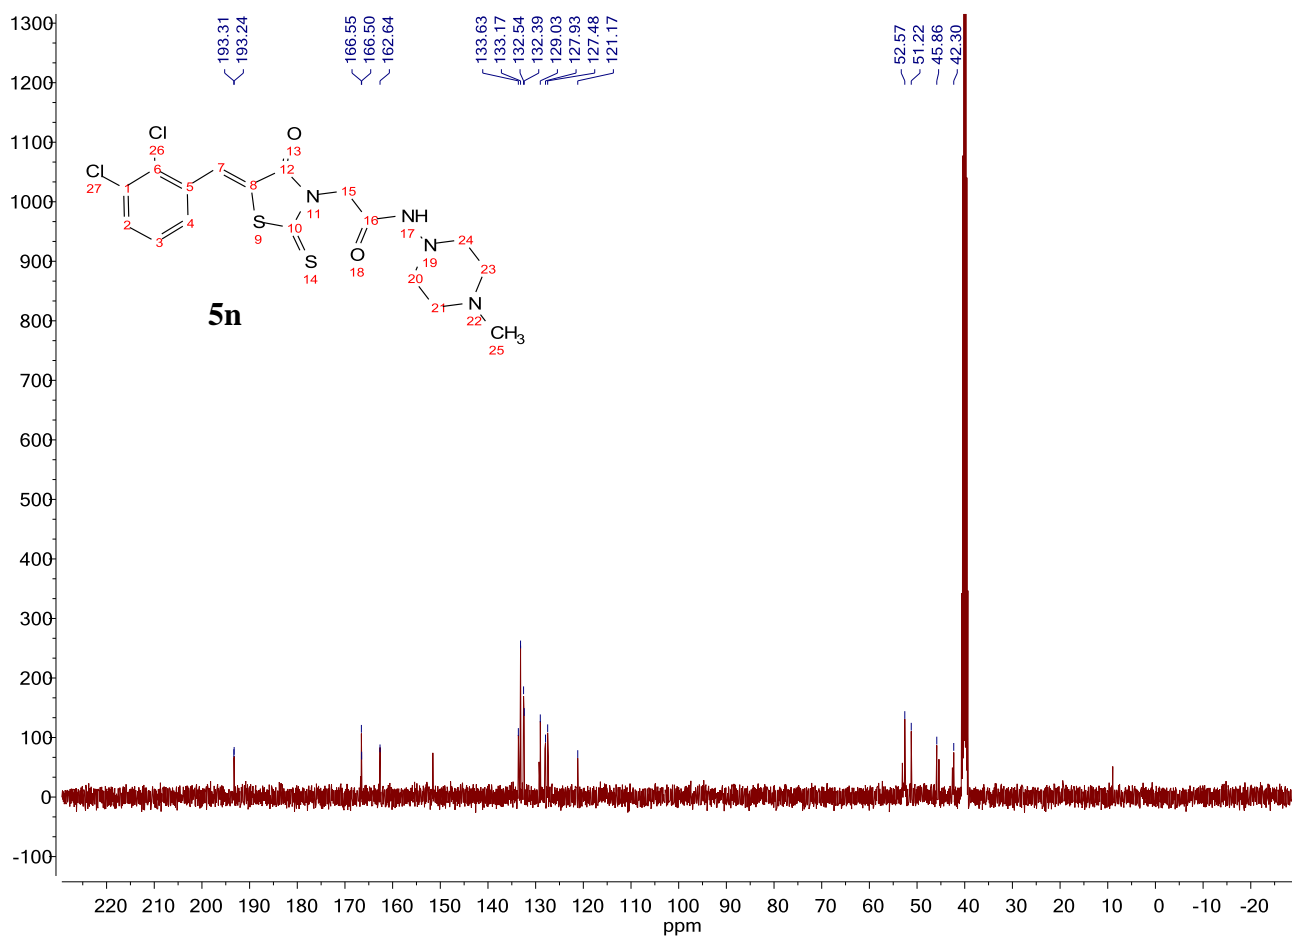

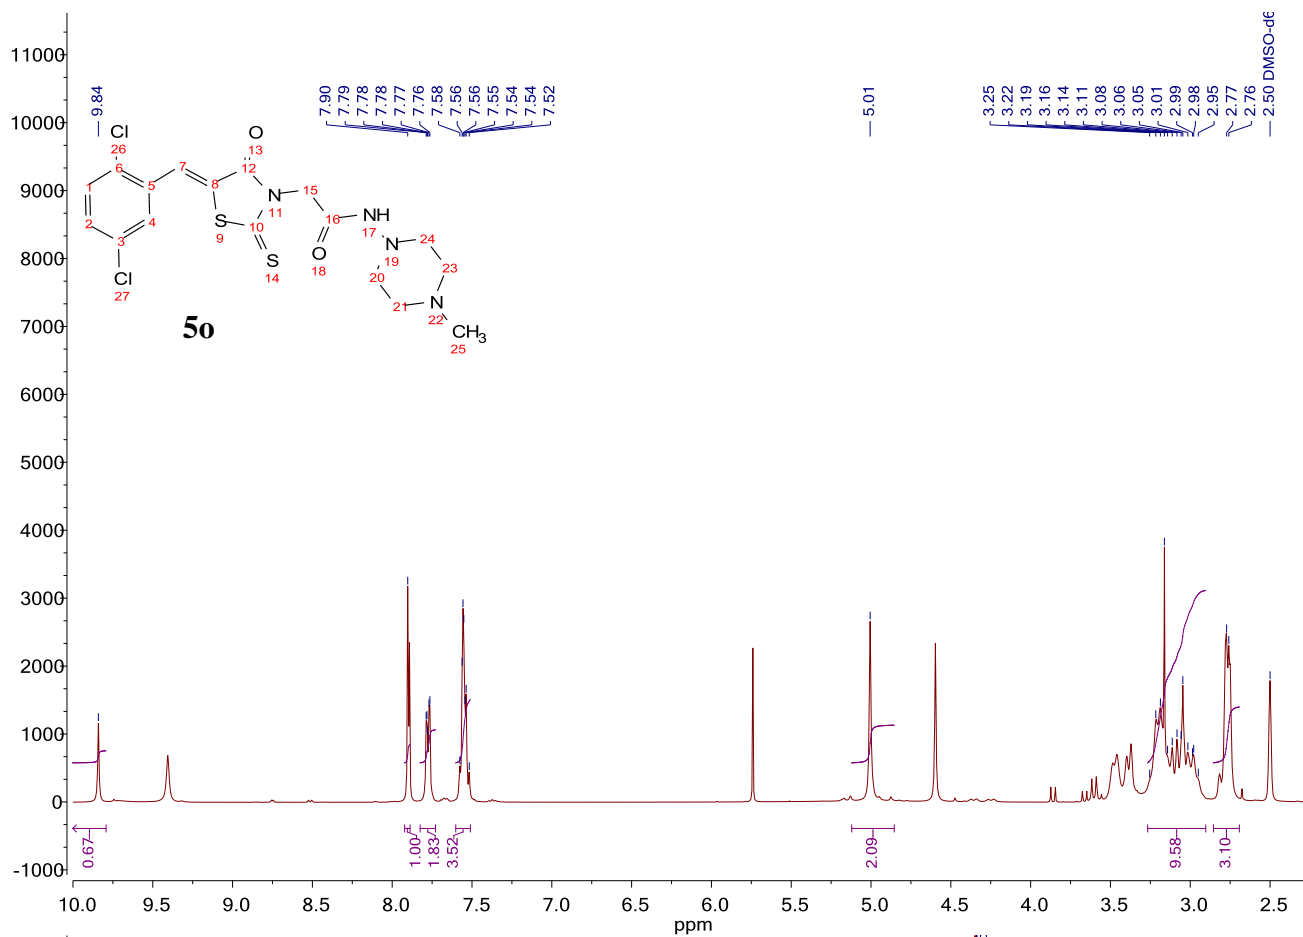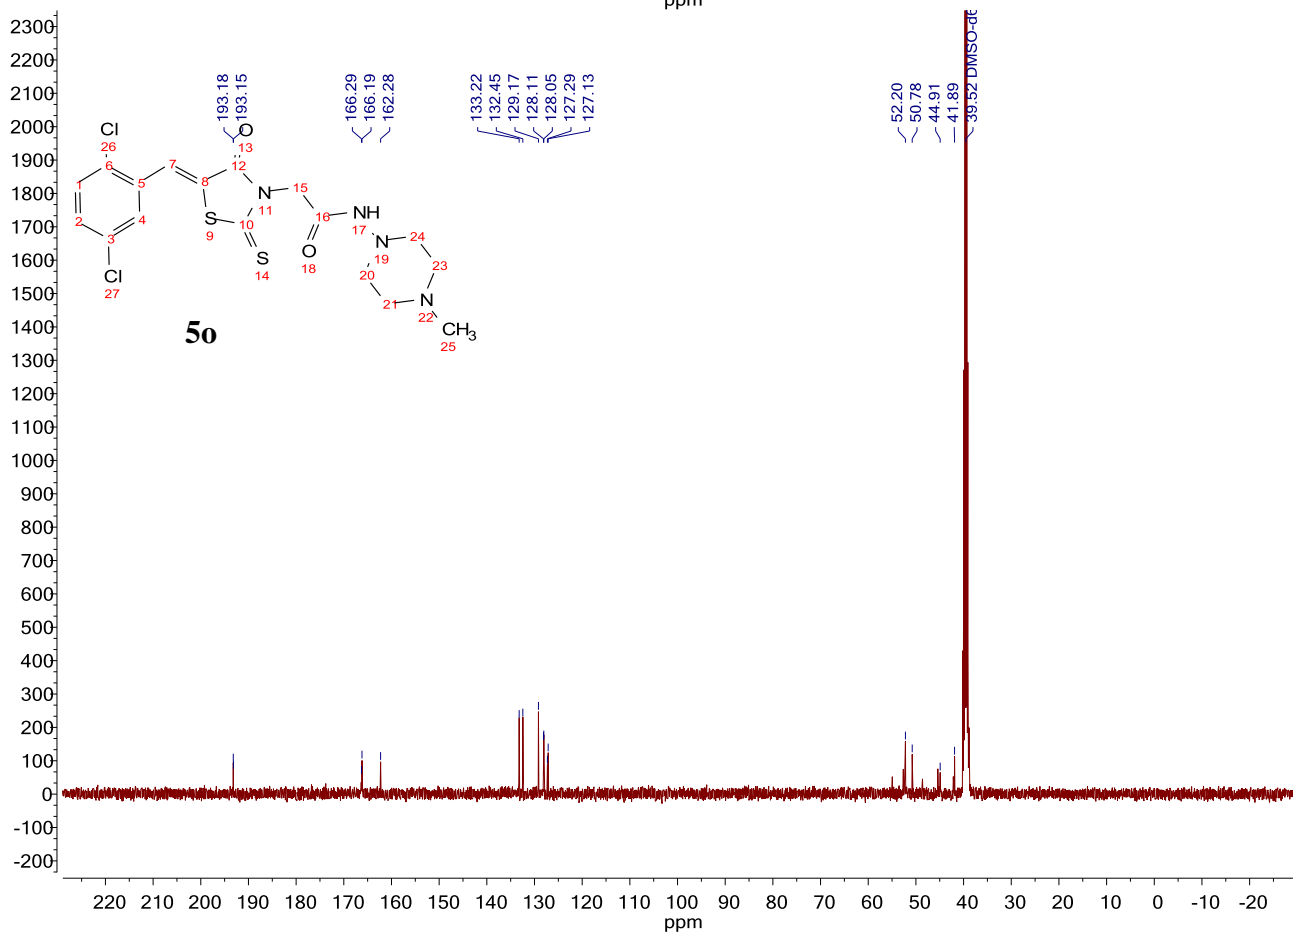

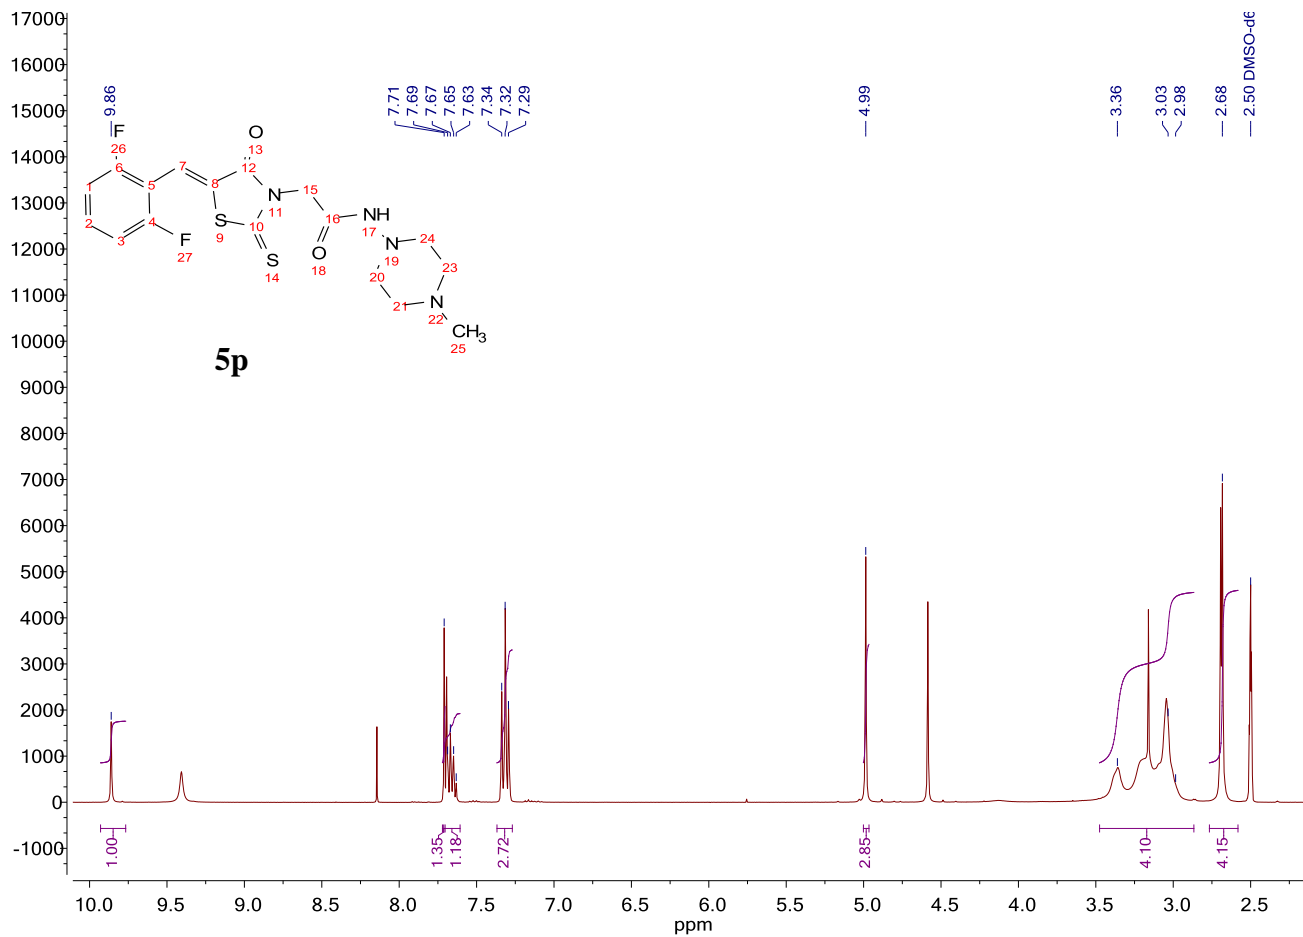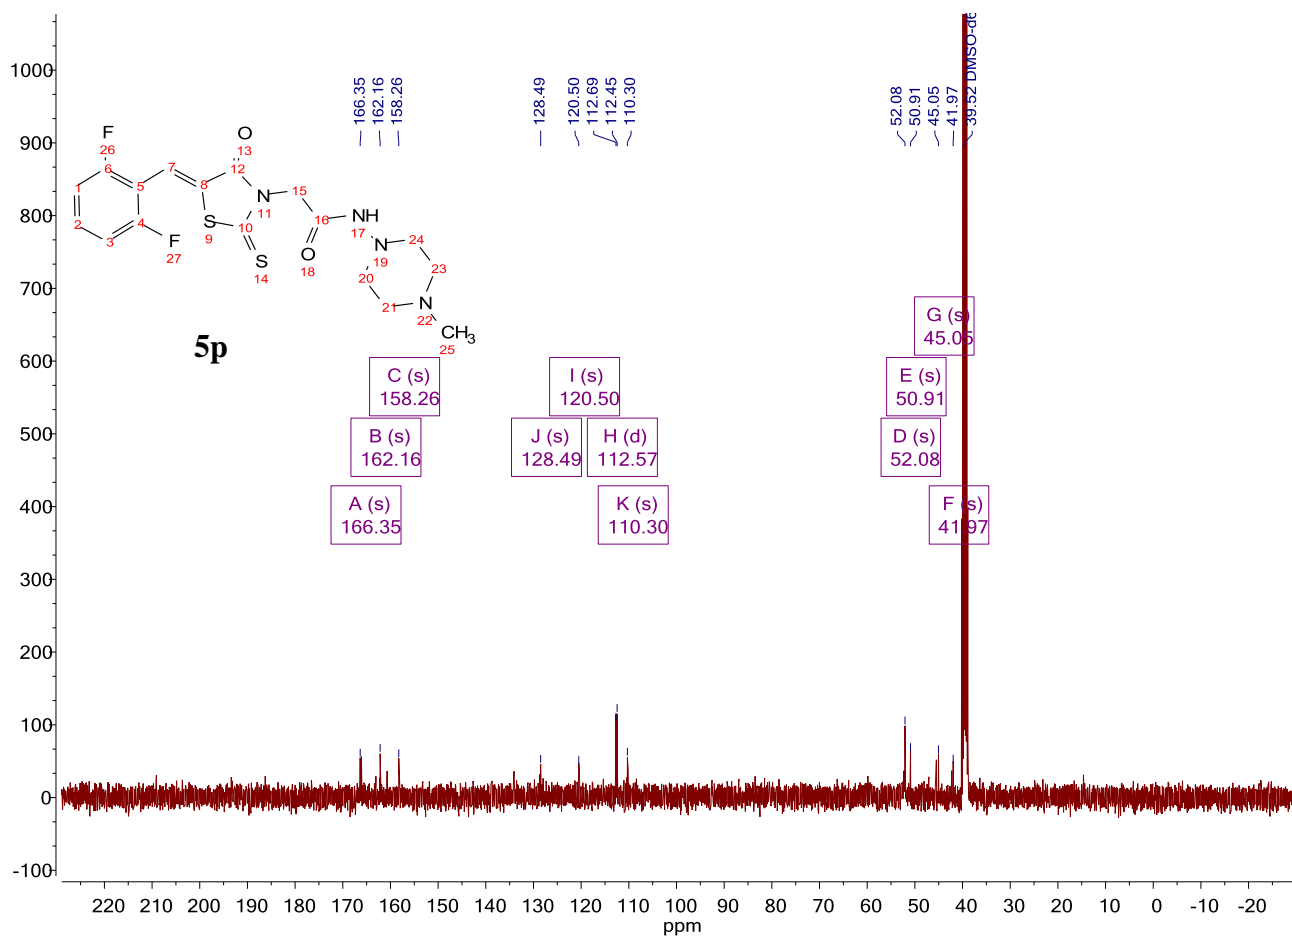

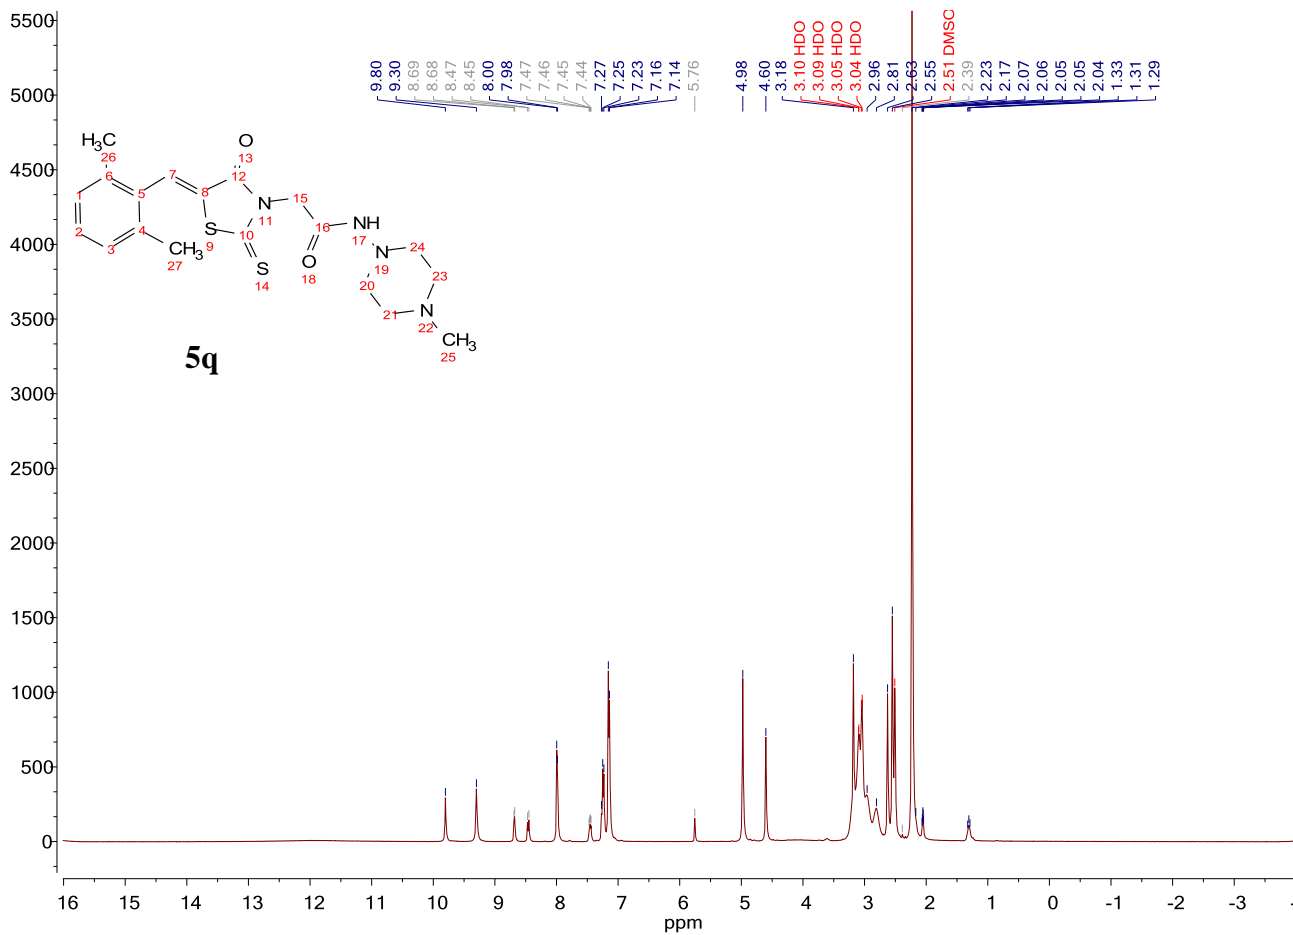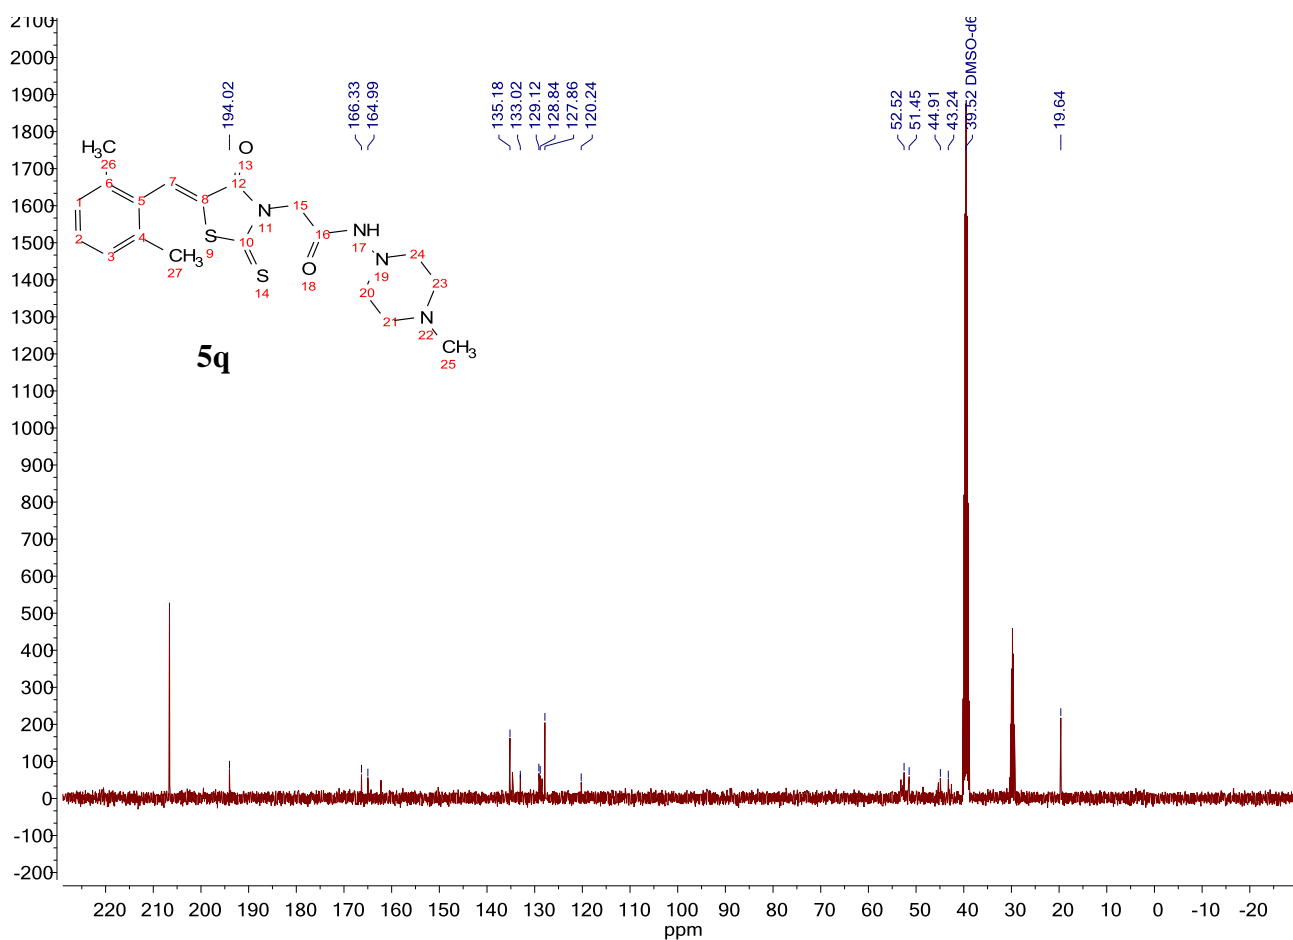

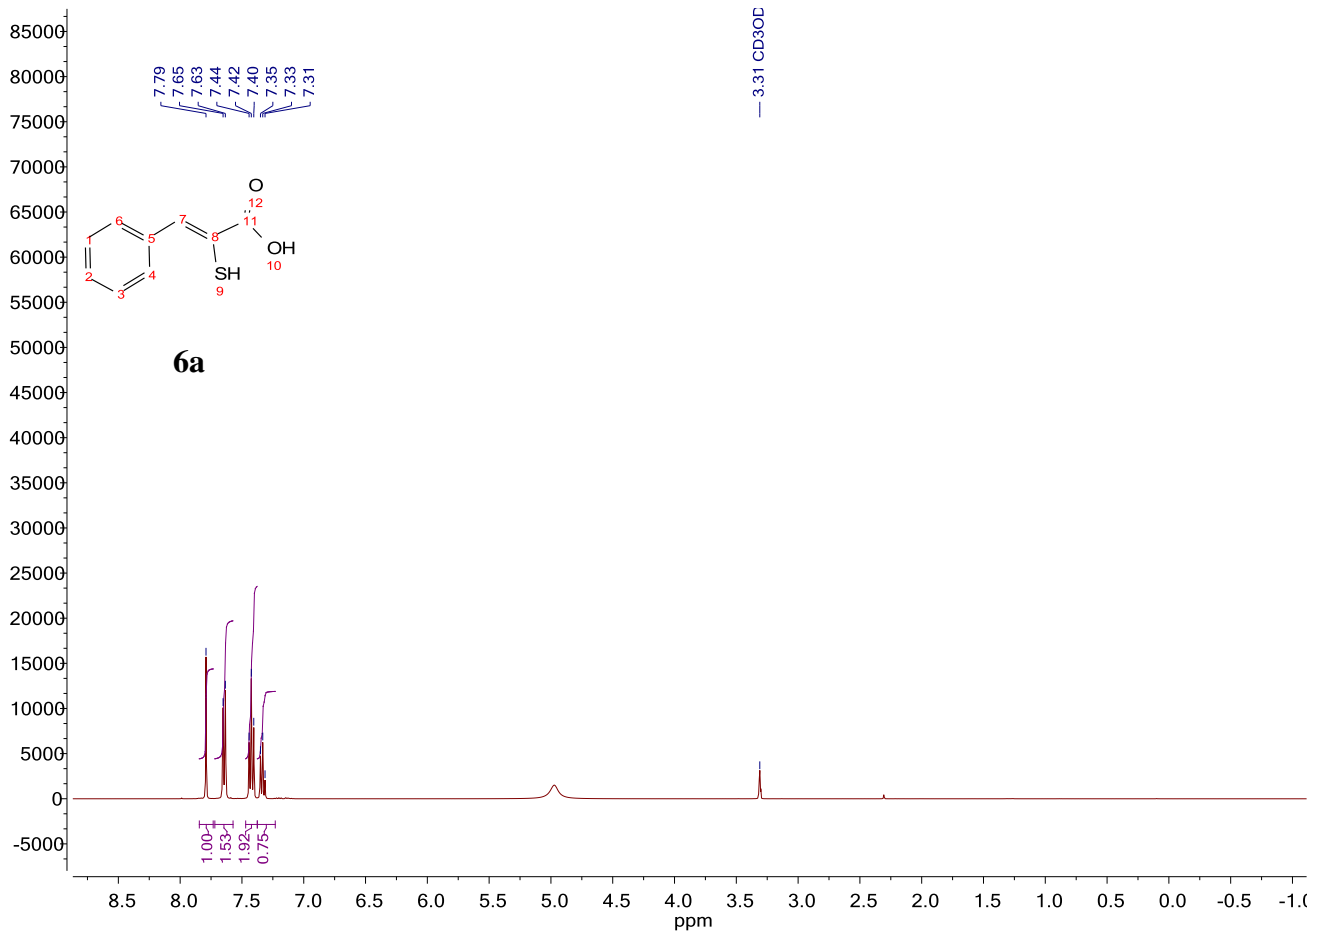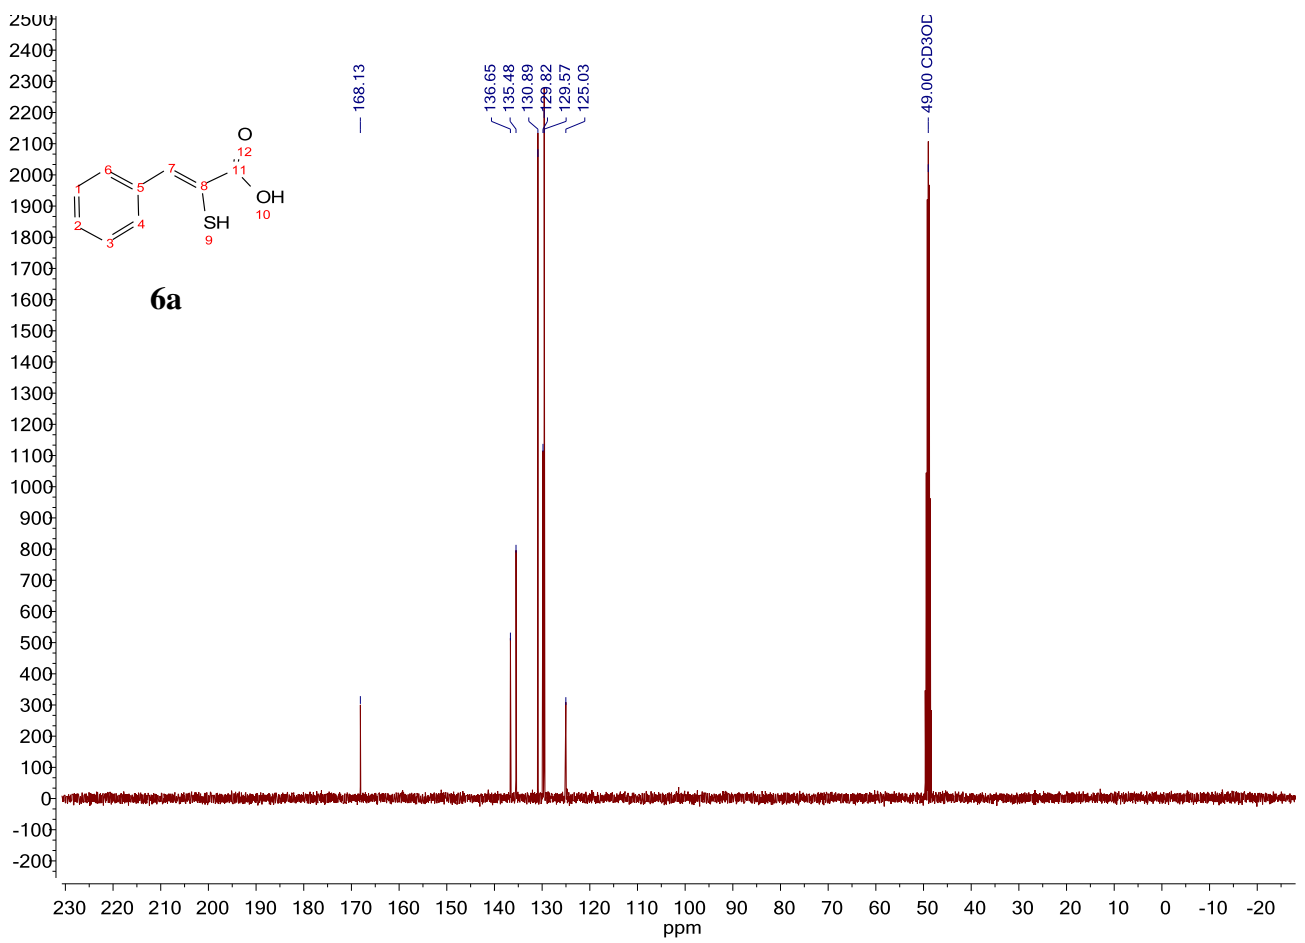

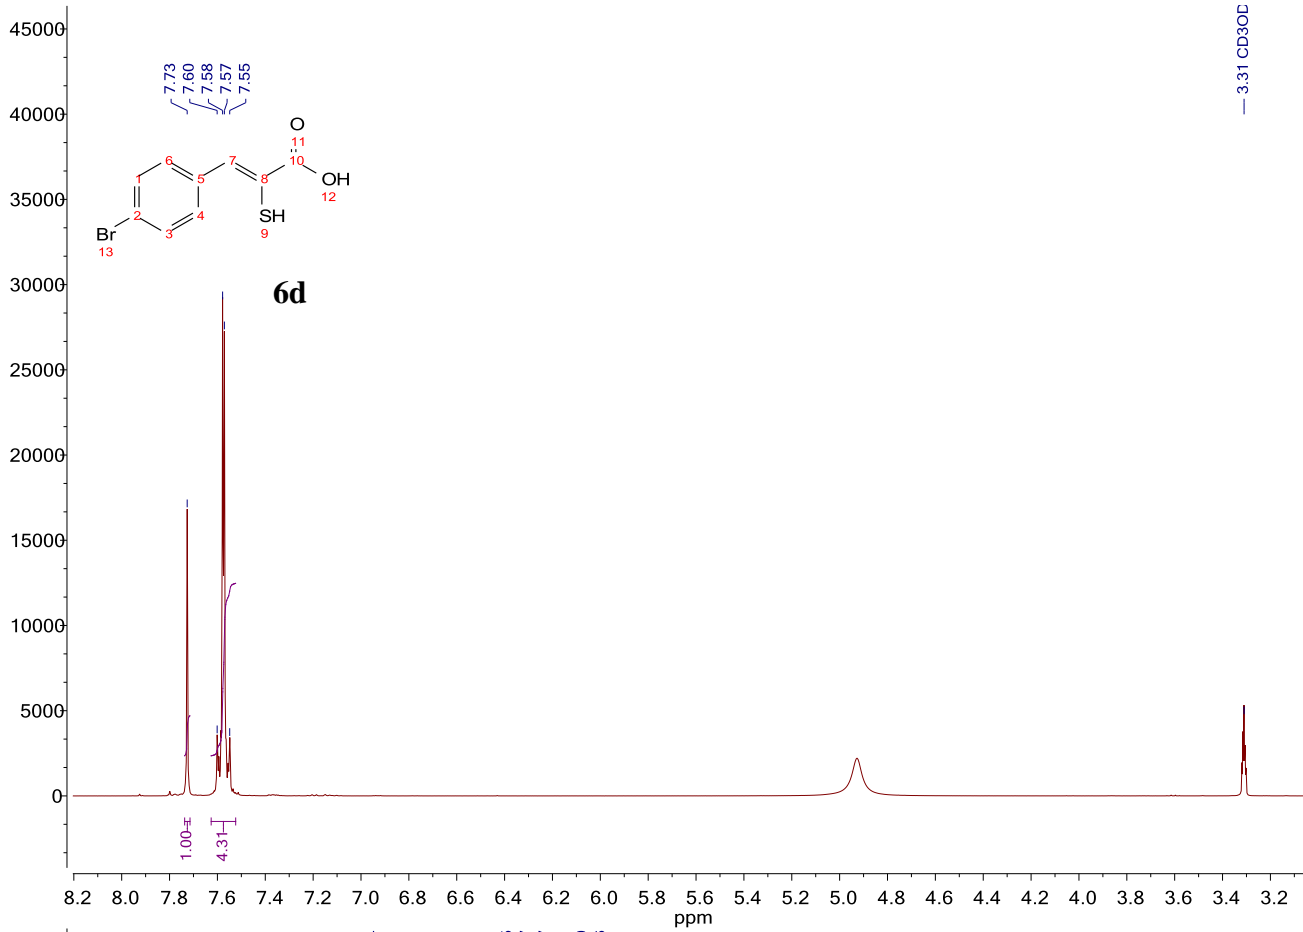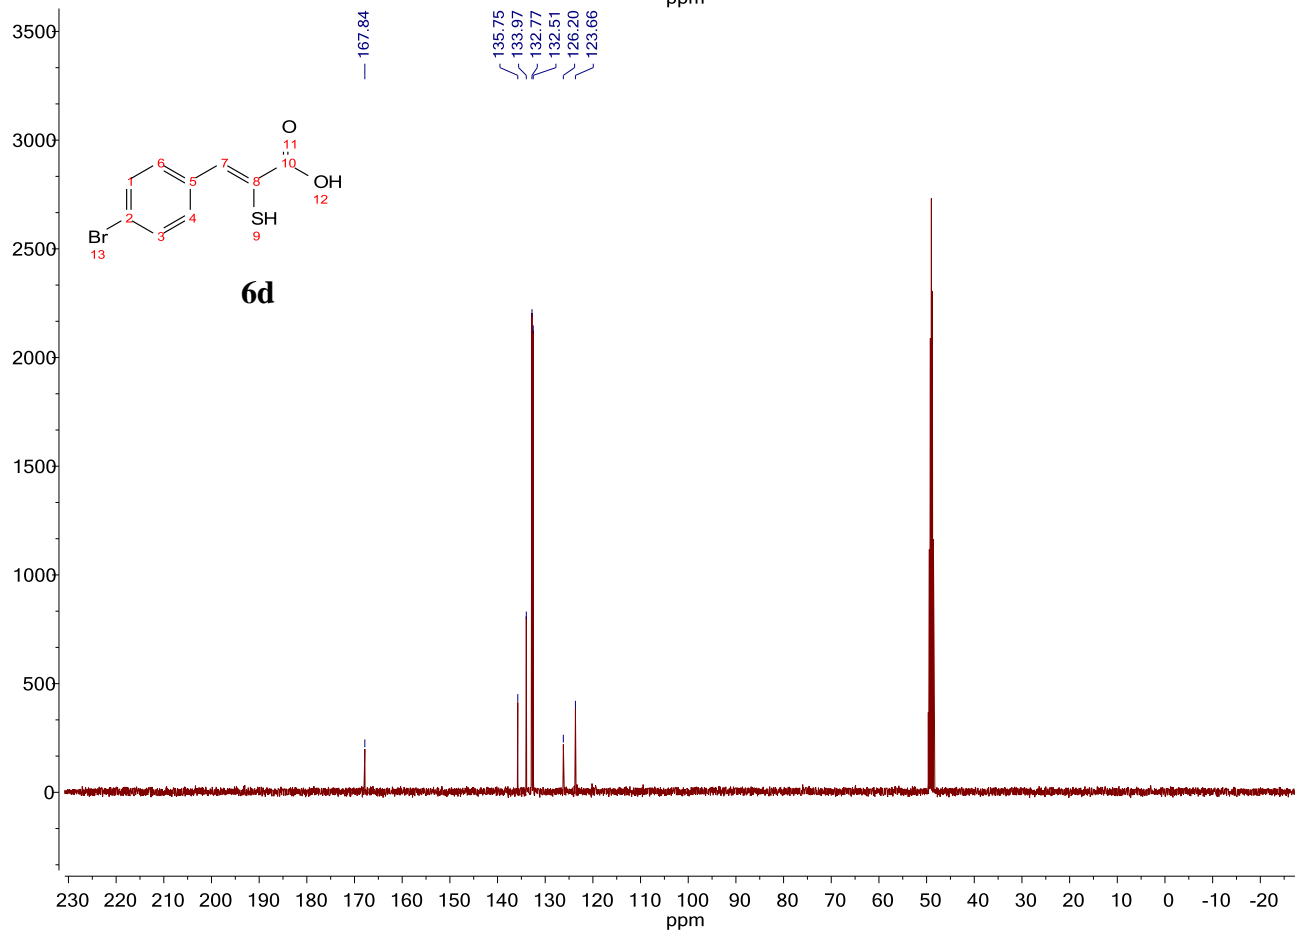

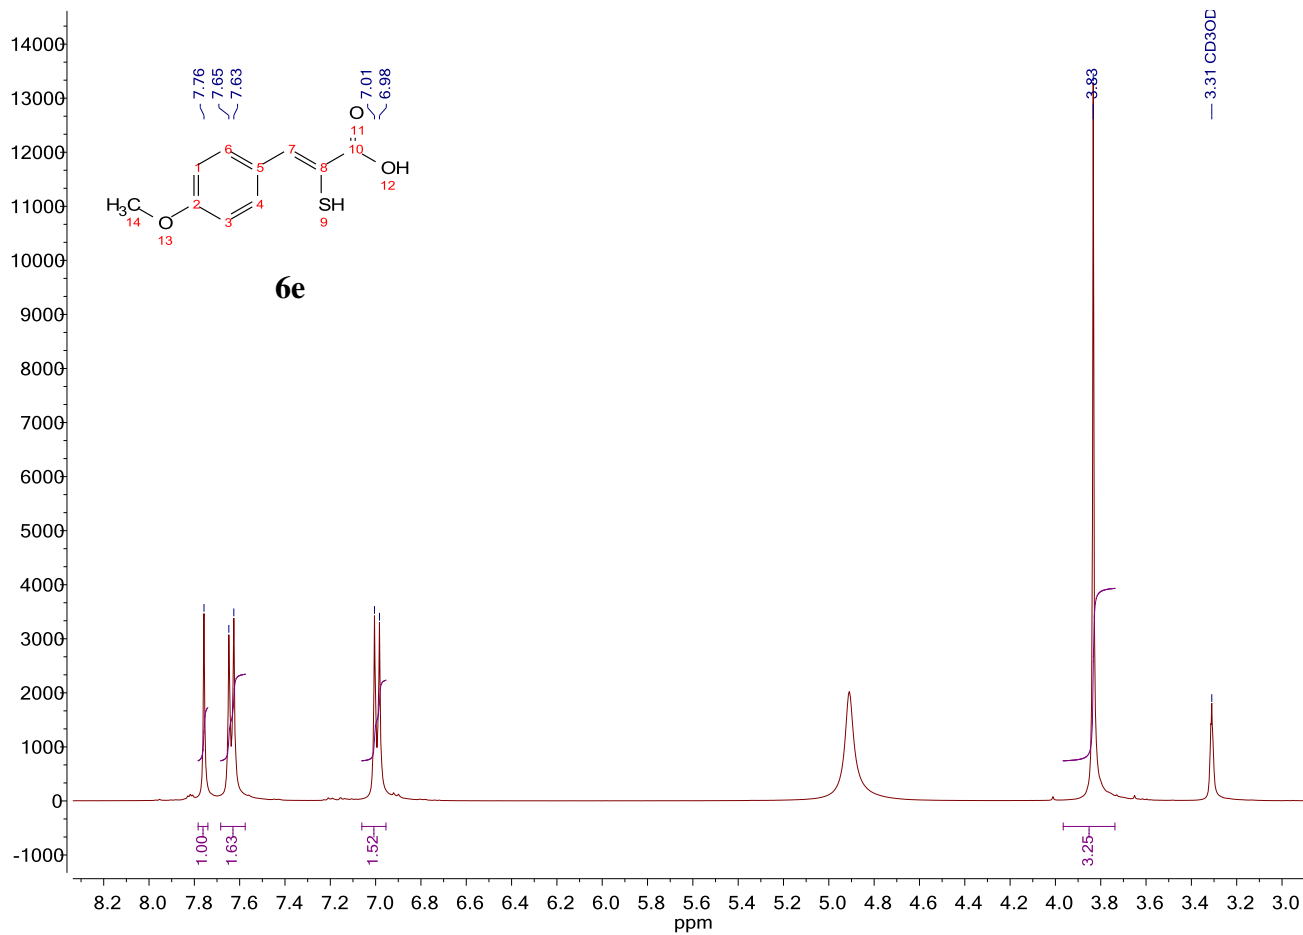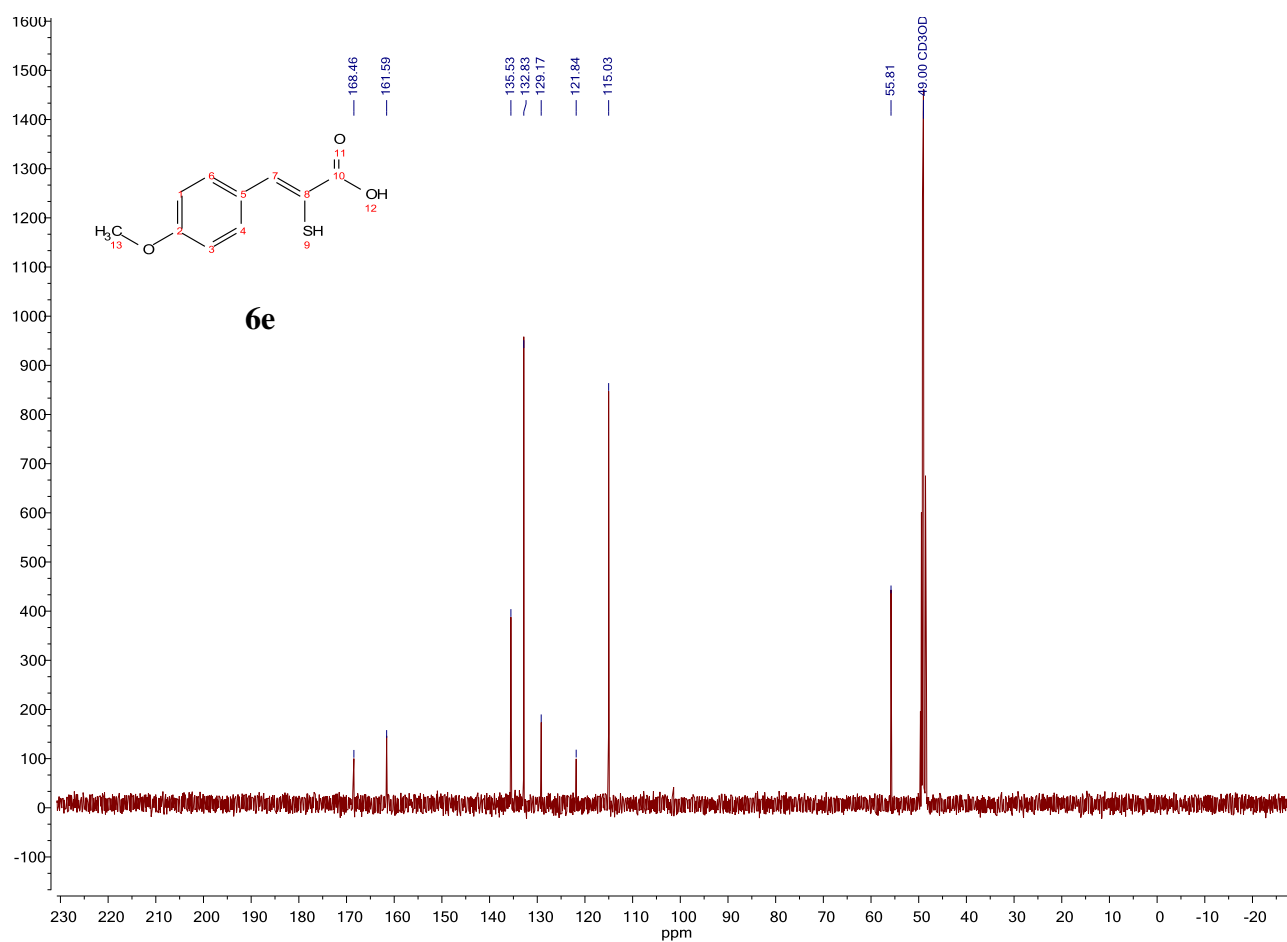



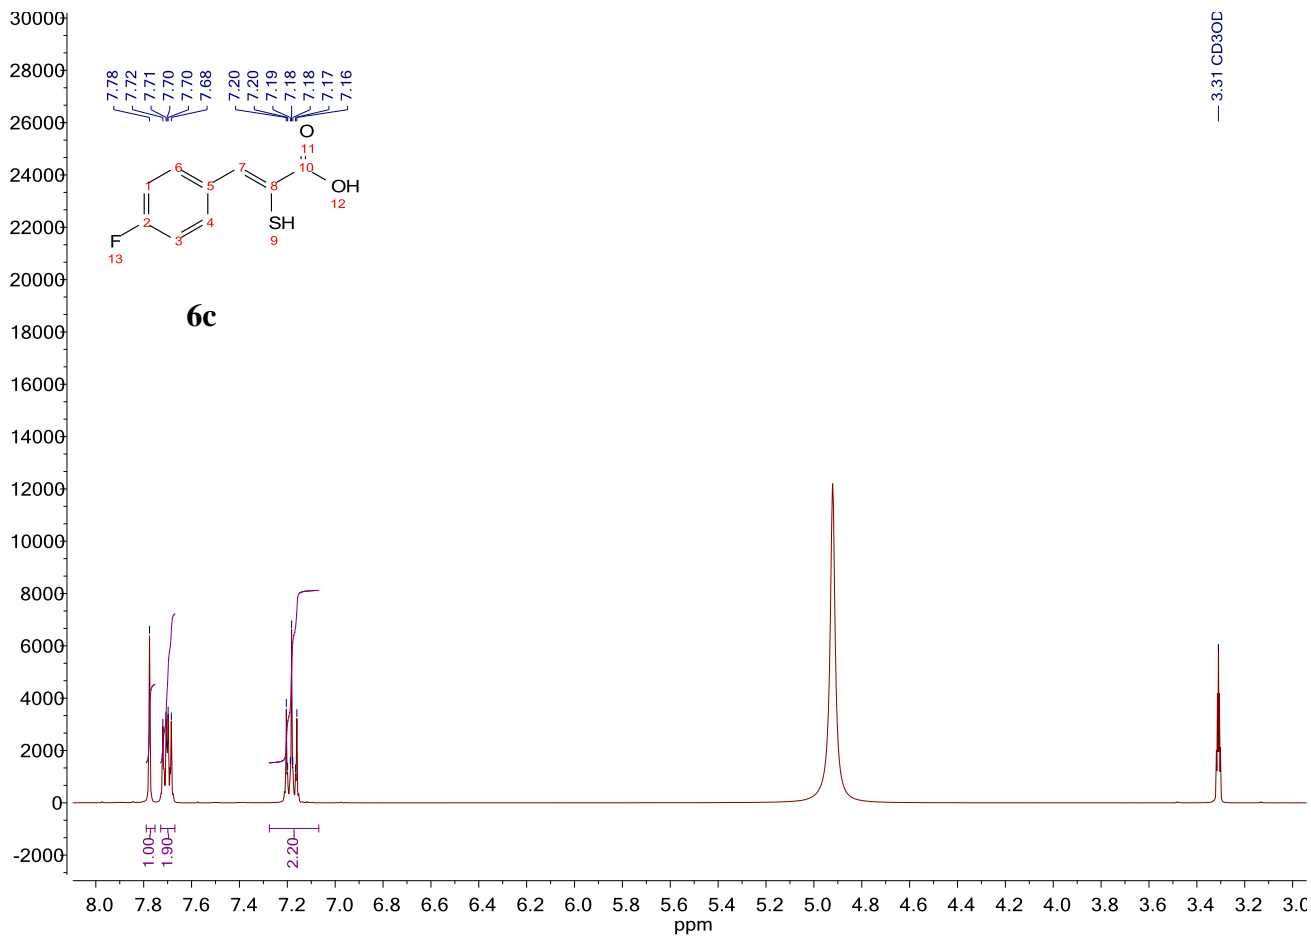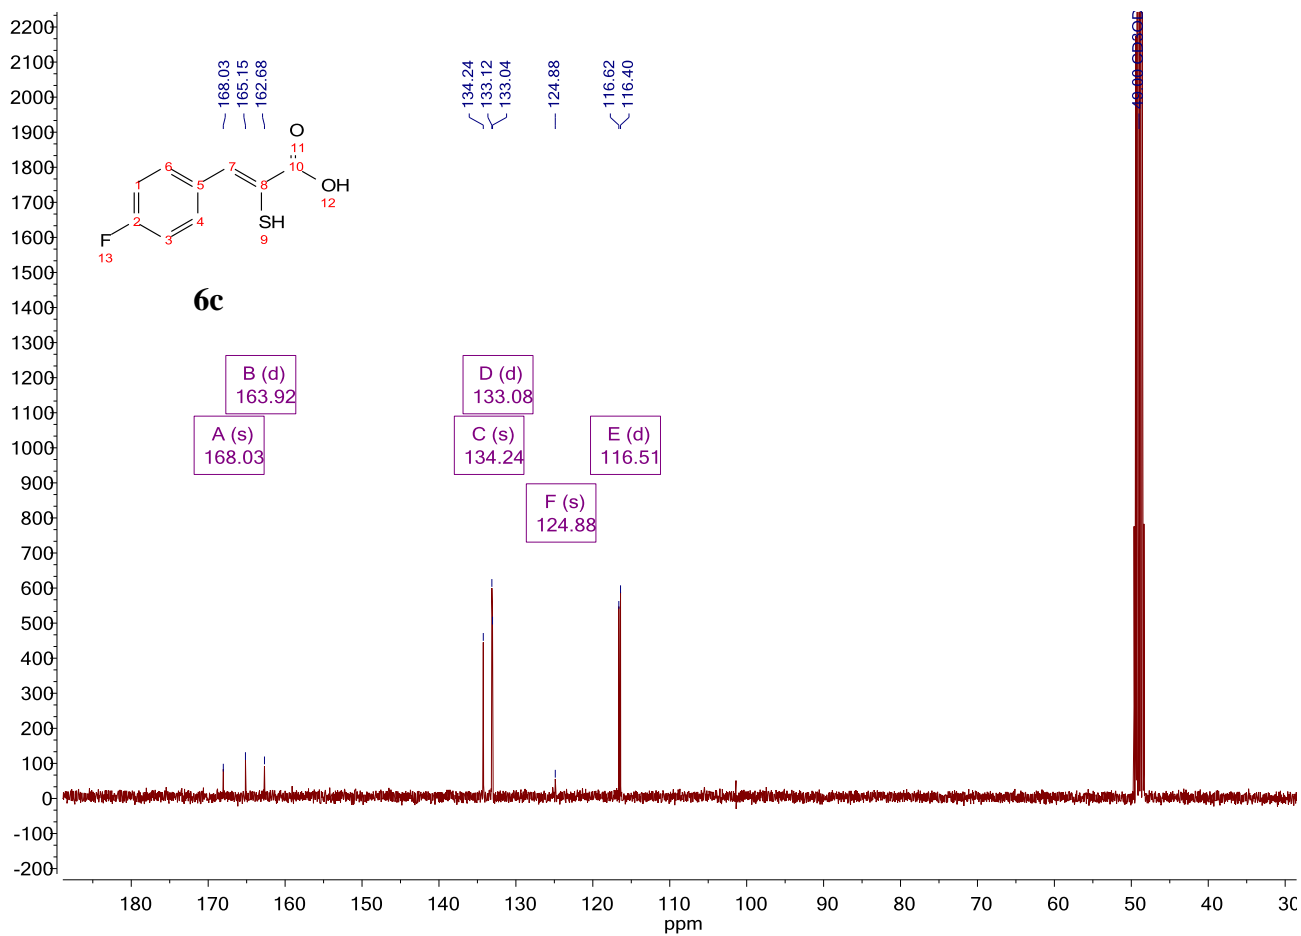

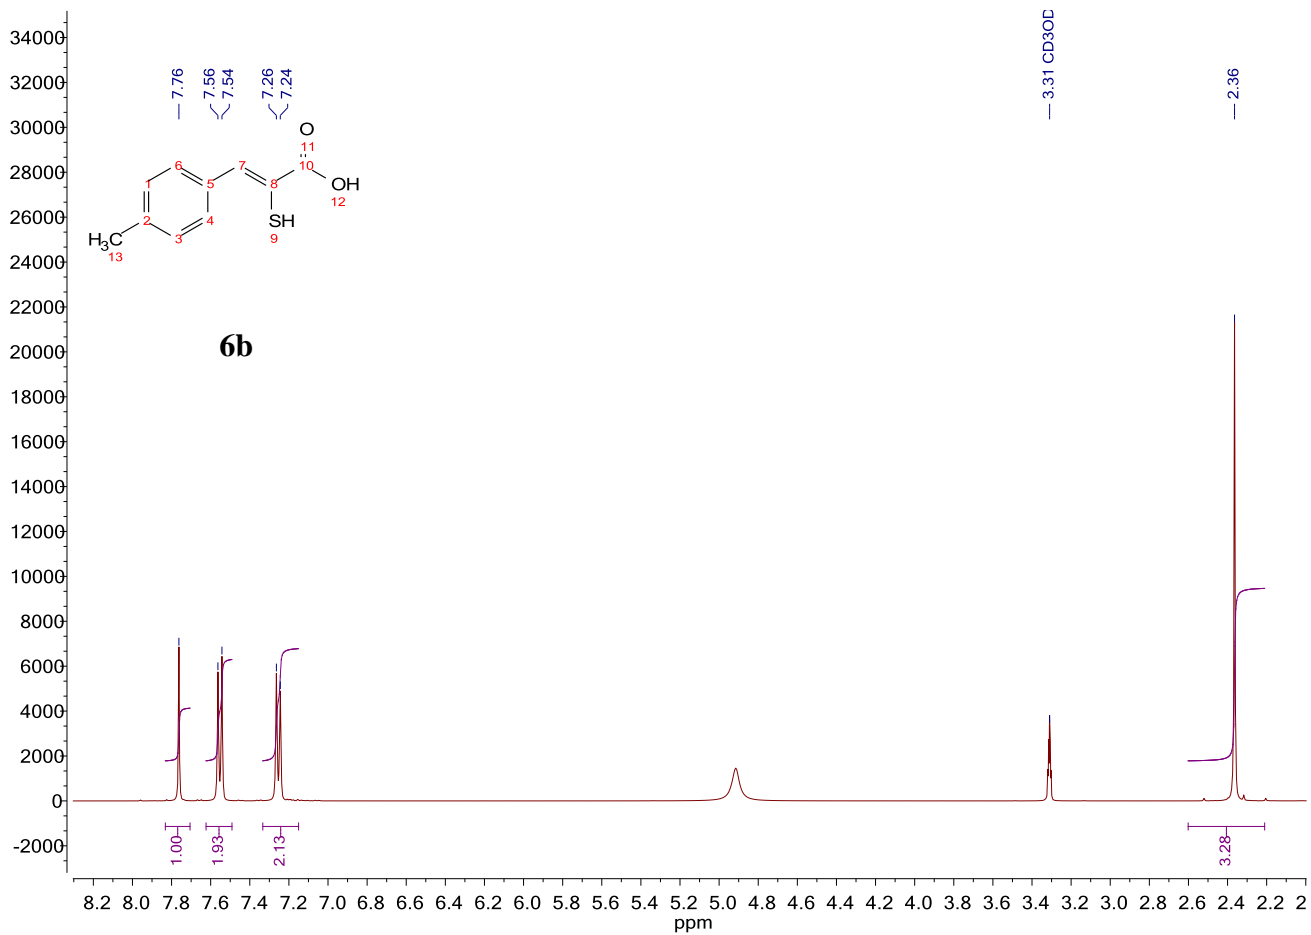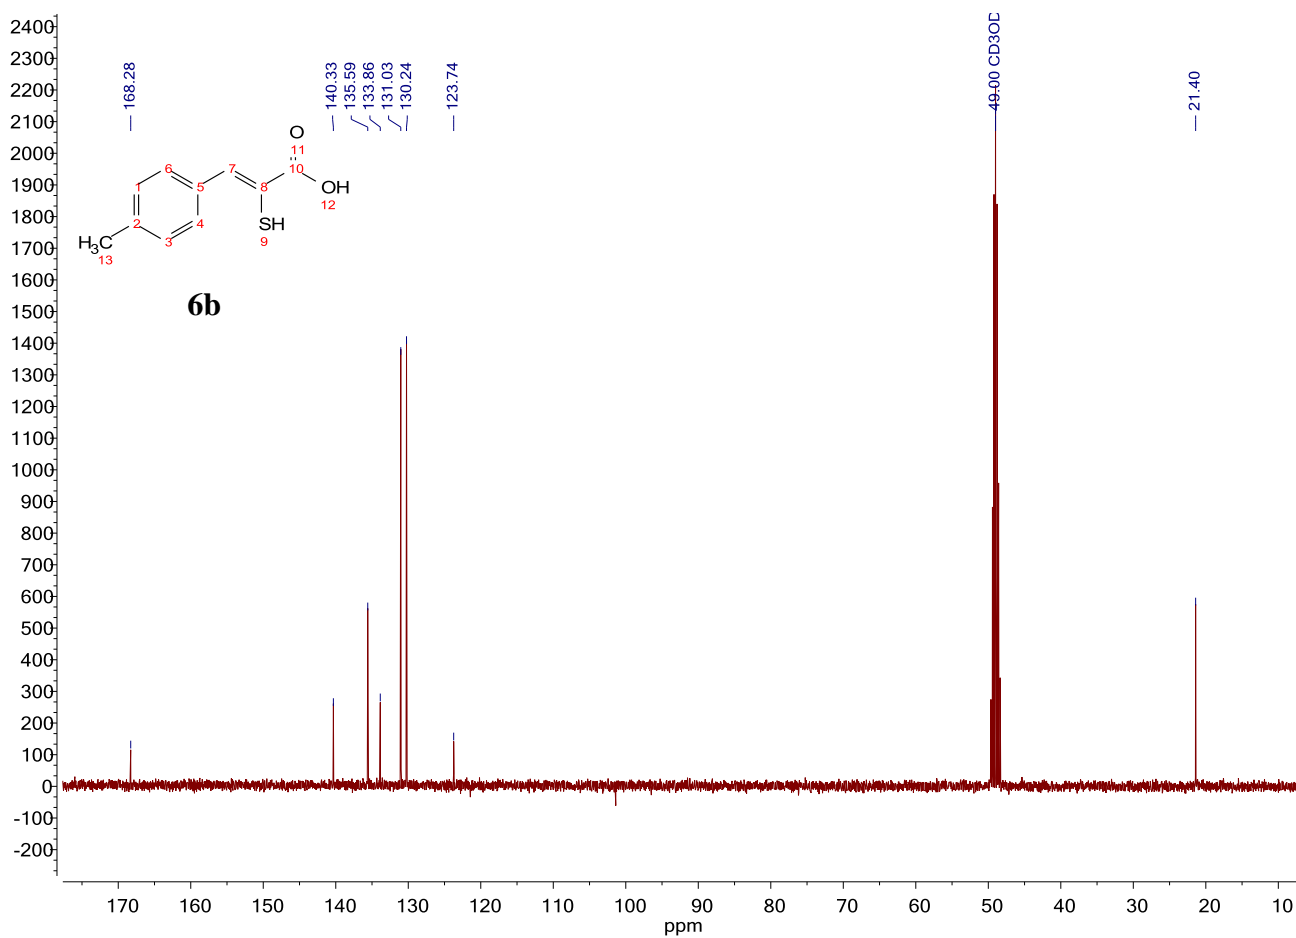

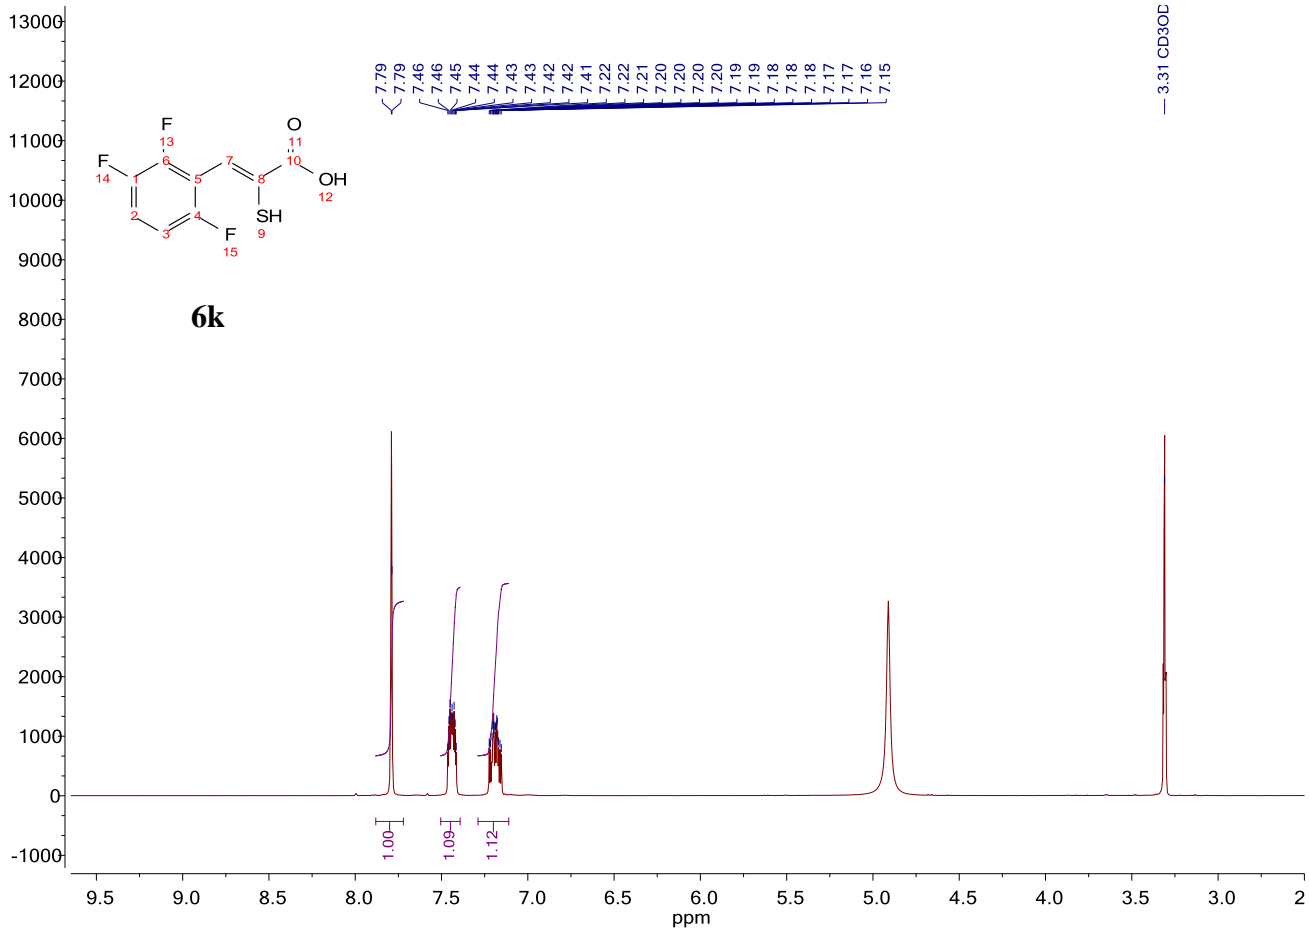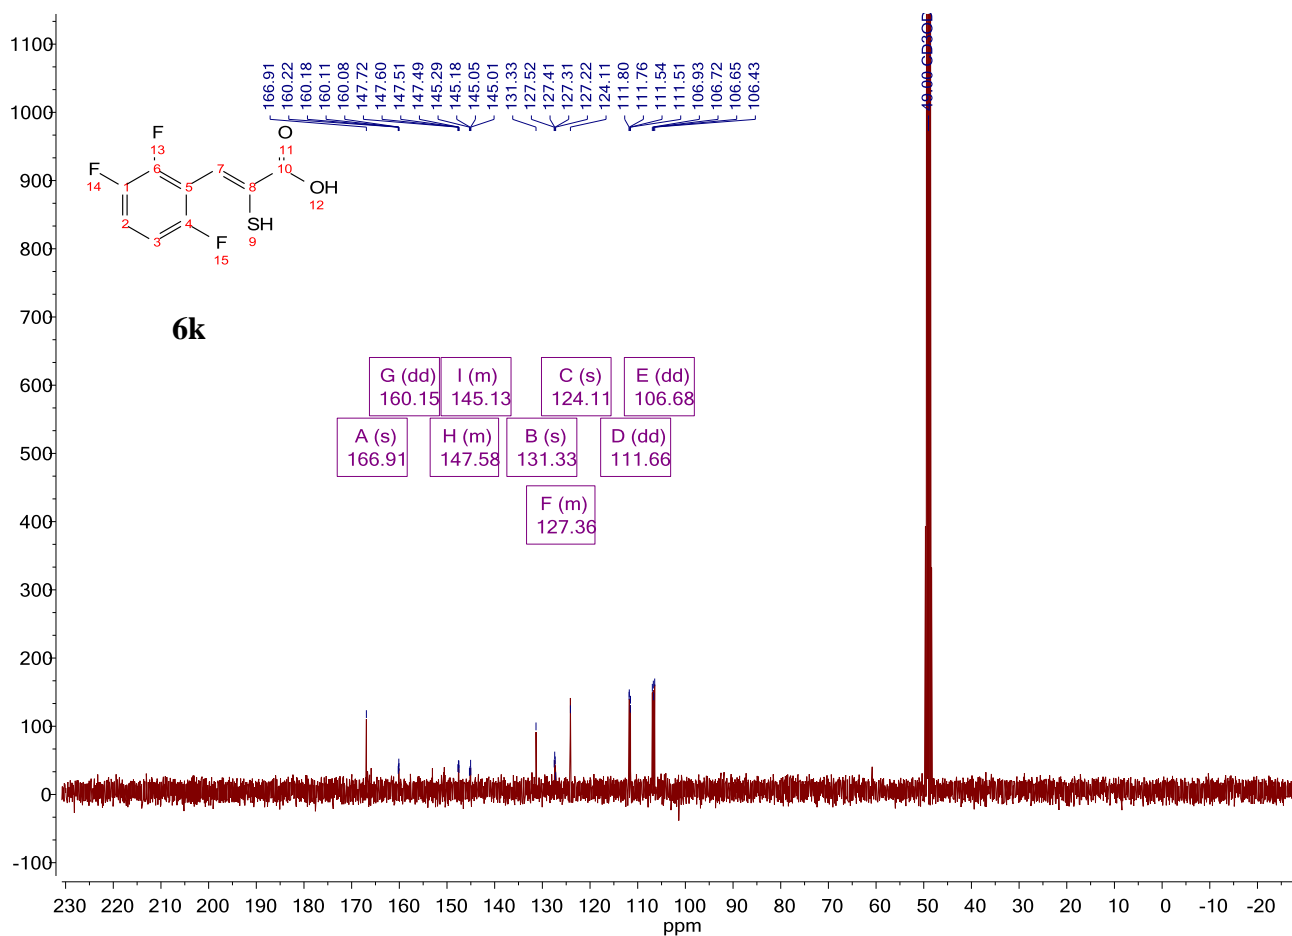

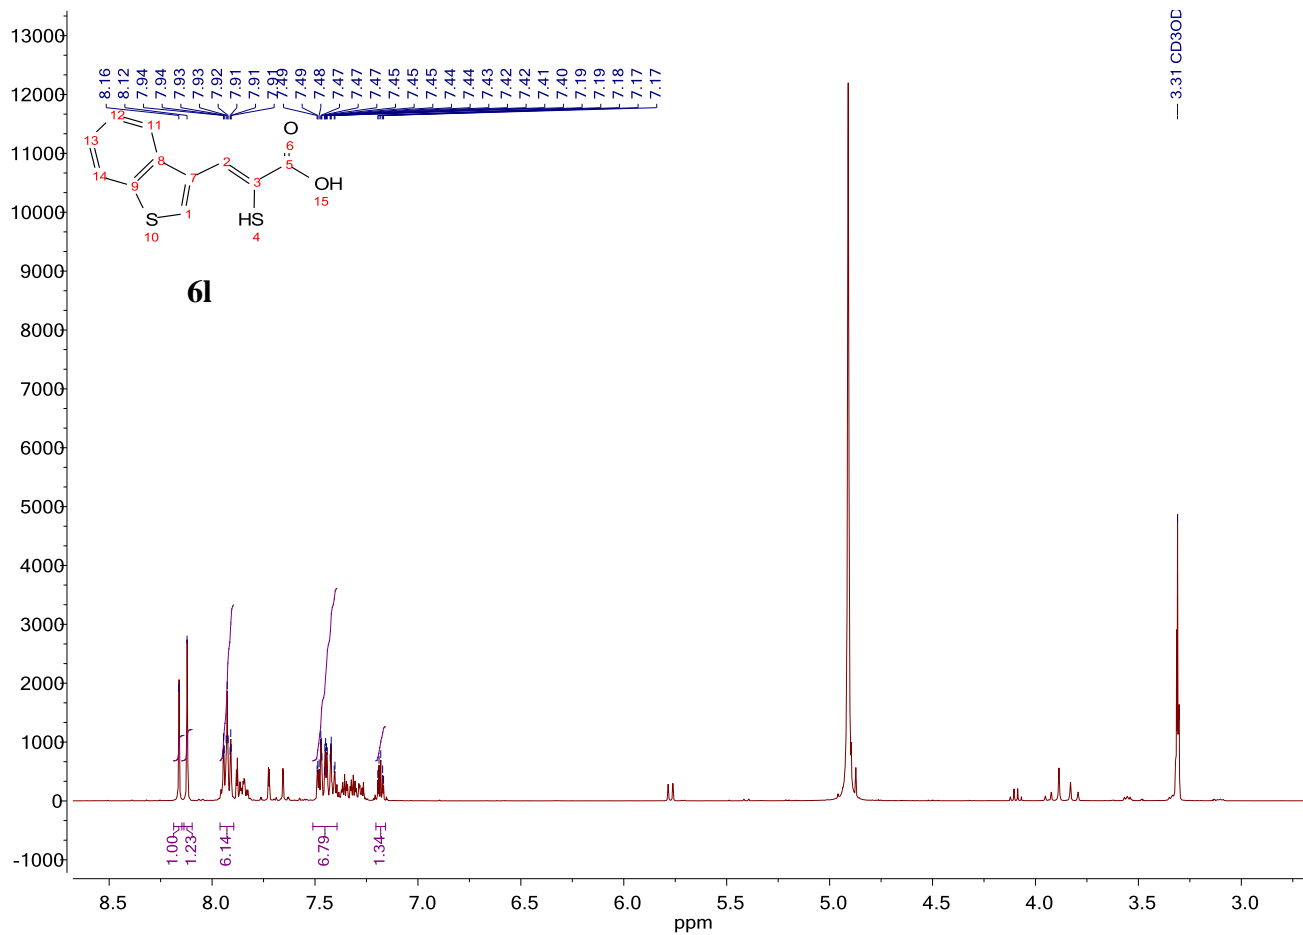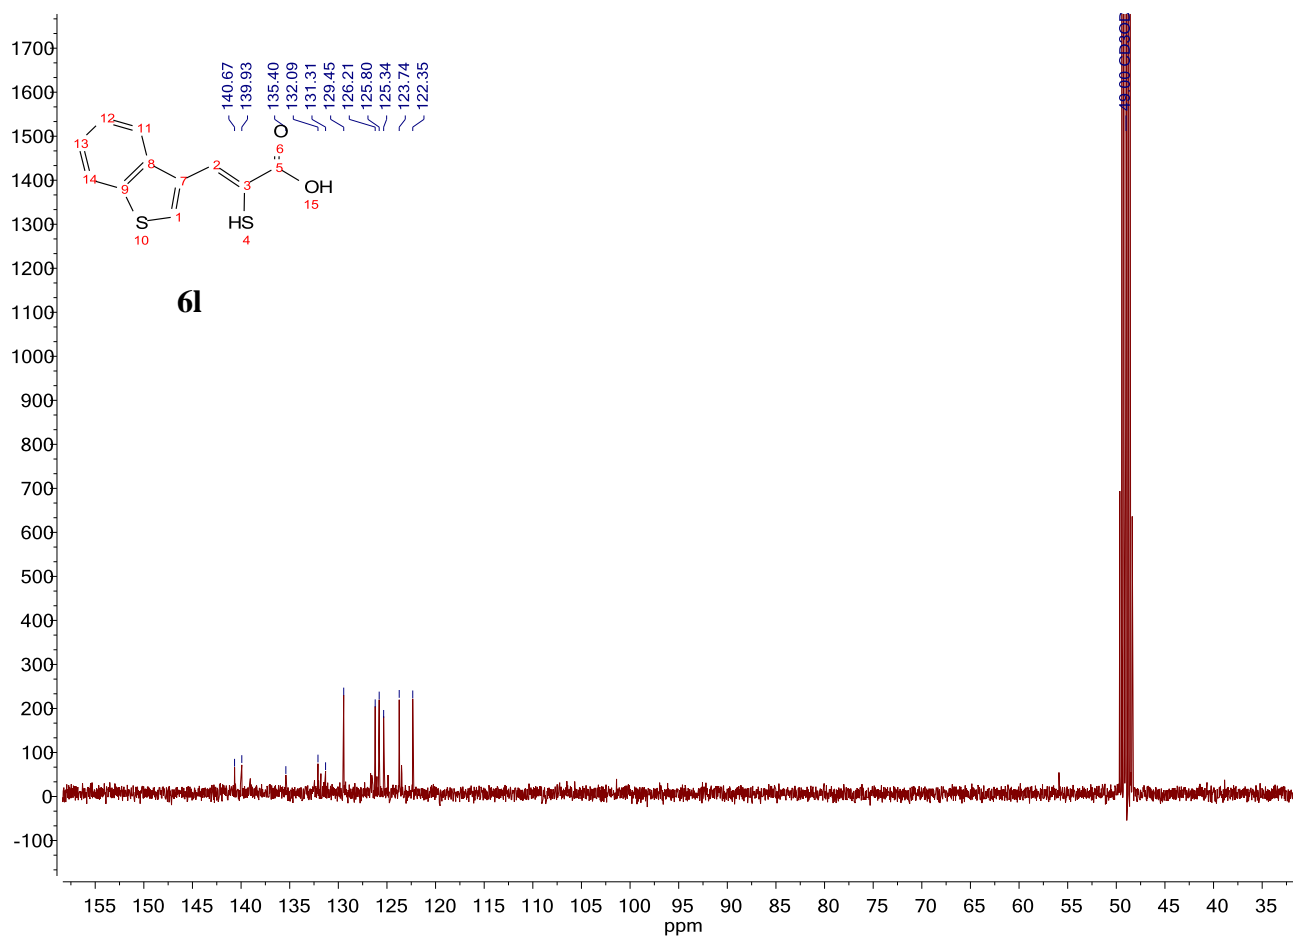

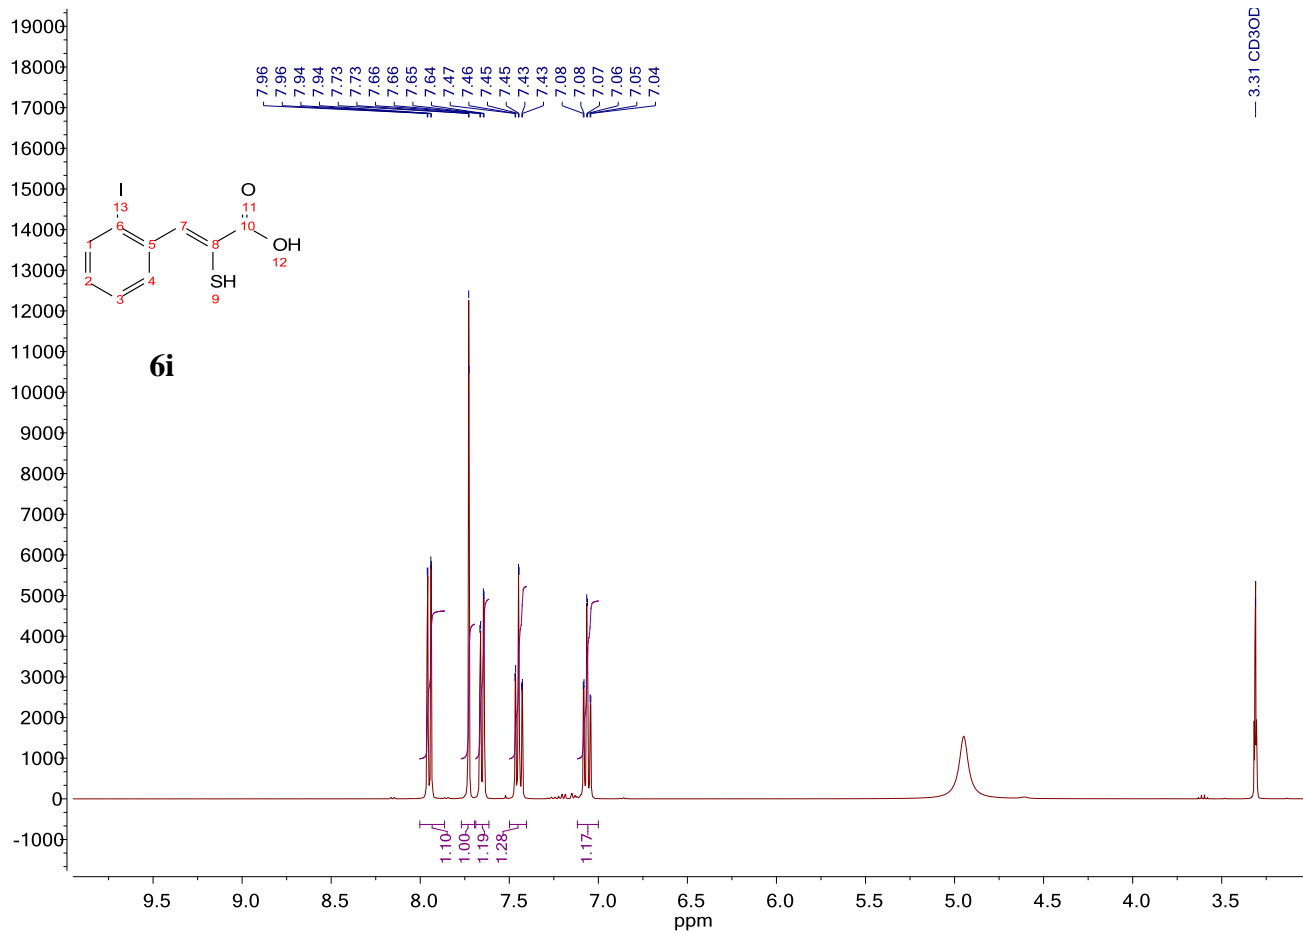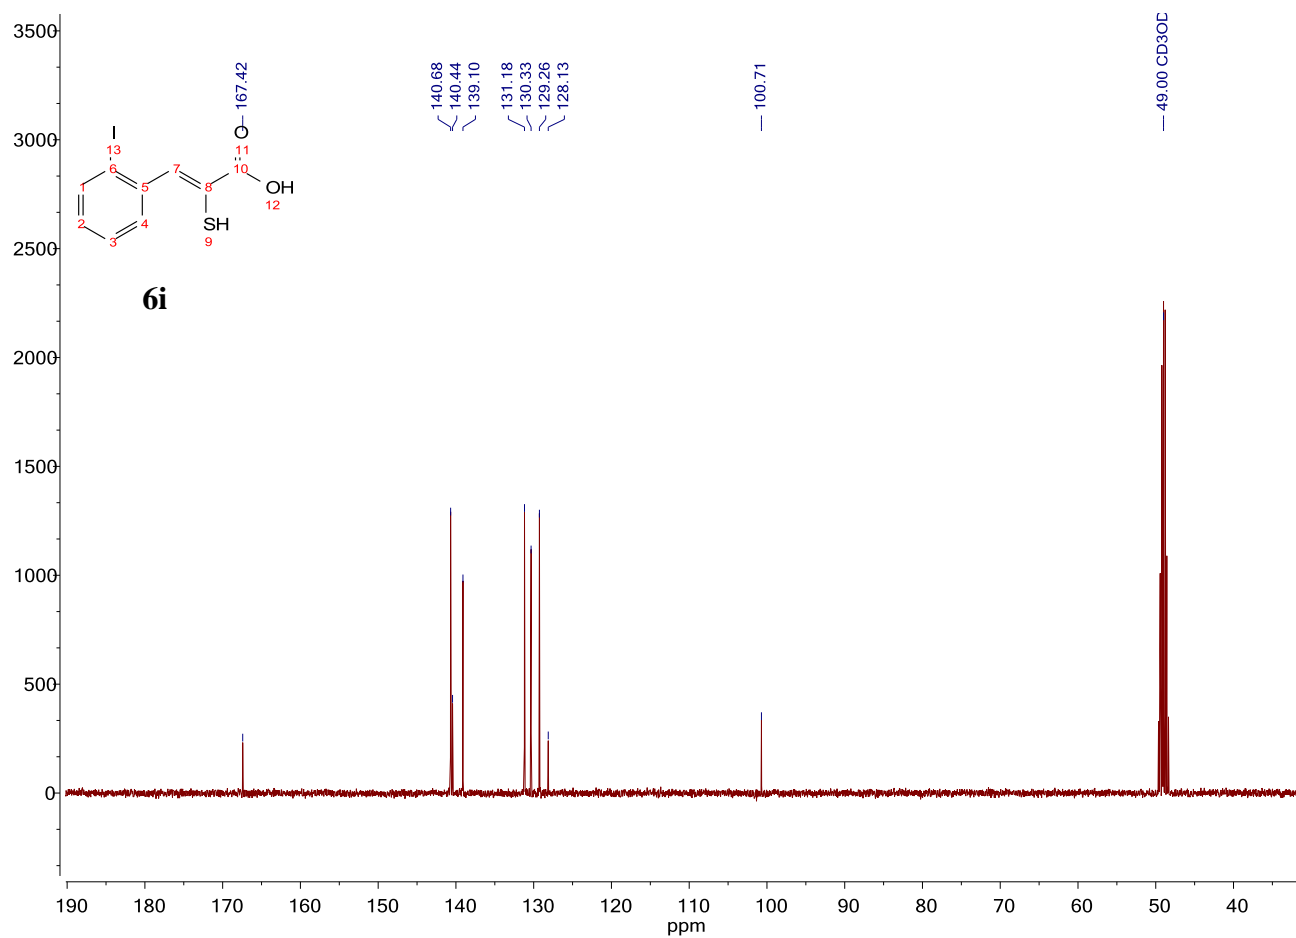

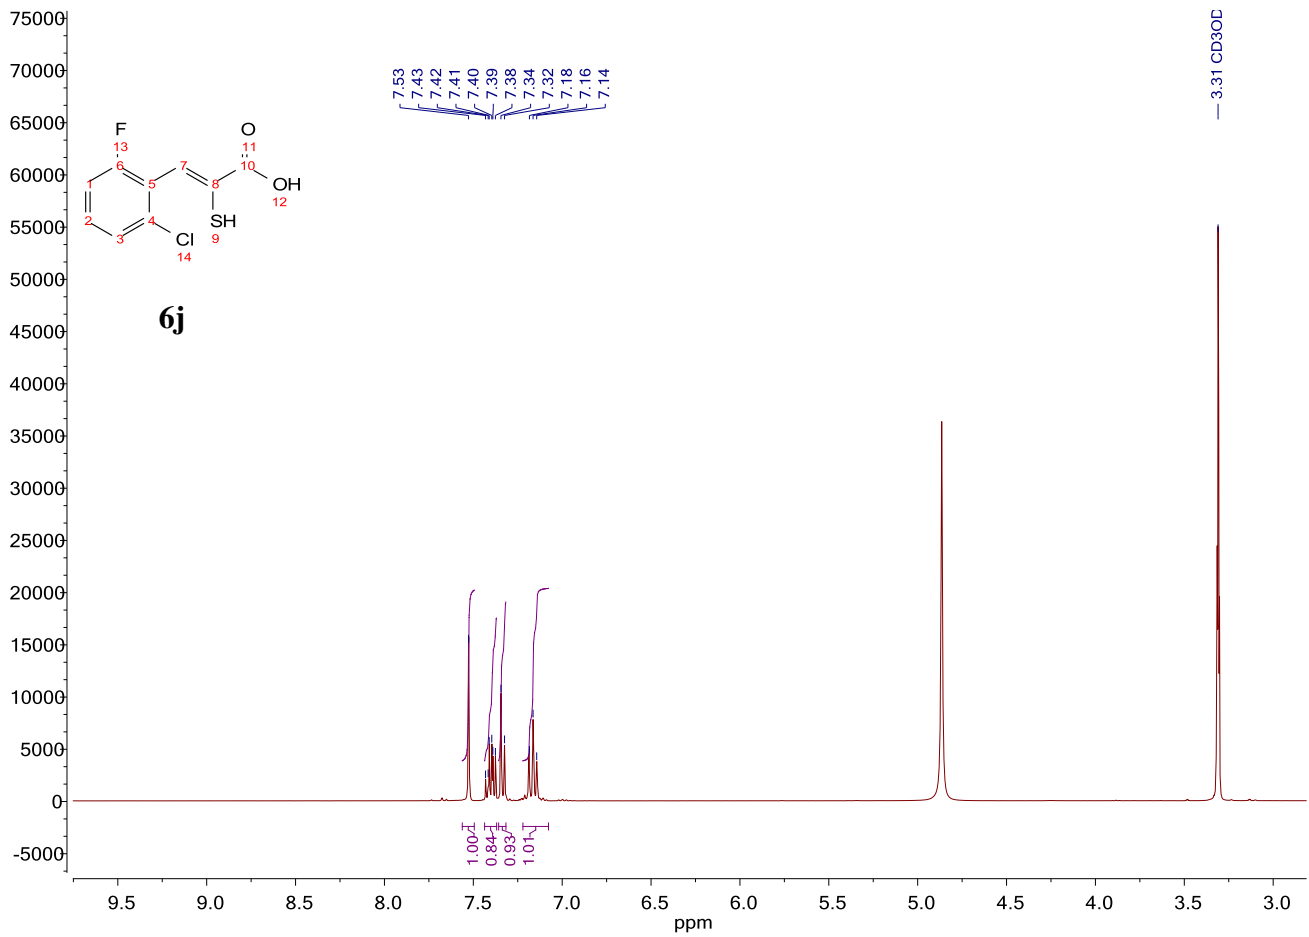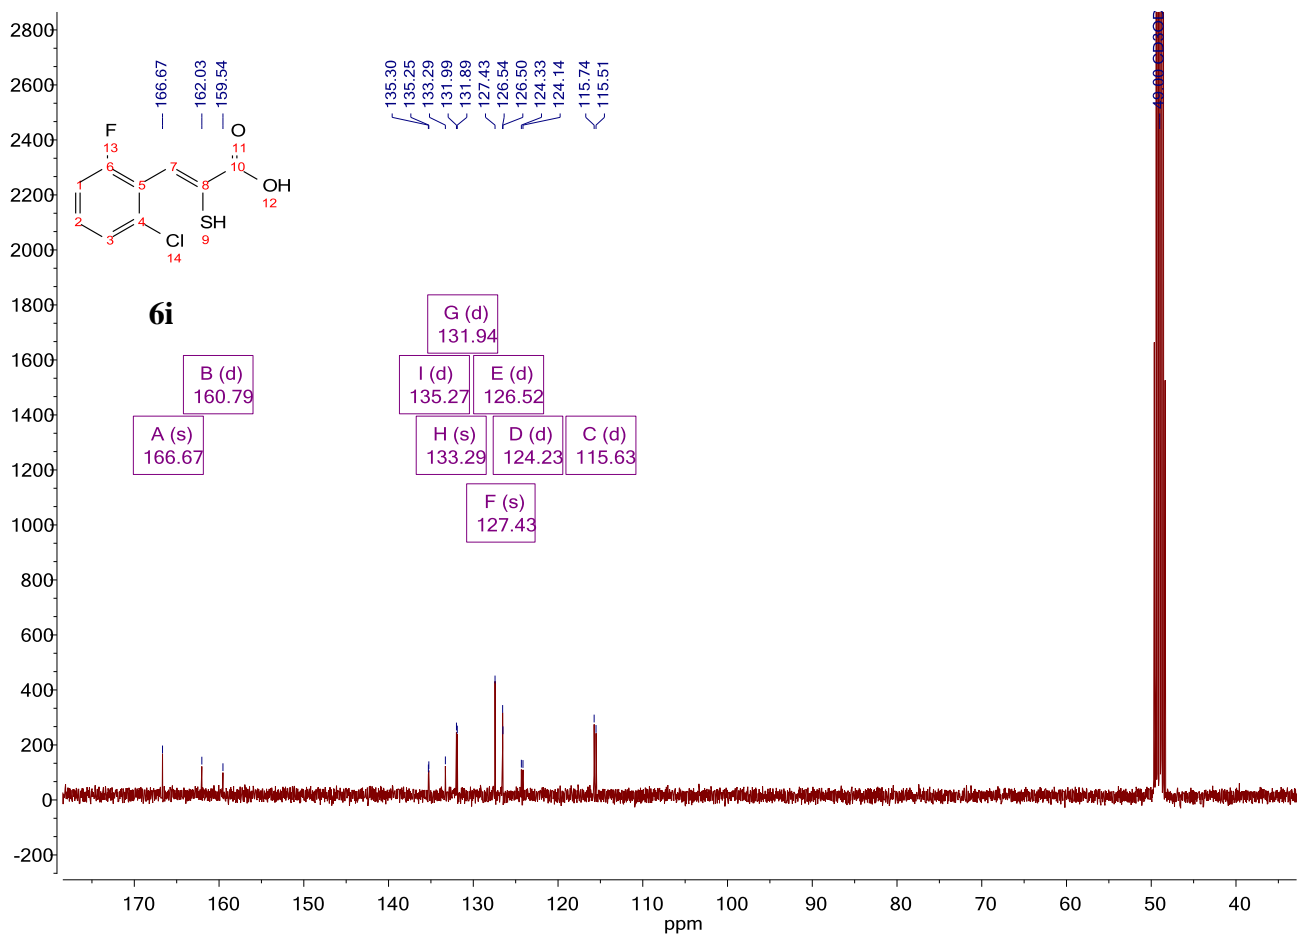

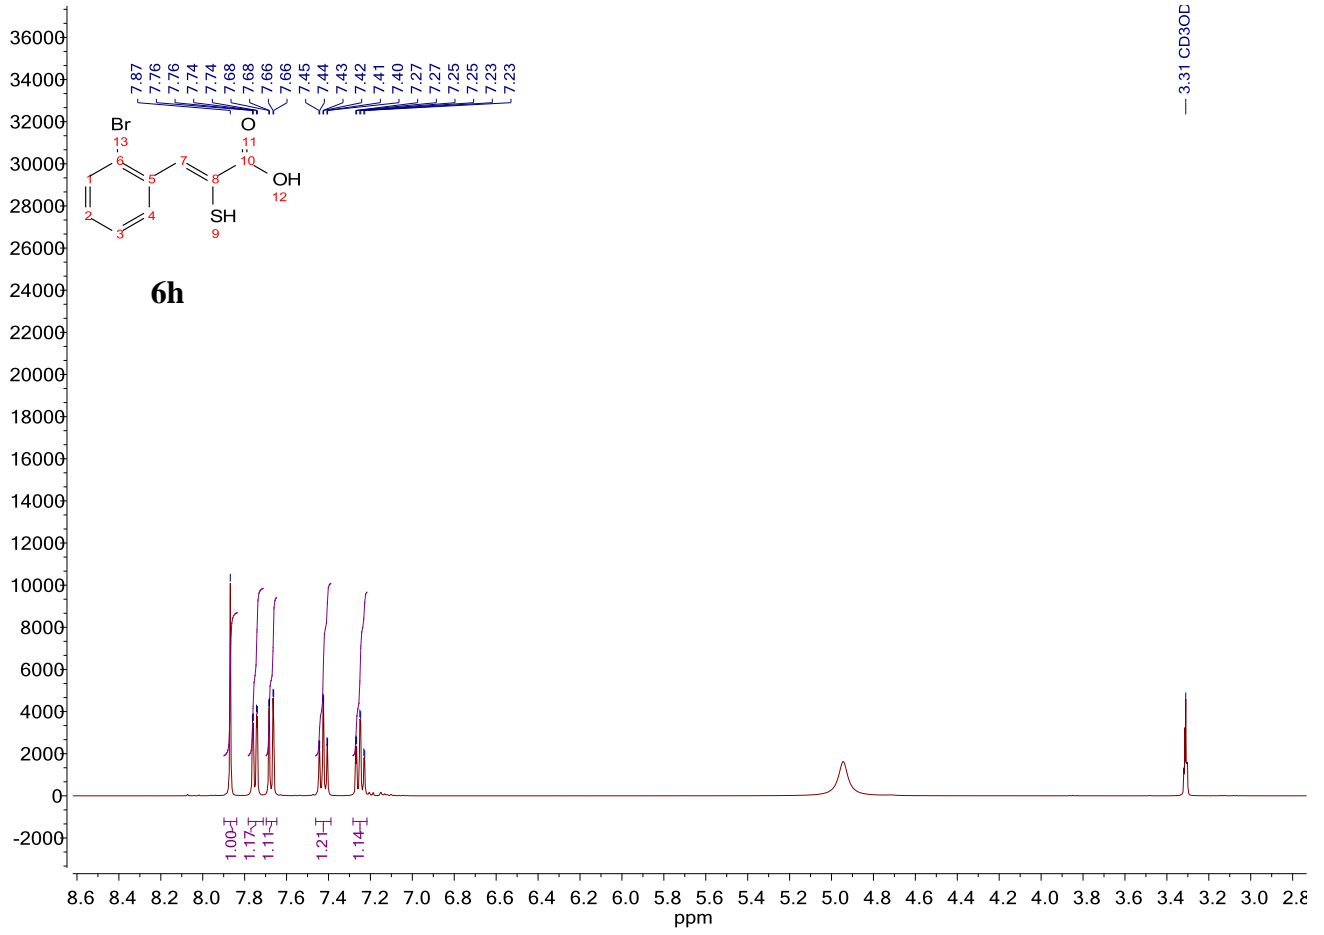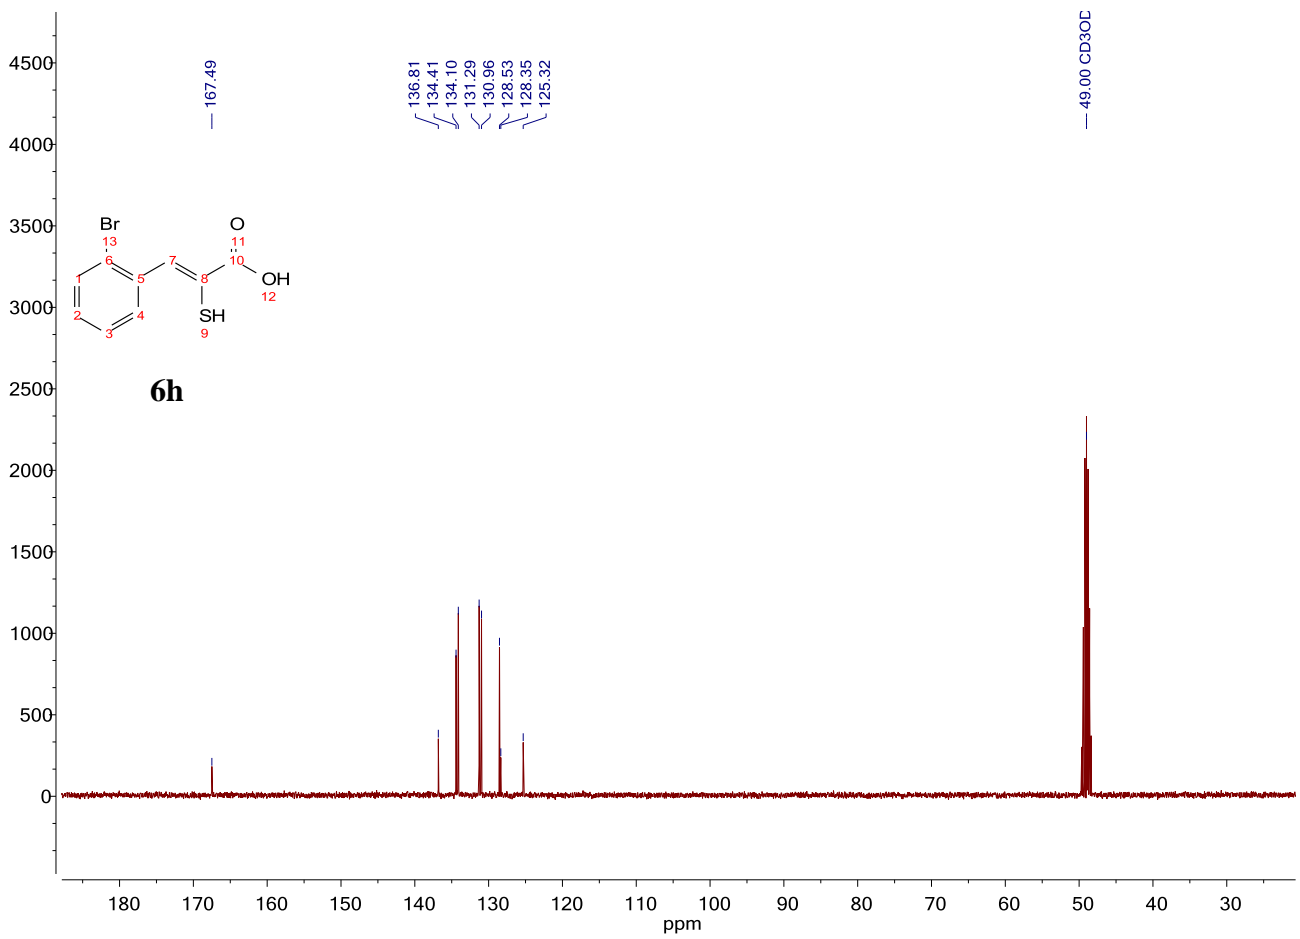

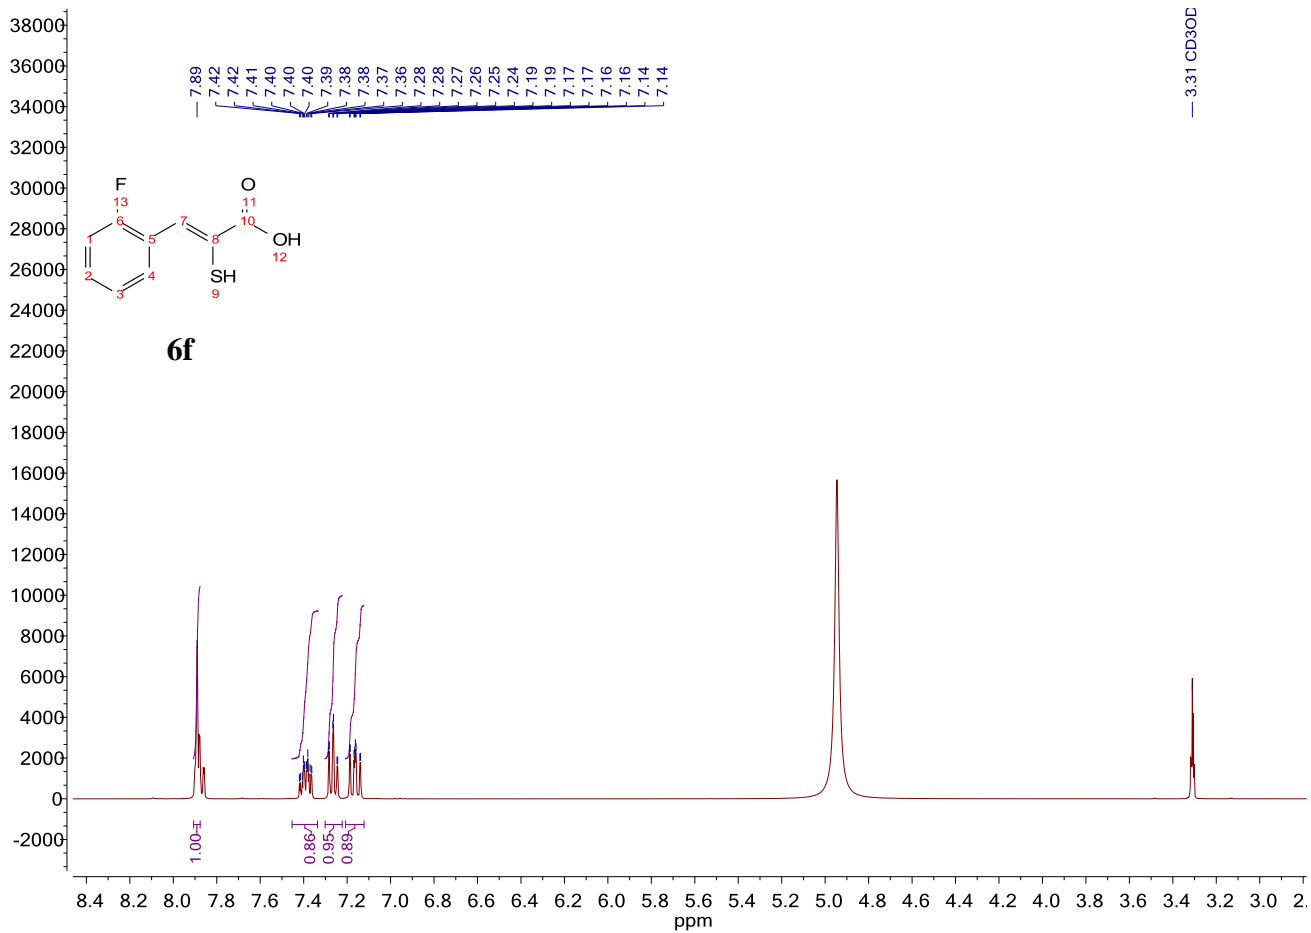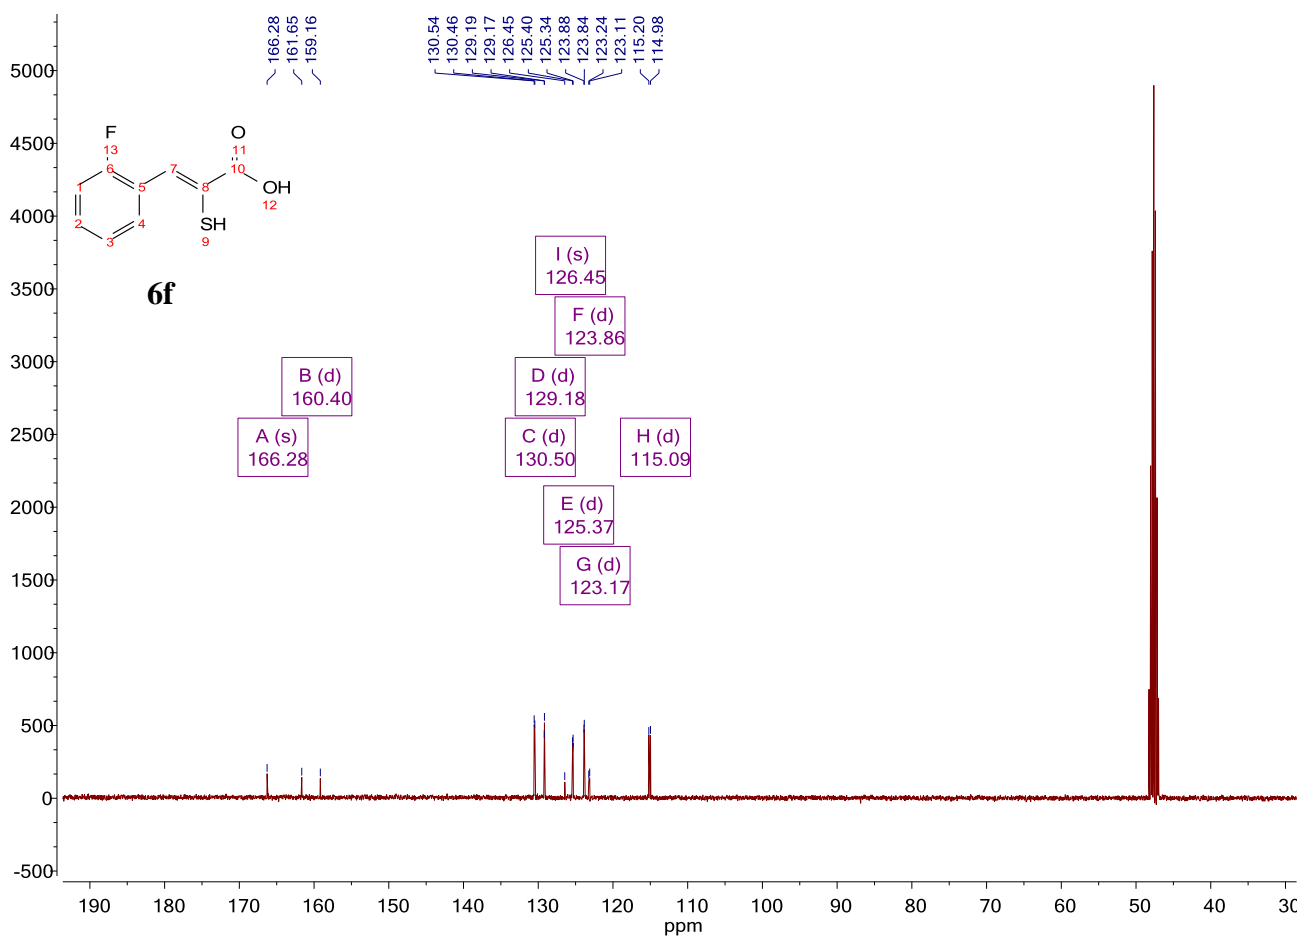



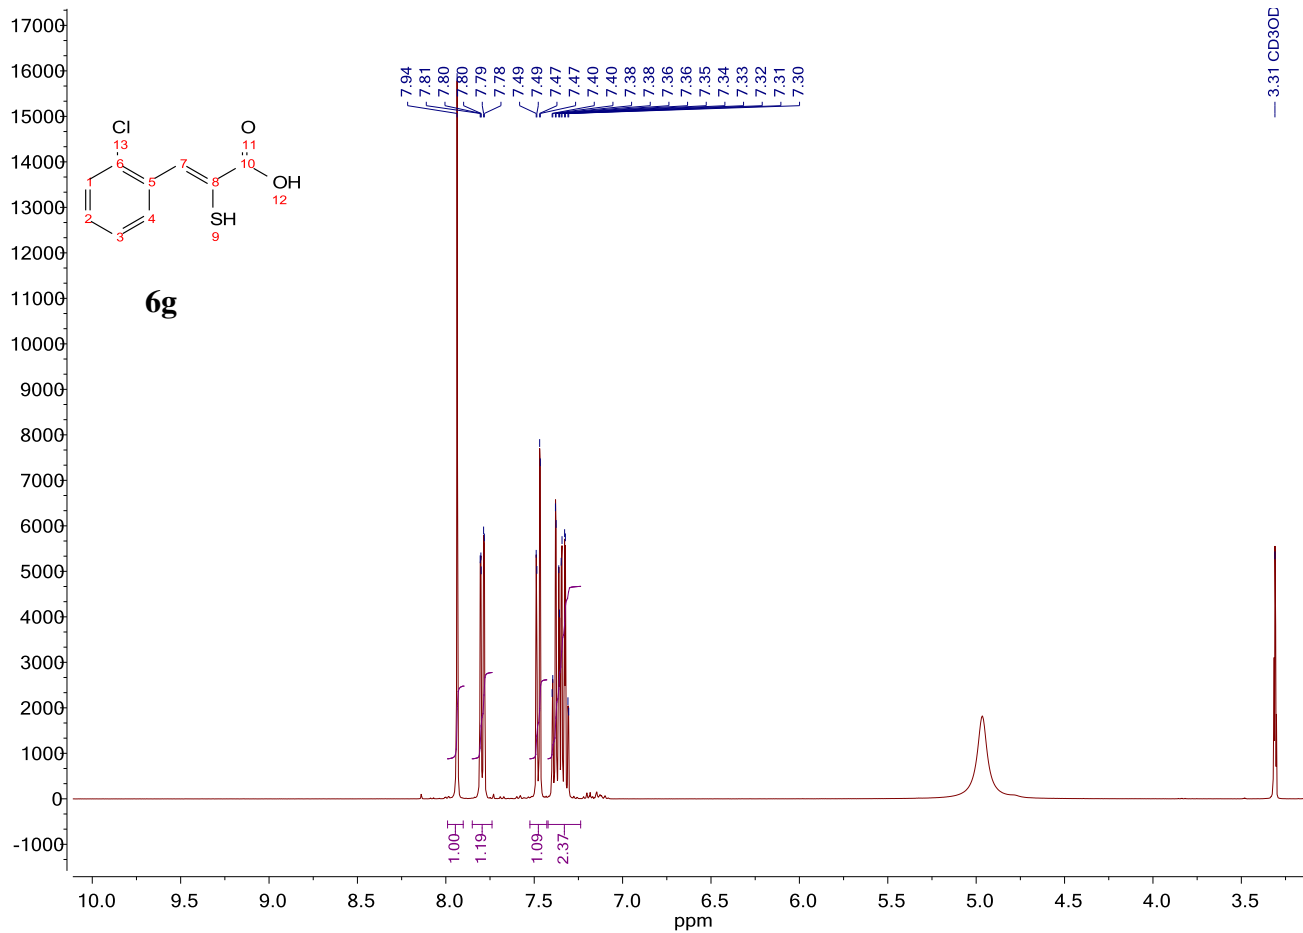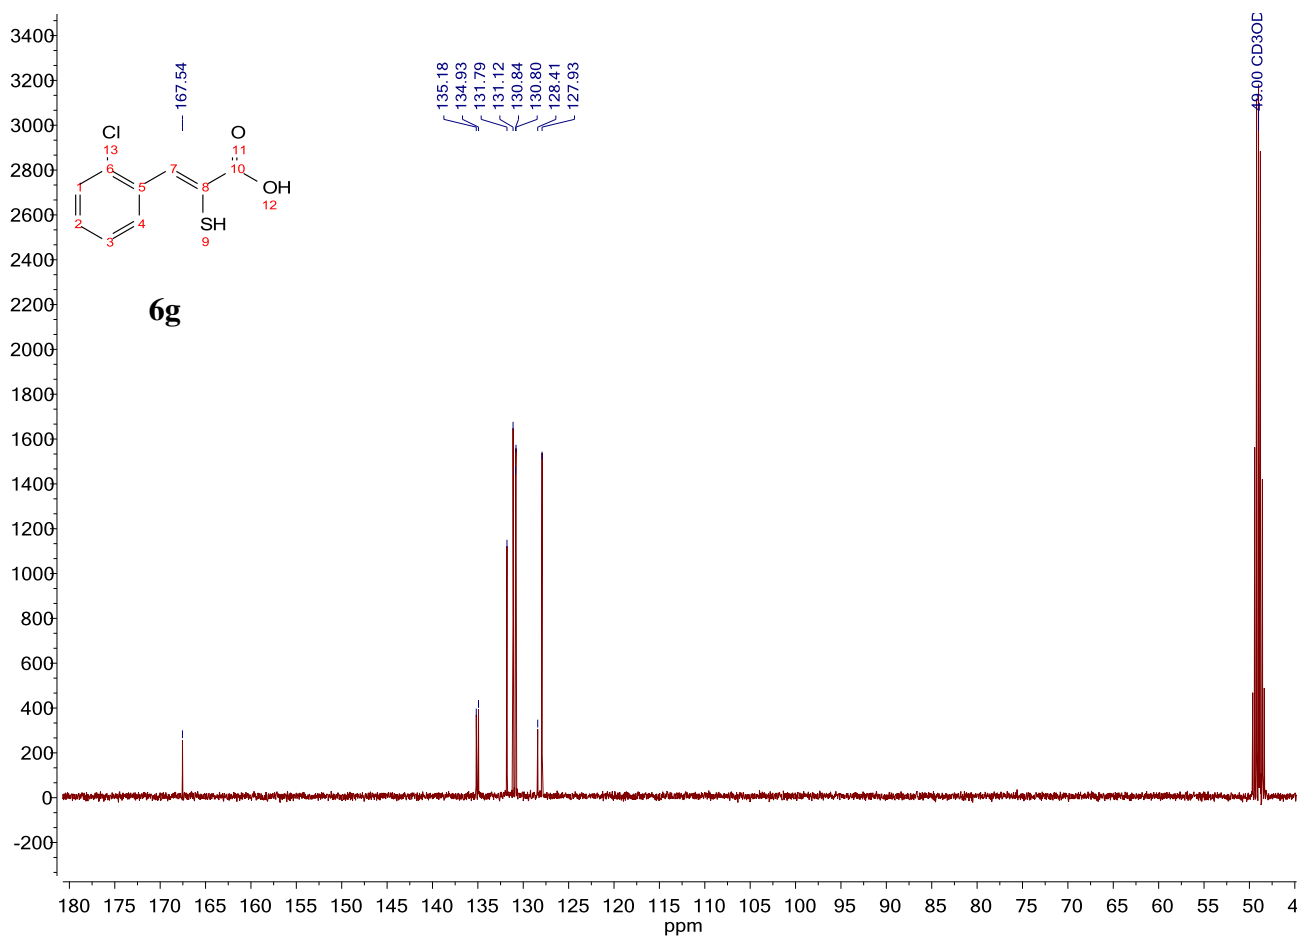

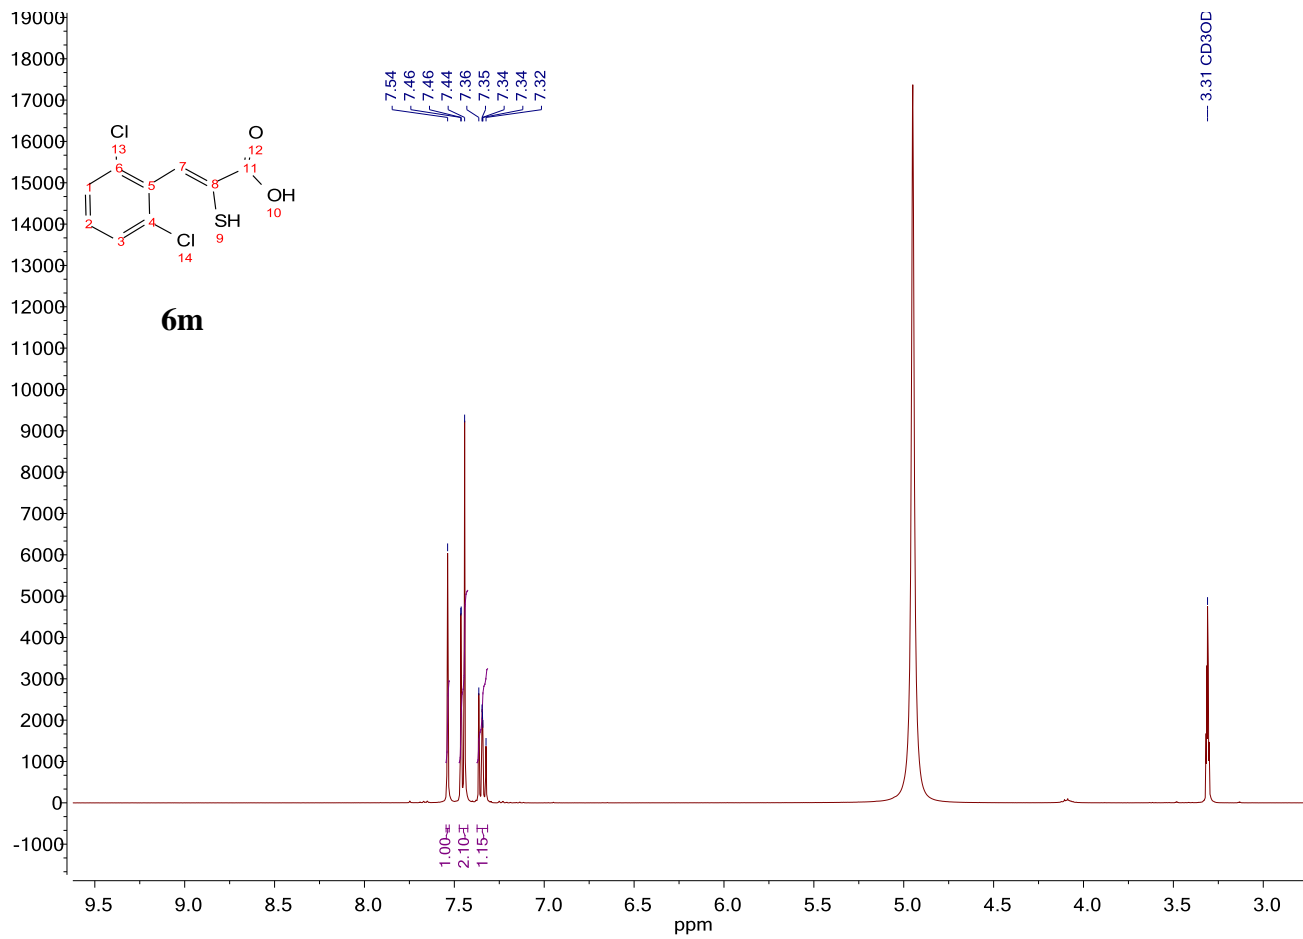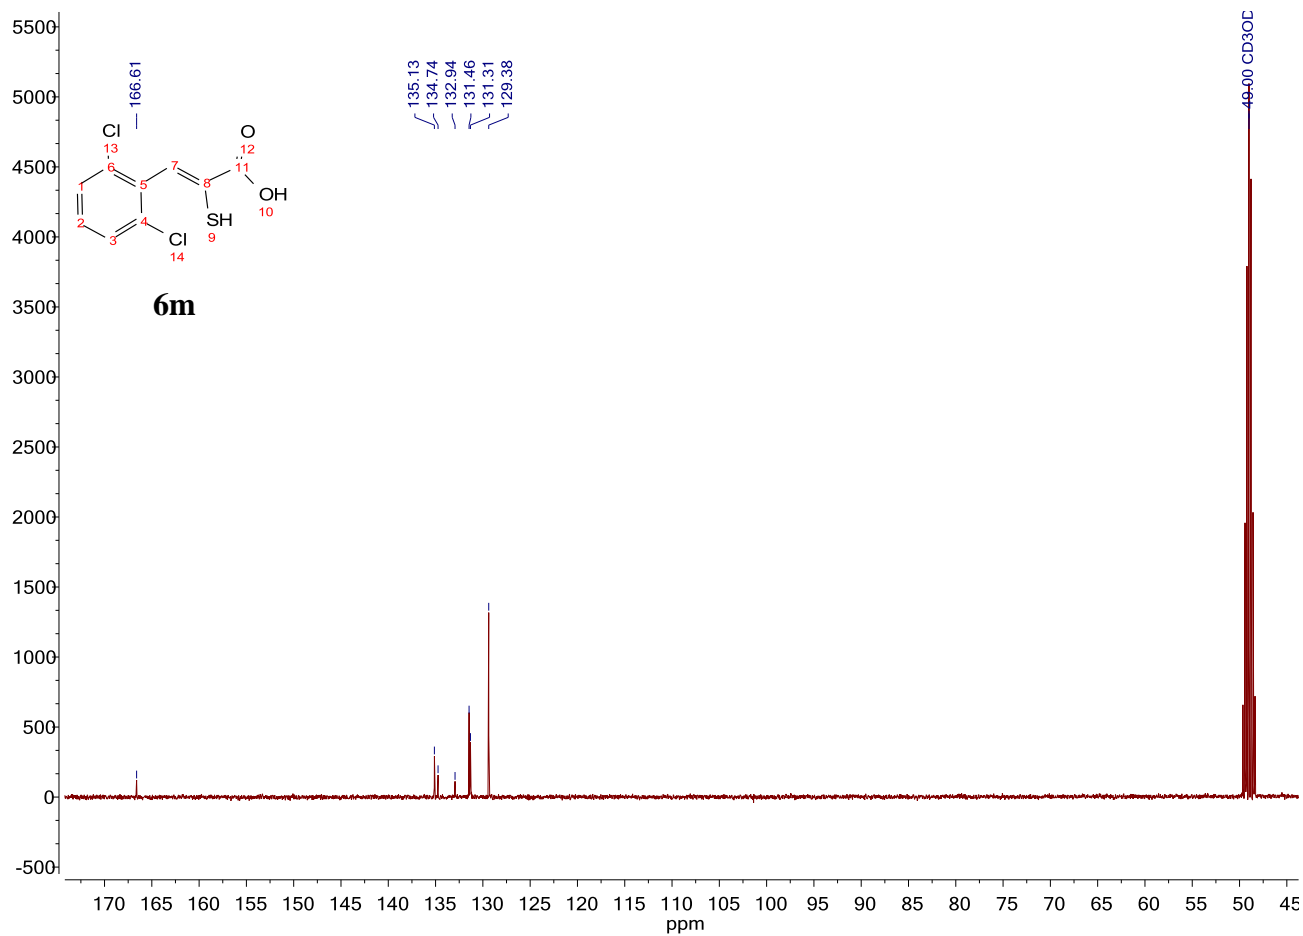

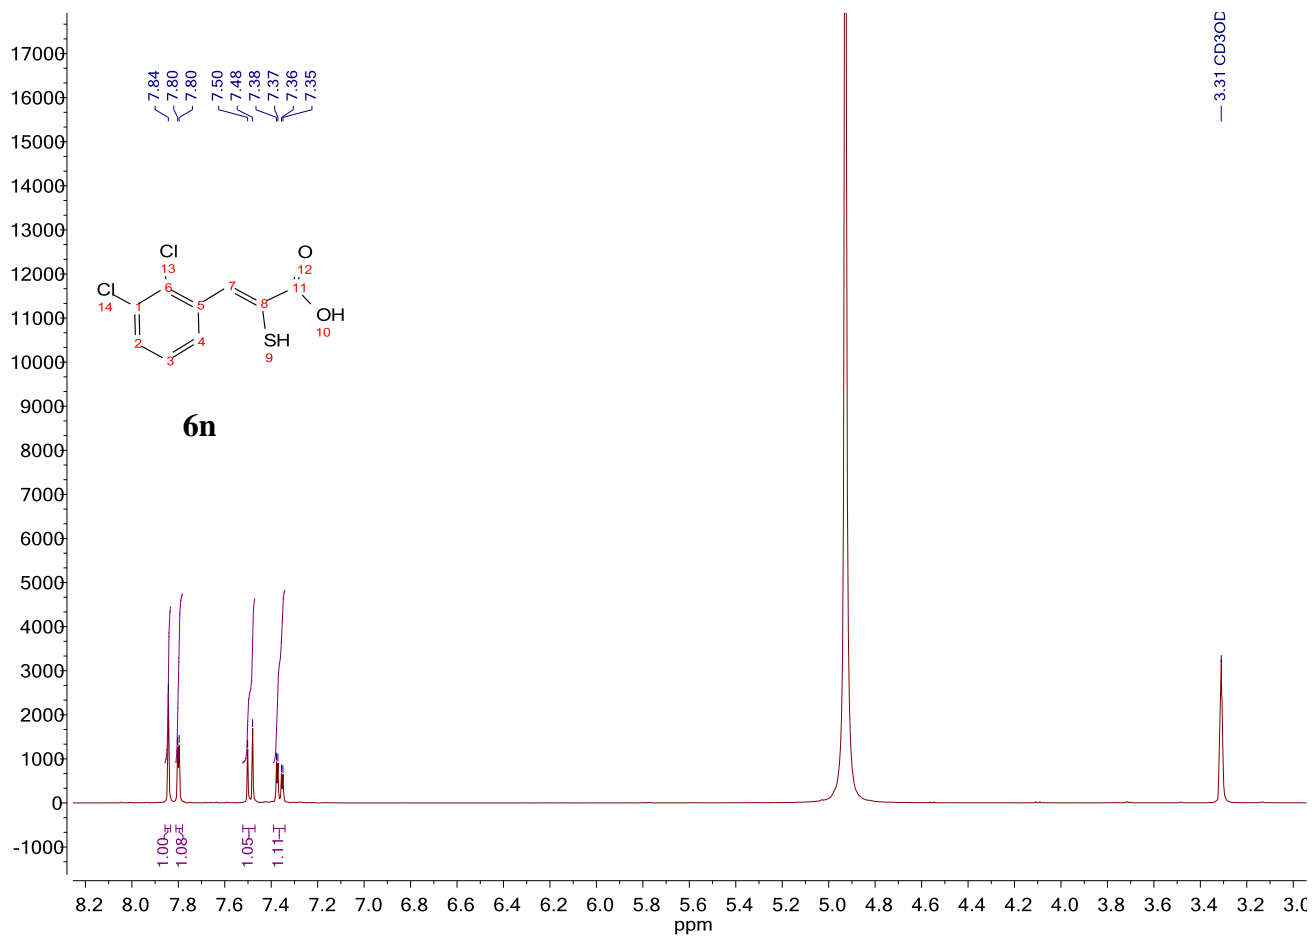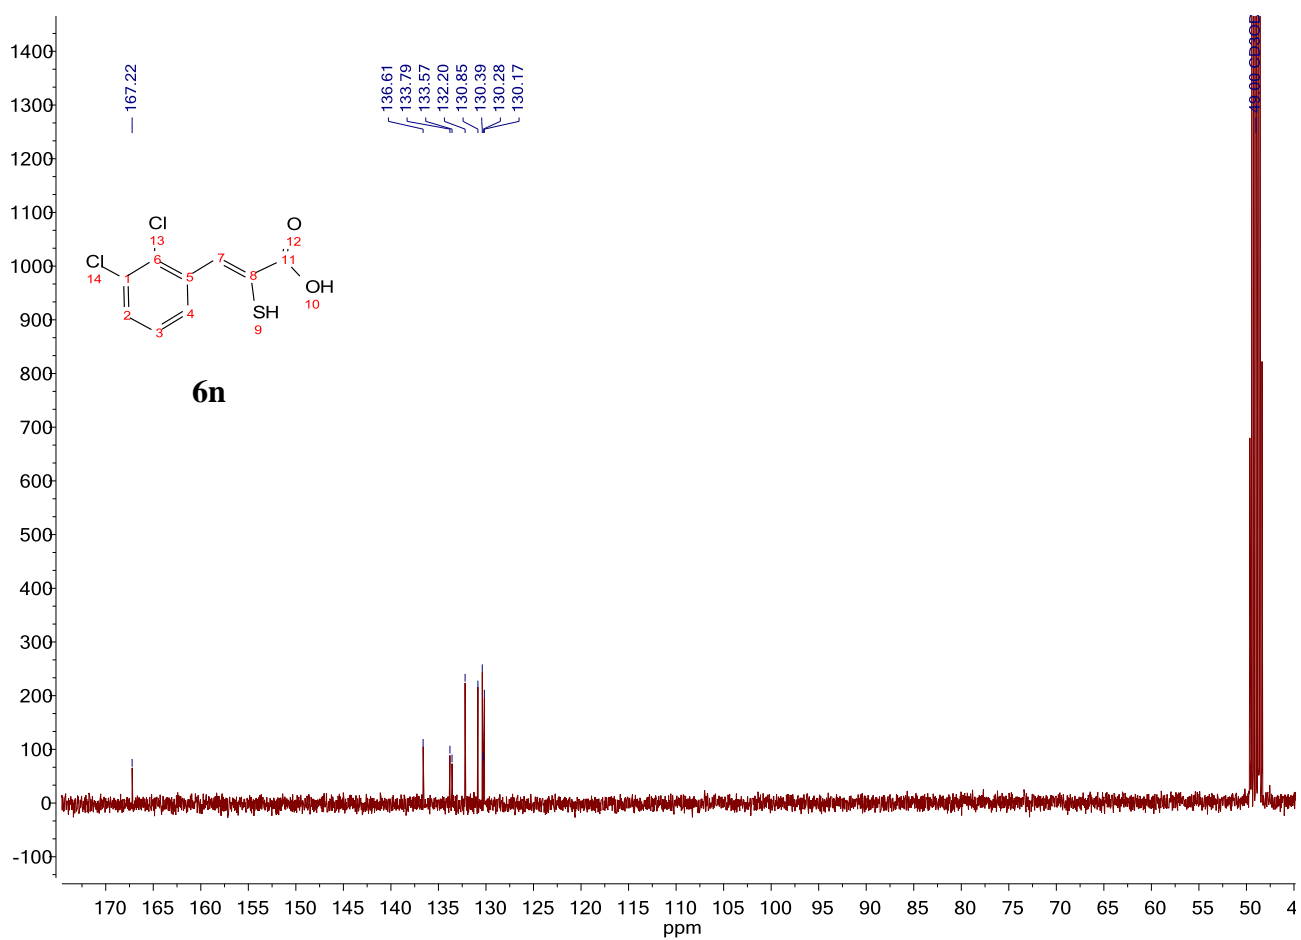

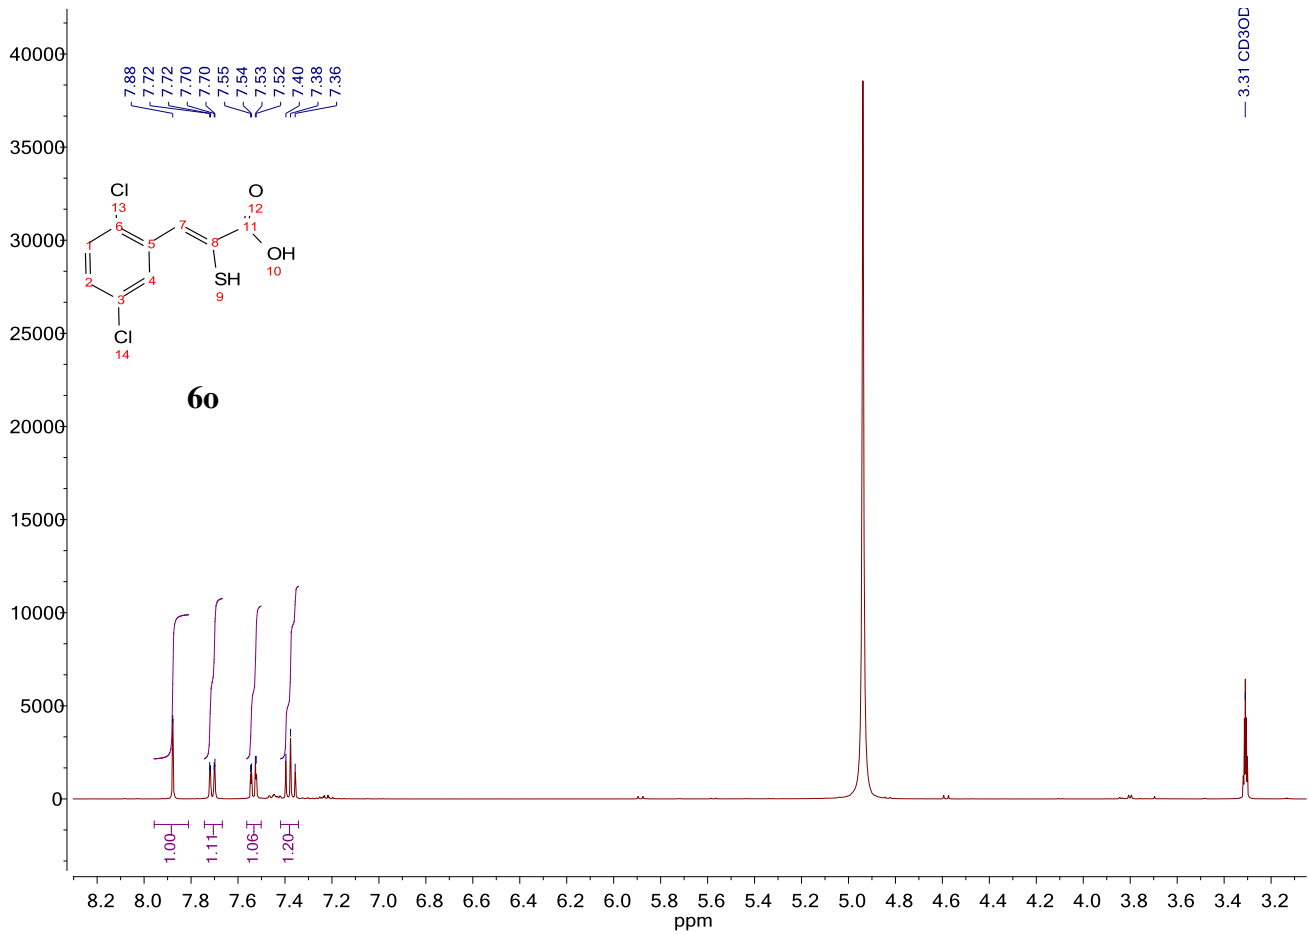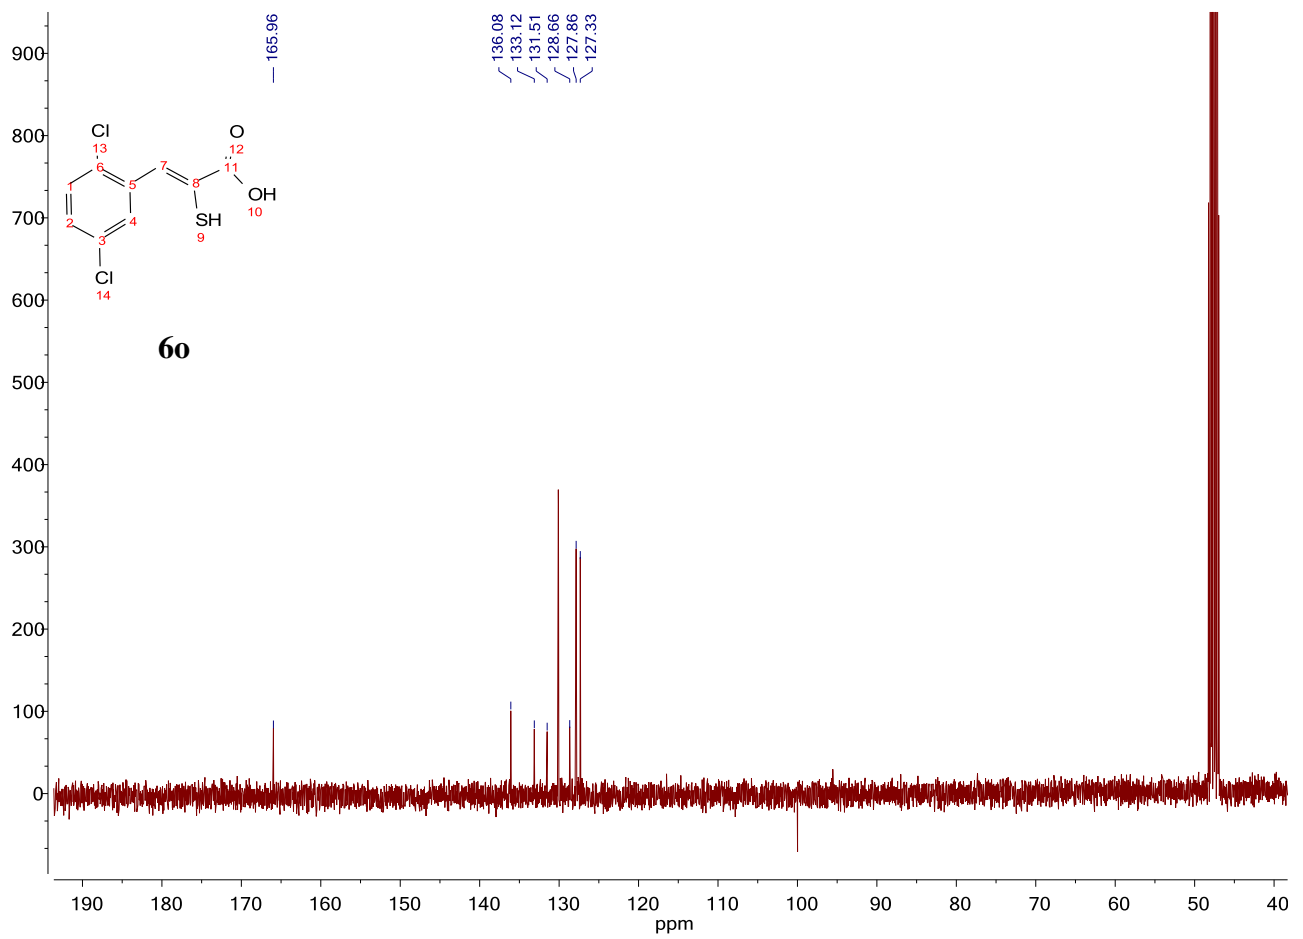

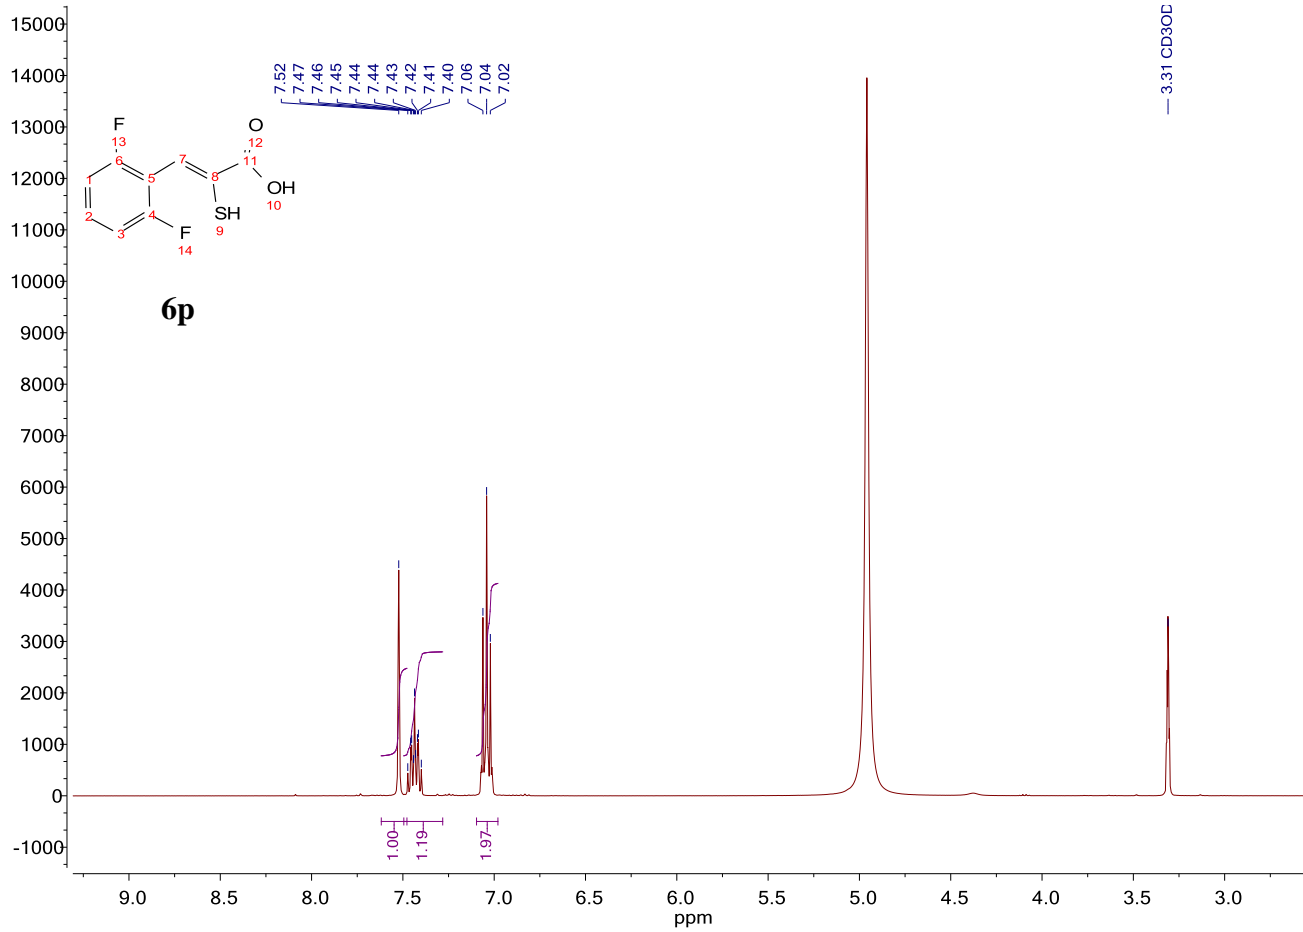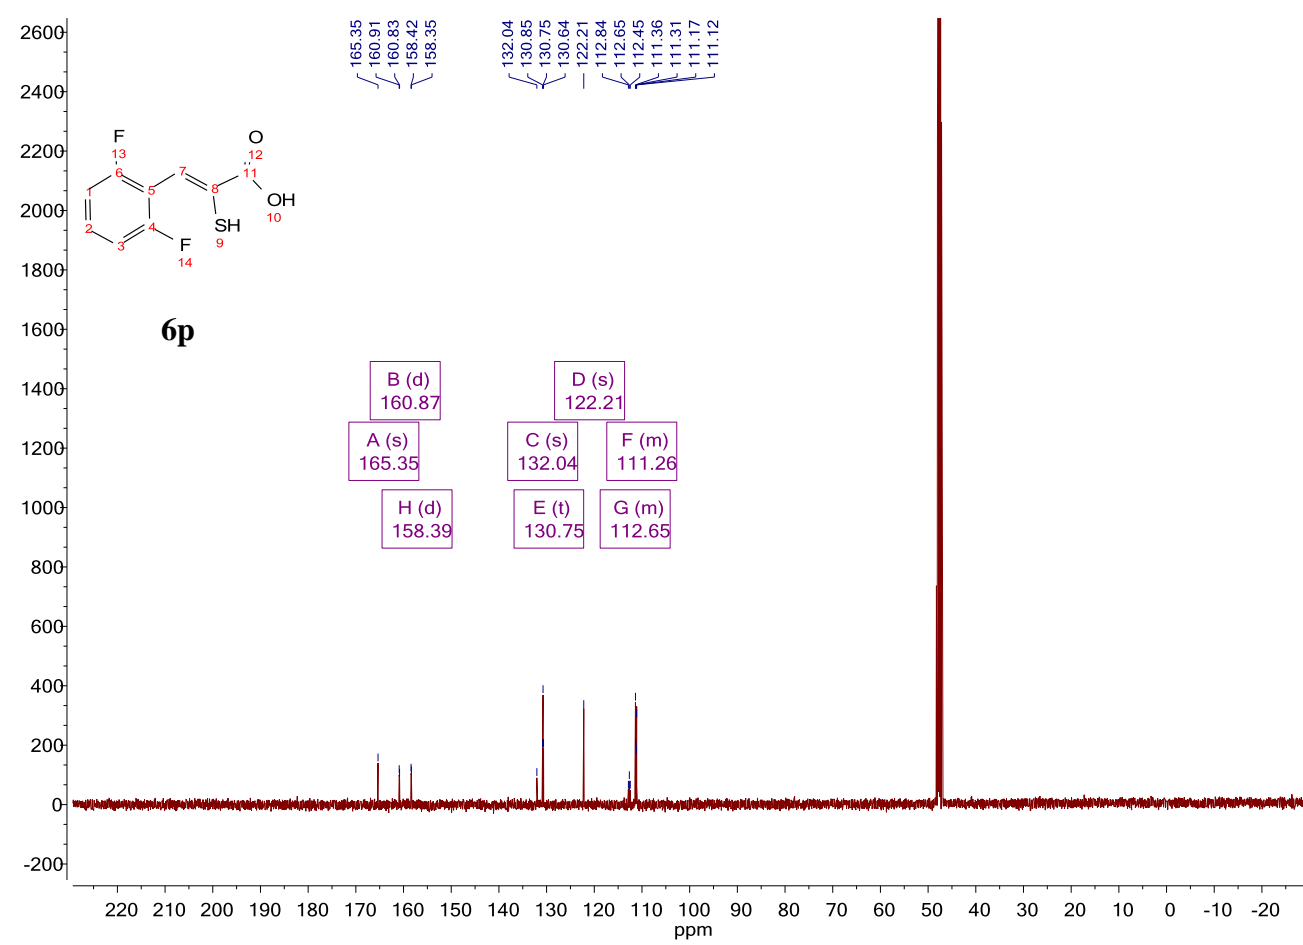

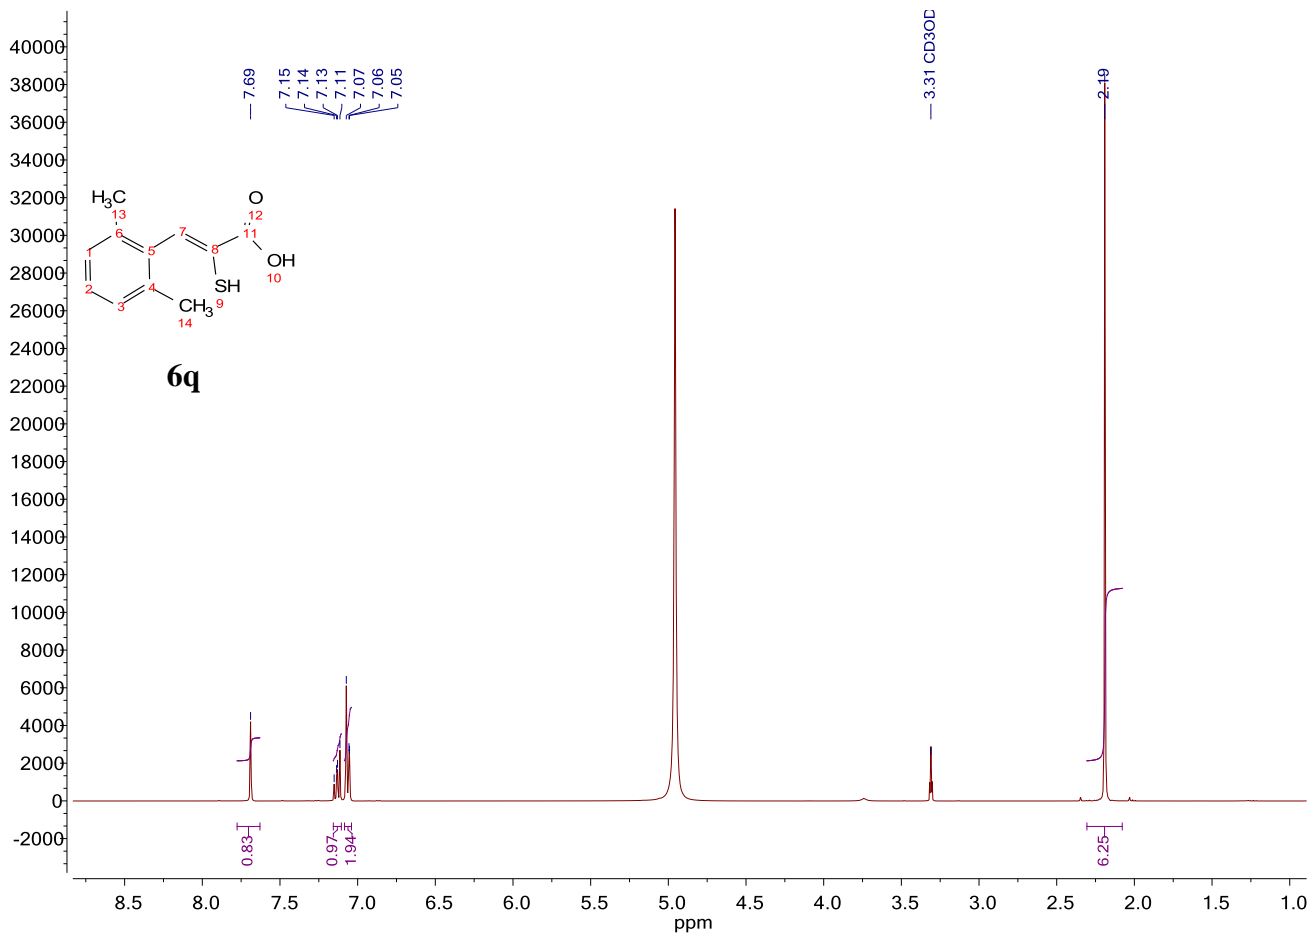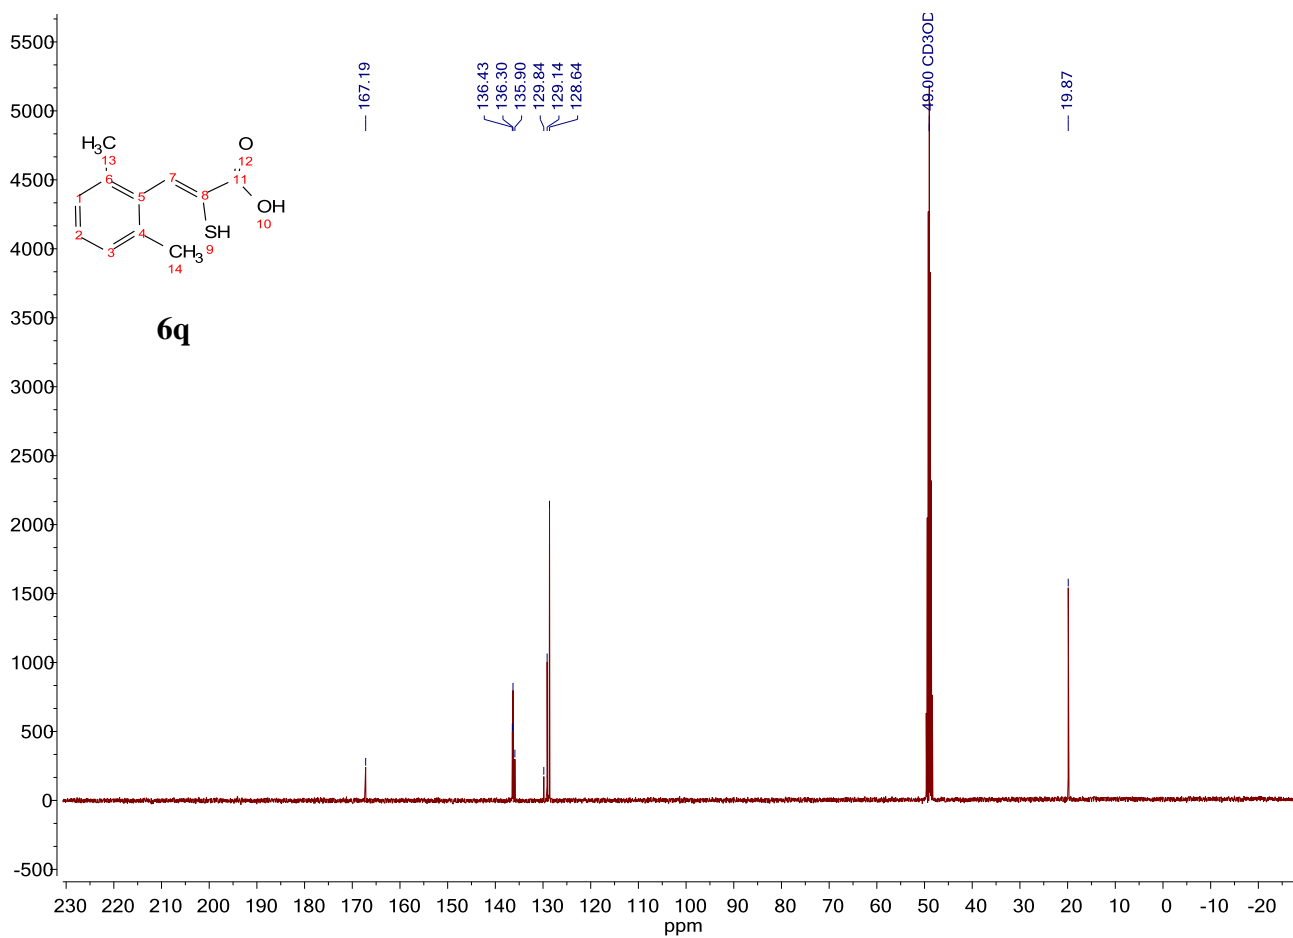

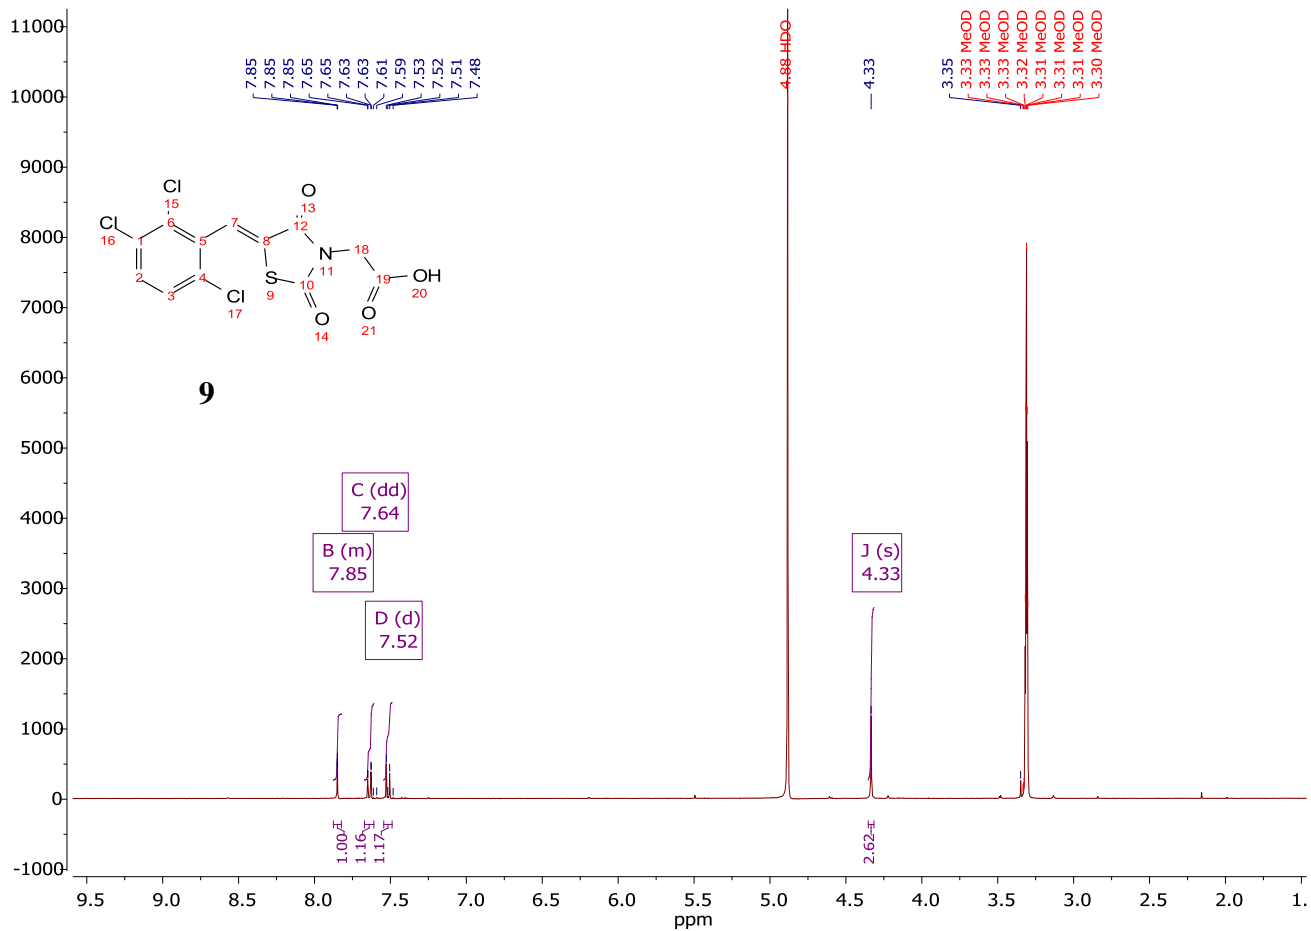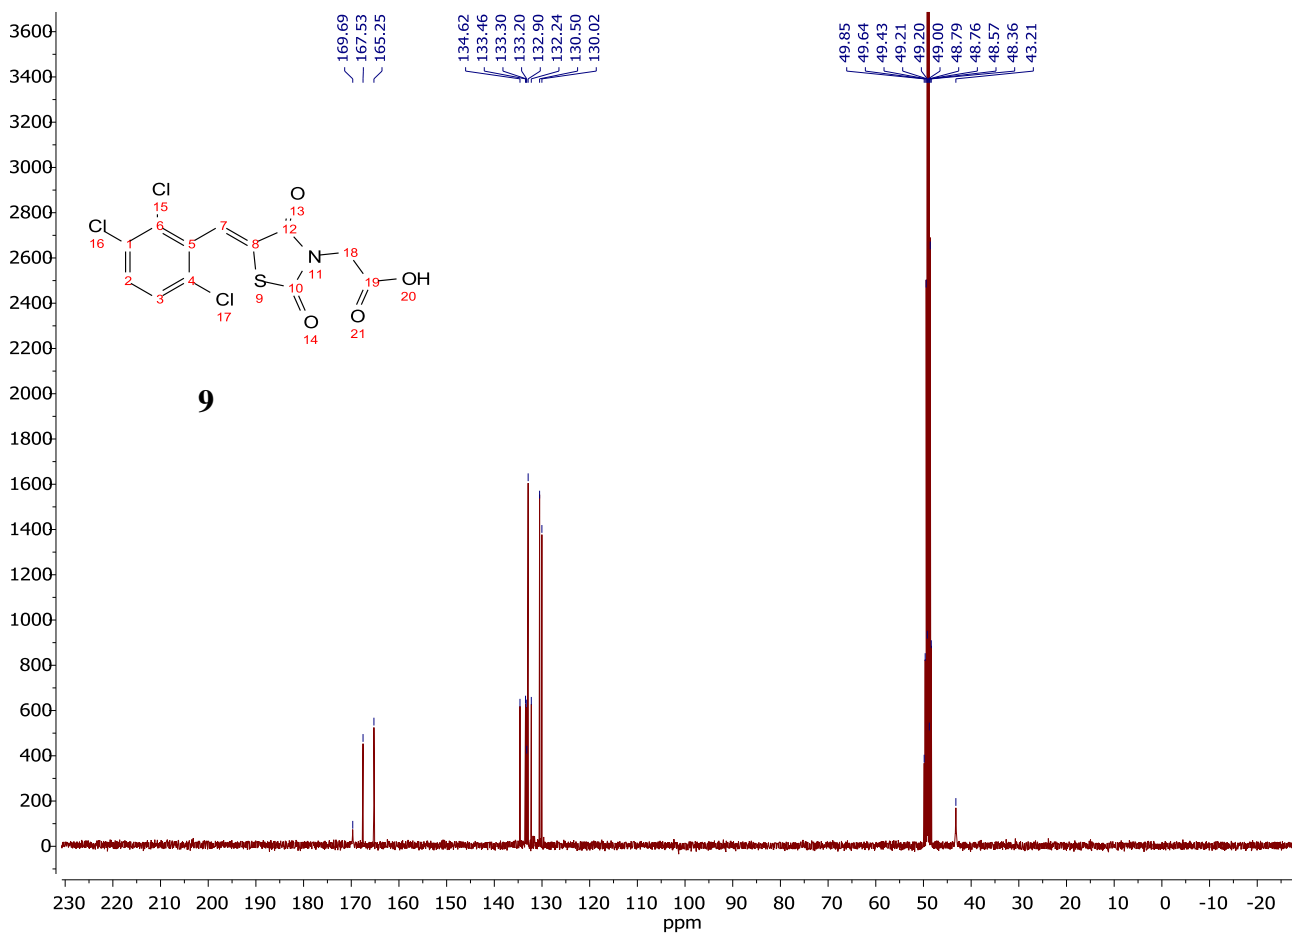

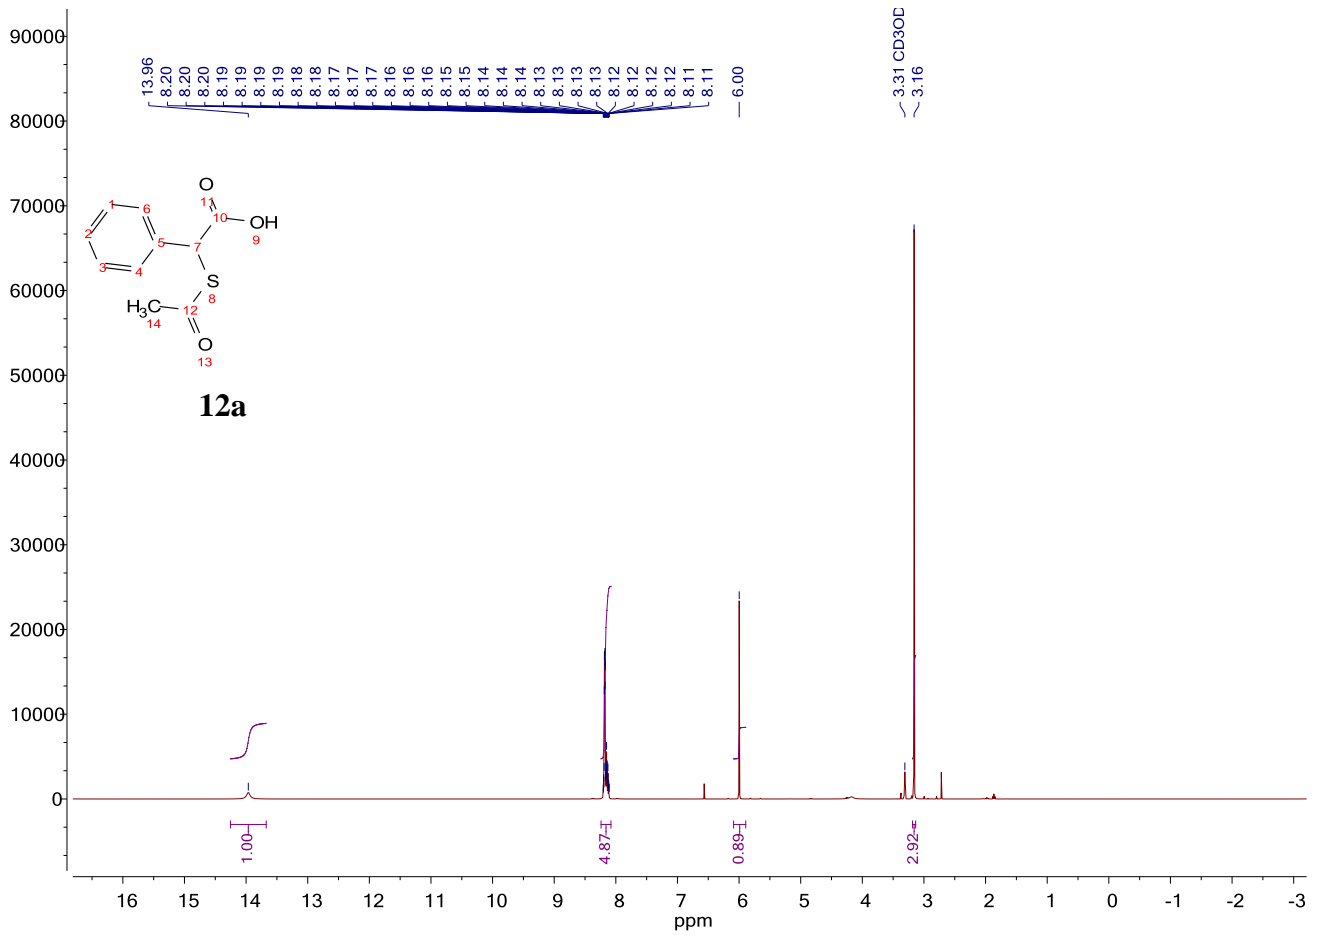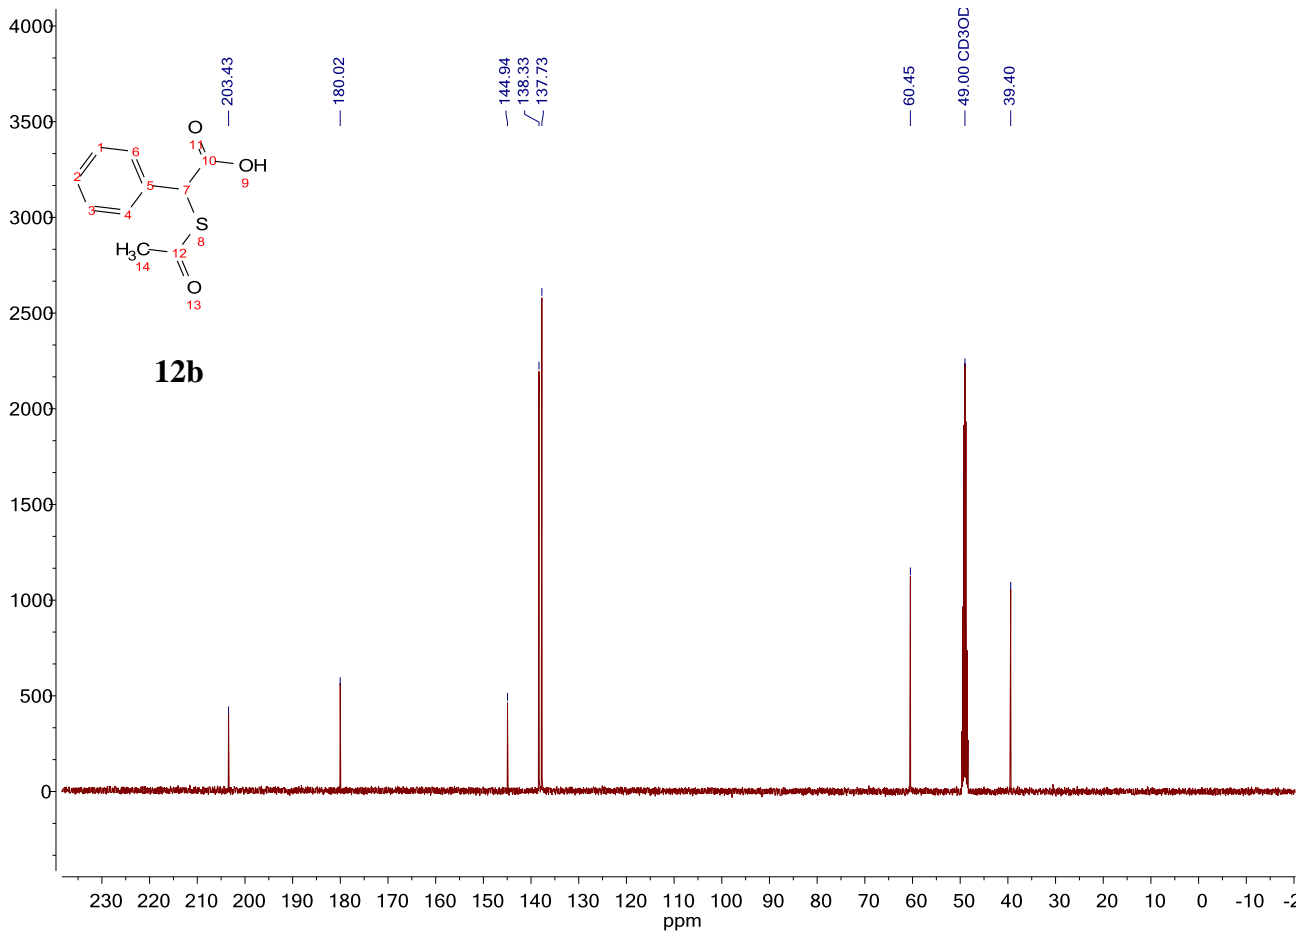



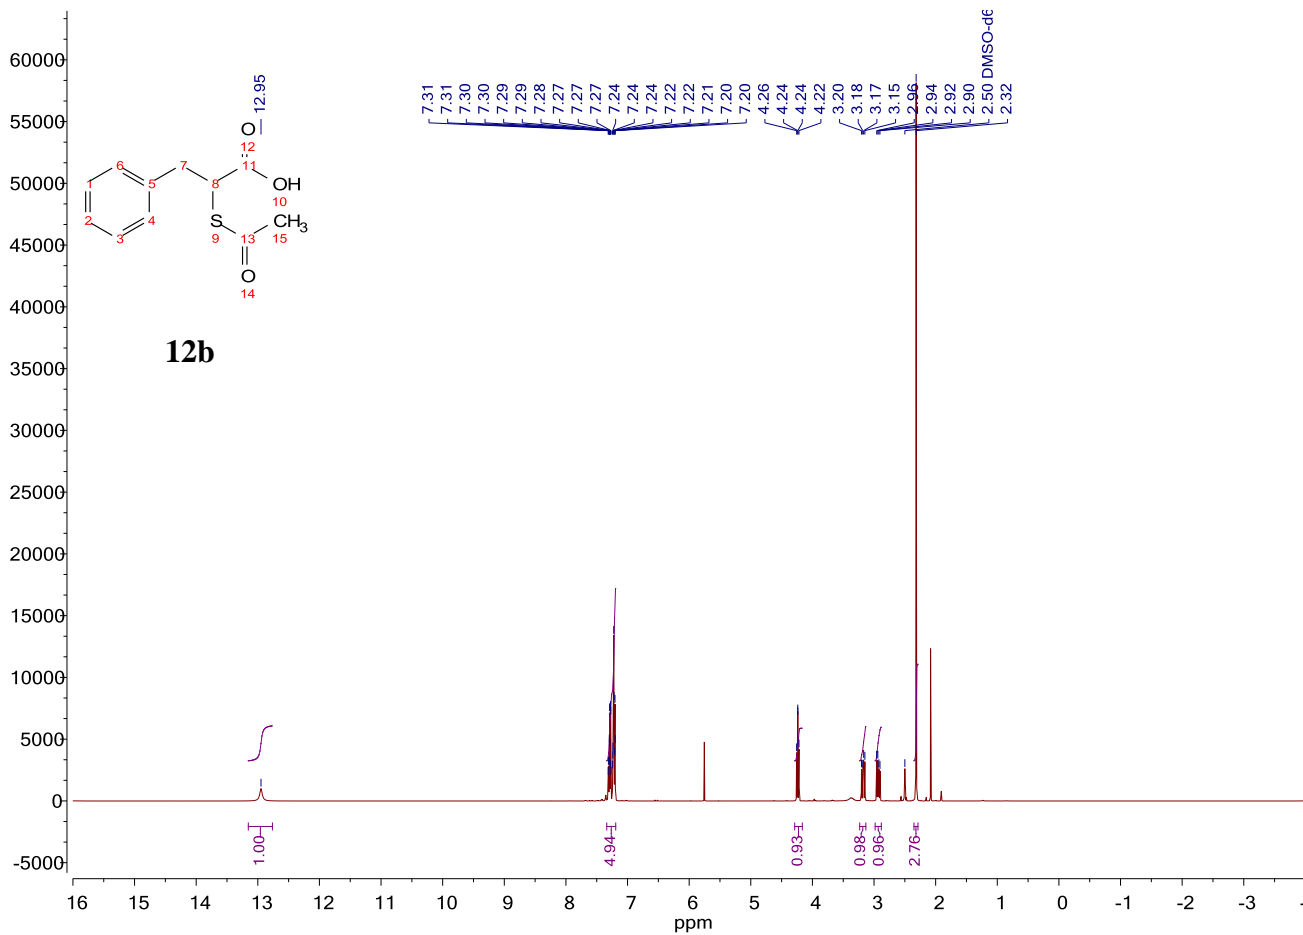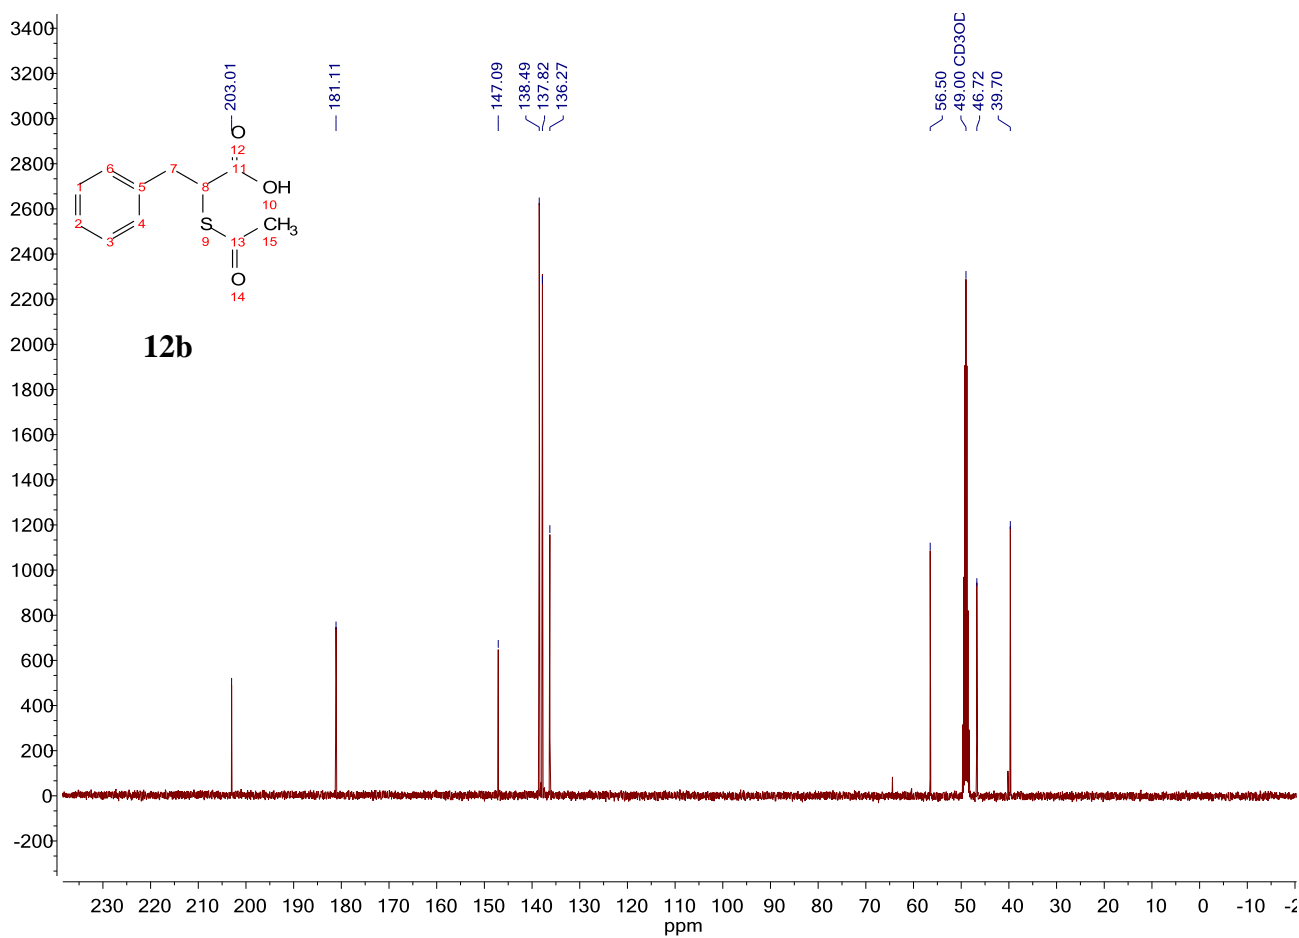

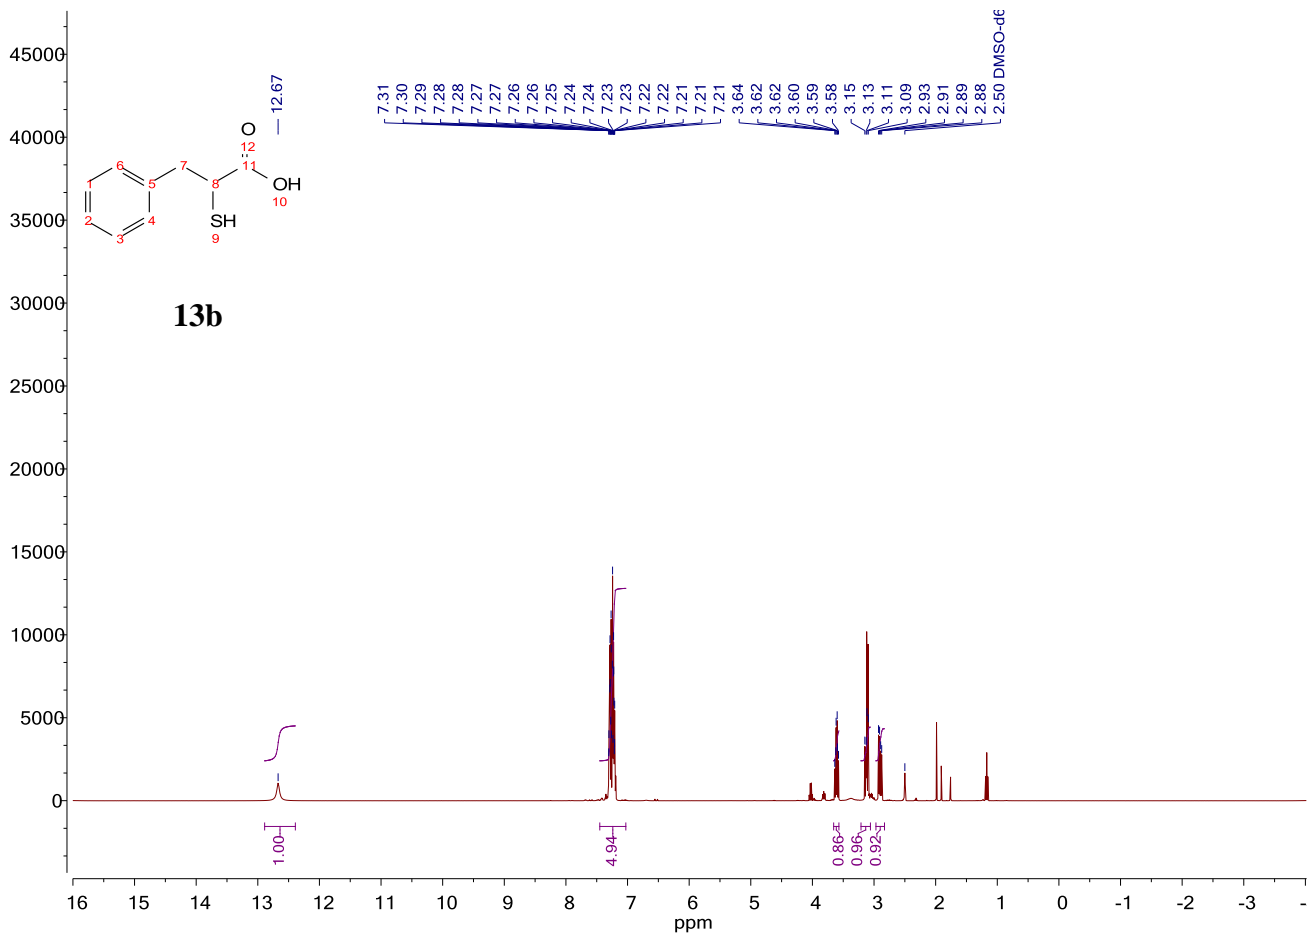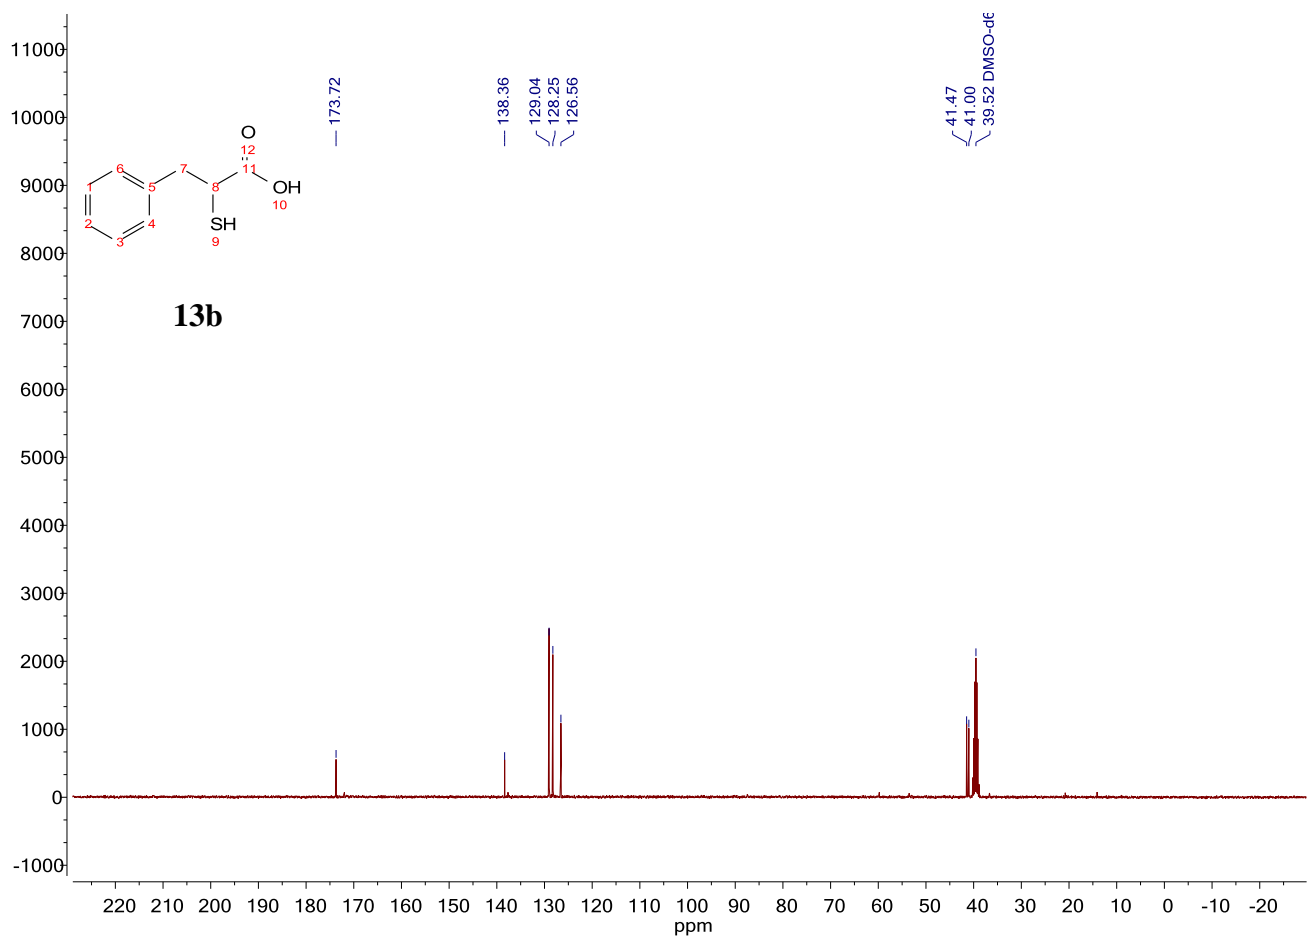

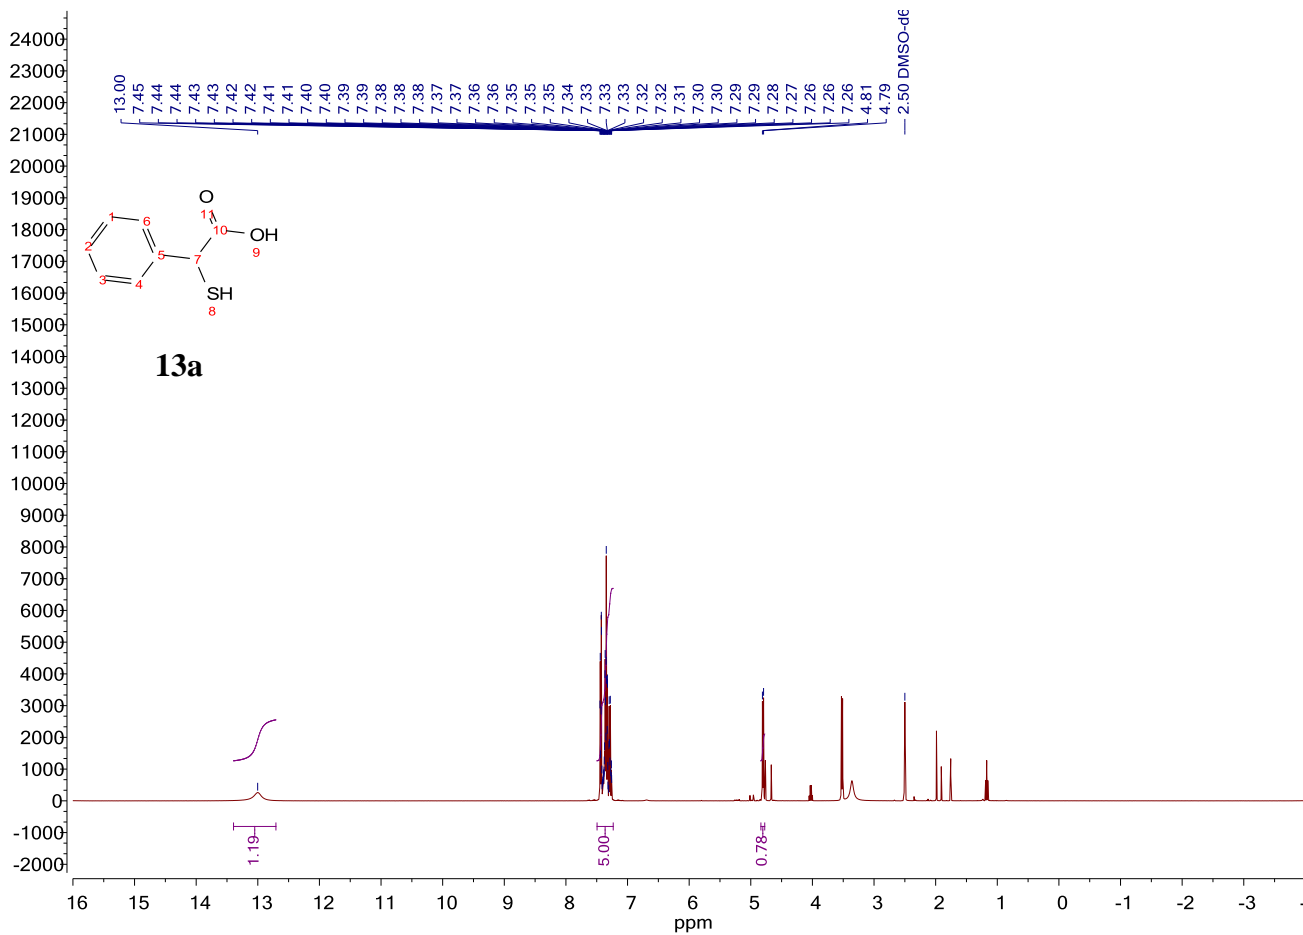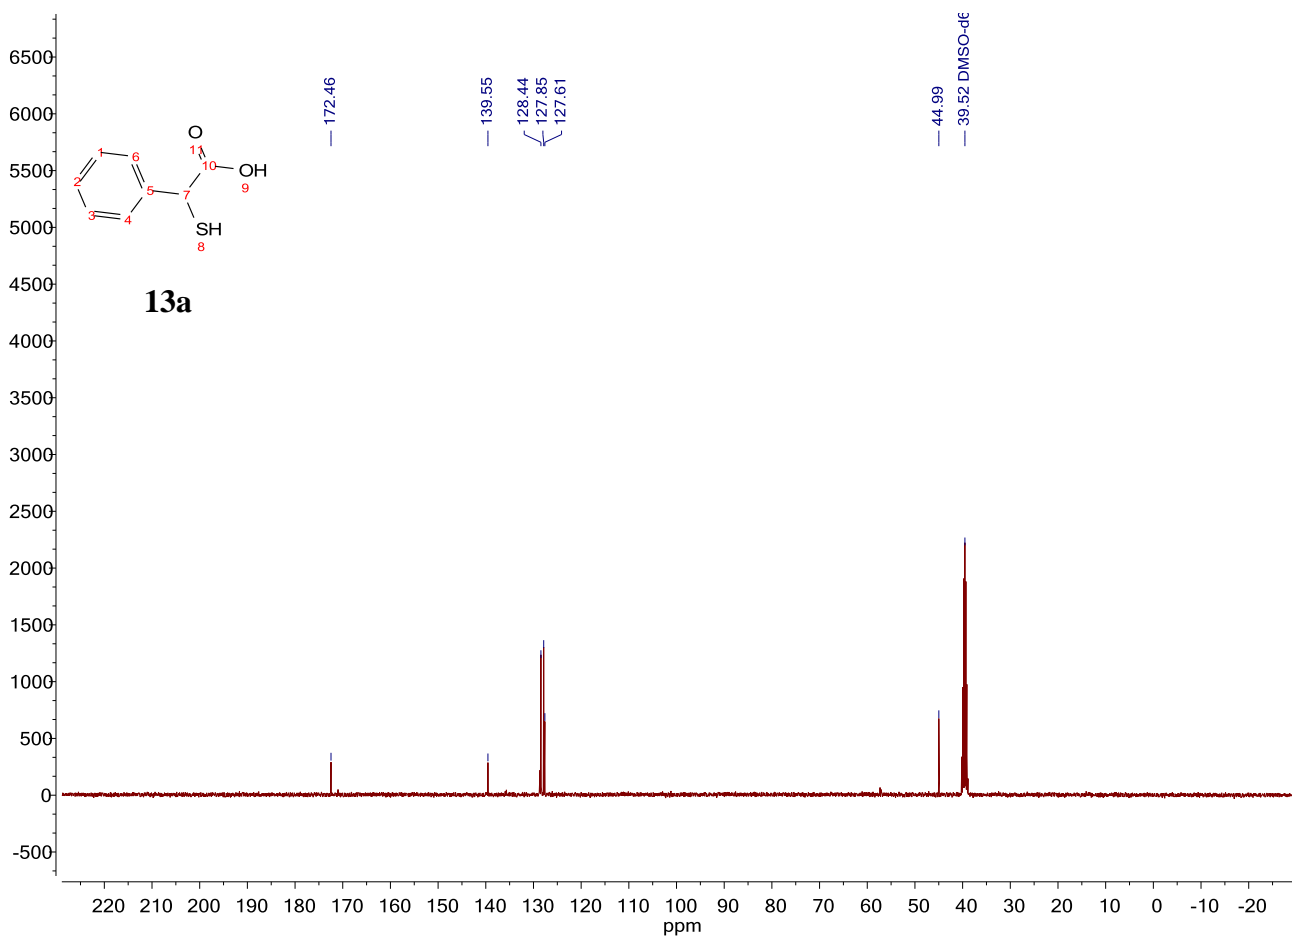

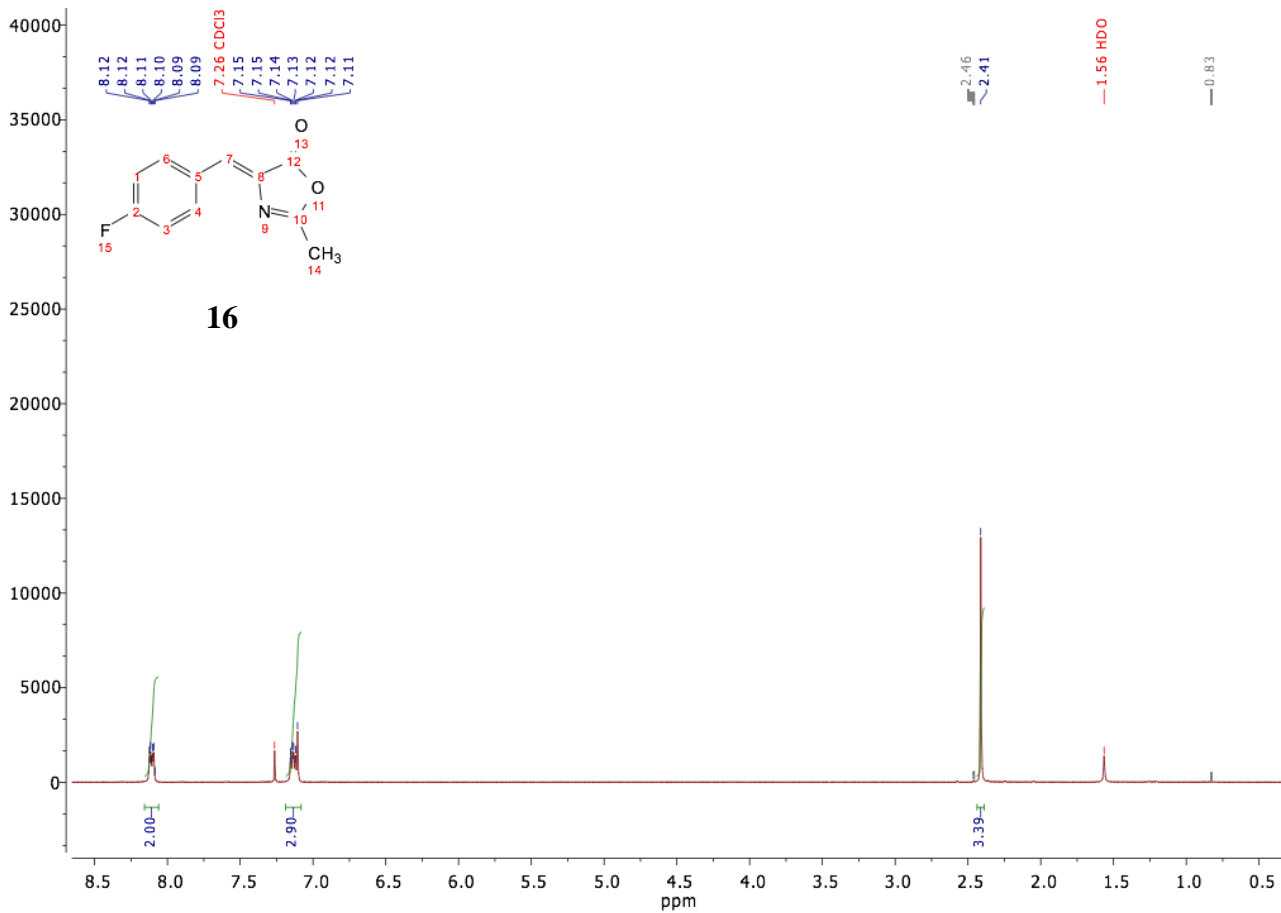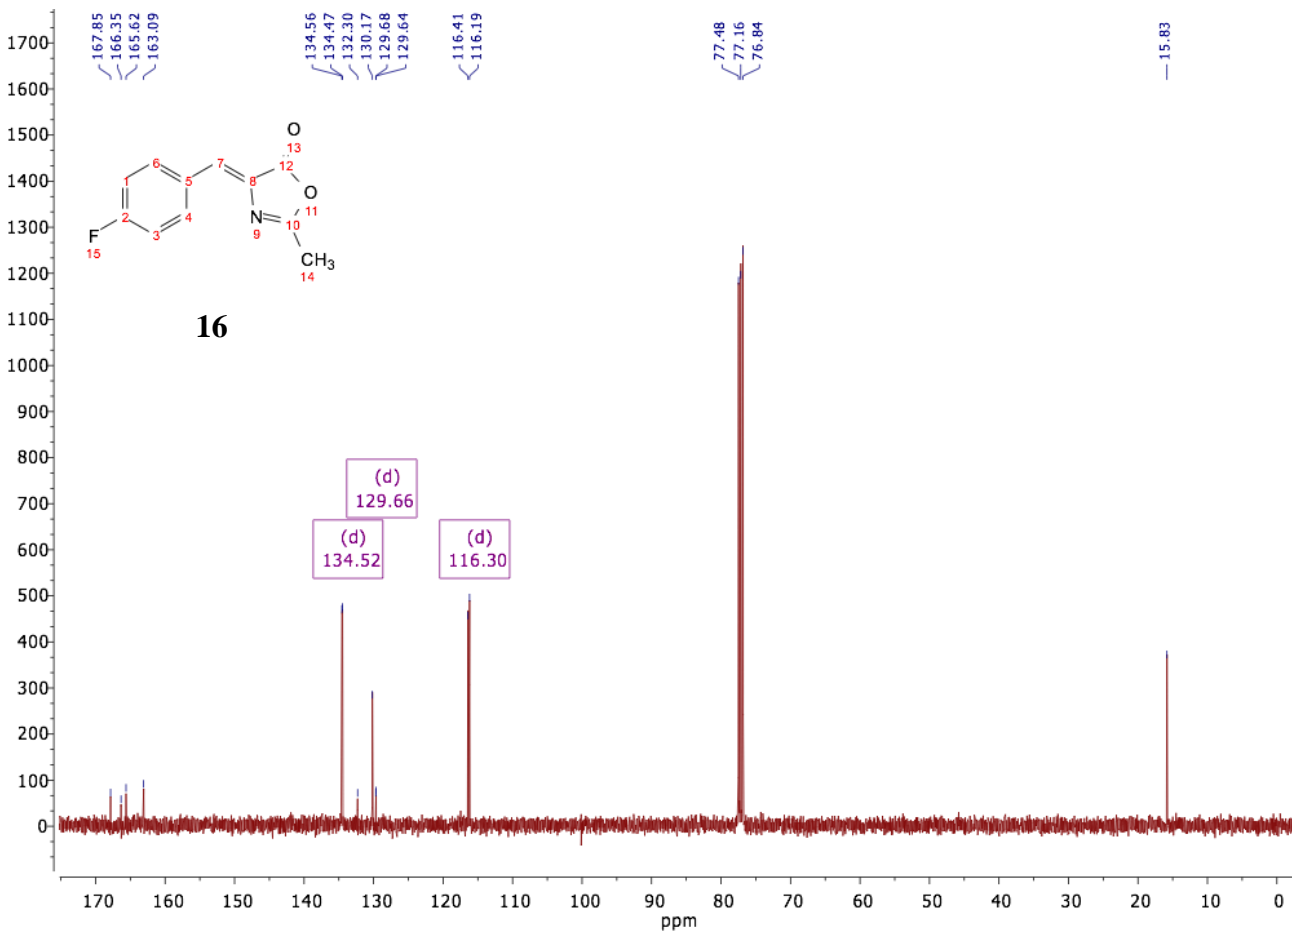

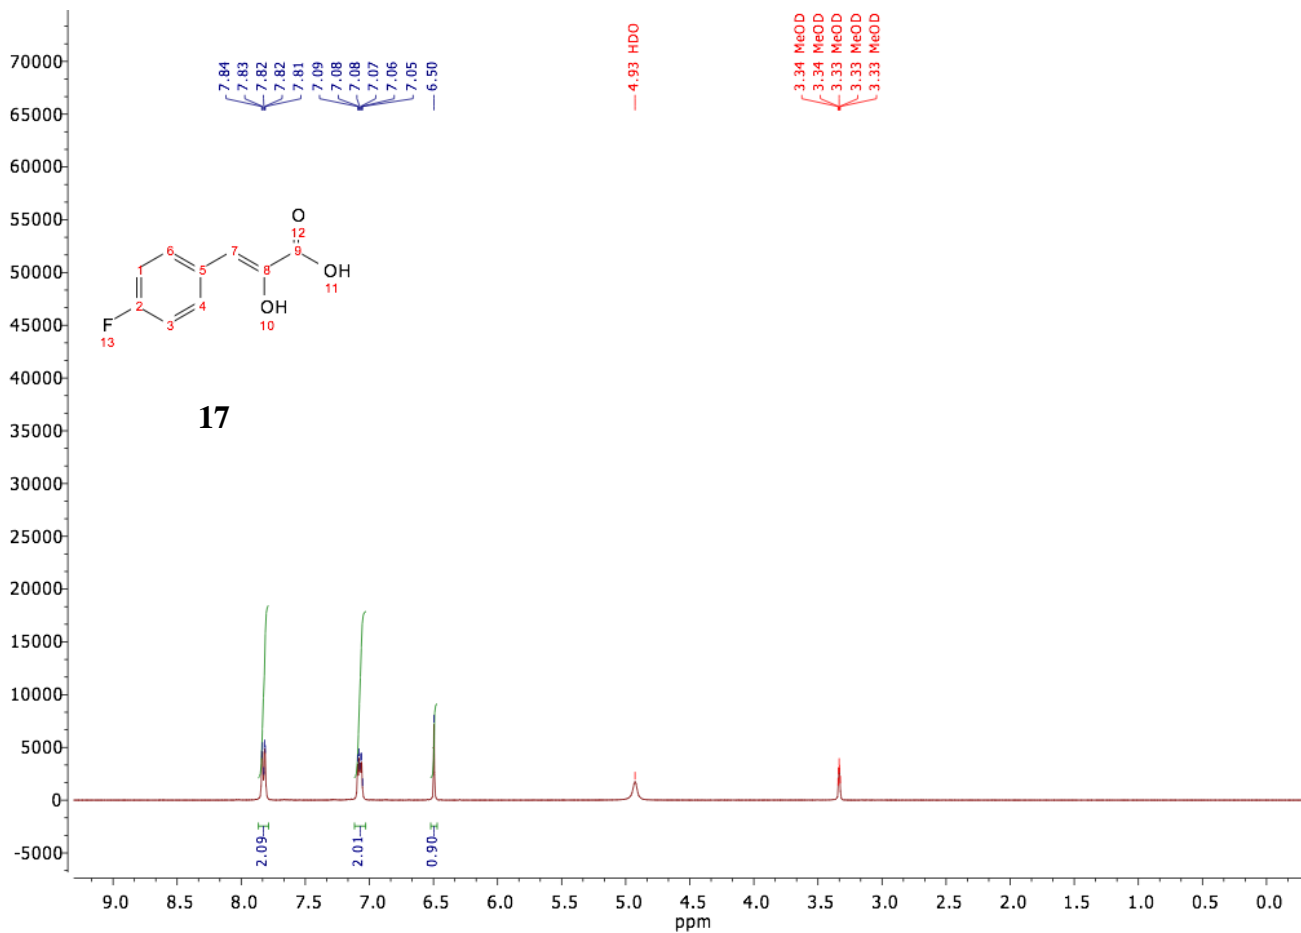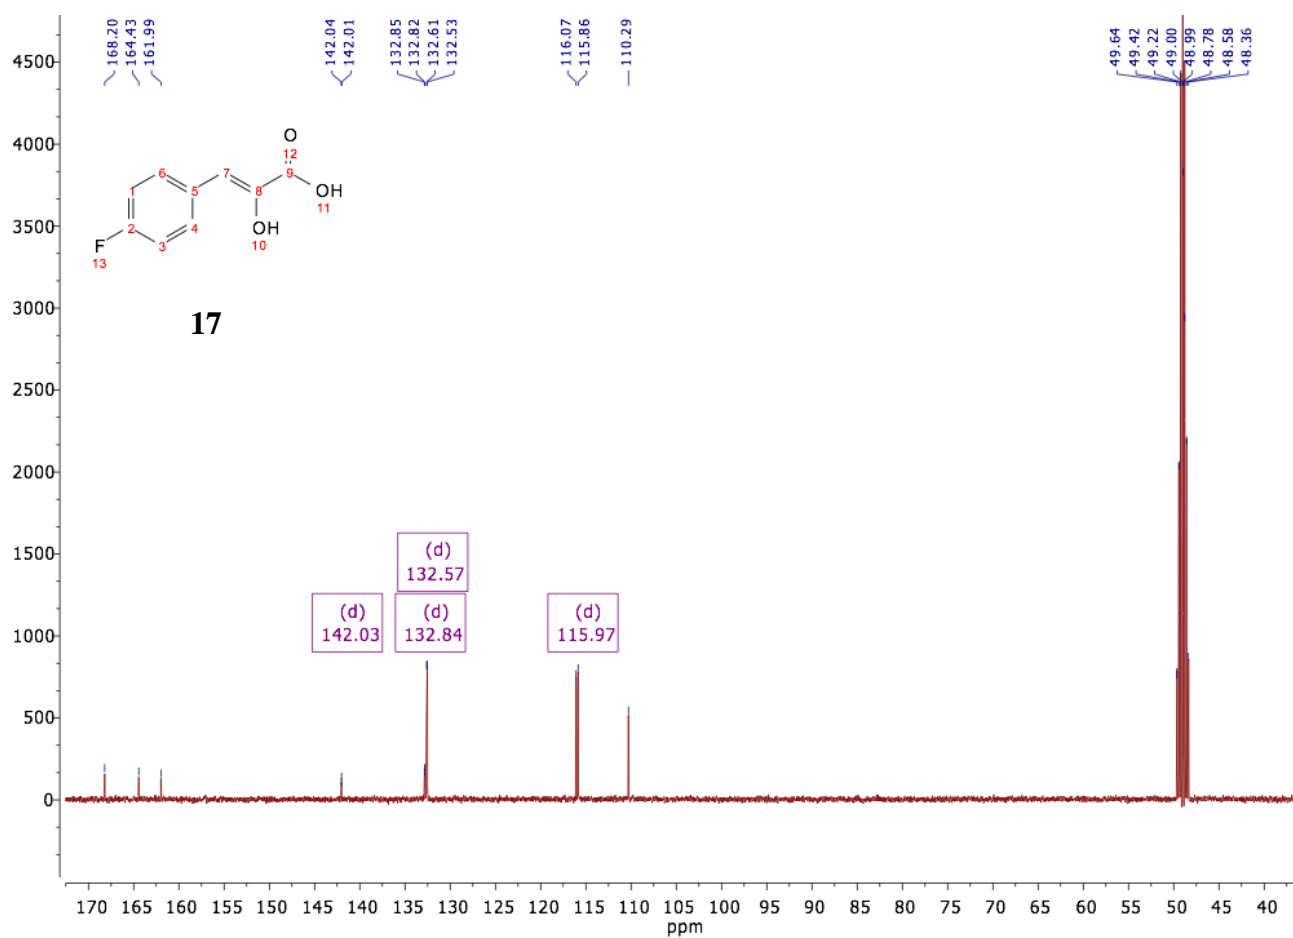

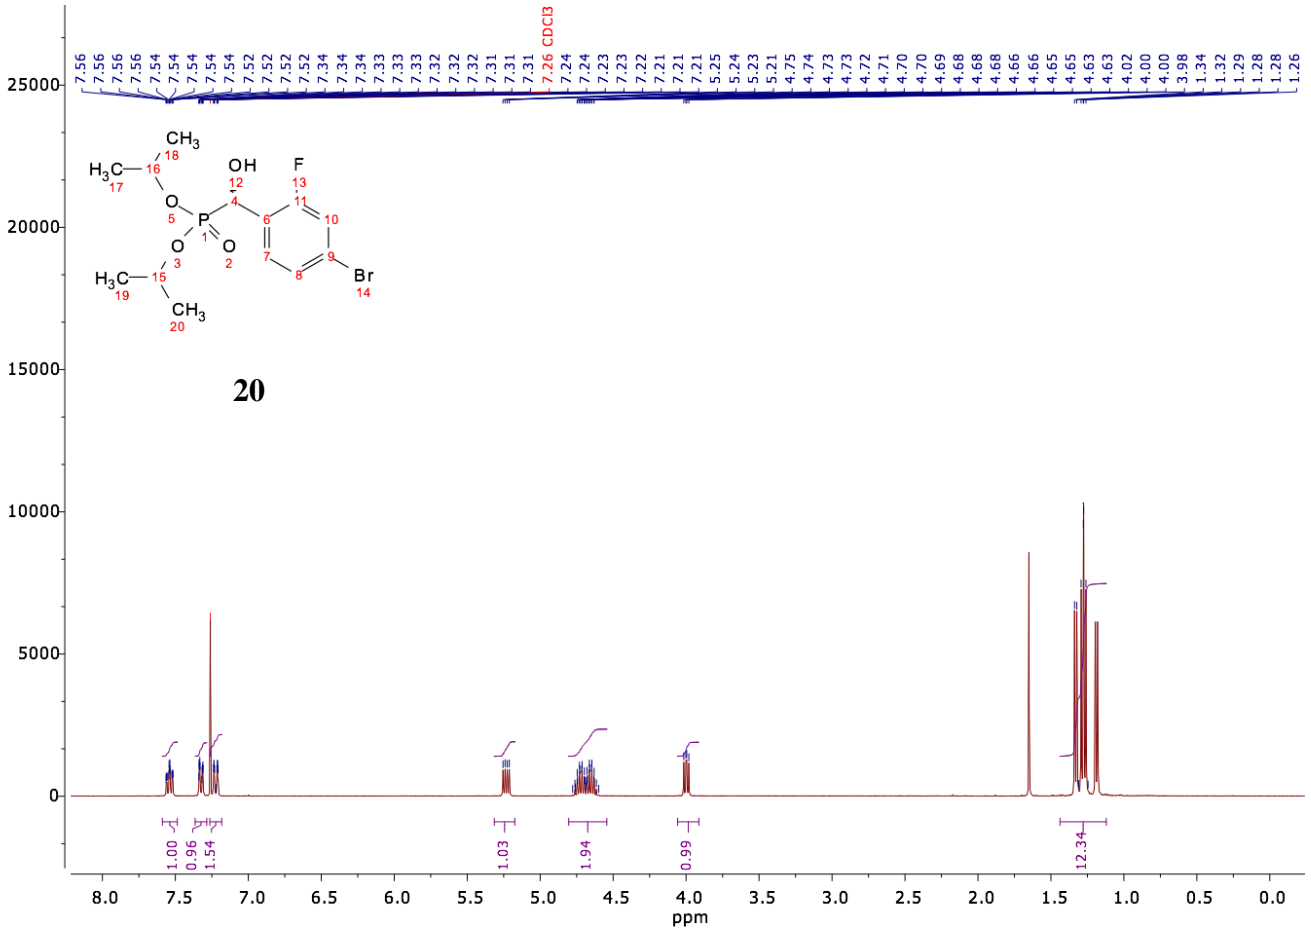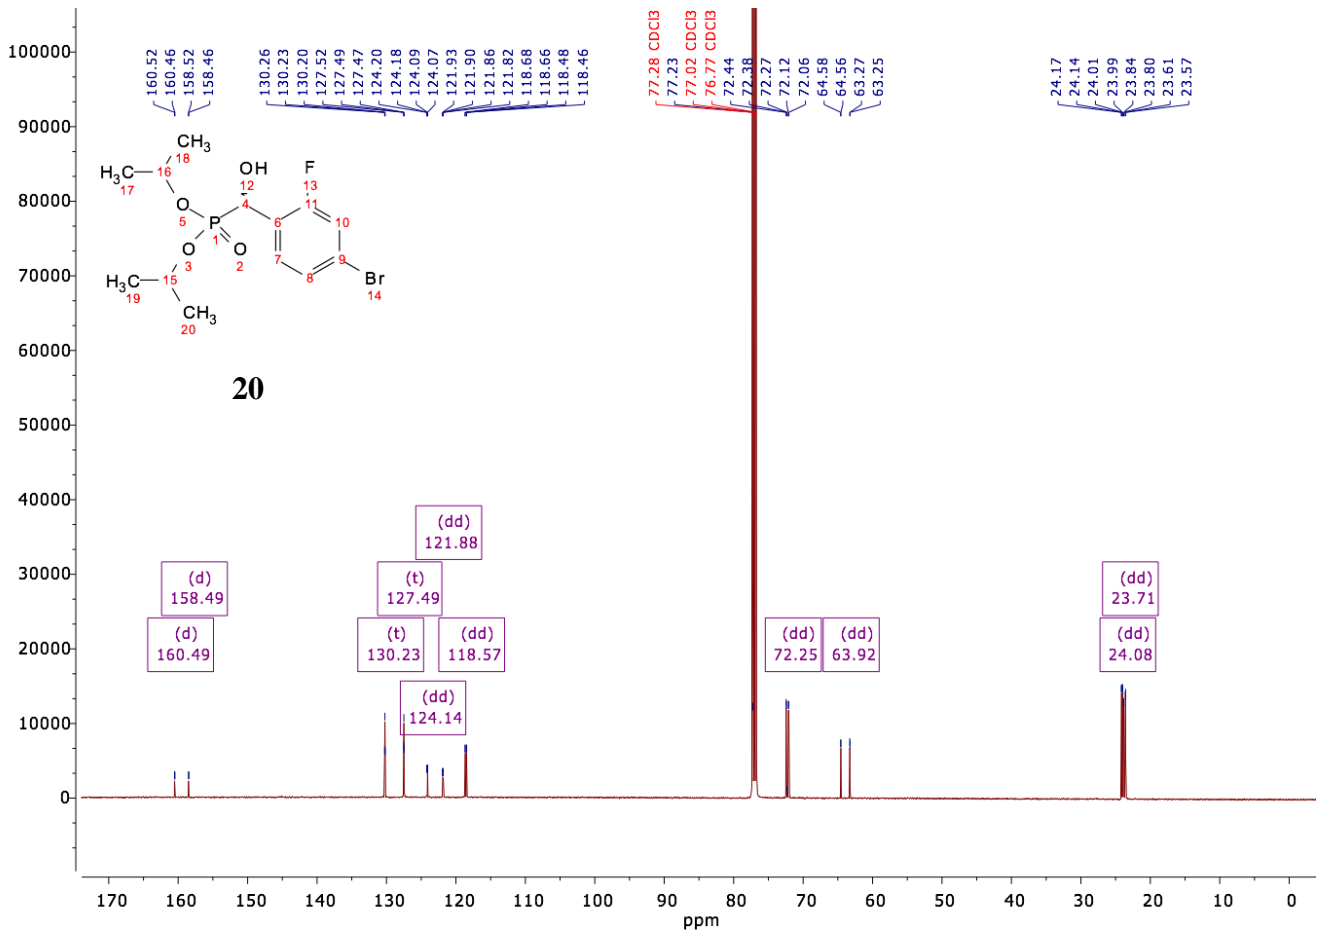

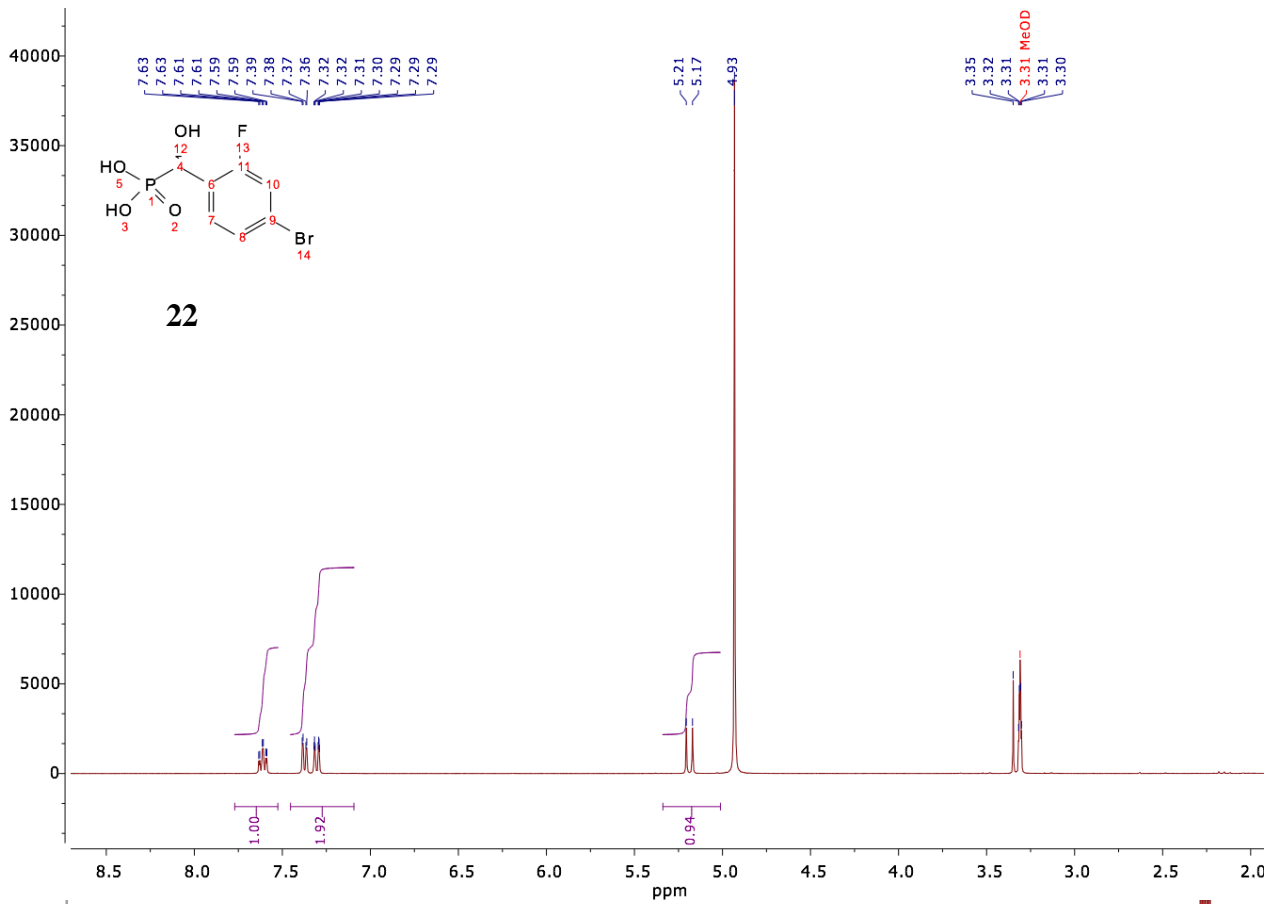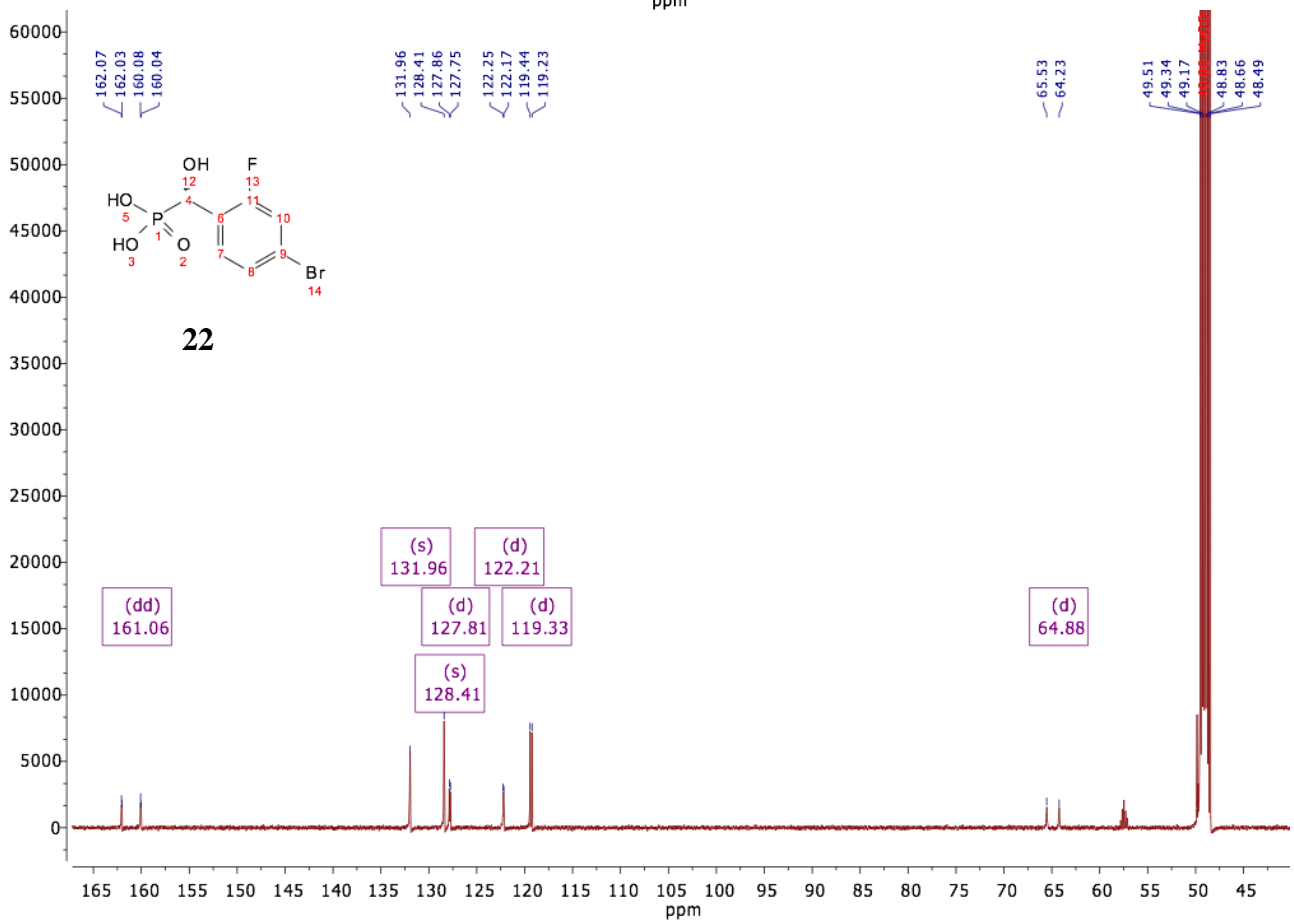

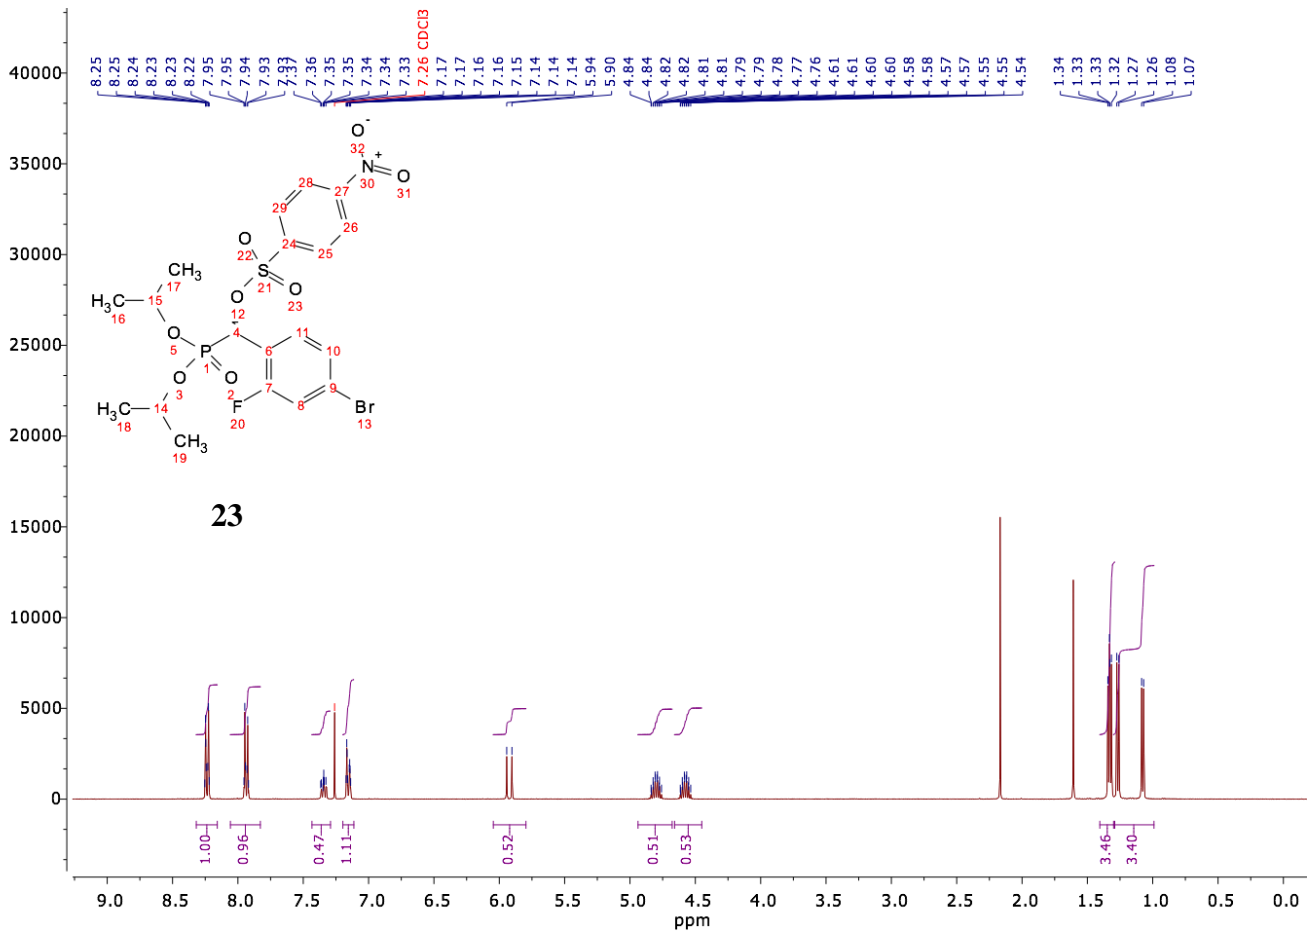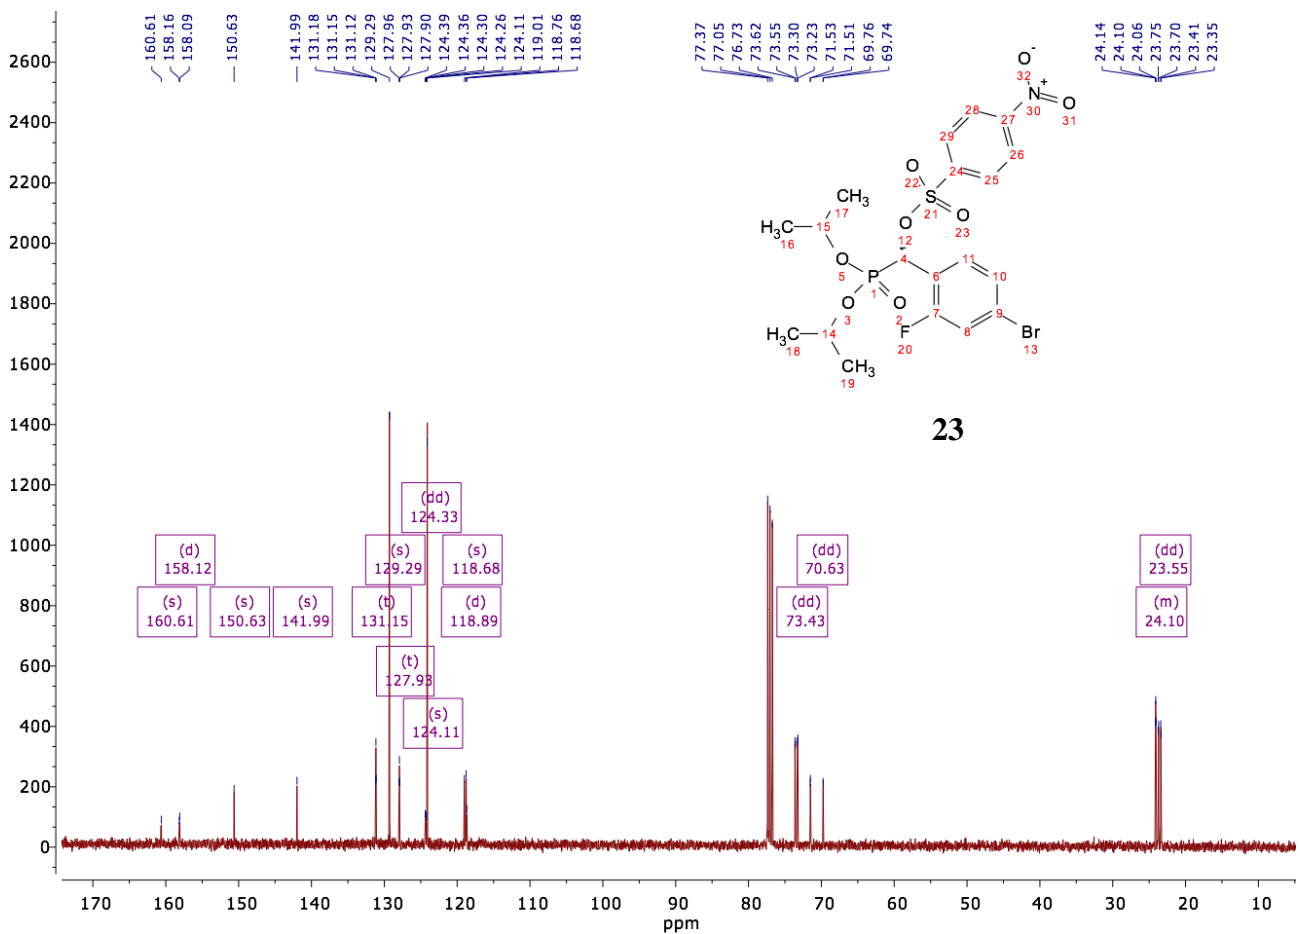



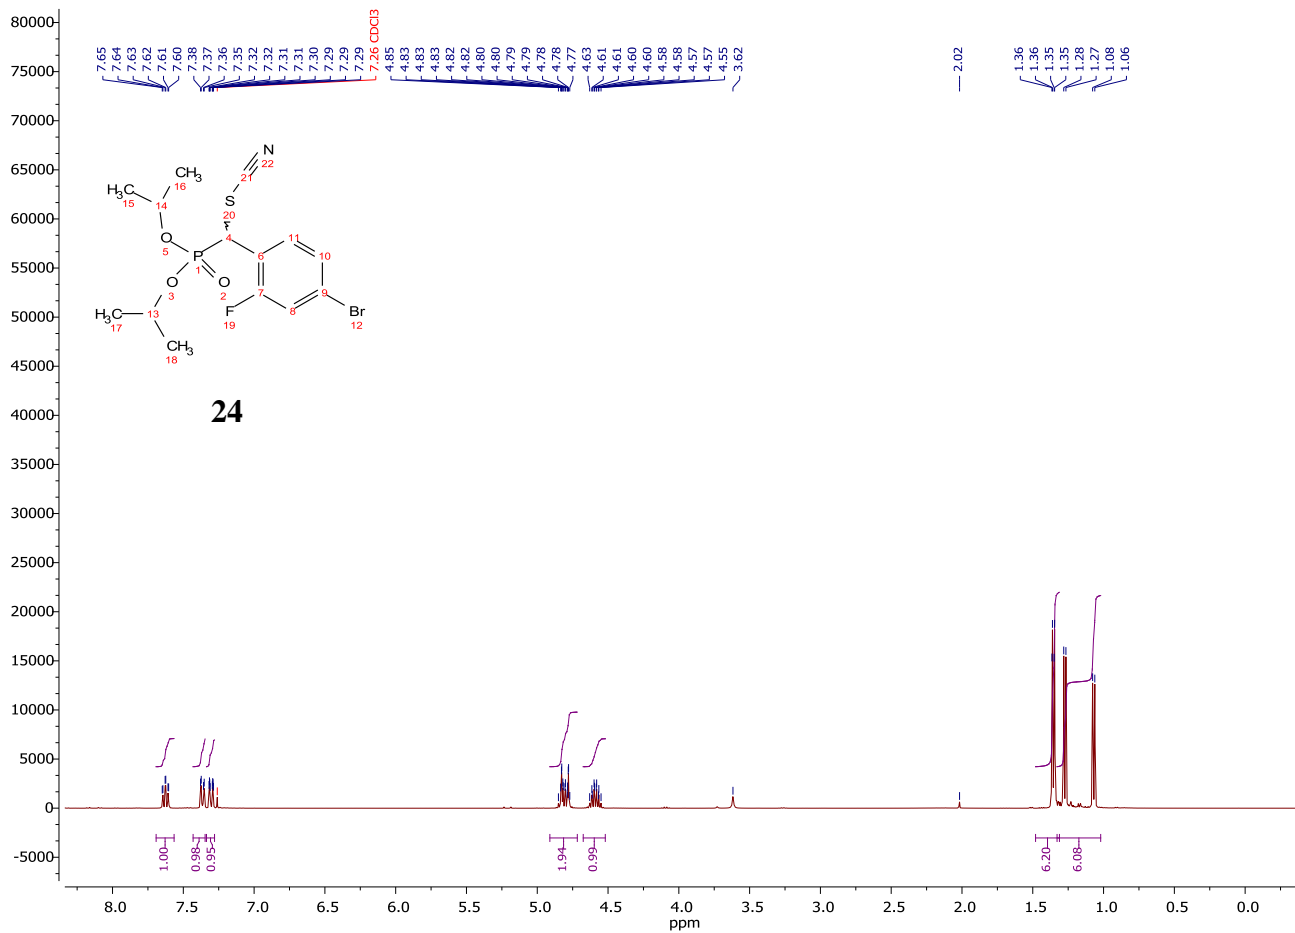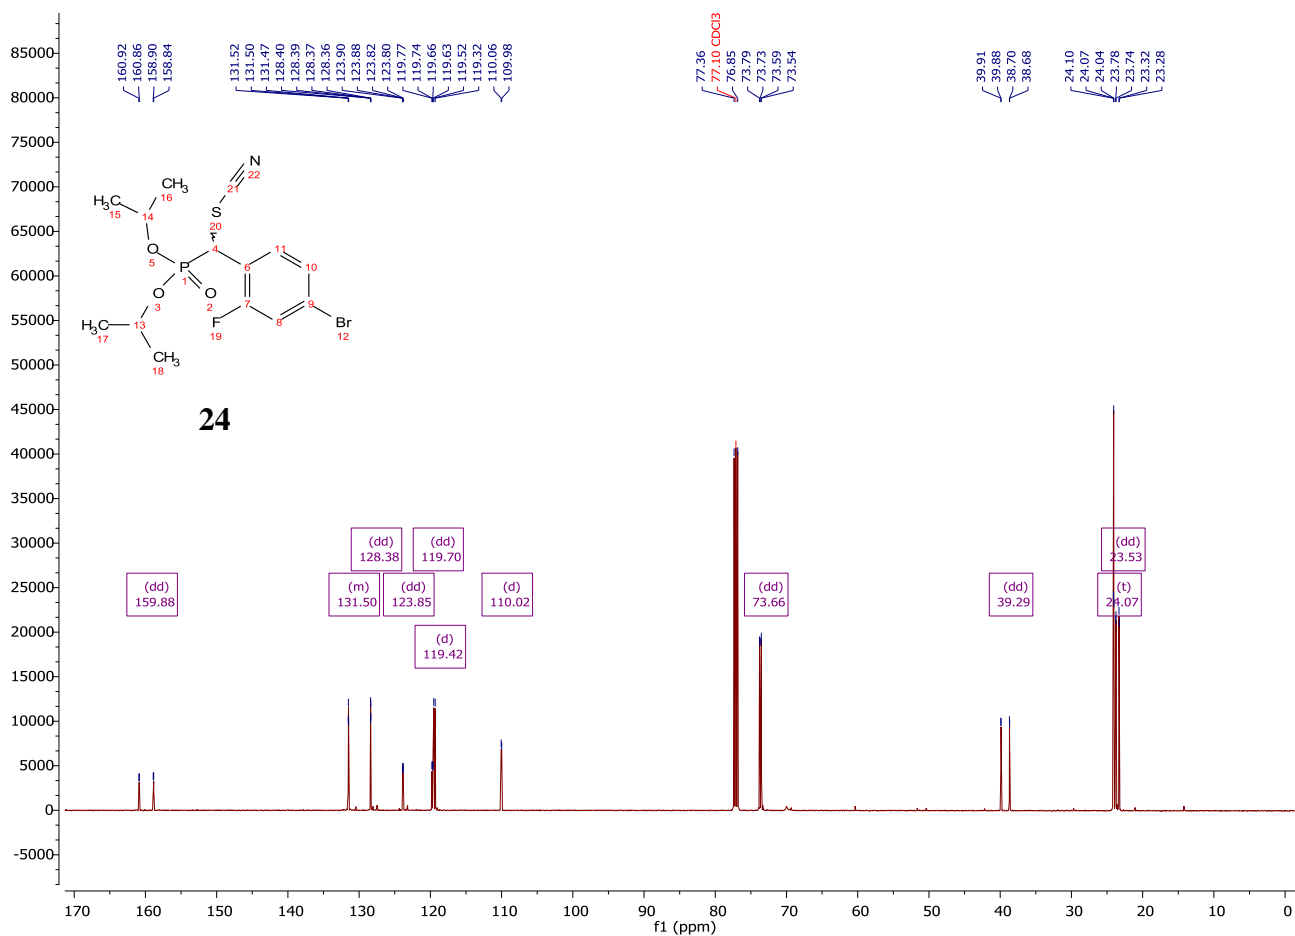

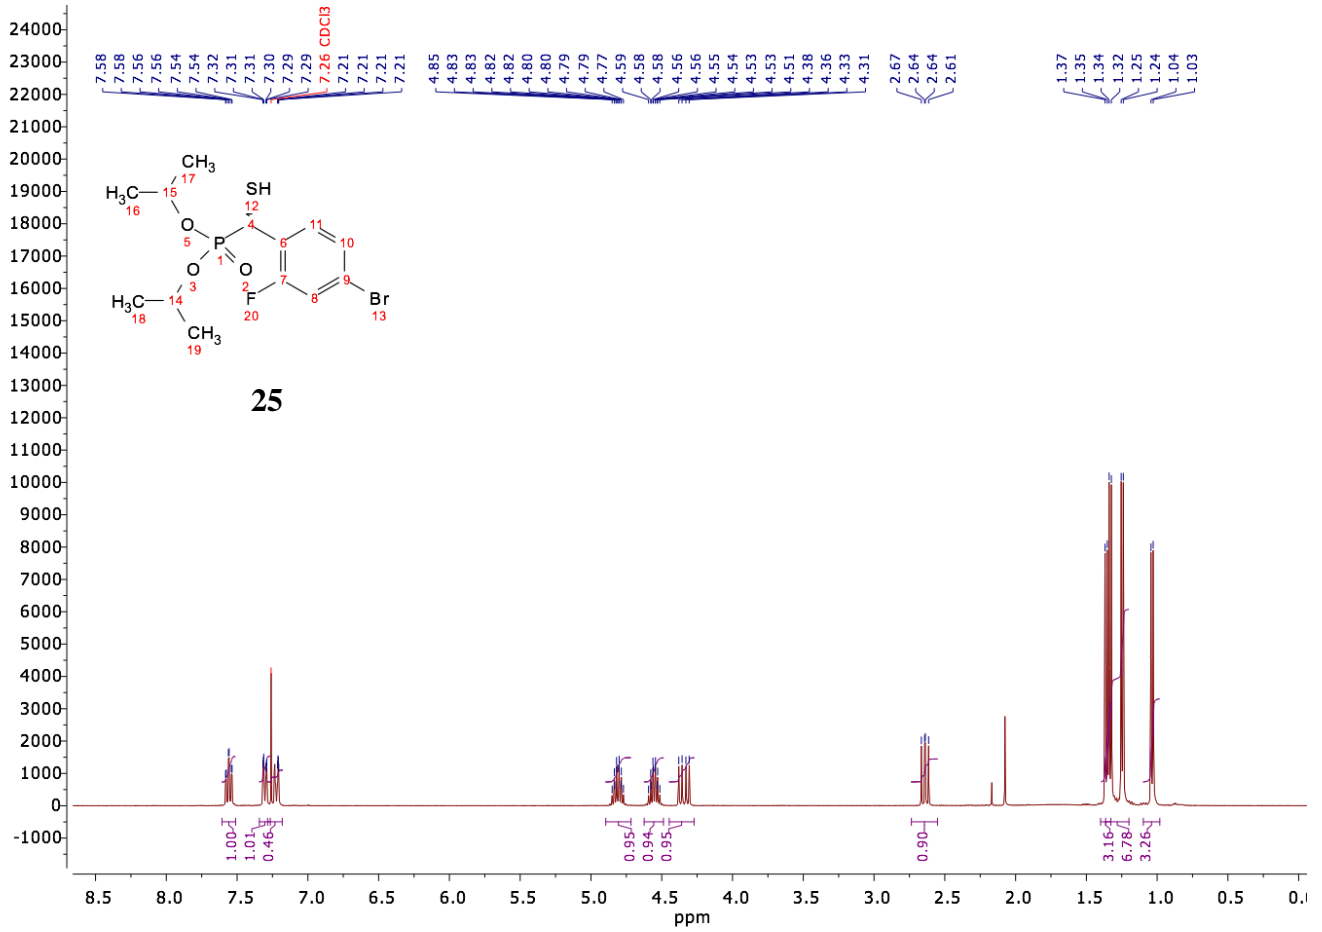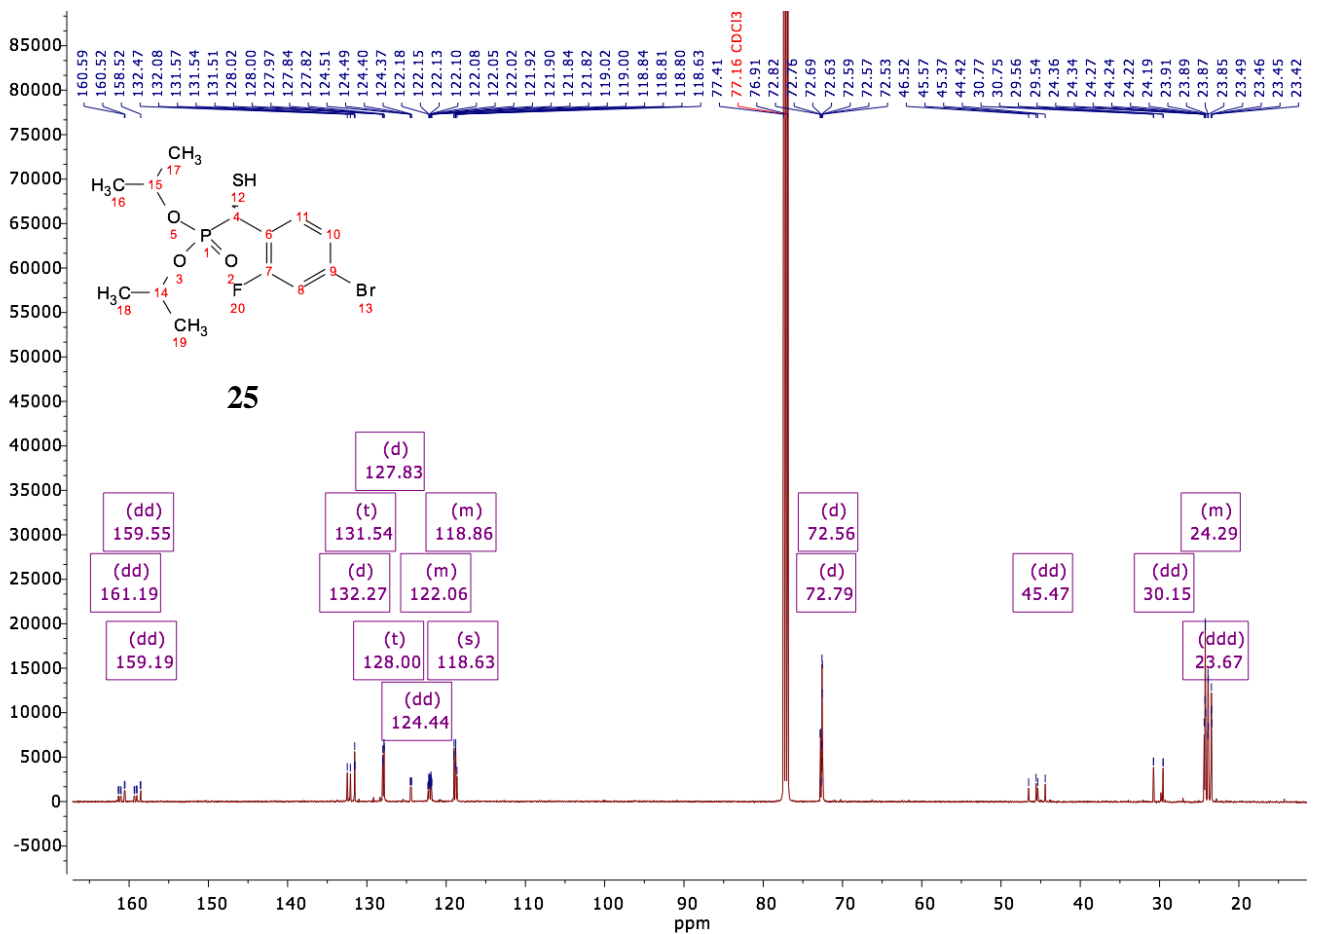

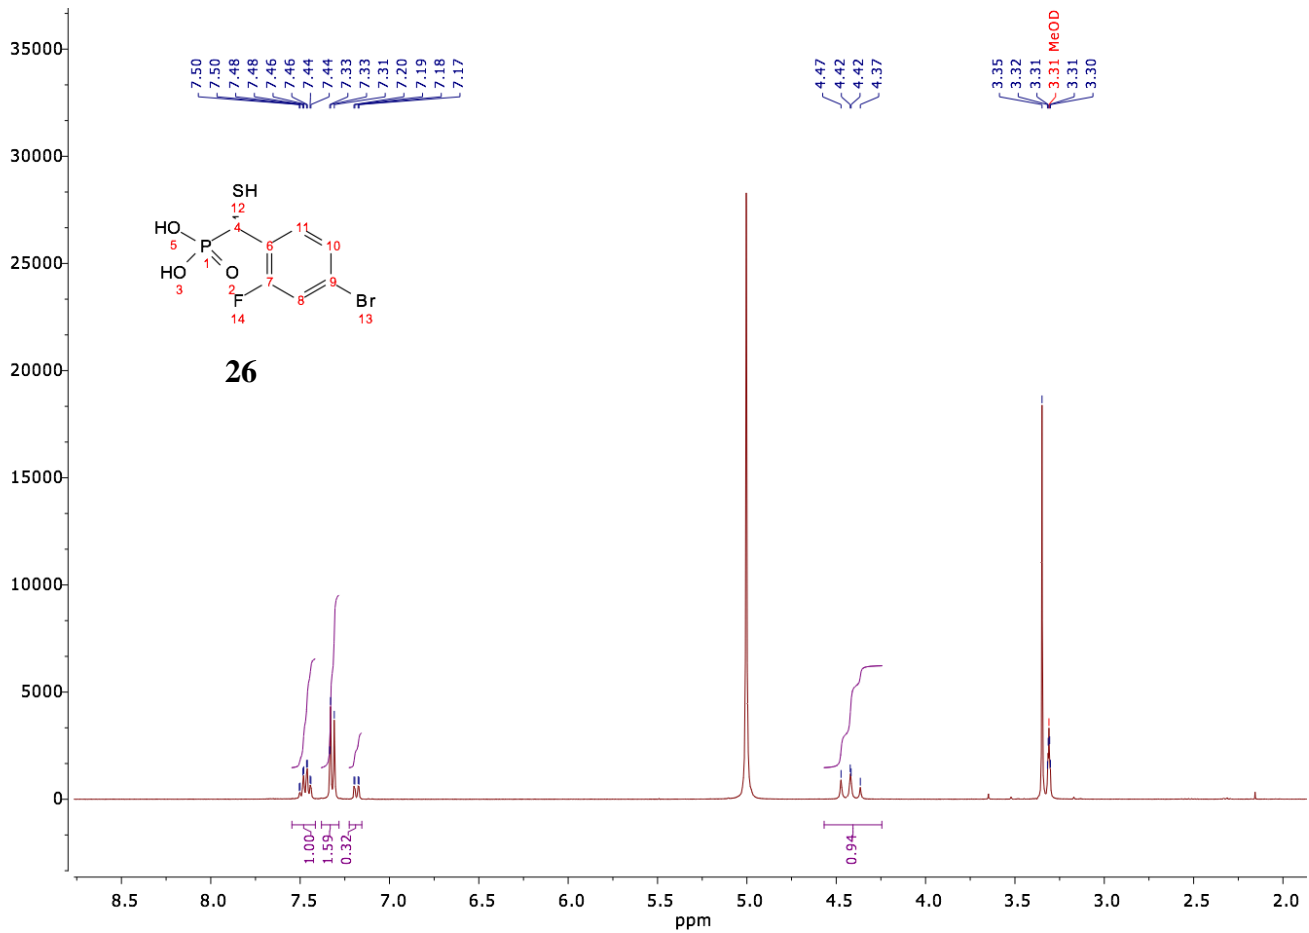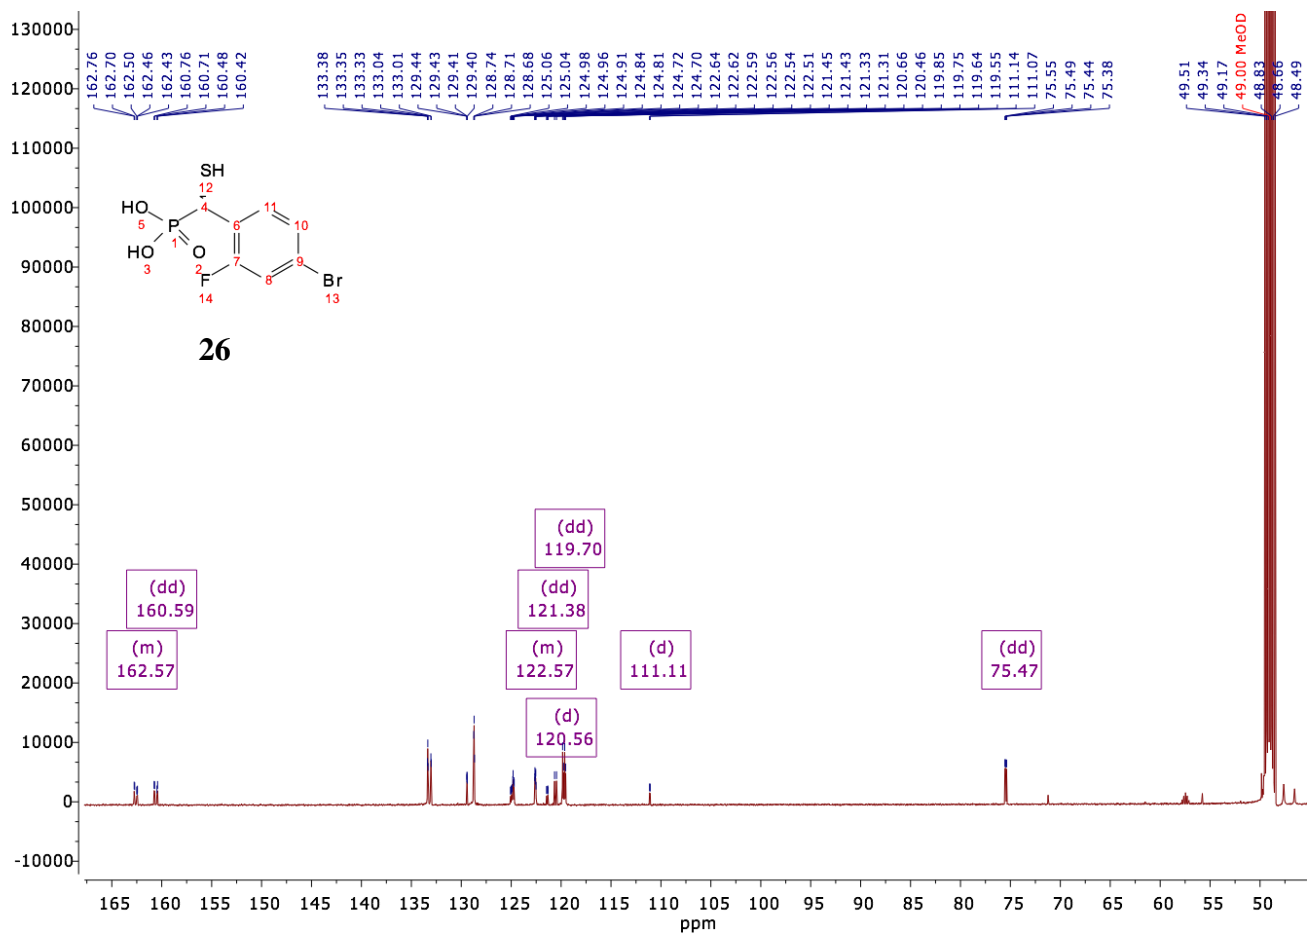

#### 4. Extended biochemical results and tables:

**Table S1.** Residual activities of metallo- $\beta$ -lactamases (MBLs) upon inhibition by selected rhodanine/thioenol derivatives at 100  $\mu$ M.

| <b>% Residual activity versus</b> |              |             |              |              |              |
|-----------------------------------|--------------|-------------|--------------|--------------|--------------|
| <b>Compound</b>                   | <b>SPM-1</b> | <b>BcII</b> | <b>IMP-1</b> | <b>VIM-2</b> | <b>NDM-1</b> |
| <b>16</b>                         | 87 $\pm$ 1   | 92 $\pm$ 2  | 100          | 100          | 97 $\pm$ 2   |
| <b>17</b>                         | 93 $\pm$ 2   | 90 $\pm$ 3  | 100          | 100          | 97 $\pm$ 4   |
| <b>22</b>                         | 92 $\pm$ 5   | 98 $\pm$ 2  | 100          | 100          | 100          |
| <b>26</b>                         | 95 $\pm$ 6   | 100         | 100          | 100          | 96 $\pm$ 3   |

BcII, *Bacillus cereus* II MBL; IMP-1, Imipenemase MBL-1; NDM-1, New Delhi MBL-1; SPM-1, São Paulo MBL-1; VIM-2, Verona integron-encoded MBL-2

**Figure S1.** Residual activities of serine- $\beta$ -lactamases (SBLs) upon inhibition by rhodanines and enethiols at 200 $\mu$ M.

### Inhibition of intact rhodanine on a panel of SBLs

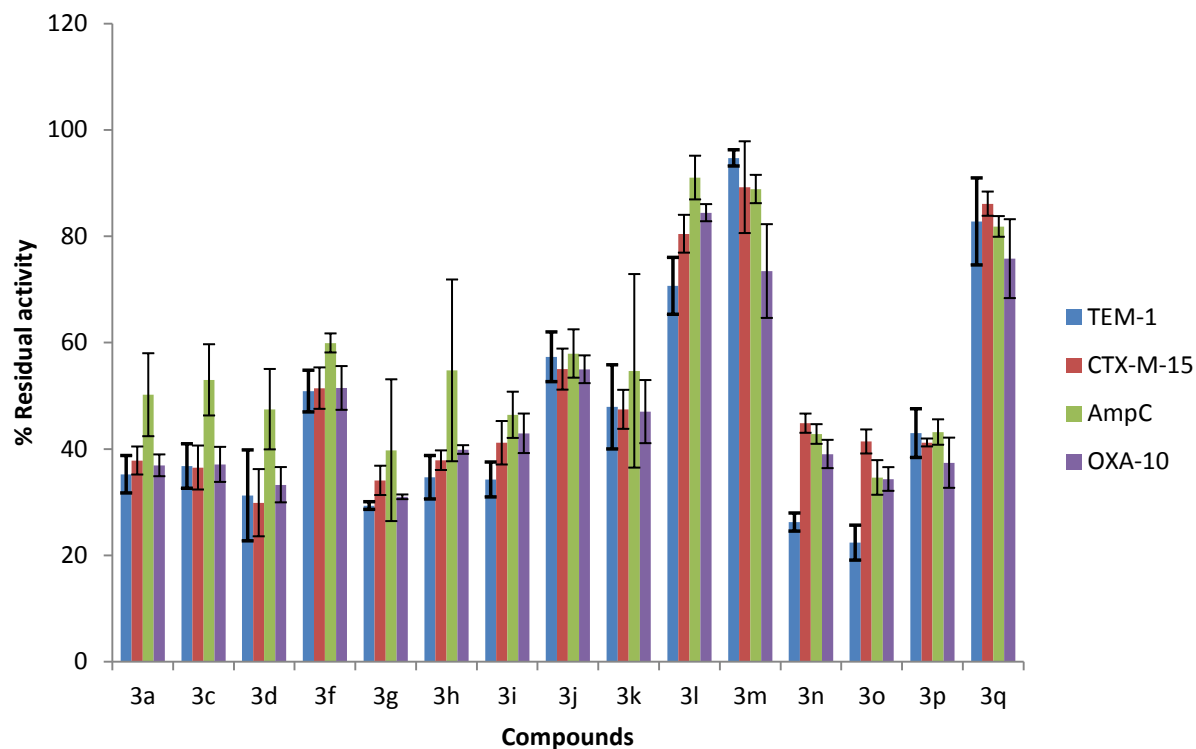

### Inhibition of intact rhodanine amide on a panel of SBLs

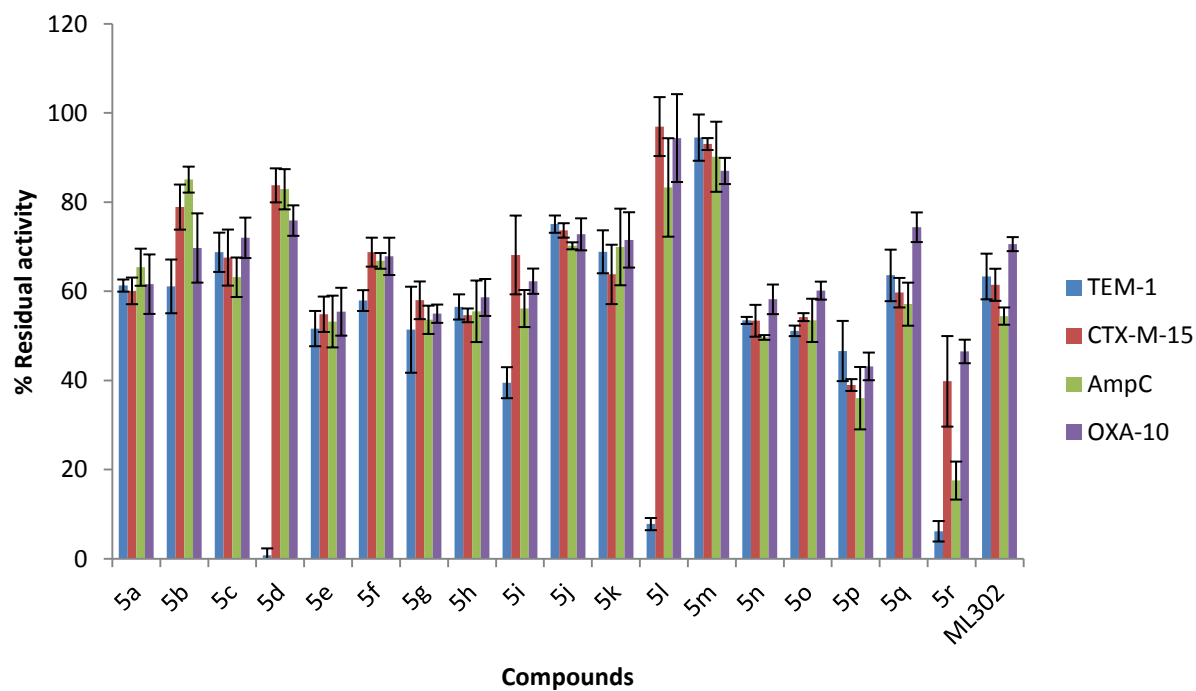

## Inhibition of enethiols on a panel of SBLs

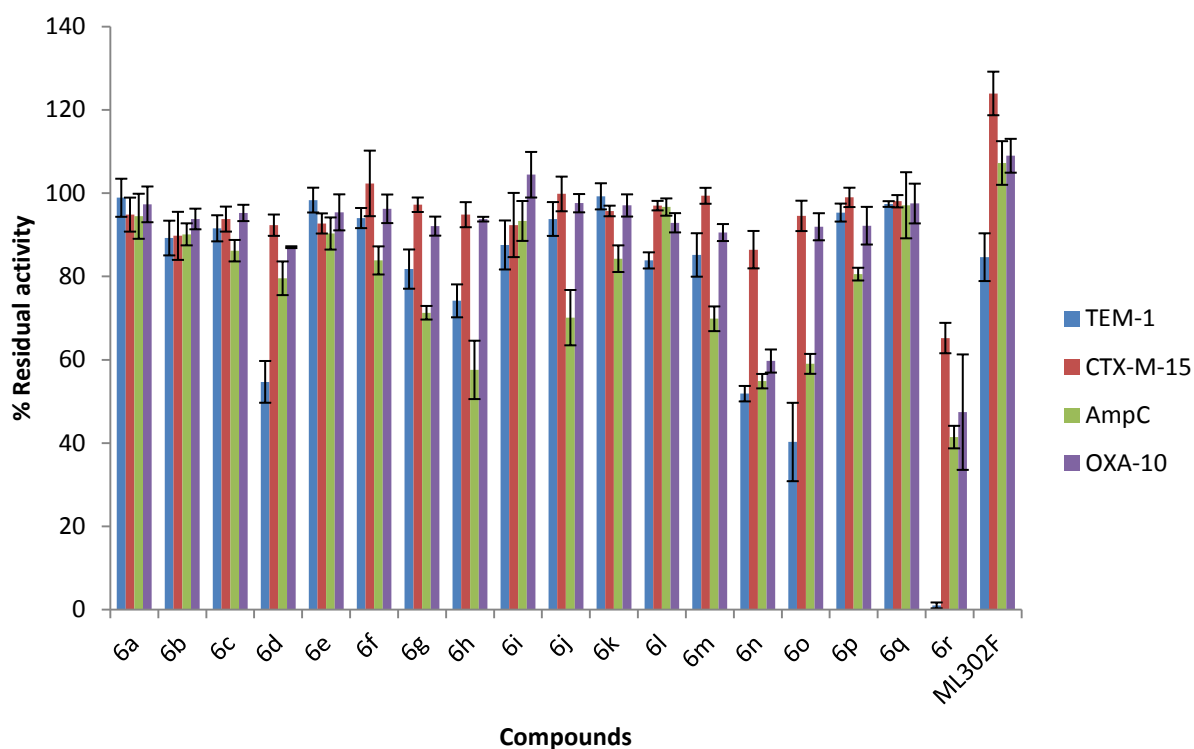

## Inhibition of hydroxy and phosphate inhibitors on a panel of SBLs

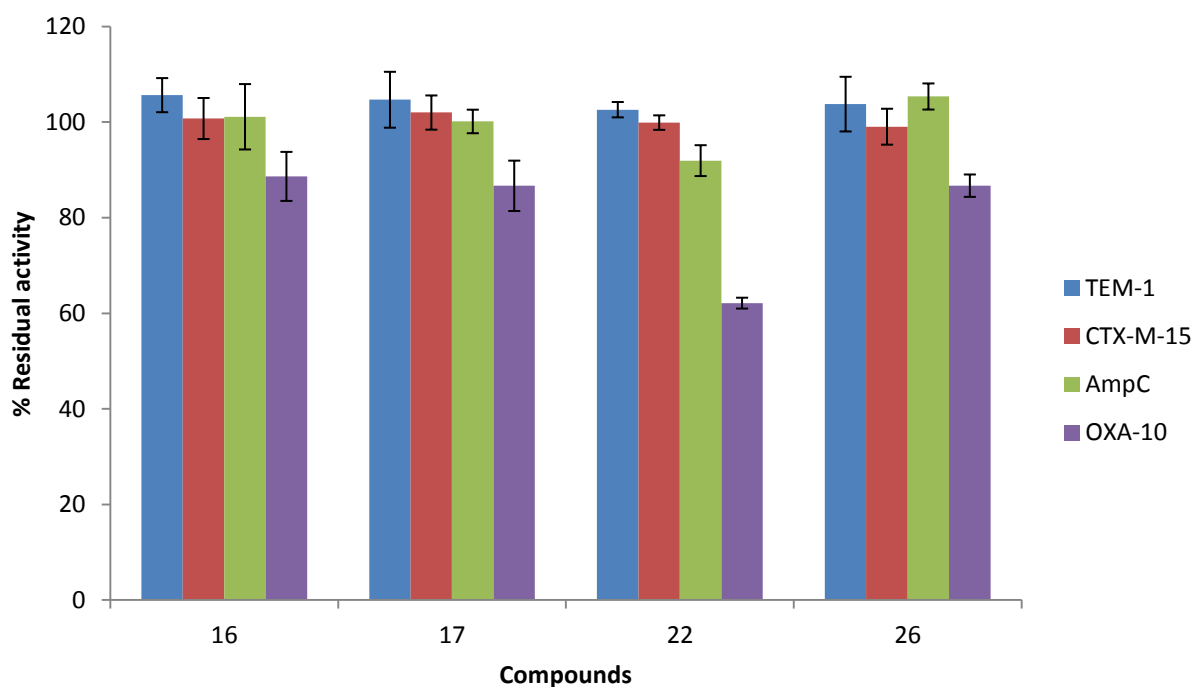

AmpC, Ampicillin resistant  $\beta$ -lactamase class C; CTX-M-15, Cefotaxime hydrolysing  $\beta$ -lactamase from Munich 15; OXA-10, Oxacillinase-10; TEM-1, Temoneira  $\beta$ -lactamase-1

**Figure S2:** IC<sub>50</sub> curves for BcII inhibition time courses. Residual activities were calculated from the initial rate of FC5 hydrolysis after incubation of the enzyme with the inhibitor for 10 minutes.

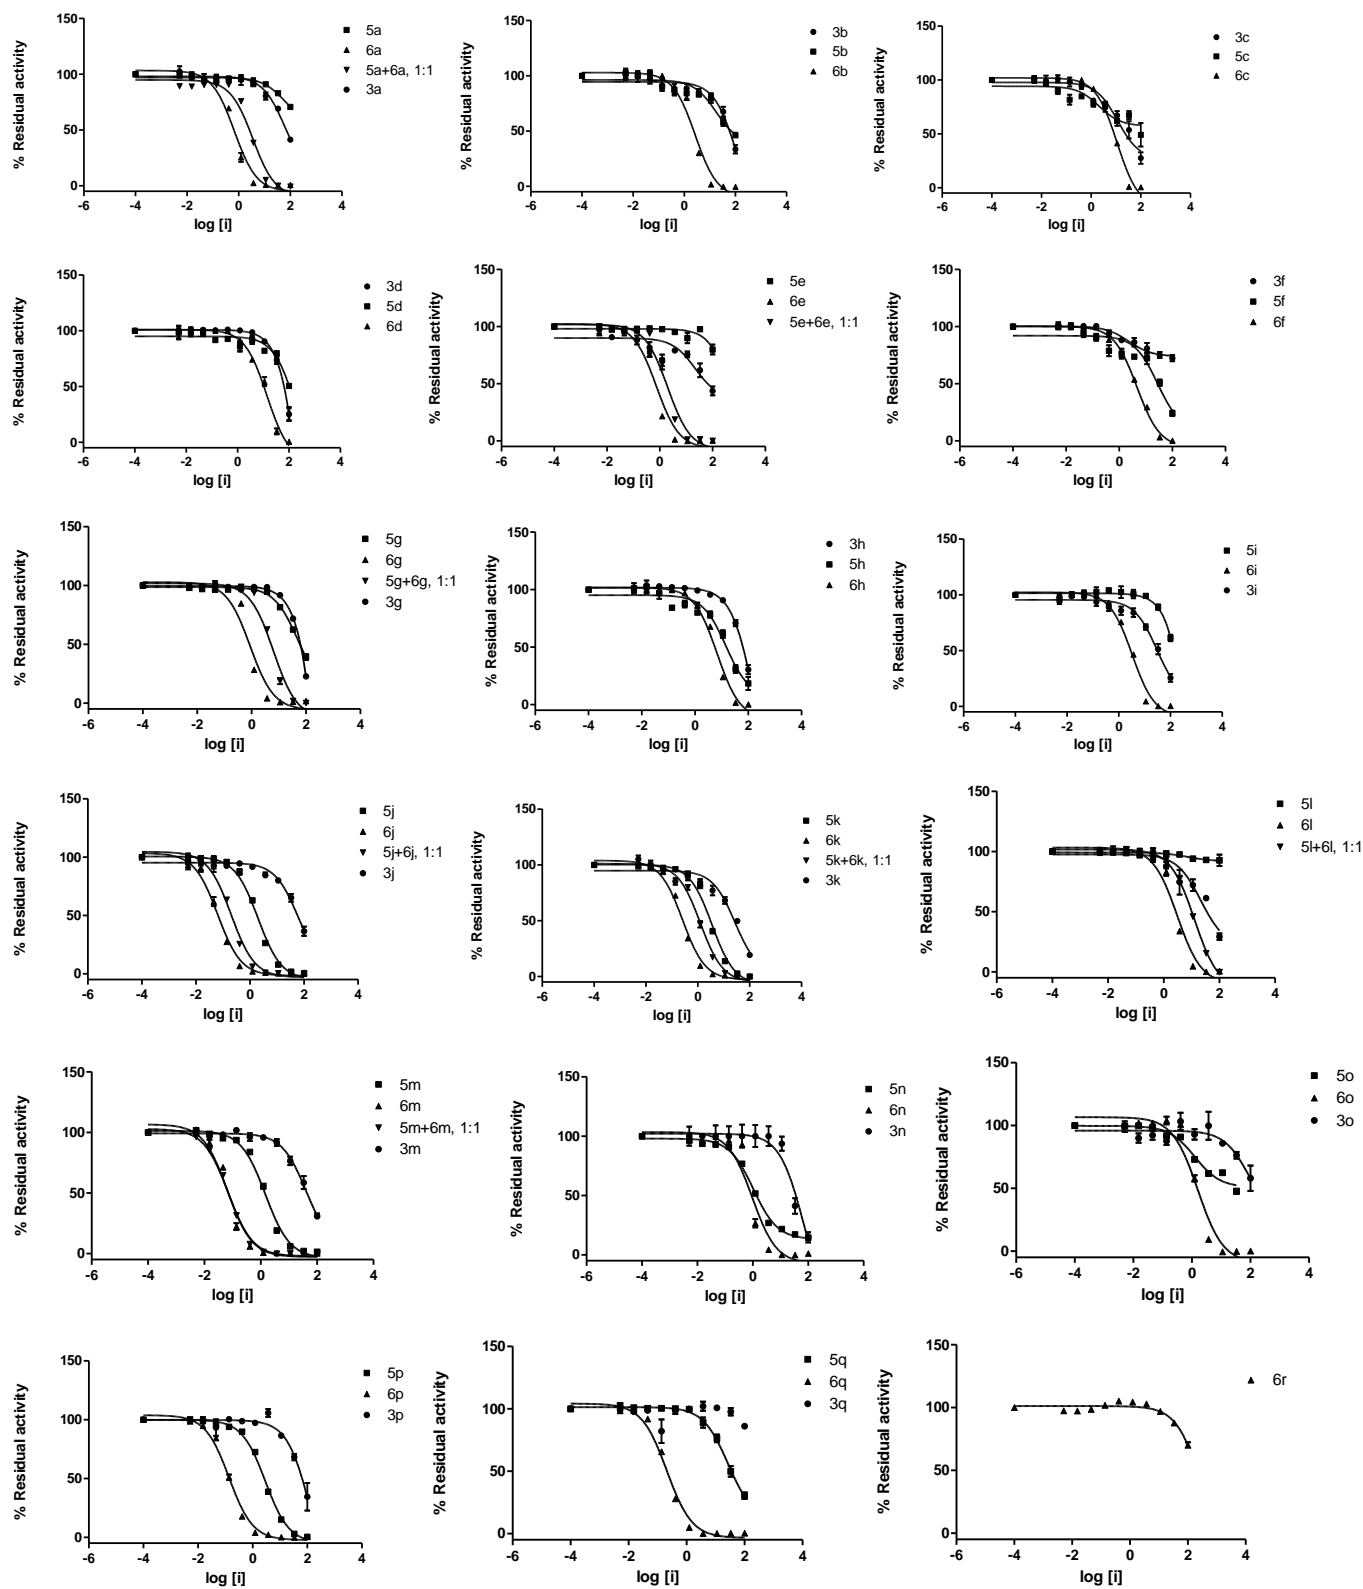

Figure S2 continued

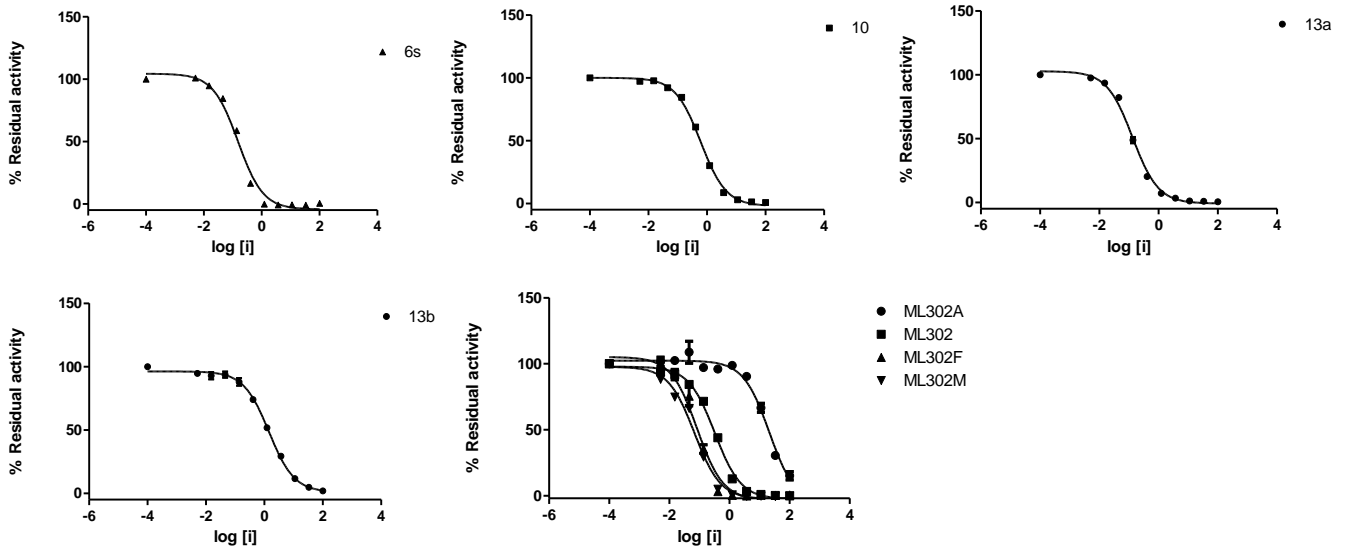



**Figure S3:** IC<sub>50</sub> curves for IMP-1 inhibition time courses. Residual activities were calculated from the initial rate of FC5 hydrolysis after incubation of the enzyme with the inhibitor for 10 minutes.

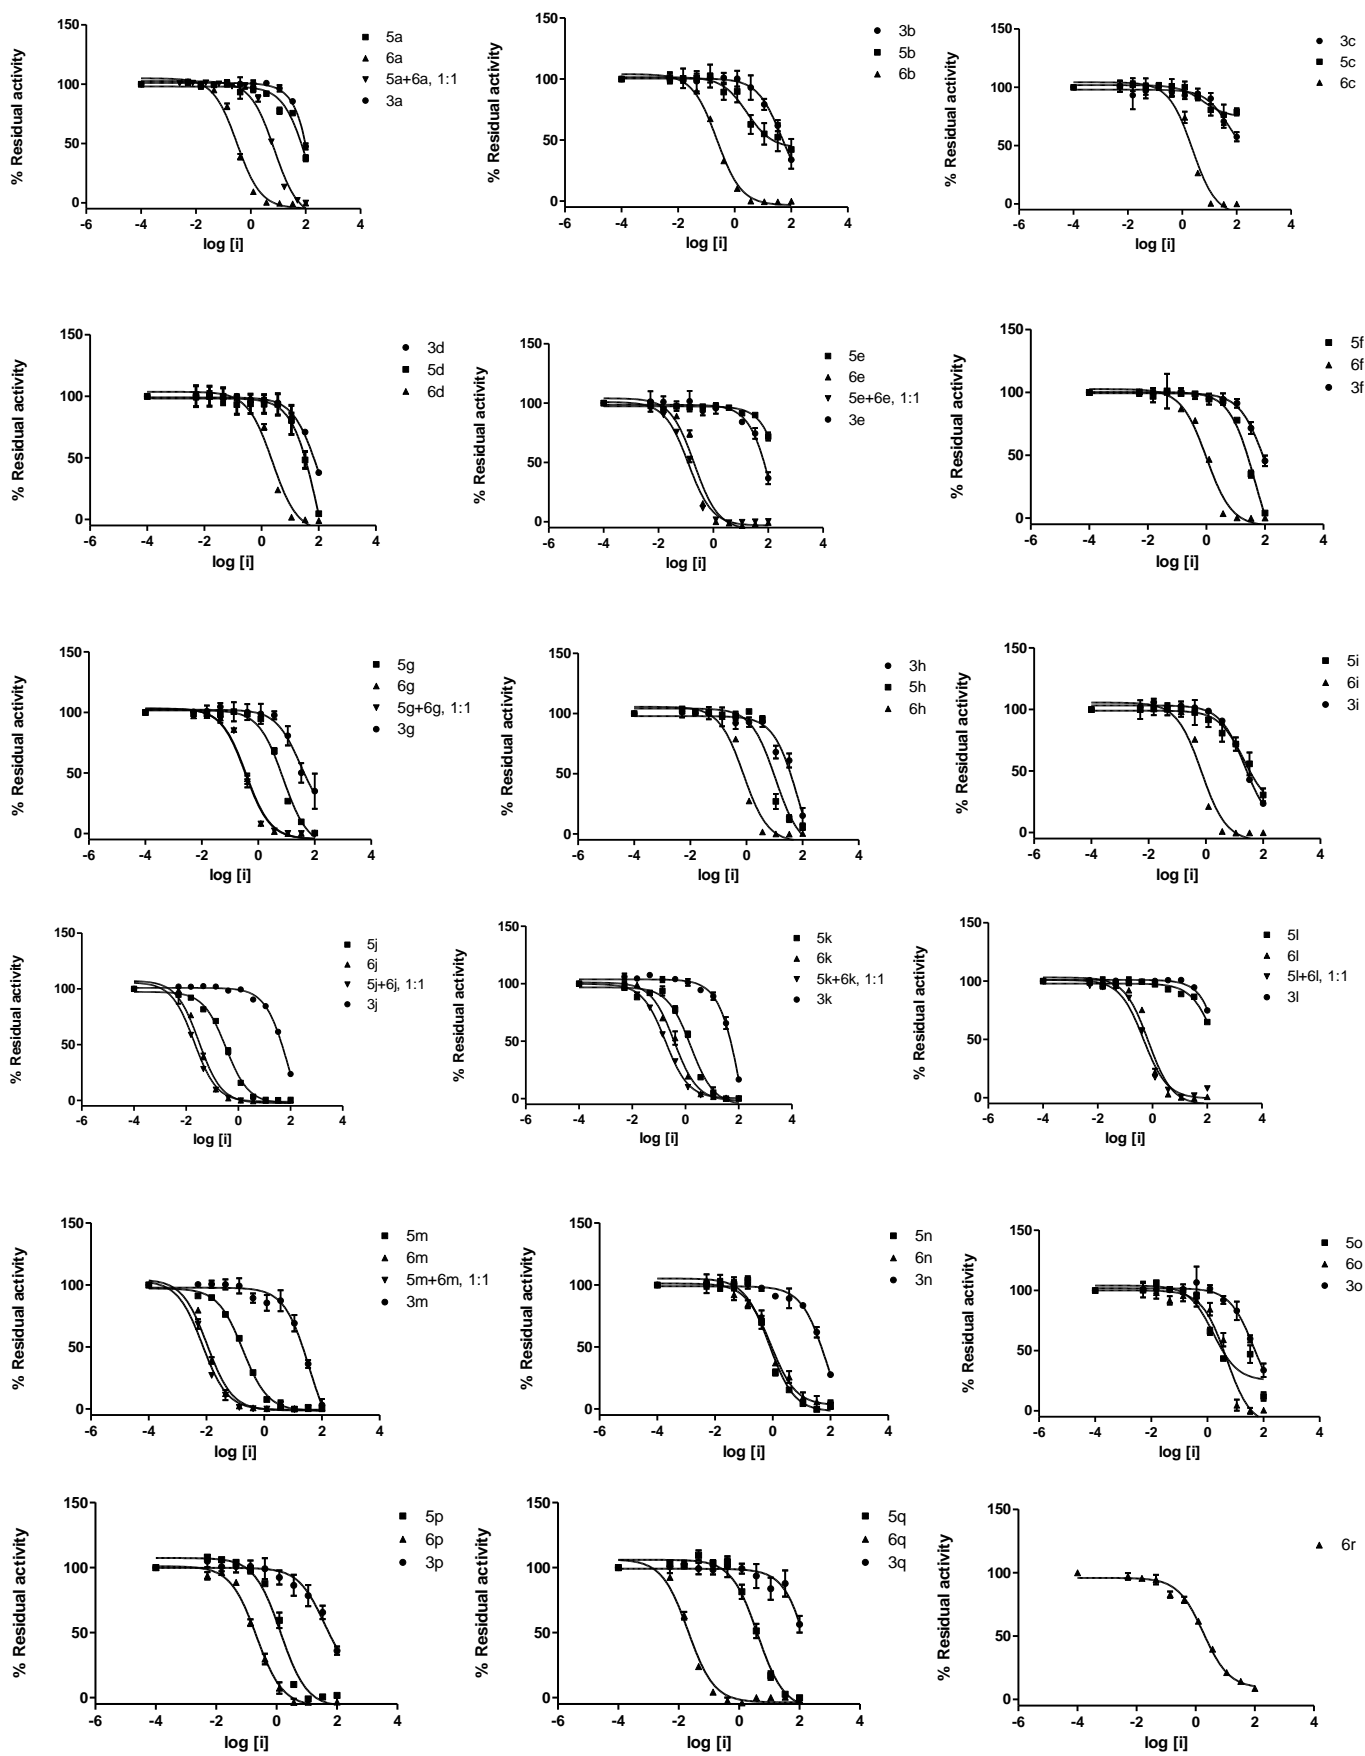

Figure S3 continued

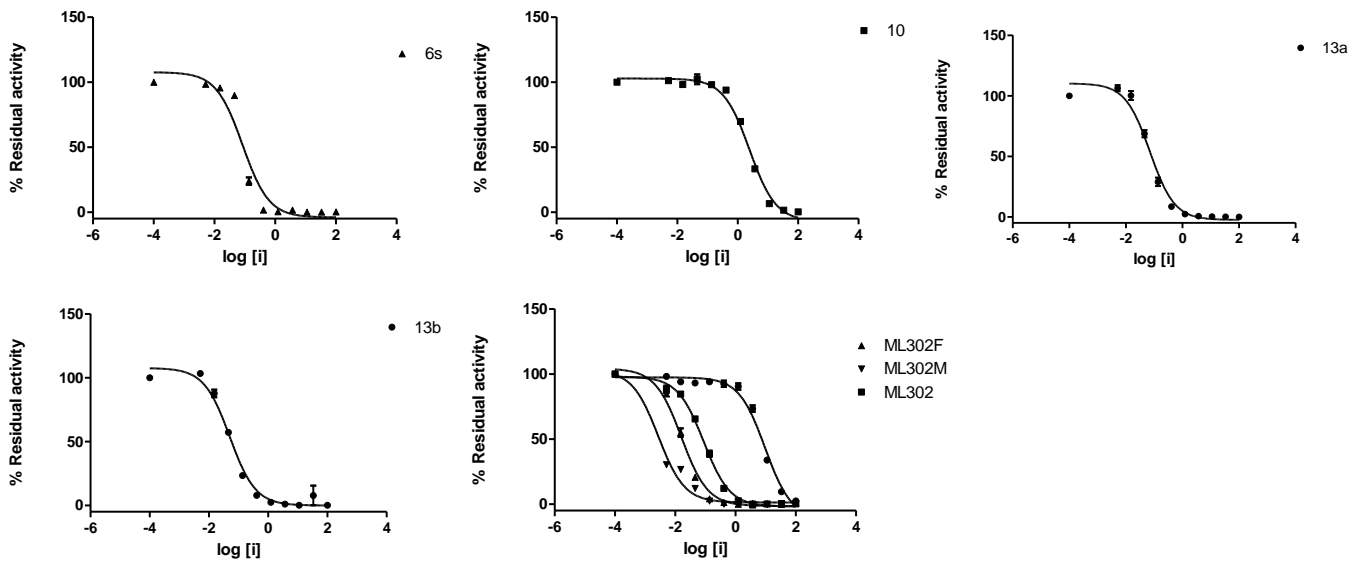

**Figure S4:** IC<sub>50</sub> curves for NDM-1 inhibition time courses. Residual activities were calculated from the initial rate of FC5 hydrolysis after incubation of the enzyme with the inhibitor for 10 minutes.

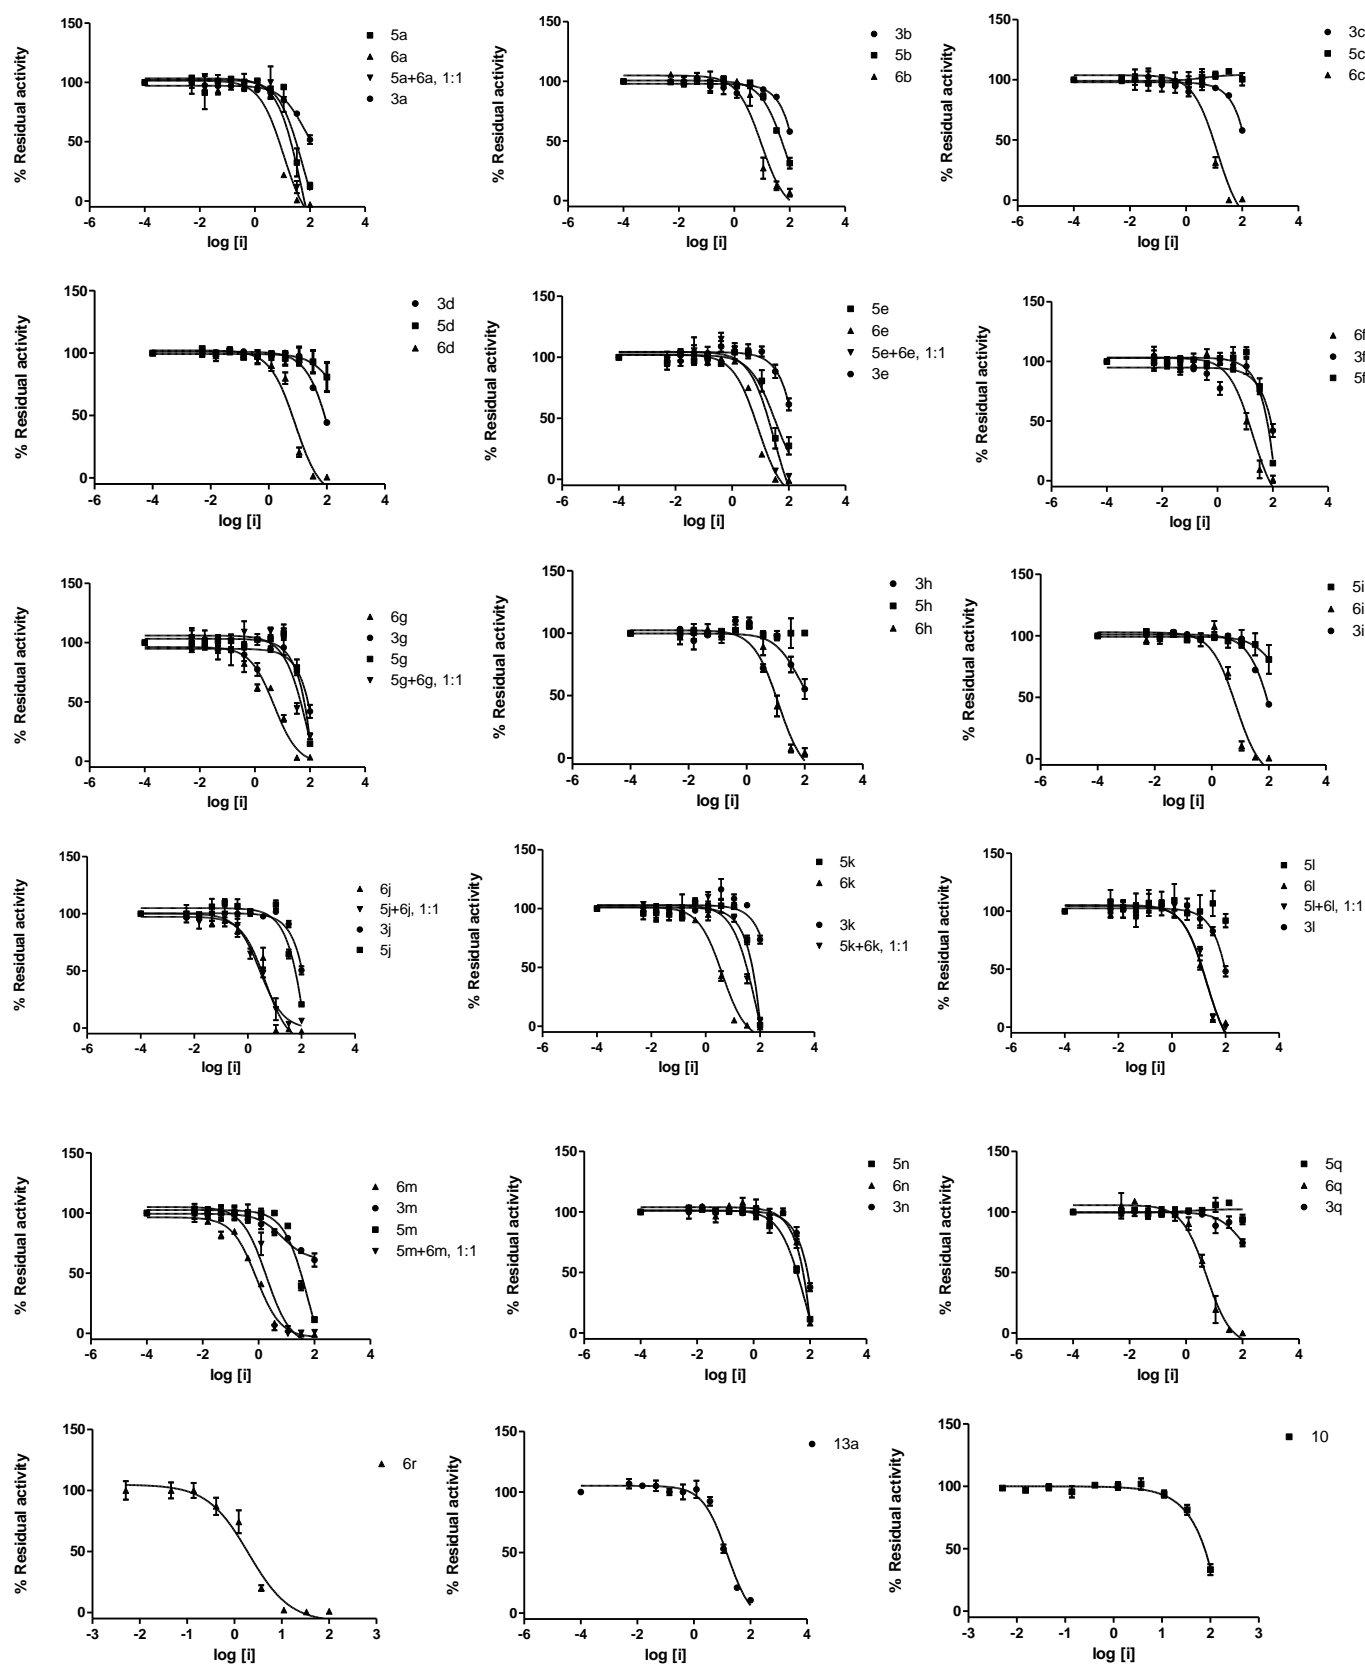

Figure S4 continued

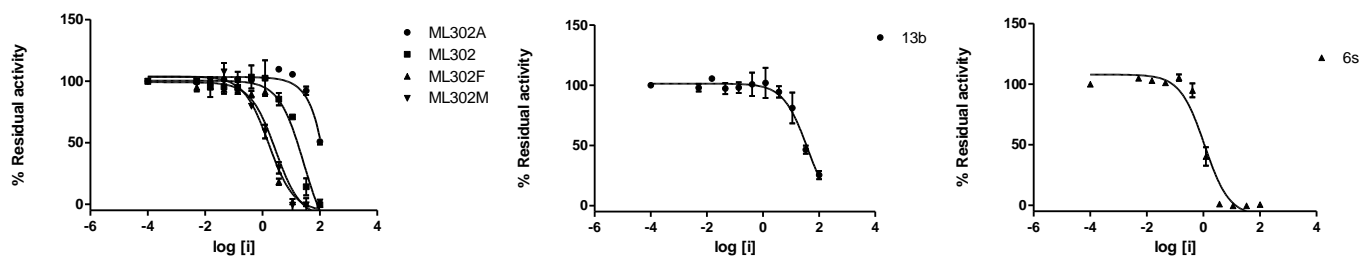

**Figure S5:** IC<sub>50</sub> curves for SPM-1 inhibition time courses. Residual activities were calculated from the initial rate of FC5 hydrolysis after incubation of the enzyme with the inhibitor for 10 minutes.

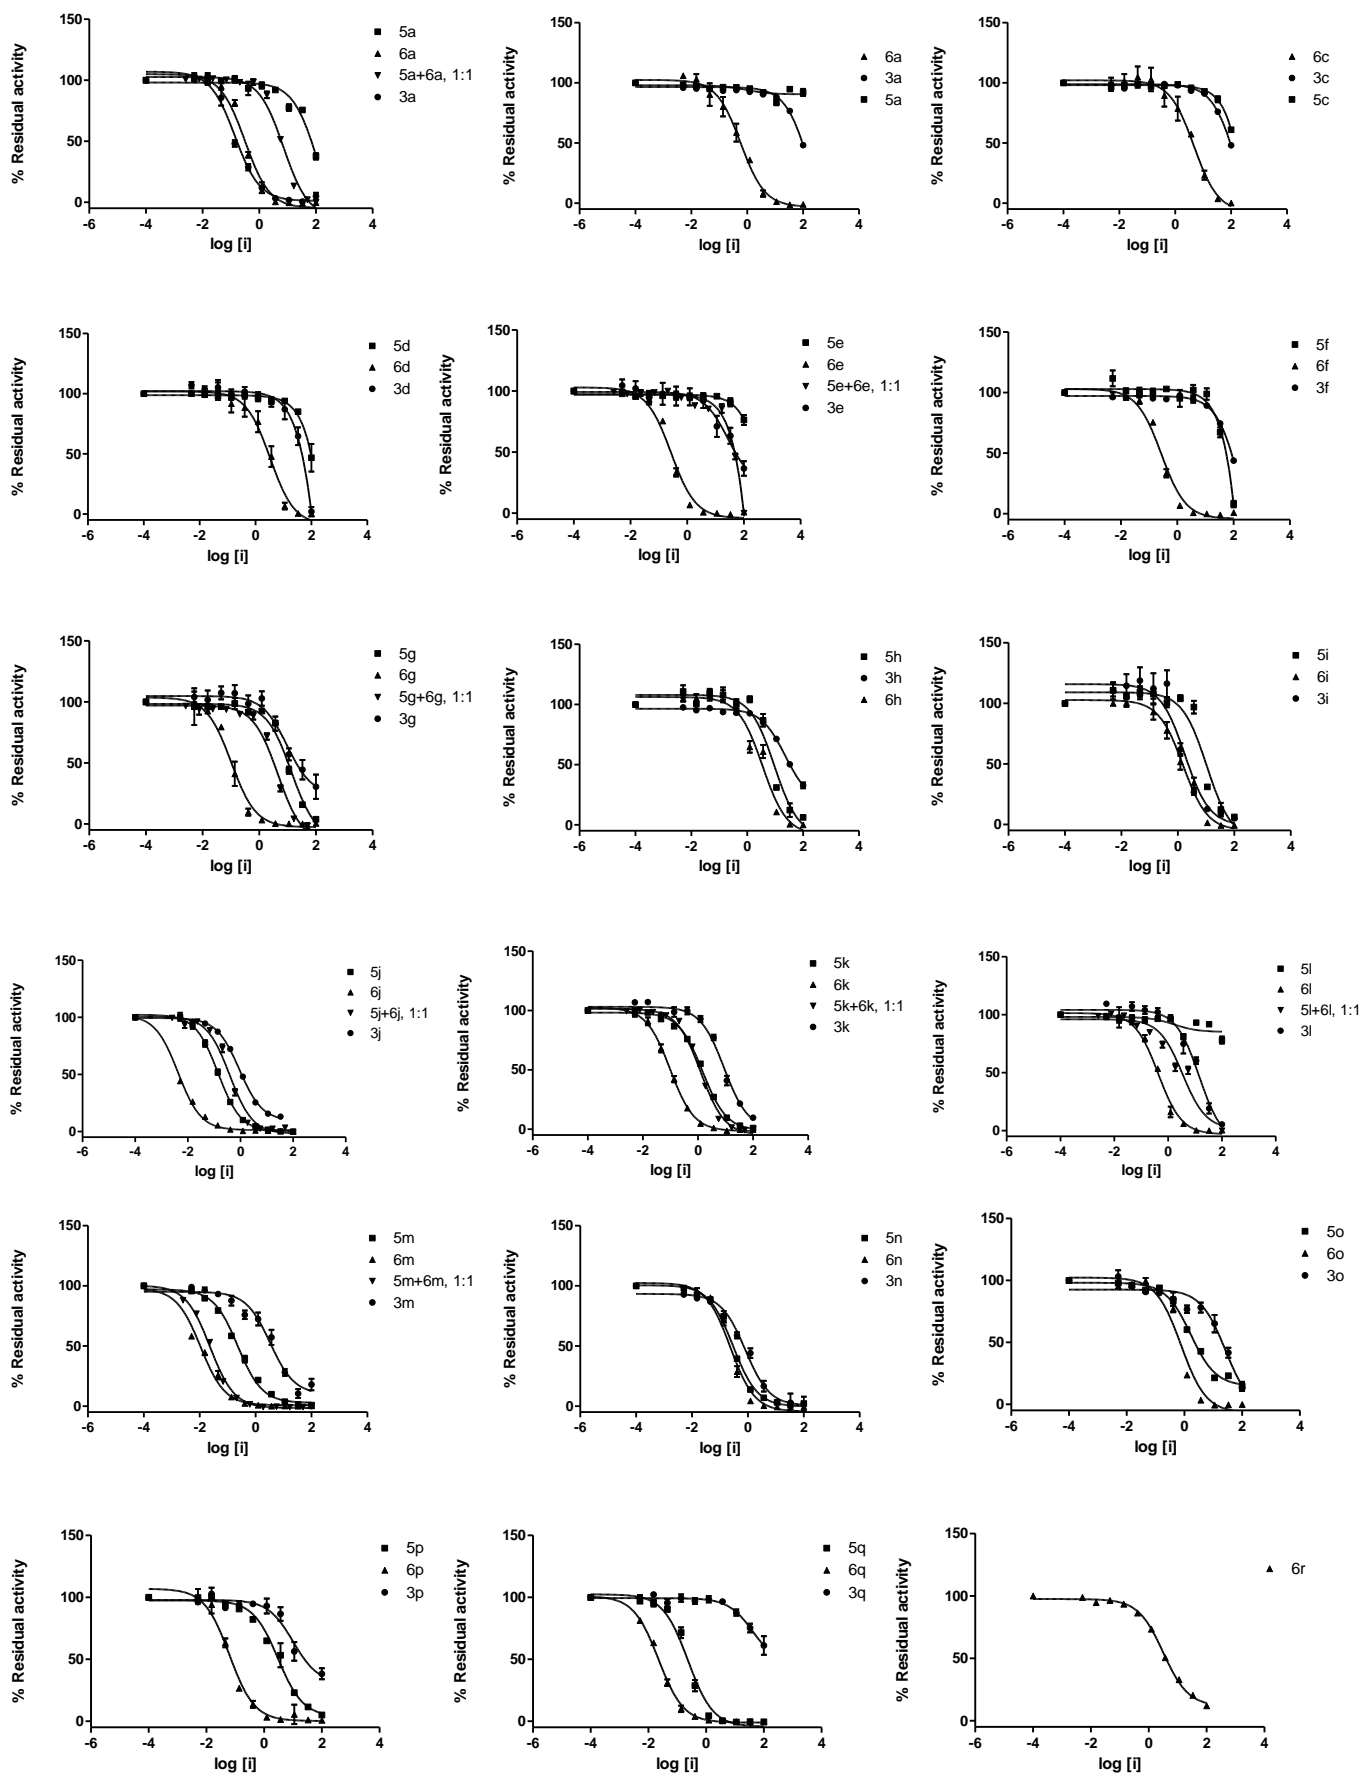

Figure S5 continued

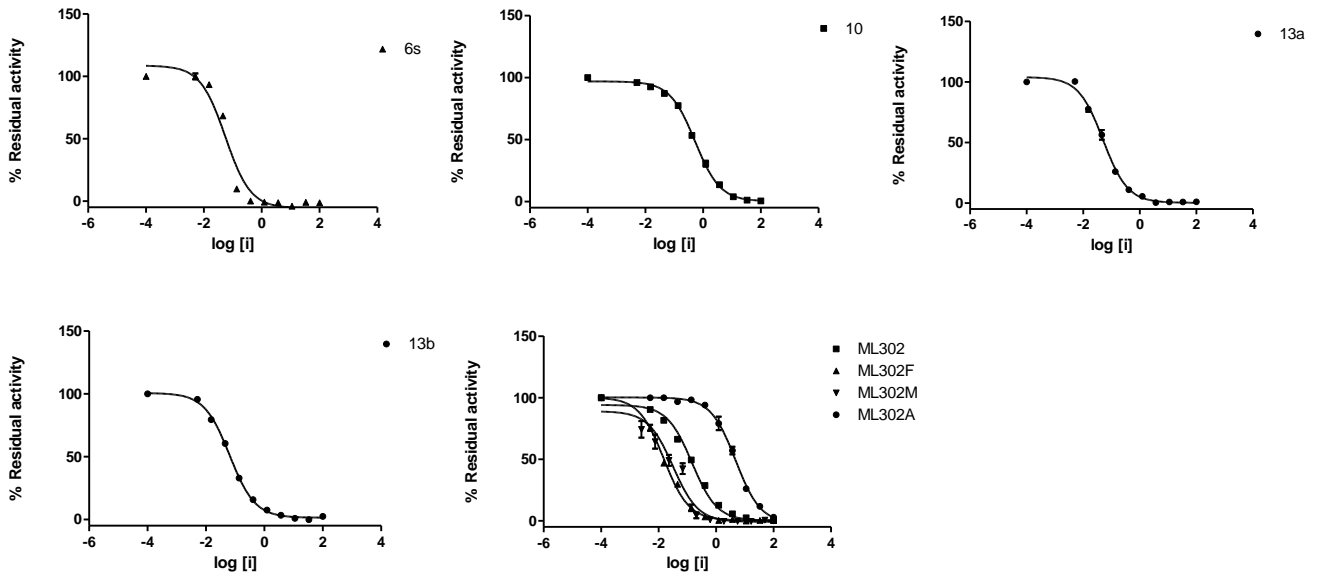

**Figure S6:** IC<sub>50</sub> curves for VIM-2 inhibition time courses. Residual activities were calculated from the initial rate of FC5 hydrolysis after incubation of the enzyme with the inhibitor for 10 minutes.

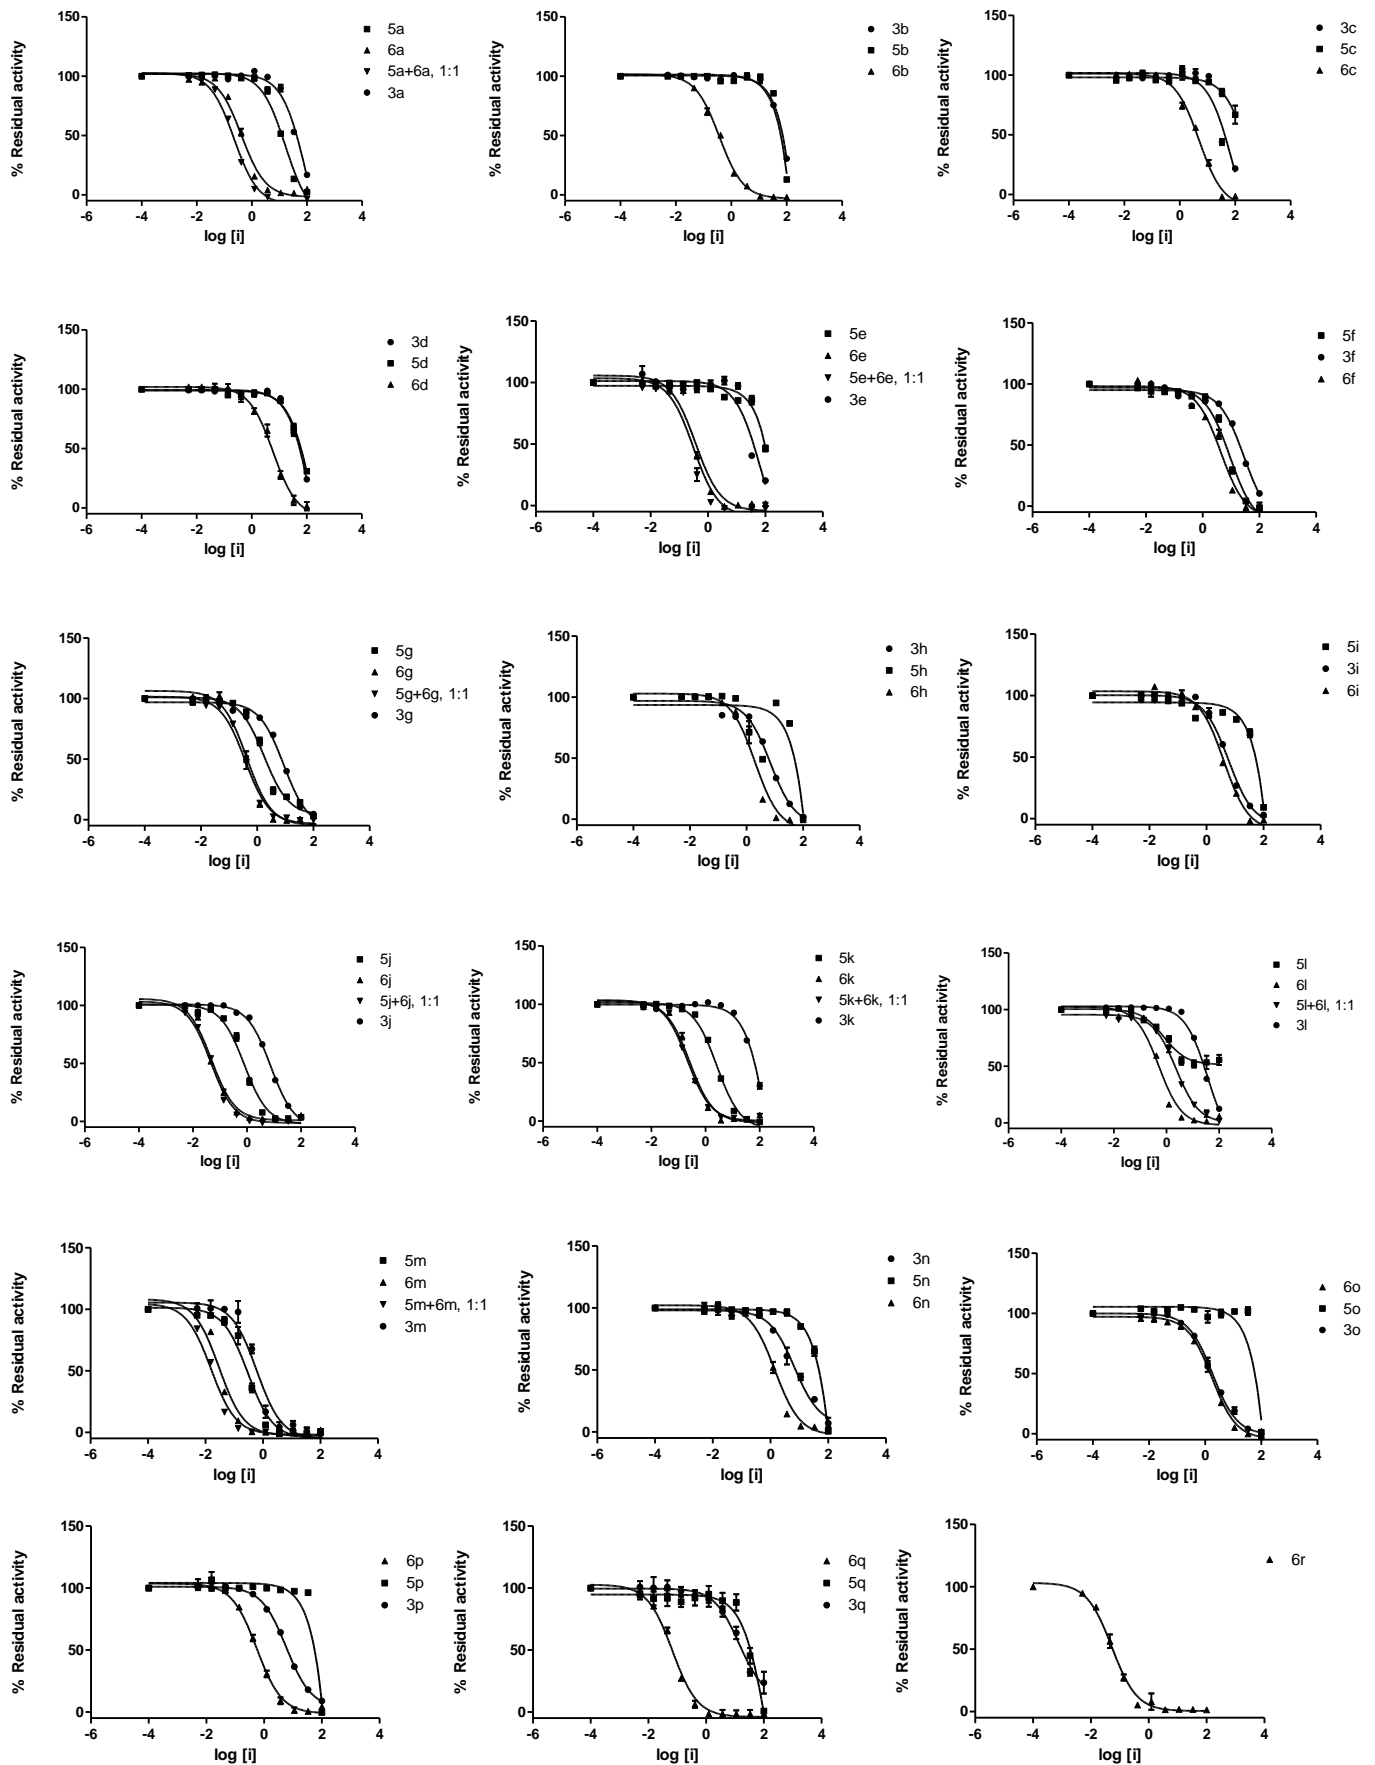

Figure S6 continued

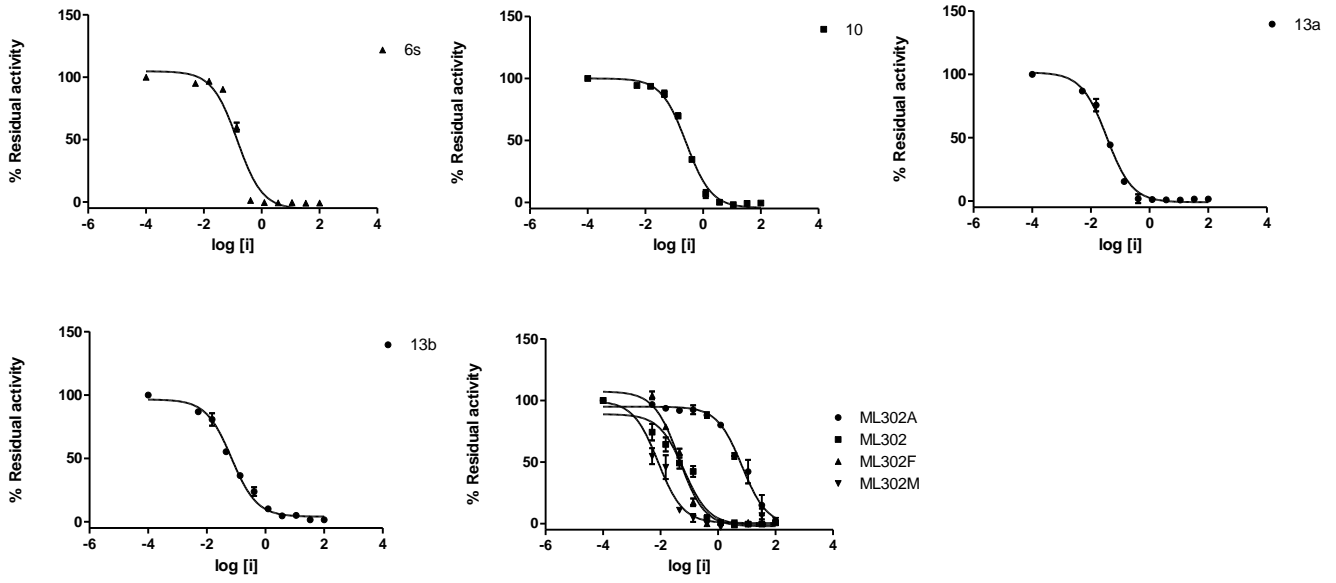



**Figure S7.**  $^1\text{H}$  NMR (700MHz) stability test for compound **10**. **A**, **10** (200  $\mu\text{M}$ ) in  $\text{NH}_4\text{HCO}_3$  (50 mM, pH 7.5 in  $\text{D}_2\text{O}$ ) in the absence of NDM-1,  $^1\text{H}$  NMR time course over 18 hours; **B**, **10** (200  $\mu\text{M}$ ) in  $\text{NH}_4\text{HCO}_3$  (50 mM, pH 7.5 in  $\text{D}_2\text{O}$ ) in the presence of NDM-1 (1  $\mu\text{M}$ ),  $^1\text{H}$  NMR time course over 18 hours; **C**, **10** (200  $\mu\text{M}$ ) in in Tris- $\text{d}_{11}$  (50 mM, pH 7.5 in  $\text{D}_2\text{O}$ ) in the absence of NDM-1,  $^1\text{H}$  NMR time course over 18 hours; **D**, **10** (200  $\mu\text{M}$ ) in Tris- $\text{d}_{11}$  (50 mM, pH 7.5 in  $\text{D}_2\text{O}$ ) and in the presence of NDM-1 (1  $\mu\text{M}$ ),  $^1\text{H}$  NMR time course over 18 hours.

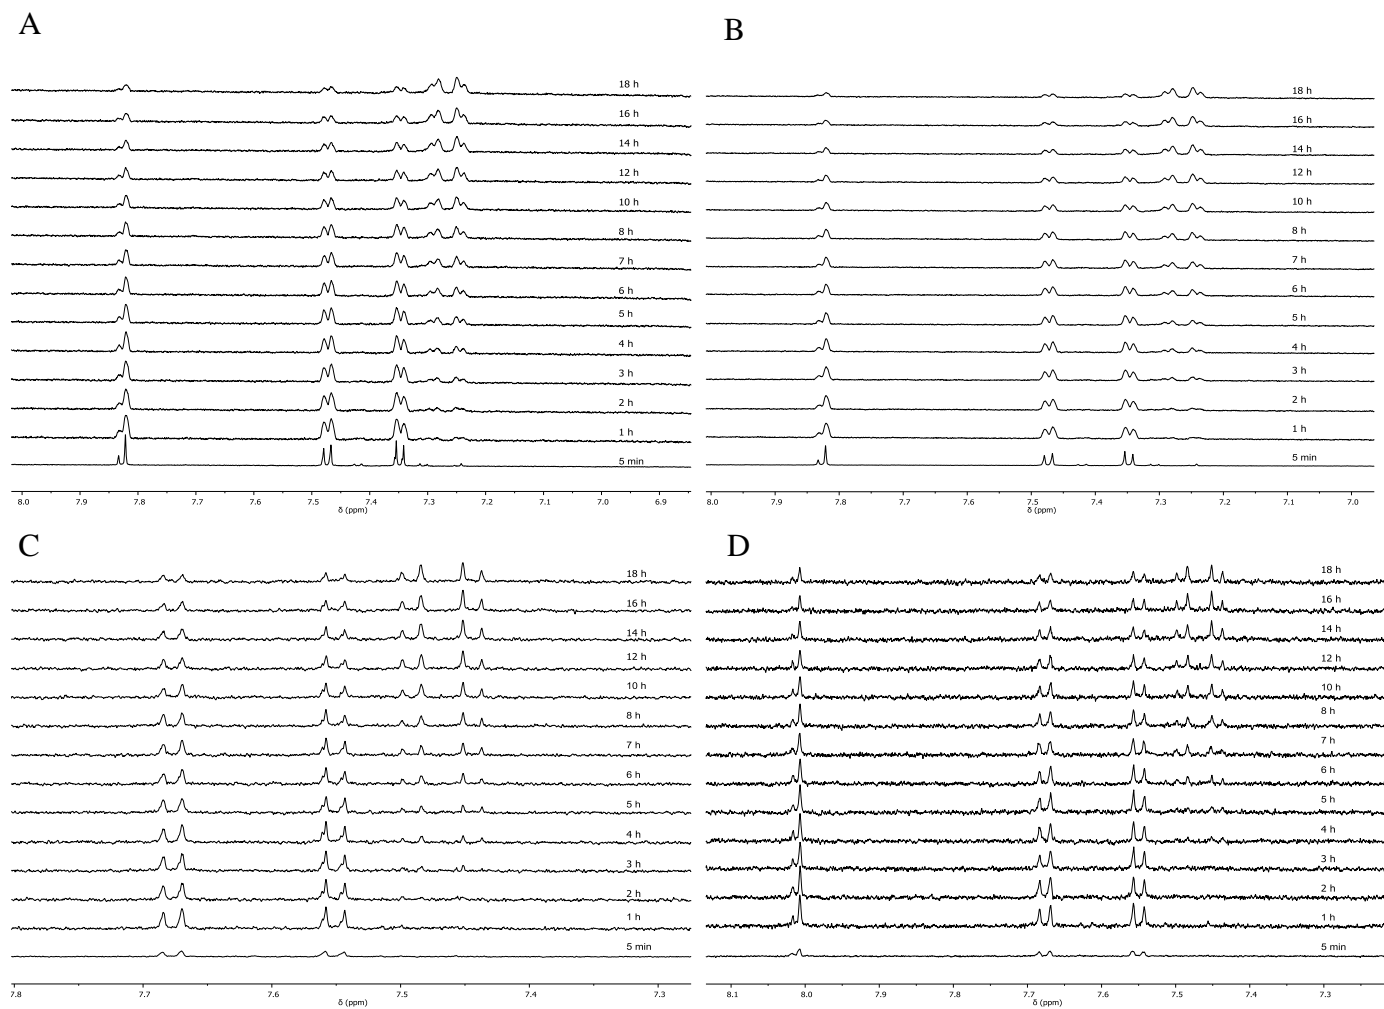

**Figure S8.** Reaction of compound **10** (200  $\mu\text{M}$  initial concentration) monitored over 18 hours by  $^1\text{H}$  NMR (600/700MHz) in: (A) in  $\text{NH}_4\text{HCO}_3$  (50 mM, pH 7.5,  $\text{D}_2\text{O}$  solution) in the absence of NDM-1 (**10** purple diamonds, **10F/ML302F** grey triangles); (B) in  $\text{NH}_4\text{HCO}_3$  (50 mM, pH 7.5,  $\text{D}_2\text{O}$  solution) in the presence of NDM-1 (1  $\mu\text{M}$ ) (**10** pink triangles, **ML302F** blue hexagons); (C) in Tris- $\text{d}_{11}$  (50 mM, pH 7.5,  $\text{D}_2\text{O}$  solution) in the absence of NDM-1 (**10** red squares, **10F/ML302F** blue circles); and (D) in Tris- $\text{d}_{11}$  (50 mM, pH 7.5,  $\text{D}_2\text{O}$  solution) in the presence of NDM-1 (1  $\mu\text{M}$ ) (**10** yellow triangles, **10F/ML302F** green triangles).

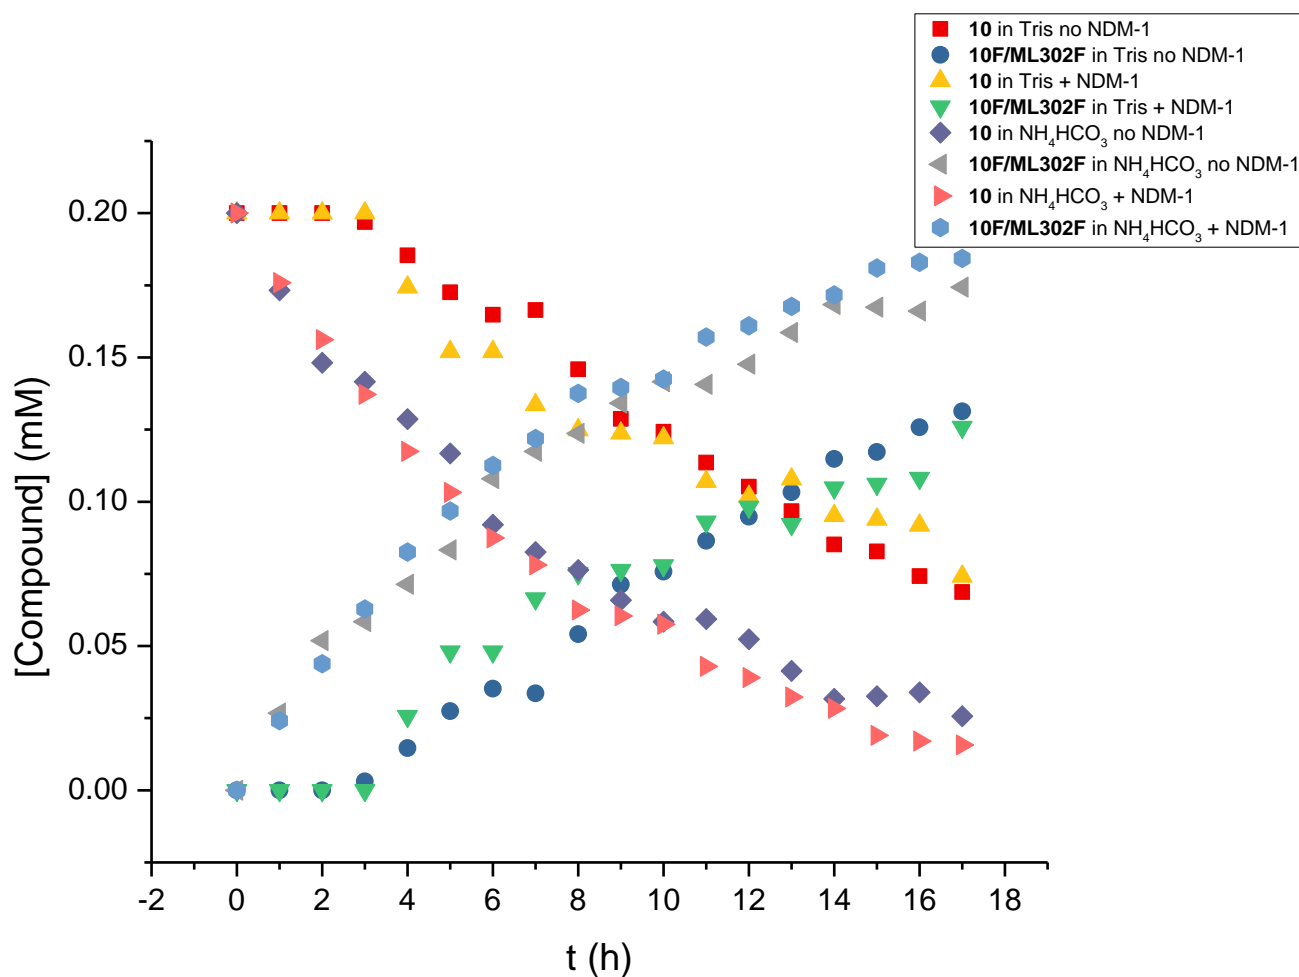

## 5. Crystallography

**Table S2. Data collection and refinement statistics.**

| Dataset (PDB ID)                                    | BCII (6c) 305<br>(5JMX)             | BCII (6k) 307<br>(6EUM)         | BCII (6l) 308<br>(6EWE)          | BCII (6s) KDU197<br>(6F2N)        | VIM2 ML302F (6EW3)                 |
|-----------------------------------------------------|-------------------------------------|---------------------------------|----------------------------------|-----------------------------------|------------------------------------|
| Beamline                                            | DLS I03                             | DLS I02                         | DLS I03                          | DLS I03                           | DLS I04-1                          |
| Wavelength                                          | 0.97625                             | 0.95000                         | 0.97625                          | 0.97625                           | 0.92819                            |
| Resolution range <sup>§</sup>                       | 68.95 - 1.44 (1.48 - 1.44)          | 19.53 - 1.18 (1.21 - 1.18)      | 35.31 - 1.46 (1.50 - 1.46)       | 26.87 - 1.15 (1.19 - 1.15)        | 51.27 - 2.14 (2.22 - 2.14)         |
| Space group                                         | C 2 <sub>1</sub>                    | C 2 <sub>1</sub>                | C 2 <sub>1</sub>                 | C 2 <sub>1</sub>                  | C 2 <sub>1</sub>                   |
| Unit cell                                           | 53.25 61.24<br>69.05 90 93.09<br>90 | 53.18 61.44 70.18<br>90 93.2 90 | 53.19 61.01 69.54<br>90 92.99 90 | 53.17 61.67 69.68 90<br>93.132 90 | 102.48 78.91 67.46<br>90 130.48 90 |
| Unique reflections <sup>§</sup>                     | 40059 (2931)                        | 71979 (5168)                    | 38243 (2839)                     | 77778 (7357)                      | 22190 (2217)                       |
| Multiplicity <sup>§</sup>                           | 6.6 (6.4)                           | 16.5 (17)                       | 6.6 (6.3)                        | 6.6 (6.3)                         | 3.4 (3.4)                          |
| Completeness (%) <sup>§</sup>                       | 99.9 (100.0)                        | 97.23 (94.63)                   | 99.2 (98.6)                      | 97.33 (92.15)                     | 98.01 (98.27)                      |
| Mean I/σ(I) <sup>§</sup>                            | 10.1 (1.1)                          | 14.1 (1.1)                      | 9.7 (1.1)                        | 14.2                              | 8.7 (2.1)                          |
| Wilson B-factor                                     | 19.35                               | 15.48                           | 20.07                            | 11.70                             | 22.50                              |
| R <sub>merge</sub> <sup>§</sup>                     | 0.083 (1.567)                       | 0.090 (2.490)                   | 0.089 (1.544)                    | ND                                | 0.112 (0.517)                      |
| R <sub>meas</sub> <sup>§</sup>                      | 0.104 (1.189)                       | 0.101 (2.642)                   | 0.109 (0.724)                    | 0.069                             | ND                                 |
| R <sub>pim</sub> <sup>§</sup>                       | 0.041 (0.738)                       | 0.025 (0.631)                   | 0.043 (1.845)                    | ND                                | ND                                 |
| CC <sup>1/2</sup> <sup>§</sup>                      | 0.998 (0.487)                       | 0.999 (0.563)                   | 0.998 (0.440)                    | 0.998(0.753)                      | ND                                 |
| Reflections used in refinement <sup>§</sup>         | 40041 (2906)                        | 71973 (5146)                    | 38231 (2830)                     | 77738 (7345)                      | 22187 (2217)                       |
| Reflections used for R <sub>free</sub> <sup>§</sup> | 2008 (219)                          | 3416 (343)                      | 1938 (232)                       | 2002 (191)                        | 1107 (138)                         |
| R <sub>work</sub> <sup>††§</sup>                    | 0.1525 (0.3239)                     | 0.1391 (0.2796)                 | 0.1477 (0.2787)                  | 0.1462 (0.3009)                   | 0.1691 (0.2267)                    |
| R <sub>free</sub> <sup>††§</sup>                    | 0.1859 (0.3490)                     | 0.1574 (0.2938)                 | 0.1739 (0.3186)                  | 0.1637 (0.3189)                   | 0.2096 (0.2745)                    |
| # non-hydrogen atoms                                | 1929                                | 2120                            | 1941                             | 2126                              | 3933                               |
| macromolecules                                      | 1698                                | 1838                            | 1738                             | 1756                              | 3612                               |
| ligands                                             | 38                                  | 34                              | 34                               | 30                                | 65                                 |
| solvent                                             | 193                                 | 248                             | 169                              | 340                               | 256                                |
| Protein residues                                    | 219                                 | 222                             | 218                              | 221                               | 463                                |
| RMS (bonds) <sup>¶</sup>                            | 0.012                               | 0.019                           | 0.013                            | 0.019                             | 0.003                              |
| RMS (angles) <sup>¶</sup>                           | 1.38                                | 1.81                            | 1.53                             | 1.55                              | 0.55                               |
| Ramachandran favored (%)                            | 97.17                               | 97.24                           | 97.20                            | 97.21                             | 96.94                              |
| Ramachandran allowed (%)                            | 2.83                                | 2.76                            | 2.80                             | 2.79                              | 2.84                               |
| Ramachandran outliers (%)                           | 0.00                                | 0.00                            | 0.00                             | 0.00                              | 0.22                               |
| Rotamer outliers (%)                                | 1.08                                | 0.99                            | 1.06                             | 1.05                              | 1.57                               |
| Clashscore                                          | 1.72                                | 2.65                            | 3.11                             | 2.25                              | 1.80                               |
| Average B-factor (Å <sup>2</sup> )                  | 29.13                               | 24.24                           | 29.36                            | 19.72                             | 26.79                              |
| Macromolecules (Å <sup>2</sup> )                    | 27.32                               | 22.46                           | 27.78                            | 17.31                             | 26.31                              |
| Ligands (Å <sup>2</sup> )                           | 41.30                               | 33.32                           | 47.33                            | 27.27                             | 33.08                              |
| Solvent (Å <sup>2</sup> )                           | 42.65                               | 36.22                           | 41.99                            | 31.50                             | 31.95                              |
| Number of TLS groups                                | 9                                   | NA                              | NA                               | NA                                | 17                                 |

§ Parentheses indicate high resolution shell

§§  $R_{\text{merge}} = \sum_j \sum_h |I_{hj} - \langle I_h \rangle| / \sum_j \sum_h \langle I_h \rangle \times 100$

††  $R_{\text{work}} = \sum | |F_{\text{obs}}| - |F_{\text{calc}}| | / |F_{\text{obs}}| \times 100$

† R<sub>free</sub>, based on 2-5% of the total reflections

¶ RMS deviation from ideality.

Statistics for the highest-resolution shell are shown in parentheses.

**Figure S9.** View from a crystal structure of BcII (turquoise) in complex with **6c** (yellow) (PDB ID: 5JMX). Active site residues shown as ball-and-stick with atoms coloured C (white), O (red), N (blue), Zn (grey spheres), water (red spheres). Ligand interactions are indicated with black dashed lines. Ligand mFo-DFc OMIT maps contoured to 3.0  $\sigma$  are shown as light grey mesh. Bottom figure wall eye stereo.

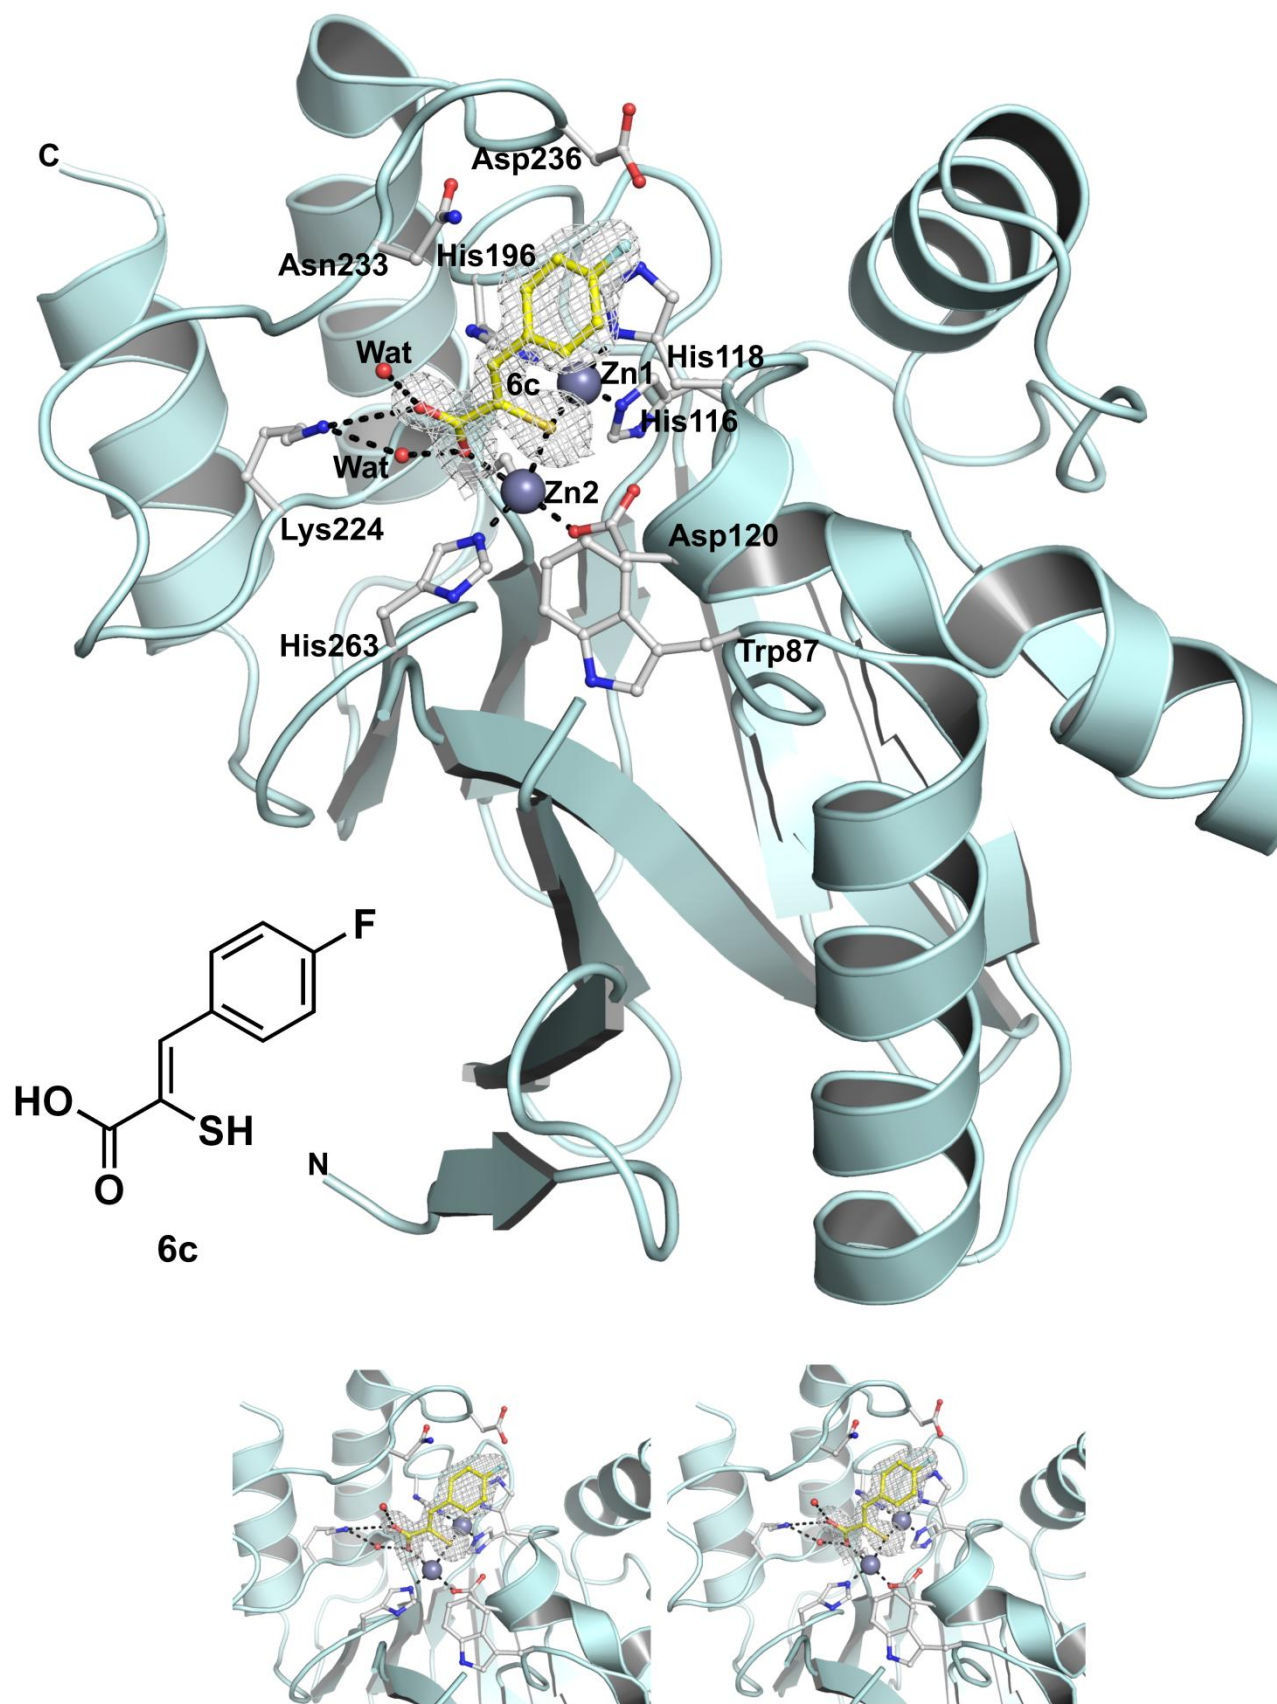

**Figure S10.** View from a crystal structure of BcII (turquoise) in complex with **6k** (salmon) (PDB ID: 6EUM). Active site residues shown as ball-and-stick with atoms coloured C (white), O (red), N (blue), Zn (grey spheres), water (red spheres). Ligand interactions are indicated with black dashed lines. Ligand mFo-DFc OMIT maps contoured to  $3.0 \sigma$  are shown as light grey mesh. Bottom figure wall eye stereo.

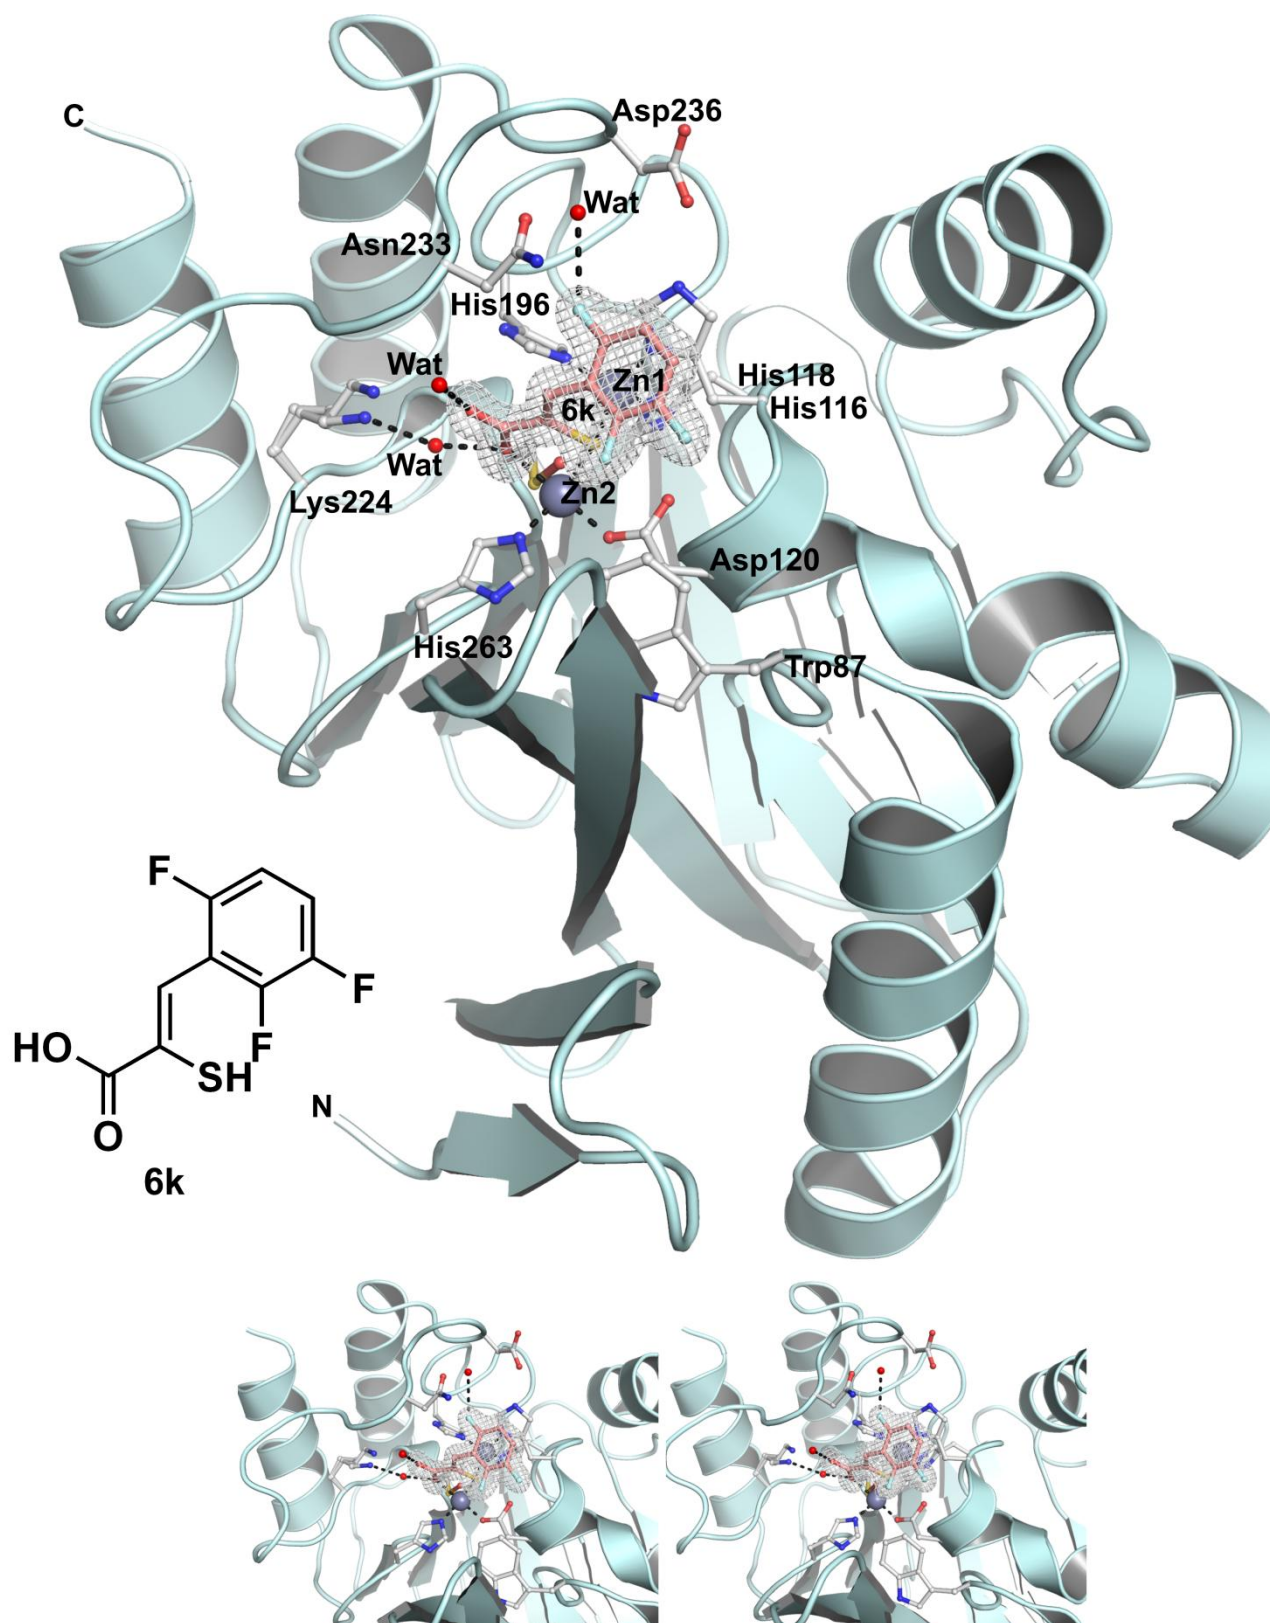

**Figure S11.** View from a crystal structure of BcII (turquoise) in complex with **6l** (purple) (PDB ID: 6EWE). Active site residues shown as ball-and-stick with atoms coloured C (white), O (red), N (blue), Zn (grey spheres), water (red spheres). Ligand interactions are indicated with black dashed lines. Ligand mFo-DFc OMIT maps contoured to 3.0  $\sigma$  are shown as light grey mesh. Bottom figure wall eye stereo.

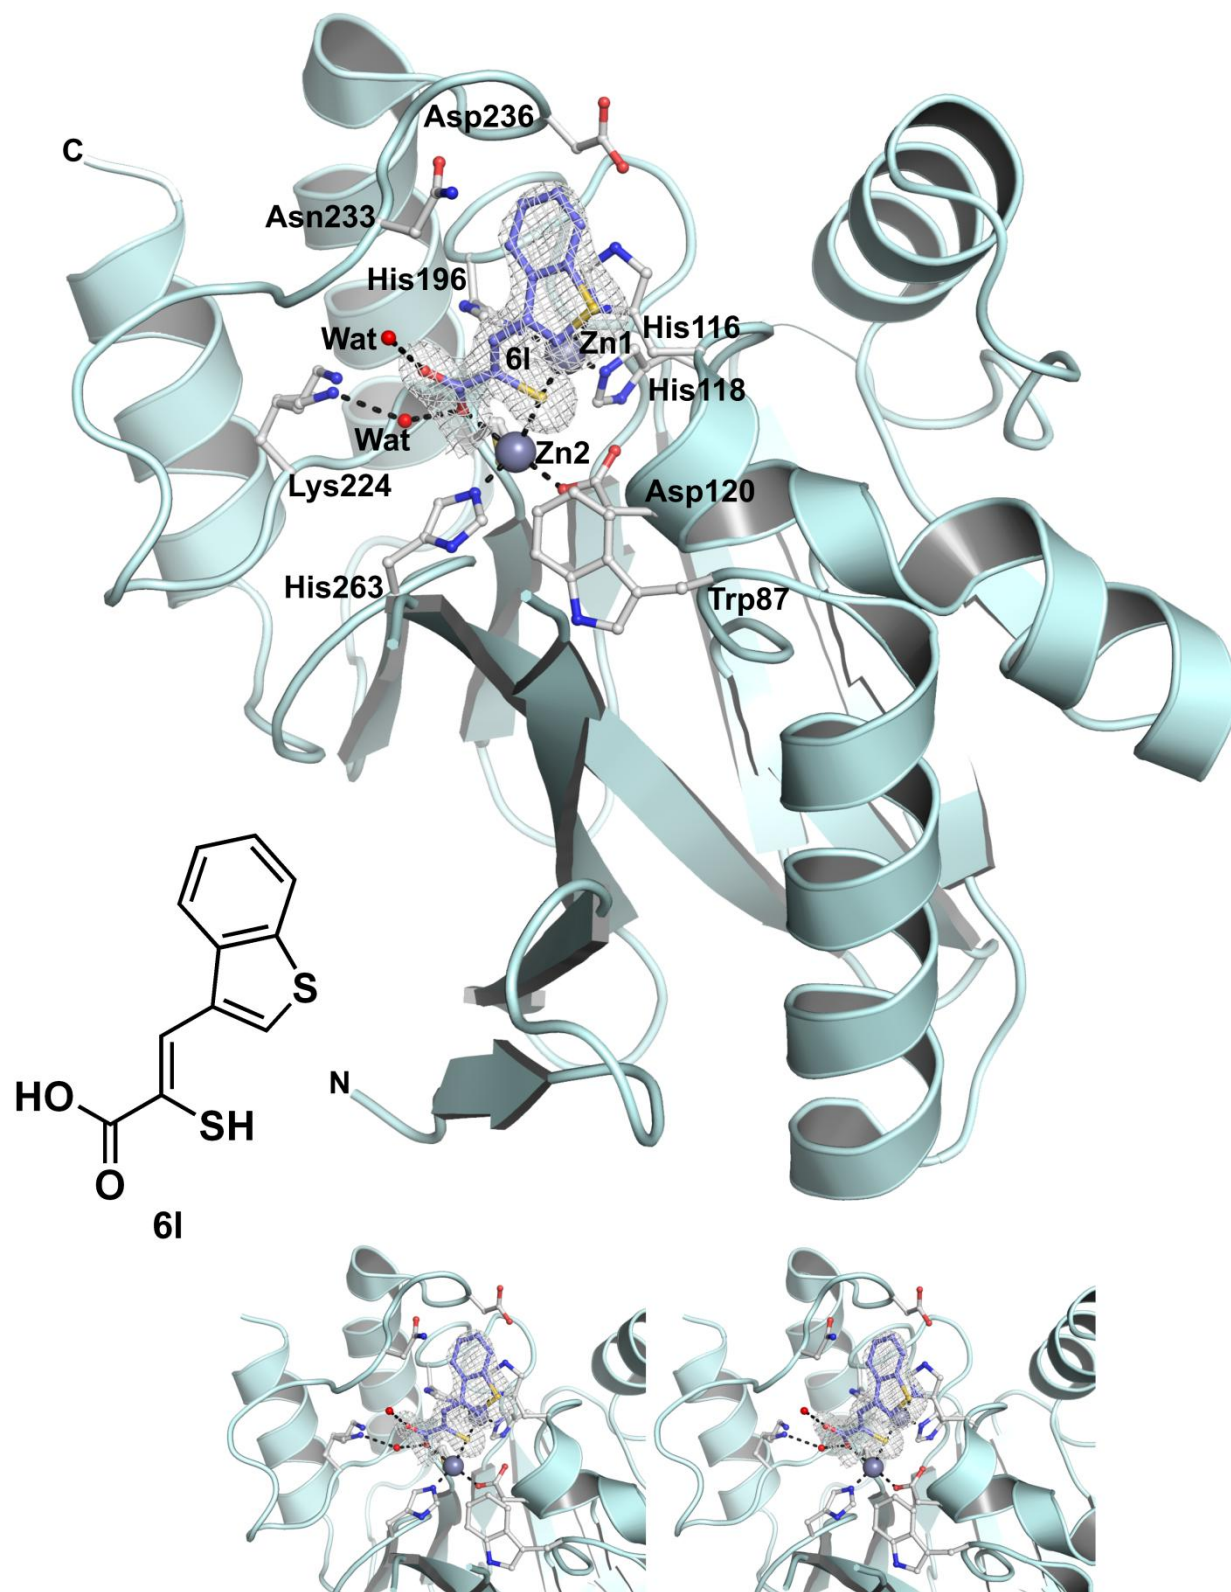

**Figure S12.** View from a crystal structure of VIM-2 (pink) in complex with **ML302F** (wheat) (PDB ID: 6EW3). Active site residues shown as ball-and-stick with atoms coloured C (white), O (red), N (blue), Zn (grey spheres), water (red spheres). Ligand interactions are indicated with black dashed lines. Ligand mFo-DFc OMIT maps contoured to  $3.0 \sigma$  are shown as light grey mesh. Bottom figure wall eye stereo.

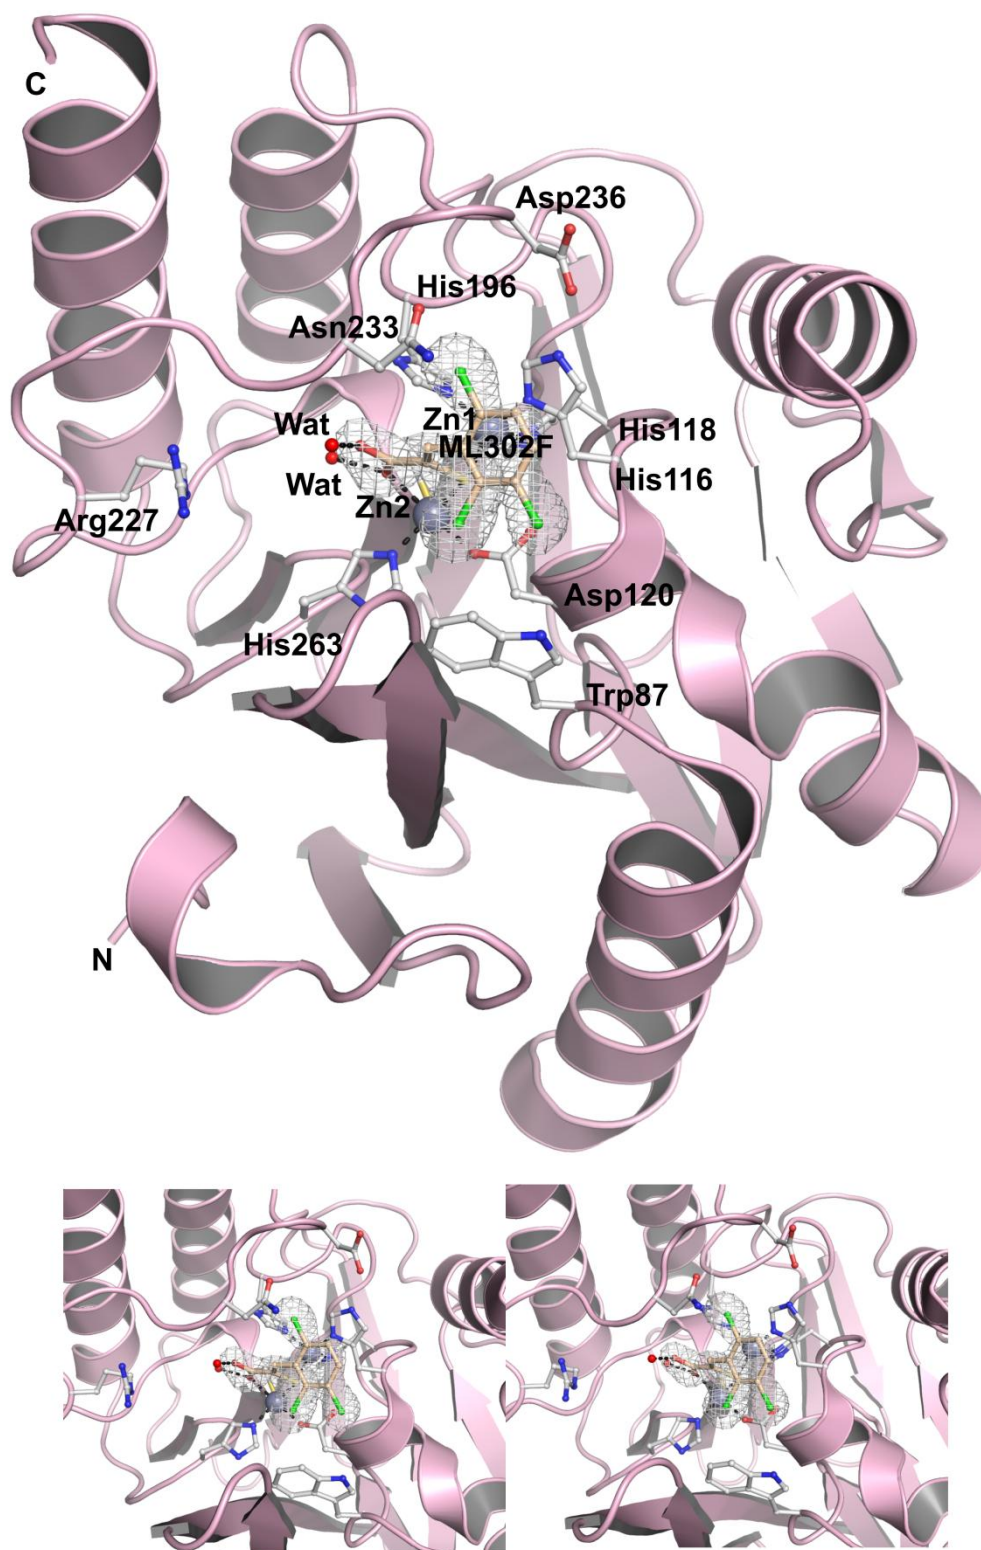

**Figure S13. Crystallographic analysis reveals that the binding modes of enethiol carboxylate are similar to those of the MBL  $\beta$ -lactam antibiotic hydrolysis products. a.** Binding mode of hydrolysed benzylpenicillin (penicillin G, cyan) with NDM-1 (PDB code: 4EYF)<sup>1</sup>, **b.** Binding mode of **6s** (green) obtained by co-crystallization of **6s** with BcII (PDB ID:6F2N).

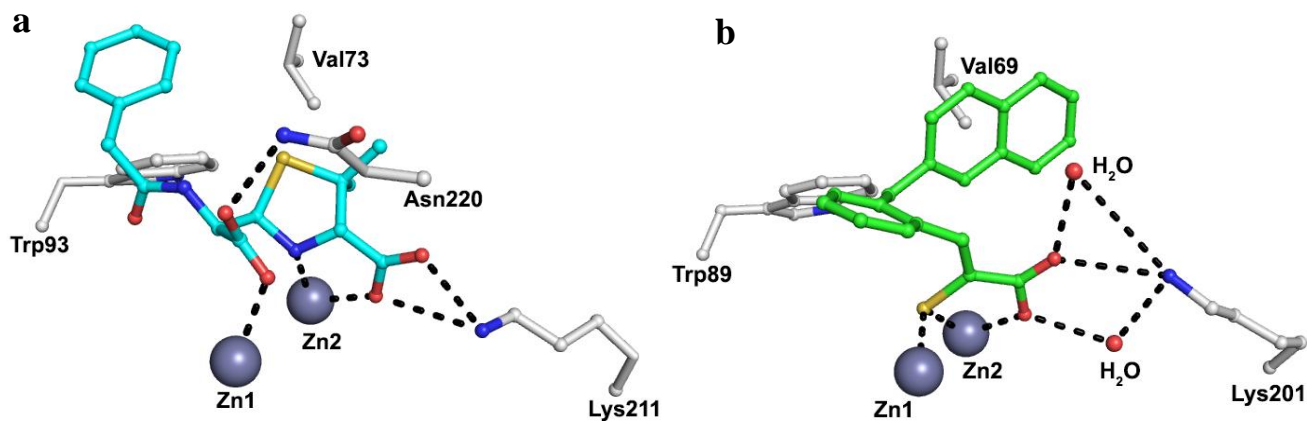



## **6. Author contributions**

Dong Zhang, Marios S. Markoulides, Anna M. Rydzik, Klaus-Daniel Umland and Corentin Bon carried out synthesis. Marios S. Markoulides assisted with supervision.

Jürgen Brem carried out protein purifications.

Jürgen Brem, Michael A. McDonough, Patrick Collins, Samuel T. Cahill, Dmitrijs Stepanovs, and Ahmed El-Hussein carried out crystallography, with supervision by Frank von Delft, Jürgen Brem and Michael A. McDonough.

Assays were carried out by Dong Zhang, David Wang, and Samuel T. Cahill.

NMR experiments were carried out by Jos J. A. G. Kamps, with supervision by Timothy D. W. Claridge.

Christopher J. Schofield conceived the study and supervised the work.

The manuscript was written by Christopher J. Schofield, Michael A. McDonough and Dong Zhang with help from all the authors.

## 7. References:

- (1) King DT, Worrall LJ, Gruninger R, Strynadka NC. *J.Am.Chem.Soc.* 2012, *134*, 11362-11365
